# Supplementary material for: Ambient temperature regulates root circumnutation in rice through the ethylene pathway: transcriptome analysis reveals key genes involved
Source: Frontiers journal article supplement (doi:10.3389/fpls.2024.1348295), 2024-03-08
Supplement: Data_Sheet_5.PDF [file Data_Sheet_5.PDF]

## **Supplementary Tables 1-12 guidance**

**Supplementary Table 1** Information on genes selected for qRT-PCR analysis

**Supplementary Table 2** Summary of transcriptome data

**Supplementary Table 3** Expression profiles of all individual genes in 12 samples under treatments of 25°C, 35°C, 35°C+STS, and 35°C+AOA

**Supplementary Table 4** 743 DEGs in the comparison groups of 25°C vs 35°C, 35°C vs 35°C+STS, and 35°C vs 35°C+AOA

**Supplementary Table 5** Expression profiles of 372 DEGs for WGCNA

**Supplementary Table 6** Genes in 3 modules output by WGCNA

**Supplementary Table 7** GO function classification of 268 DEGs in turquoise module

**Supplementary Table 8** The corresponding gene names, sources, and sequences in turquoise module

**Supplementary Table 9** Expression profiles of the ethylene synthase genes and ethylene response factor genes

**Supplementary Table 10.** Expression profiles of genes related to auxin and genes regulating cell elongation

**Supplementary Table 11.** Co-expression network of 268 genes in turquoise module

**Supplementary Table 12.** Processing and analysis of qRT-PCR data
