# Supplementary material for: Ambient temperature regulates root circumnutation in rice through the ethylene pathway: transcriptome analysis reveals key genes involved
Source: Front Plant Sci. 2024 Mar 8;15:1348295. doi: 10.3389/fpls.2024.1348295 (PMC10957643; doi:10.3389/fpls.2024.1348295)
Supplement: Supplementary file 1 [file Table_1.xlsx]

## Sheet: Table S1
Table S1. Information on genes selected for qRT-PCR analysis
Table S1-1. Information on genes selected for qRT-PCR analysis under treatments of 25°C, 35°C, 35°C+AOA, and 35°C+STS
Gene Symbol	Gene ID	Gene Name	Description in RAP-DB	Description in Gene Bank	Primer Sequence (5' to 3')	Annealing (°C)	Size (bp)	Gene Sequence
LOC4346629	Os09g0287000	ERF63	ETHYLENE RESPONSE FACTOR 63	ethylene-responsive transcription factor 1-like	F:GGACGCCACAACGAAGATGA R:ATCGTCCCTGCACCAGAAGG	59	147	ATGTGTGGAGGAGCACTGATCCCGAACGACTATGGCGACAAGCCGCCGCCGCCGCCGTCGGAGTCGTCGGAGTGGGACGCCACAACGAAGATGAAGAAGAAGAAGAAGCGTGGTGGCGGCGGCGACGACGACTGGGAGGCCGCCTTCCGGGAGTTCATCGCTGGCGACGACGACGACGACGACGGCGGCGTTTCCATGTTCCCTTCTGGTGCAGGGACGATGGAGACGACCACAGAGGTGGCGCCGGCGGCGGCGGTGGTGGAGAGGCCGCGGCGGCGGCGAAGGGTGAGGCGGAGCTACCCGTACCGCGGCGTCCGGCAGCGGCCGTGGGGGCGGTGGGCGTCGGAGATCCGCGACCCCGTCAAGGGCGCCCGCGTCTGGCTCGGCACCTTCGACACC…
LOC4334864	Os03g0860100	ERF83	ETHYLENE RESPONSE FACTOR 83	ethylene-responsive transcription factor 15	F:CATTGCTGCATGTCGCTTCA R:CGACGCGATTCGAGGAAGTT	59	122	ATGCATTGCTGCATGTCGCTTCATCCTCACCGCCGCCACGGCGACGGCGACGTCGACGGATCAGCATCAGGATCAGGATCAGCGCGCCTCACCGCCGGCCTCATCAACTTCCTCGAATCGCGTCGCGCCGGCGCCATGAGCACCACCAACAGCTCATCCTCTGTCTCTGTCCCAGCCATGGACGCCCATGGACAGGAGGAGGAGGAGGAGCCGATGCAGGTGCAGCAACAGCAGGCGTTCCGCGGGGTGCGCAAGCGGCCATGGGGCAAGTTTGCGGCGGAGATCCGCGACTCGACGCGCAACGGCGTGCGCGTGTGGCTGGGCACGTTCGACAGCGCGGAGGAGGCGGCGCTGGCCTACGACCAGGCGGCGTTCGCCATGCGCGGGTCGGCGGCGGTG…
LOC4335720	Os04g0399800	ERF82	ETHYLENE RESPONSE FACTOR 82	ethylene-responsive transcription factor LEP	F:GAAGGAGAGGCACTGGCTGG R:AACGGCTGGAGCAGCTGATC	59	198	ATGATGAACTTCTCCTCGTACTTCTACTCGTCGTCGGCGGCGGCGGCGGGTGGTGGTGGTGGTGGTGGGGAGAAGAAGTCGTCGTCGTCGTCGGCGTCGAAGAAGAAGCAGCAGCAGGCGGCGGCGGCGGAGGGAGGGAATAACCAGACGAGGTACCTTGGGGTGAGGAGGAGGCCGTGGGGGAGGTACGCGGCGGAGATCAGGGACCCGGCGACGAAGGAGAGGCACTGGCTGGGGACGTTCGACACGGCGGAGGAGGCCGCCGTCGCCTACGACCGCGCCGCGAGGTCGCTCCGCGGCGCCCGCGCGCGCACCAACTTCGCCTACCCGGACCTCCCCCCGGGCTCCTCCGTCACCCCCTACCTCTCCCCCGACCTCTCCGCCGACGCCTCCGATCAG…
LOC107276410	Os02g0520000	ERF81	ETHYLENE RESPONSE FACTOR 81	ethylene-responsive transcription factor LEP	F:CTCCTCCCTCACGCCCTACC R:ACCCACATTCTGACCGCCAC	59	184	ATGGATTTCTACTTCTTCTCCTCGTCGGCGCCGGCGCCGGAGAAGAAGACGAGGCGGCAGCAGCAGCAGCAGCAGCAGCGGGAGCAGGAGGGGGGTGGAGGAGGGAACGAGGCGAGATACCTCGGCGTGAGGCGGCGGCCGTGGGGCCGGTACGCGGCGGAGATCAGGGACCCGGCGACCAAGGAGCGGCACTGGCTGGGCACGTTCGACACGGCGGAGGAGGCCGCCGTCGCCTACGACCGCGCCGCCCGCACCATCCGCGGCGCCGCCGCGCGCACCAACTTCGCCTACCCGGACCTGCCCCCGGGCTCCTCCCTCACGCCCTACCTCTCCCCCGACCTCTCCACCAACGACCTCCACCGCCACTACTACGGCGCCGGCGCCGGCGCCGACACCCAG…
LOC4343079	Os07g0437000	YUCCA6	YUCCA-LIKE GENE 6	probable indole-3-pyruvate monooxygenase YUCCA5	F:GACTCGAAGGTGCACGTCCT R:ATCCTGTCCACCACCCACAG	59	104	ATGGCGGCGAGGGTGGTGTGGGTGAACGGGCCGATCGTGGTCGGGGCGGGGCCGGCGGGGCTGTCGGTGGCGGCGTGCCTGCGCGAGCGCGGCGTGCCGTCGGTGCTCCTGGAGCGCGCCGACTGCATCGCGTCGCTGTGGCAGCGCCGCACCTACGACCGCCTCCGCCTCCACCTCCCCAAGCACTTCTGCGAGCTCCCCGGGATGCCCTTCCCGGACGGCTACCCGGAGTACCCCGACCGCCGCCAGTTCGTCGACTACCTCCAGGCCTACGCCGCGCGCGCCGGCGTCGAGCCGCGCTTCAACCAGTCCGTCACCTCCGCGCGCTACGACGACGCCGCGGGGCTCTGGCGCGTGCGCGCCGAGGACGTCAGCGTCGATGCGGCGGGCGACGTCACG…
LOC9268702	Os01g0924966	SAUR3	SMALL AUXIN-UP RNA 3	auxin-responsive protein SAUR72	F:CCTGATATCGAGGACGCTGG R:ACGTACACCGAGAAGCACCC	59	102	ATGGCGGCGGCGGCGAGGTCGTCGACGAAGGGGGTGAGGAGGACGAAGAGCCTGATATCGAGGACGCTGGAGCGGTGCAAGTCCGGGCTGAGCAGCGGCGGCGGCGGCAGGTCGGCGGCGGCGCCGGTGGCCGGGTGCTTCTCGGTGTACGTGGGGCCGGAGCGGGAGCGGTTCGTGGTGCGCACCGAGTACGCCAACCACCCGCTGTTCCGGCGGCTGCTCGACGACGCCGAGCGCGAGTACGGCTACGCGGCGCAGGGGCCCCTCGCGCTGCCGTGCGCCGTCGACGCGTTCCTCGACGTGCTCTGGCAGATGGAGCGCGACGGCTGCGGCGGCGGCGGCGACGACGACGACGACCTCTCCATCGGCGGCGGCGGCGCGGCGTCGCCGATATGCGGC…
LOC4330777	Os02g0756200	EXORDIUM*	Similar to Phi-1-like phosphate-induced protein	protein EXORDIUM	F:GCTGTACATACCTCCGGCGA R:GCGTGAATTTGCCGTACCAG	59	101	ATGGCTTCGTTTAGGCTAATGATAGCGGCGGTGTCTCTGAGCCTCGTGCAGCTCTCCATGGGGAGCAGGAGGTTAATGGAGCTGTACATACCTCCGGCGAGTGACCAGCTCACGTACCACCACGGCAGCGTGCTCAGTGGCGACATCCCGGTGTCCATCCTCTGGTACGGCAAATTCACGCCGACGCAGATGTCGATCATCGCCGACTTCGTCGTCTCGCTCACCGGCGCGCCGAACGCGGCCACGCCGTCGGTCGGGCAGTGGTGGGGCACCATCGAACAGCTCTACCTGTCCAACGCCGCCACGAACAGCCAGACCTCCACACGCGTGCTCCTCGATGAGCAGGTCTCGGACGAGCAGTGCTCCCTCGGCAAGTCTCTCACCCTGGCTCAGATCGAC…
LOC4336908	Os04g0604900	XTH16	XYLOGLUCAN ENDOTRANSGLUCOSYDASE/HYDROLASE 16	xyloglucan endotransglycosylase/hydrolase protein 8-like	F: TGAAGATCAACTGGACCGCC R: GTGGAATTCGGTAGCTGGCC	59	130	ATGGCGCGGCCGCTTGGGCAGCAGCAGGTTGGCGCGGCGGCGGCTCTGGTGATCGTCGTGGCGTGCTGCGTCGTCGCGGGGTGCTCGGGCGCGCGCGGGCGCGGTTTCCGCGAGGAATTCGACGTGATATGGGGCGAAGACCACGTGAGGGTCACCGACGAGGACGACGCGGCCACGCGGCAGGTGGTGGCGCTCACCCTCGACCAAGCCTCCGGCTCCGGGTTCCAGTCCAAGGACCAGTTCCTCTTCGGCGAGTTCAGCATGGAGATGAAGCTCGTCCCCGGCGAATCGCCCGGCACGGTCGCCACCTTCTACCTGACATCGGAGGGAGATGCGCACGACGAGATCGACTTCGAGTTCCTGGGGAACGTGAGCGGCGAGCCGTACGTGATGCACACC…
LOC4346394	Os09g0111100	CYCD3;1	CYCLIN-D3-1	cyclin-D3-2-like	F:GCGGCGAAAATAAGCGCAAG R: GGACGAGCTGTCGCAGCTGA	59	104	ATGGCTTTCGCCACGCTCTTTGACTCCCTCTACTGCCCCGAGGAGCACCTCGACCTCTTCCATGACACCGCCGCCGACGACGACCTCCACCTCGACCTTCACCTGCACCAACCCCCACCGCCGCCGCCGCTCCTCGACGACGACCTGCCTGCGCTGTTCCACGCGCTCAGGGGGAAGGAGGACCCGCTGCGCCCCGCCGCCGACGACGACGGCTACGGCGGGGTGTCTGCCCGGGAGGCGGCGGTCGGGTGGGCGCTGCGCGCCGTCGCGAGGCTCGGCTTCTCCGCGCTCACGGCCGCGCTCGCCGTCGCCTACCTCGACCGCTGCTTCCTCGGCGGCGCGCTCCGCCTCGGCGACCGCCCCTGGATGGCGCGCCTCGCCGCCGTCGCCTGCGTCGCG…
LOC4337274	Os04g0659300	RMC	ROOT MEANDER CURLING	cysteine-rich receptor-like protein kinase 6	F: GAACCTGGCCCTCACCCTCC R: TGGTGCCGCAGTCGTAGCAG	59	149	ATGGCGCGGTGCACTTTGCTCGTTCTCCTCGTGGCGGCGGCGGTGGCGGTCGTCCCGCTCGCCGCCGGCCAGCCGTGGGCTACCTGCGGCGACGGCACGTACGAGCAGGGGAGCGCCTACGAGAACAACCTCCTGAACCTGGCCCTCACCCTCCGCGACGGCGCCTCCTCCCAGGAGATCCTCTTCTCCACGGGCTCCAACGGCGCCGCCCCGAACACCGTCTACGGCCTCCTCCTCTGCCGCGGCGACATCTCCCGCGCCGCCTGCTACGACTGCGGCACCAGCGTGTGGAGGGACGCCGGGAGCGCGTGCCGCCGCGCCAAGGACGTCGCCCTCGTCTACAACGAGTGCTACGCCCGCCTCTCCGACAAGGACGACTTCCTCGCCGACAAGGTGGGG…
LOC4330873	Os02g0771600	ACO3	AMINOCYCLOPROPANE-1-CARBOXYLIC ACID OXIDASE 3	1-aminocyclopropane-1-carboxylate oxidase 1-like	F:TCGACCAGATCGACACGACA R:TGTGCAGTAGCAGCTCGACG	59	112	ATGGCTGGCGGCCTCACCTCTCCCCCCATCCGGCGGTCCTCTCCTCGGTGGAGCCTCGAATCGGACAACGTCGACCAGATCGACACGACAAGGAGGTTGAGGCAGATGTGGATCGAGGCGGCCTTCGTCGGGCCACCACTGCGGACGGGTCGAGGTGGCCGTCGTCGAGCTGCTACTGCACAGATGCTGAACCATGGCATCGCGCACGAGCTGATGGACGAGGTGGAGCGGGTGAGCAAGGCGCACTACGCCAACTGCCGGGAGGAGAAGTTCAAGGAGTTCGCGCGGCGGATGCTGGAGGCCGGCGAGAAGGGCGCCGACGTGAAGGGCATCGACTGGGAGAGCACCTTCTTCGTCCGCCACCGCCCCGTCTCCAACCTCGCCGACCTCCCCGACGTC…
LOC4337818	Os05g0149400	ACO5	AMINOCYCLOPROPANE-1-CARBOXYLIC ACID OXIDASE 5	1-aminocyclopropane-1-carboxylate oxidase	F:CCTCCACGACGACAACCAGT R:AGGTTCTCGTCCATGGCCTC	59	120	ATGGTTGTTCCGGTGATCGACTTCTCCAAGCTCGACGGCACCGCCGCAGAGAGGGCTGAGACGATGGCGCAGATCGACAATGGCTGCGAGGAGTGGGGATTCTTCCAGCTGGTGAACCATGGCGTCCCGAAGGAGCTTCTTGATCGGGTGAAGAAGGTGTGCTTGGAGAGCTACCGACTCCGGGAGGCGGCGTTCATGGAGTCGGAGCCGGTGAGGACGCTGGAGGGGCTCATGGCGGCGGAGCGGCGCGGCGAGGCGGCGGCGCCGGTGGACGACATGGACTGGGAGGACATCTTCTACCTCCACGACGACAACCAGTGGCCGTCGAACCCGCCGGAGTTCAAGGAGACGATGCGCGAGTACCGCGCGGCGCTGCGGGGGCTCGCCGAGAGGGTGATG…
LOC4334702	Os03g0836000	Actin3	Actin3	actin-3-like	F:TGGCACTGGAATGGTCAAGG R:GCCCATTCCAACCATGACAC	59	109	ATGGCCGACGGTGAGGATATCCAGCCACTTGTATGTGACAATGGCACTGGAATGGTCAAGGCTGGTTTTGCTGGTGATGATGCCCCCAGAGCAGTGTTCCCTAGTATAGTTGGTCGCCCTCGGCACACTGGTGTCATGGTTGGAATGGGCCAAAAAGATGCCTATGTGGGTGATGAGGCACAATCAAAAAGAGGTATCTTGACCTTGAAATACCCTATTGAGCATGGTATTGTGAACAACTGGGACGACATGGAGAAAATCTGGCATCACACCTTCTACAATGAGCTGCGTGTTGCTCCTGAGGAACATCCAATTTTGCTGACAGAAGCTCCTCTGAACCCAAAGGCTAACAGAGAGAAAATGACCCAAATCATGTTTGAGACATTCAATGCACCAGCA…
Note: LOC4334702 (Actin 3) was used as the reference gene
The gene names are primarily sourced from the rice gene database (http://www.ricedata.cn/gene/), whereas the gene names marked with an asterisk (*) are derived from NCBI (https://www.ncbi.nlm.nih.gov/).
Table S1-2. Information on genes selected for qRT-PCR analysis under treatments at 20°C, 25°C, 30°C, and 35°C
Gene Symbol	Gene ID	Gene Name	Description in RAP-DB	Description in Gene Bank	Primer Sequence (5' to 3')	Annealing (°C)	Size (bp)	Gene Sequence
LOC4324194	Os01g0580500	ACO7	AMINOCYCLOPROPANE-1-CARBOXYLIC ACID OXIDASE 7	1-aminocyclopropane-1-carboxylate oxidase 1-like	F:CAGCTCCACGAGGCCTGTAA R:CAGGTGCTCGTCGTAATGGC	59	117	ACTCGCTCATCGGAAGCAAATCATCTTCCTAGTGCATACAAGTTAGCTCATCATCAGCACTAGTACAGTACTACTAGACAGTTGTACGTACAAGTAGAAGTAGCTACCCAACCTTGGGAGAGATGGAGATTCCAGTGATTGATCTCAAGGGGCTCGCCGGCGGCGACGAAGAAAGGGAGCGCACCATGGCCCAGCTCCACGAGGCCTGTAAGGACTGGGGCTTCTTCTGGGTACGTGACAACACTTCAGAGATTATTTGAGAGTGGAACAGTTTTGAGCACCACTGTTTTTTTAGCAATGCAAAATCGAACAGGTCTAAATGTAACATGTTAGCAAAGTACTTGAAATTATAAATGTAGTAGTACAACTTTGATGCTAAATAATTAGATTATATTTTTT…
LOC4337818	Os05g0149400	ACO5	AMINOCYCLOPROPANE-1-CARBOXYLIC ACID OXIDASE 5	1-aminocyclopropane-1-carboxylate oxidase	F:CCTCCACGACGACAACCAGT R:AGGTTCTCGTCCATGGCCTC	59	120	ATCAACTGCAAGCTTACATCACACTAGCTAATTAGCTACTTACTCTTCTTCTTGCTAGCTTGCTAGCTTCTGCATTTAGACATTGCAAAATCTGAAAAAACTTGAGAAATTAACTAAACAAAATGGTTGTTCCGGTGATCGACTTCTCCAAGCTCGACGGCACCGCCGCAGAGAGGGCTGAGACGATGGCGCAGATCGACAATGGCTGCGAGGAGTGGGGATTCTTCCAGGTAGCTATACATAATCAGATCATGTGTCTTCTTAGTTGTTGCAGAGATCGAAAGTTATAAATCCTCAATTATATATAAGAATAGTTGGTGCAGTGATCGAAAGTTATTCTCGATGAATTTAAACATATCAACATATTGTGACCAAAATTATCCTTACATTTTTAAGAAT…
LOC4346629	Os09g0287000	ERF63	ETHYLENE RESPONSE FACTOR 63	ethylene-responsive transcription factor 1-like	F:GGACGCCACAACGAAGATGA R:ATCGTCCCTGCACCAGAAGG	59	147	ATGTGTGGAGGAGCACTGATCCCGAACGACTATGGCGACAAGCCGCCGCCGCCGCCGTCGGAGTCGTCGGAGTGGGACGCCACAACGAAGATGAAGAAGAAGAAGAAGCGTGGTGGCGGCGGCGACGACGACTGGGAGGCCGCCTTCCGGGAGTTCATCGCTGGCGACGACGACGACGACGACGGCGGCGTTTCCATGTTCCCTTCTGGTGCAGGGACGATGGAGACGACCACAGAGGTGGCGCCGGCGGCGGCGGTGGTGGAGAGGCCGCGGCGGCGGCGAAGGGTGAGGCGGAGCTACCCGTACCGCGGCGTCCGGCAGCGGCCGTGGGGGCGGTGGGCGTCGGAGATCCGCGACCCCGTCAAGGGCGCCCGCGTCTGGCTCGGCACCTTCGACACC…
LOC4343079	Os07g0437000	YUCCA6	YUCCA-LIKE GENE 6	probable indole-3-pyruvate monooxygenase YUCCA5	F:GACTCGAAGGTGCACGTCCT R:ATCCTGTCCACCACCCACAG	59	104	ATGGCGGCGAGGGTGGTGTGGGTGAACGGGCCGATCGTGGTCGGGGCGGGGCCGGCGGGGCTGTCGGTGGCGGCGTGCCTGCGCGAGCGCGGCGTGCCGTCGGTGCTCCTGGAGCGCGCCGACTGCATCGCGTCGCTGTGGCAGCGCCGCACCTACGACCGCCTCCGCCTCCACCTCCCCAAGCACTTCTGCGAGCTCCCCGGGATGCCCTTCCCGGACGGCTACCCGGAGTACCCCGACCGCCGCCAGTTCGTCGACTACCTCCAGGCCTACGCCGCGCGCGCCGGCGTCGAGCCGCGCTTCAACCAGTCCGTCACCTCCGCGCGCTACGACGACGCCGCGGGGCTCTGGCGCGTGCGCGCCGAGGACGTCAGCGTCGATGCGGCGGGCGACGTCACG…
LOC9268702	Os01g0924966	SAUR3	SMALL AUXIN-UP RNA 3	auxin-responsive protein SAUR72	F:CCTGATATCGAGGACGCTGG R:ACGTACACCGAGAAGCACCC	59	102	ATGGCGGCGGCGGCGAGGTCGTCGACGAAGGGGGTGAGGAGGACGAAGAGCCTGATATCGAGGACGCTGGAGCGGTGCAAGTCCGGGCTGAGCAGCGGCGGCGGCGGCAGGTCGGCGGCGGCGCCGGTGGCCGGGTGCTTCTCGGTGTACGTGGGGCCGGAGCGGGAGCGGTTCGTGGTGCGCACCGAGTACGCCAACCACCCGCTGTTCCGGCGGCTGCTCGACGACGCCGAGCGCGAGTACGGCTACGCGGCGCAGGGGCCCCTCGCGCTGCCGTGCGCCGTCGACGCGTTCCTCGACGTGCTCTGGCAGATGGAGCGCGACGGCTGCGGCGGCGGCGGCGACGACGACGACGACCTCTCCATCGGCGGCGGCGGCGCGGCGTCGCCGATATGCGGC…
LOC4330777	Os02g0756200	EXORDIUM*	Similar to Phi-1-like phosphate-induced protein	protein EXORDIUM	F:GCTGTACATACCTCCGGCGA R:GCGTGAATTTGCCGTACCAG	59	101	ATGGCTTCGTTTAGGCTAATGATAGCGGCGGTGTCTCTGAGCCTCGTGCAGCTCTCCATGGGGAGCAGGAGGTTAATGGAGCTGTACATACCTCCGGCGAGTGACCAGCTCACGTACCACCACGGCAGCGTGCTCAGTGGCGACATCCCGGTGTCCATCCTCTGGTACGGCAAATTCACGCCGACGCAGATGTCGATCATCGCCGACTTCGTCGTCTCGCTCACCGGCGCGCCGAACGCGGCCACGCCGTCGGTCGGGCAGTGGTGGGGCACCATCGAACAGCTCTACCTGTCCAACGCCGCCACGAACAGCCAGACCTCCACACGCGTGCTCCTCGATGAGCAGGTCTCGGACGAGCAGTGCTCCCTCGGCAAGTCTCTCACCCTGGCTCAGATCGAC…
LOC4336908	Os04g0604900	XTH16	XYLOGLUCAN ENDOTRANSGLUCOSYDASE/HYDROLASE 16	xyloglucan endotransglycosylase/hydrolase protein 8-like	F: TGAAGATCAACTGGACCGCC R: GTGGAATTCGGTAGCTGGCC	59	130	ATGGCGCGGCCGCTTGGGCAGCAGCAGGTTGGCGCGGCGGCGGCTCTGGTGATCGTCGTGGCGTGCTGCGTCGTCGCGGGGTGCTCGGGCGCGCGCGGGCGCGGTTTCCGCGAGGAATTCGACGTGATATGGGGCGAAGACCACGTGAGGGTCACCGACGAGGACGACGCGGCCACGCGGCAGGTGGTGGCGCTCACCCTCGACCAAGCCTCCGGCTCCGGGTTCCAGTCCAAGGACCAGTTCCTCTTCGGCGAGTTCAGCATGGAGATGAAGCTCGTCCCCGGCGAATCGCCCGGCACGGTCGCCACCTTCTACCTGACATCGGAGGGAGATGCGCACGACGAGATCGACTTCGAGTTCCTGGGGAACGTGAGCGGCGAGCCGTACGTGATGCACACC…
LOC4346394	Os09g0111100	CYCD3;1	CYCLIN-D3-1	cyclin-D3-2-like	F:GCGGCGAAAATAAGCGCAAG R: GGACGAGCTGTCGCAGCTGA	59	104	ATGGCTTTCGCCACGCTCTTTGACTCCCTCTACTGCCCCGAGGAGCACCTCGACCTCTTCCATGACACCGCCGCCGACGACGACCTCCACCTCGACCTTCACCTGCACCAACCCCCACCGCCGCCGCCGCTCCTCGACGACGACCTGCCTGCGCTGTTCCACGCGCTCAGGGGGAAGGAGGACCCGCTGCGCCCCGCCGCCGACGACGACGGCTACGGCGGGGTGTCTGCCCGGGAGGCGGCGGTCGGGTGGGCGCTGCGCGCCGTCGCGAGGCTCGGCTTCTCCGCGCTCACGGCCGCGCTCGCCGTCGCCTACCTCGACCGCTGCTTCCTCGGCGGCGCGCTCCGCCTCGGCGACCGCCCCTGGATGGCGCGCCTCGCCGCCGTCGCCTGCGTCGCG…
LOC4337274	Os04g0659300	RMC	ROOT MEANDER CURLING	cysteine-rich receptor-like protein kinase 6	F: GAACCTGGCCCTCACCCTCC R: TGGTGCCGCAGTCGTAGCAG	59	149	ATGGCGCGGTGCACTTTGCTCGTTCTCCTCGTGGCGGCGGCGGTGGCGGTCGTCCCGCTCGCCGCCGGCCAGCCGTGGGCTACCTGCGGCGACGGCACGTACGAGCAGGGGAGCGCCTACGAGAACAACCTCCTGAACCTGGCCCTCACCCTCCGCGACGGCGCCTCCTCCCAGGAGATCCTCTTCTCCACGGGCTCCAACGGCGCCGCCCCGAACACCGTCTACGGCCTCCTCCTCTGCCGCGGCGACATCTCCCGCGCCGCCTGCTACGACTGCGGCACCAGCGTGTGGAGGGACGCCGGGAGCGCGTGCCGCCGCGCCAAGGACGTCGCCCTCGTCTACAACGAGTGCTACGCCCGCCTCTCCGACAAGGACGACTTCCTCGCCGACAAGGTGGGG…
LOC4331146	Os03g0836000	Actin3	Actin3	actin-3-like	F:ATCAAAGCCTCGTGGTGGTG R:AATCCTGACGTGCTGAACCG	59	102	CTGACTTCGCCCGCCGACTCCGCCGCCGCCGCCGATCCCCATCCATCCCGCGAGCAGAGCAGGAGGAGCGCGAGCGCGAGCGCCGCCGTTCATCCGCCCTTCTGCTTCCGCCGCGTCGCATCCCGGTGAGCATCCCATCCTCTTCCTCATTCTCTCTCTCTACCCACGCATCTTCTCCAATTTTGCGTTAGCCCCTTGTTTCTCTTCTAGACATGGAAAGTTTTTCTCTTAATTTTGCTTAATCTAACTAATAGCAGTTTTTTTGTTCGCCAAAAAAGTTTTTGGGTTGAACTGAAACCCCCATGTCCCATTAGATCCGCCCCTGCGATATCGTCTTTGTGCGGATCTGCCATTTCGTCAGTGTTCTTAGCTTTTTTGGTTGATCTACTGAACCTCAGA…
Note: LOC4331146 (Actin3) was used as the reference gene
The gene names are primarily sourced from the rice gene database (http://www.ricedata.cn/gene/), whereas the gene names marked with an asterisk (*) are derived from NCBI (https://www.ncbi.nlm.nih.gov/).

## Sheet: Table S2
Table S2. Summary of transcriptome data
Table S2-1. Summary of transcriptome data for 12 samples under the treatment with 25°C, 35°C, 35°C+STS, and 35°C+AOA
Sample name	Total raw read (M)	Total clean read (M)	Total clean base (Gb)	Clean read Q20	Clean read Q30	Clean read ratio (%)	total mapping genome ratio(%)	uniquely mapping genome ratio(%)	total mapping gene ratio(%)	uniquely mapping gene ratio(%)
25°C 1	49.08	45.1	6.77	96.48	87.26	91.89	91.09	64.16	82.24	74.35
25°C 2	49.08	44.9	6.74	96.59	87.65	91.48	91.41	64.8	82.51	74.56
25°C 3	49.08	44.93	6.74	96.59	87.62	91.54	91.15	64.36	82.23	74.2
35°C 1	49.08	45.16	6.77	96.64	87.75	92.01	90.86	64.77	81.45	74.39
35°C 2	49.08	45.21	6.78	96.9	88.55	92.11	90.11	65.27	77.77	71.23
35°C 3	49.08	45.4	6.81	97.16	89.5	92.5	90.32	65.78	78.72	71.55
35°C+STS 1	49.08	45.4	6.81	96.98	88.85	92.5	90.45	64.96	79.08	71.43
35°C+STS 2	49.08	45.1	6.76	96.65	87.78	91.89	90.79	64.42	80.5	72.91
35°C+STS 3	49.08	45.29	6.79	96.77	88.16	92.28	90.78	64.79	80.89	73.16
35°C+AOA 1	49.08	45.3	6.8	96.84	88.31	92.3	90.69	65.42	79.95	73.02
35°C+AOA 2	49.08	45.38	6.81	96.88	88.47	92.46	90.24	65.24	79.91	73.02
35°C+AOA 3	49.08	45.5	6.83	96.94	88.75	92.71	90.63	65.31	80.64	73.63
Average	49.08	45.2225	6.78417	96.785	88.2208	92.1417	90.71	64.94	80.4908	73.1208
Minimum	49.08	44.9	6.74	96.48	87.26	91.48	90.11	64.16	77.77	71.23
Maximum	49.08	45.5	6.83	97.16	89.5	92.71	91.41	65.78	82.51	74.56
Note: Each group has three biological replicates.
Table S2-2. Summary of transcriptome data for 12 samples under treatments at 20°C, 25°C, 30°C, and 35°C
Samples	Total raw read (M)	Total clean read (M)	Total clean base (Gb)	Clean read Q20	Clean read Q30	Clean read ratio (%)	total mapping genome ratio(%)	uniquely mapping genome ratio(%)	total mapping gene ratio(%)	uniquely mapping gene ratio(%)
20°C 1	47.33	45.27	6.79	97.43	93.08	95.66	90.64	87.96	80.39	73.44
20°C 2	45.57	44.12	6.62	97.43	93.04	96.81	89.98	87.32	79.73	72.95
20°C 3	47.33	45.42	6.81	97.57	93.47	95.97	90.61	88	80.09	73.25
25°C 1	47.33	45.34	6.8	97.47	93.19	95.79	90.62	88.06	80.28	73.5
25°C 2	49.08	45.37	6.81	97.49	93.3	92.45	89.71	87.18	78.63	71.73
25°C 3	45.57	44	6.6	97.56	93.41	96.55	90.84	88.17	80.55	73.66
30°C 1	45.57	43.87	6.58	97.41	93.03	96.25	90.89	88.47	80.48	73.98
30°C 2	47.33	45.04	6.76	97.41	93.06	95.17	90.25	87.88	79.68	73.3
30°C 3	47.33	45.3	6.8	97.53	93.36	95.72	90.56	88.12	80.08	73.6
35°C 1	47.33	45.05	6.76	97.28	92.75	95.18	89.94	87.68	78.99	73.03
35°C 2	47.33	45.17	6.78	97.36	92.99	95.45	90.03	87.73	79.29	73.26
35°C 3	47.33	44.71	6.71	97.36	92.99	94.48	89.26	87	78.4	72.36
Average	47.0358	44.8883	6.735	97.4417	93.1392	95.4567	90.28	87.7975	79.7158	73.1717
Minimum	45.57	43.87	6.58	97.28	92.75	92.45	89.26	87	78.4	71.73
Maximum	49.08	45.42	6.81	97.57	93.47	96.81	90.89	88.47	80.55	73.98
Note: Each group has three biological replicates.

## Sheet: Table S3
Table S3. Expression profiles of all individual genes in 12 samples under treatments of 25°C, 35°C, 35°C+STS, and 35°C+AOA
Gene Symbol	fpkm 25°C 1	fpkm 25°C 2	fpkm 25°C 3	fpkm 35°C 1	fpkm 35°C 2	fpkm 35°C 3	fpkm 35°C+STS 1	fpkm 35°C+STS 2	fpkm 35°C+STS 3	fpkm 35°C+AOA 1	fpkm 35°C+AOA 2	fpkm 35°C+AOA 3	average fpkm 25°C	average fpkm 35°C	average fpkm 35°C+STS	average fpkm 35°C+AOA	log2FC (25°C vs 35°C)	Q-Value (25°C vs 35°C)	log2FC (35°C vs 35°C+STS)	Q-Value (35°C vs 35°C+STS)	log2FC (35°C vs 35°C+AOA)	Q-Value (35°C vs 35°C+AOA)
LOC107277826	0	0	0	0	0	0.05	0	0	0.05	0	0	0	0	0.017	0.017	0	NA	NA	-0.02975	0.99912	NA	NA
LOC4350396	0.22	0.28	0.24	0.93	2.25	1.41	0.11	0.33	0.2	0.98	1.75	1.79	0.247	1.53	0.213	1.507	2.73942	0	-2.87045	0	-0.03162	0.89225
LOC9267669	0.57	0.58	0.67	2.17	4.17	2.33	3.01	2.48	2.46	3.83	3.94	3	0.607	2.89	2.65	3.59	2.20134	0	-0.04951	0.68698	0.37825	8e-05
LOC4324936	4.95	4.22	3.86	5.46	4.74	4.33	3.26	4.4	4.65	5.38	6.19	5.38	4.343	4.843	4.103	5.65	0.16712	0.02346	-0.24241	0.0014	0.21552	0.00186
LOC4349394	11.45	11.56	12.26	10.27	12.71	11.82	12.61	12.27	12.03	12.04	11.11	11.72	11.757	11.6	12.303	11.623	-0.00951	0.87211	0.08068	0.1479	-0.00236	0.97848
LOC4335696	58.73	56.19	55.22	76.33	98	85.23	85.04	79.13	83.16	71.37	65.91	62.97	56.713	86.52	82.443	66.75	0.59983	0	-0.07818	0.00011	-0.36002	0
LOC4338154	3.36	3.21	3.15	5.01	1.05	4.27	0.76	1.66	1.05	1.79	3.48	4.35	3.24	3.443	1.157	3.207	0.11382	0.42435	-1.66347	0	-0.13065	0.37194
LOC4329409	7.26	7.12	7.63	8.56	7.29	5.98	8.05	8.19	8.43	10.68	13.96	11.91	7.337	7.277	8.223	12.183	-0.01001	0.8611	0.17286	0.0006	0.74063	0
LOC4334336	7.66	7.43	7.03	13.58	24.12	17.9	9.32	9.92	8.79	21.24	20.39	19.75	7.373	18.533	9.343	20.46	1.12512	0	-1.03909	0	0.15756	0.00094
LOC107275814	6.68	8.33	8.03	6.56	5.59	7.62	13.19	13.13	14.89	4.97	3.41	3.12	7.68	6.59	13.737	3.833	-0.22775	0.00721	1.05535	0	-0.79995	0
LOC4351228	119.43	119.35	124.35	92.44	81.41	94.55	104.59	118.45	119.3	88.27	90.78	83.63	121.043	89.467	114.113	87.56	-0.41081	0	0.33791	0	-0.04733	0.09004
LOC107278015	0.32	0.36	0.18	0.18	1.05	0.5	1.24	0.65	0.6	0.74	0.42	0.55	0.287	0.577	0.83	0.57	1.00636	0.01561	0.53004	0.12087	-0.01984	0.96984
LOC4336624	8.51	7.88	7.91	9.38	8.4	6.98	7.91	8.71	7.79	7.35	8.7	7.46	8.1	8.253	8.137	7.837	0.00084	0.9905	0.0783	0.28969	0.10984	0.11365
LOC4329484	70.61	75.75	74.22	52.22	60.31	52.76	72.13	64.19	66.19	36.05	29.11	31.23	73.527	55.097	67.503	32.13	-0.53526	0	0.23298	0	-0.7275	0
LOC9268920	4.61	3.6	3.95	3.72	5.26	4.7	4.86	5.17	5.18	4.53	4.32	4.36	4.053	4.56	5.07	4.403	0.18295	0.07395	0.14941	0.14609	-0.05707	0.60795
LOC107275986	0.13	0.26	0.2	0.55	0.48	0.59	0.3	0.63	0.26	0.26	0.2	0.33	0.197	0.54	0.397	0.263	1.48962	0.00012	-0.46018	0.19887	-1.04959	0.00436
LOC4336157	22.89	22.1	23.72	19.52	22.64	22.6	22.71	22.92	22.92	21.48	20.7	21.19	22.903	21.587	22.85	21.123	-0.06959	0.13613	0.0748	0.12712	-0.04052	0.42437
LOC107276704	11.69	11.9	11.94	8.41	2.87	5.6	8.62	11.22	10.72	1.01	0.95	1.06	11.843	5.627	10.187	1.007	-1.05426	0	0.84186	0	-2.49901	0
LOC107280275	0.22	0.16	0.05	0.11	0.43	0.32	0.27	0.33	0.16	0.35	0.27	0.43	0.143	0.287	0.253	0.35	1.01385	0.12018	-0.17705	0.79341	0.29507	0.60711
LOC4349498	11.04	11.36	6.95	3.24	11.36	6.49	3.7	3.44	3.41	7.84	8	8.19	9.783	7.03	3.517	8.01	-0.46249	0	-0.99906	0	0.18508	0.06864
LOC4328423	51.14	52.05	49.56	48.95	34.48	35.77	35.02	39.1	46.75	35.95	41.72	38.92	50.917	39.733	40.29	38.863	-0.34634	0	0.01356	0.60926	-0.04053	0.08747
LOC4334611	37.23	31.87	32.83	18.75	17.03	23.98	23.93	22.67	26.88	20.65	22.07	21.86	33.977	19.92	24.493	21.527	-0.74522	0	0.28536	0	0.09667	0.08328
LOC4349347	389.26	374.98	412.43	362.27	387.67	377.47	284.13	284.89	279.83	469.2	449.6	432.36	392.223	375.803	282.95	450.387	-0.03393	0.0169	-0.42263	0	0.24456	0
LOC4340724	12.06	12.34	13.27	11.16	13.62	11.47	8.22	13.36	12.06	9.11	7.58	8.52	12.557	12.083	11.213	8.403	-0.06427	0.19189	-0.09645	0.06421	-0.52309	0
LOC4332686	3.47	4.12	3.81	7.55	7.3	6.65	6.11	5.36	5.51	9.61	12.16	7.43	3.8	7.167	5.66	9.733	0.94487	0	-0.35277	0.0012	0.43193	0
LOC107277201	1.65	1.86	1.46	6.27	10.35	6.66	6.26	4.86	5.59	10.22	7.99	10.9	1.657	7.76	5.57	9.703	2.2482	0	-0.48312	0	0.31468	0.00047
LOC4345411	63.85	61.54	55.13	72.6	62.28	60.28	50.63	59.6	57.67	73.56	78.42	73.96	60.173	65.053	55.967	75.313	0.1453	7e-05	-0.23354	0	0.1911	0
LOC4327211	10.62	10.06	9.86	10.4	11.78	10.16	12.29	11.19	11.91	9.45	7.93	6.87	10.18	10.78	11.797	8.083	0.09389	0.11757	0.12542	0.03452	-0.42278	0
LOC9268054	0.22	0.74	0.37	0.11	0.63	0.4	1.45	0.94	0.58	0.21	0.11	0.1	0.443	0.38	0.99	0.14	-0.16594	0.80958	1.38027	0.00835	-1.46212	0.09018
LOC4339189	4.27	4.33	4.25	6.39	8.8	7.54	5.97	5.99	5.54	6.16	5.69	6.38	4.283	7.577	5.833	6.077	0.84276	0	-0.38411	6e-05	-0.32796	0.0005
LOC4336028	0.41	0.65	2.02	0.29	0.3	0.39	0.42	0.46	0.29	10.8	16.87	11.8	1.027	0.327	0.39	13.157	-1.63221	0	0.25565	0.59345	5.31614	0
LOC4344266	0.71	1.68	0.84	1.16	0	6.38	0.13	0.13	0	0.32	0.66	0.32	1.077	2.513	0.087	0.433	1.28362	0	-4.89804	0	-2.58055	0
LOC9271688	0.03	0	0.03	0.03	0.09	0.03	0	0	0	0	0	0	0.02	0.05	0	0	1.36677	0.27383	-3.33733	0.06239	-3.34177	0.05636
LOC4332412	10.32	10.84	10.56	14.46	10.91	10.16	5.96	9.12	9.65	10.98	12.05	10.67	10.573	11.843	8.243	11.233	0.17588	0.00091	-0.53492	0	-0.08975	0.10269
LOC4350919	61.67	60.21	60.81	53.89	61.61	63.78	73.17	66.1	70.74	55.4	55.81	54.76	60.897	59.76	70.003	55.323	0.00464	0.92142	0.21309	0	-0.13304	0.00104
LOC4333407	4.8	6.16	6.28	28.45	2.82	9.63	9.12	10.71	11.19	1.6	2.68	4.41	5.747	13.633	10.34	2.897	1.2851	0	-0.4268	0	-2.26333	0
LOC4340541	0	0	0	0.11	0	0	0	0.28	0	0.82	0.44	0.53	0	0.037	0.093	0.597	NA	NA	1.36414	0.45664	4.02779	7e-05
LOC4328753	115.52	114.45	115.84	104.89	74.78	76.37	89.01	89.22	98.01	81.78	82.94	76.31	115.27	85.347	92.08	80.343	-0.4111	0	0.09723	7e-05	-0.10229	4e-05
LOC107277011	20.51	20.21	20.64	20.01	18.84	15.94	15.6	18.66	19.55	20.73	22.6	20.87	20.453	18.263	17.937	21.4	-0.155	0	-0.02981	0.43369	0.22335	0
LOC4332682	13.13	12.96	13.88	13.36	13.43	12.27	15.41	13.42	17.4	12.76	12.87	12.43	13.323	13.02	15.41	12.687	0.01791	0.84237	0.22834	0.00421	-0.05369	0.554
LOC4347030	6.01	5.13	5.48	7.3	9.28	6.83	6.83	6.54	5.31	9.38	10.49	8.37	5.54	7.803	6.227	9.413	0.74848	0	-0.33233	0	0.33332	0
LOC4332650	7.01	7.02	6.82	8.06	7.46	7.69	6.56	7.57	7.89	9.74	10.85	10.23	6.95	7.737	7.34	10.273	0.17052	0.02065	-0.08367	0.29614	0.39926	0
LOC4351978	48.36	49.08	47.4	67	63.13	71.28	64.81	76.36	70.34	59.23	59.11	58.17	48.28	67.137	70.503	58.837	0.50446	0	0.06137	0.02208	-0.20151	0
LOC4348475	450.89	436.81	425.19	360.99	462.19	457.03	469.54	353.32	387.07	307.49	269.29	292.98	437.63	426.737	403.31	289.92	0.0108	0.5617	-0.10224	0	-0.58483	0
LOC4333056	3.32	3.01	2.08	2.19	1.61	3.96	3.96	4.37	3.54	1.56	1.33	1.68	2.803	2.587	3.957	1.523	-0.02443	0.94206	0.56166	0.02938	-0.82129	0.00997
LOC112937474	0	0	0	0	0	0	0	0	0	0.06	0.06	0	0	0	0	0.04	NA	NA	NA	NA	NA	NA
LOC107278481	0.3	0.1	0.1	0.76	0.58	0.86	0.25	0.26	0.1	1.07	1.39	0.96	0.167	0.733	0.203	1.14	2.14917	0	-1.8567	4e-05	0.61999	0.03818
LOC4338253	9.01	9.34	8.79	12.94	14.58	13.46	13.18	14.47	15.91	20.43	23.36	21.65	9.047	13.66	14.52	21.813	0.61542	0	0.08651	0.16932	0.6653	0
LOC9266486	16.81	14.16	15.07	14.68	12.1	13.18	18.3	15.36	10.93	12.24	14.02	10.45	15.347	13.32	14.863	12.237	-0.13141	0.27369	0.12501	0.33252	-0.16852	0.19051
LOC4347194	3.09	3.24	2.71	1.56	4.2	3.01	3.49	2.3	2.9	2.91	2.14	2.59	3.013	2.923	2.897	2.547	-0.02916	0.85852	-0.0154	0.94134	-0.20364	0.20592
LOC4337908	4.86	4.92	4.16	5.56	8.34	10.3	8.99	7.4	6.83	9.13	8.69	9.04	4.647	8.067	7.74	8.953	0.8159	0	-0.06923	0.4799	0.13881	0.10768
LOC4337710	0.12	0.21	0.03	0.03	0.34	0.18	0.3	0.27	0.27	0.15	0.12	0.18	0.12	0.183	0.28	0.15	0.6298	0.27696	0.62203	0.20434	-0.28287	0.63068
LOC107278444	0.07	0.07	0.02	0.07	0	0.1	0.07	0.05	0.02	0	0	0	0.053	0.057	0.047	0	0.04484	0.96735	-0.23779	0.81764	-3.82719	0.01607
LOC4330426	28.82	27.68	26.66	31.29	28.35	24.97	23.45	22.89	28.27	19.39	19.7	14.96	27.72	28.203	24.87	18.017	0.03268	0.20722	-0.18507	0	-0.65261	0
LOC4336345	2.86	2.32	2.58	4.18	3.38	3.35	3.21	3.56	3.44	4.31	5.66	4	2.587	3.637	3.403	4.657	0.44114	0	-0.14611	0.11988	0.33945	2e-05
LOC9272272	8.62	8.61	7.23	11.41	10.61	8.37	6.65	8.74	8.31	11.26	12.05	11.11	8.153	10.13	7.9	11.473	0.29566	0	-0.34576	0	0.17887	0.00013
LOC4330832	0	0	0.04	0	0	0	0.04	0.08	0.16	0	0	0.04	0.013	0	0.093	0.013	NA	NA	3.79196	0.01915	NA	NA
LOC9272599	1.18	1.15	1.13	1.08	1.04	0.77	0.72	1.26	1.43	0.77	0.91	0.82	1.153	0.963	1.137	0.833	-0.24467	0.22612	0.22972	0.2901	-0.22075	0.33474
LOC4339694	8.2	8.04	8.45	14.8	16.09	14.38	19.25	17.73	15.68	14.39	16.96	16.17	8.23	15.09	17.553	15.84	0.89008	0	0.21261	8e-05	0.06148	0.29592
LOC4349037	3.05	2.45	2.85	3.99	3.34	3.12	4.15	3.95	4.45	5.06	4.94	5.3	2.783	3.483	4.183	5.1	0.34193	0.00379	0.2543	0.02264	0.53816	0
LOC107278021	1.66	1.37	1.8	0.25	0.18	0.2	0.31	0.62	0.23	0	0	0	1.61	0.21	0.387	0	-2.90158	0	0.72157	0.07528	-5.6048	0
LOC9266216	0	0.34	0.32	2.11	3.42	2.73	2.14	3.12	2	10.09	11.36	9.65	0.22	2.753	2.42	10.367	3.66114	0	-0.19495	0.26942	1.90131	0
LOC4338296	38.25	37.63	43.06	26.52	22.86	25.46	21.21	24.34	20.5	16.95	19.9	18.99	39.647	24.947	22.017	18.613	-0.64186	0	-0.19443	0.00033	-0.43944	0
LOC4334906	80.93	87.34	79.05	87.41	76.09	76.35	44.62	44.96	49.85	62.01	49.62	54.43	82.44	79.95	46.477	55.353	-0.00518	0.90055	-0.80177	0	-0.55359	0
LOC4329680	39.63	41.58	41.66	59.99	50.71	53.43	68.27	63.32	61.25	42.78	38.45	41.87	40.957	54.71	64.28	41.033	0.47637	0	0.20405	7e-05	-0.45016	0
LOC4344725	0.25	0.15	0.2	0.34	0	0.15	0.35	0.25	0.25	0.15	0.1	0	0.2	0.163	0.283	0.083	-0.2182	0.75691	0.75014	0.24624	-1.01984	0.23058
LOC4349631	0.14	0.14	0.27	0.14	0.57	0.32	0.09	0.09	0.18	0.44	0.46	0.32	0.183	0.343	0.12	0.407	0.92193	0.08728	-1.47745	0.0148	0.24657	0.61165
LOC4338575	6.2	6.4	5.96	7.42	5.89	5.4	7.64	6.19	6.17	6.17	5.32	4.81	6.187	6.237	6.667	5.433	0.03219	0.7408	0.08515	0.38678	-0.21248	0.02477
LOC4348013	0.78	0.74	0.74	1.27	1.33	1.43	1.18	1.01	1.71	1.22	1.12	1.63	0.753	1.343	1.3	1.323	0.85219	0.0002	-0.05457	0.8275	-0.03278	0.89334
LOC4338201	7.41	7.08	5.72	10.97	10.54	9.74	4.78	5.13	4.7	8.63	4.2	7.62	6.737	10.417	4.87	6.817	0.65431	0	-1.0861	0	-0.62454	0
LOC112938193	0	0	0.08	0	0	0	0	0	0	0	0	0	0.027	0	0	0	NA	NA	NA	NA	NA	NA
LOC4324339	2.33	2.21	2.73	2.84	3.37	4.59	3.8	4.29	2.96	2.63	3.55	3.09	2.423	3.6	3.683	3.09	0.58828	0.00321	0.03632	0.87388	-0.24751	0.21713
LOC4341992	1.61	2.08	2	3.72	5.55	3.56	3.41	3.38	3.67	4.9	4.09	3.31	1.897	4.277	3.487	4.1	1.18173	0	-0.29616	0.00497	-0.06613	0.54617
LOC4346318	67.41	65.81	60.77	46	48.34	41.08	55.91	47.48	65.18	44.17	50.31	43.52	64.663	45.14	56.19	46	-0.44037	0	0.31388	0	-0.02422	0.44482
LOC4329717	1.19	1.49	1.28	0.41	0.64	0.72	0.88	0.42	0.36	6.43	8.01	6.32	1.32	0.59	0.553	6.92	-1.13449	0.00012	-0.10286	0.822	3.53655	0
LOC4331822	1.51	2.02	1.09	5.76	12.27	8.91	0.52	0.95	1.36	4.04	3.97	4.55	1.54	8.98	0.943	4.187	2.55087	0	-3.24841	0	-1.10334	0
LOC4324072	0.17	0.17	0.17	0.12	0	0	0	0	0	0.12	0.18	0.06	0.17	0.04	0	0.12	-2.12509	0.04253	NA	NA	1.56512	0.19576
LOC4332627	5.42	5.48	3.06	5.99	5.77	6.52	3.97	3.9	3.8	4.32	3.06	3	4.653	6.093	3.89	3.46	0.39958	0	-0.65603	0	-0.82291	0
LOC9266884	0	0.03	0	0	0.06	0.03	0.03	0	0	0.03	0	0	0.01	0.03	0.01	0.01	1.6298	0.33725	-1.60036	0.37788	-1.6048	0.35916
LOC4339039	2.29	2.77	2.43	8.42	11.04	13.61	7.7	3.92	4.73	11.54	9.17	10.13	2.497	11.023	5.45	10.28	2.19116	0	-1.03754	0	-0.13014	0.26511
LOC107277259	1.87	2.5	2.54	5.34	4.03	3.13	4.26	4.42	5.3	5.65	6.78	7.1	2.303	4.167	4.66	6.51	0.94737	0	0.13544	0.25155	0.66982	0
LOC4325933	15.39	13.89	15.38	18	19.71	17.59	12.65	14.97	13.42	17.02	14.75	12.59	14.887	18.433	13.68	14.787	0.29995	0	-0.42491	0	-0.32866	0
LOC4349196	0	0	0	0.11	0.05	0.05	0.05	0.05	0.05	6.61	9.7	9.41	0	0.07	0.05	8.573	NA	NA	-0.43043	0.75485	6.89305	0
LOC9271401	6.71	9.18	12.59	9.46	4.57	6.14	8.64	11.05	10.09	1.24	1.52	0.45	9.493	6.723	9.927	1.07	-0.45575	3e-05	0.53672	0	-2.6859	0
LOC9271026	2.66	2.4	2.72	1.93	2.61	1.82	4.25	3.67	3.98	1.73	1.26	1.43	2.593	2.12	3.967	1.473	-0.27563	0.05874	0.89783	0	-0.53337	0.00141
LOC112939663	15.75	17.37	15.2	17.8	17.88	15.54	16.64	17.71	17.45	20.97	23.54	22.42	16.107	17.073	17.267	22.31	0.10373	0.05038	-0.01978	0.7508	0.33683	0
LOC4336696	28.35	28.02	26.59	33.07	40.14	39.66	46.98	38.45	33.99	37.48	37.76	39.86	27.653	37.623	39.807	38.367	0.47292	0	0.06824	0.16801	0.01193	0.82468
LOC4339806	8.51	7.86	9.16	6.15	6.48	8.04	9.13	9.11	7.94	4.01	3.95	4.01	8.51	6.89	8.727	3.99	-0.29102	2e-05	0.3336	0	-0.79507	0
LOC4346313	15.55	14.92	14.41	15.85	20.94	14.45	24.89	20.05	20.5	17.72	14.98	11.36	14.96	17.08	21.813	14.687	0.23133	0.00822	0.33755	2e-05	-0.24034	0.00701
LOC4336396	69.7	68.11	72.83	63.94	50.87	57.5	70.82	85.05	77.99	41.17	38.63	37.83	70.213	57.437	77.953	39.21	-0.27735	0	0.42673	0	-0.56072	0
LOC4350655	19.76	20.77	20.08	14.8	12.38	14.43	15.15	18.43	17.94	16	16.1	14.64	20.203	13.87	17.173	15.58	-0.52546	0	0.29887	0	0.15618	0.00324
LOC4342219	194.61	192.54	181.38	102.5	137.85	150.6	215.43	151.78	170.01	109.89	88.49	88.62	189.51	130.317	179.073	95.667	-0.49767	0	0.43949	0	-0.47099	0
LOC107280262	0	0	0.09	0	0	0	0	0	0	0	0	0	0.03	0	0	0	NA	NA	NA	NA	NA	NA
LOC107276035	0.1	0.1	0	0.16	0.28	0.33	0.67	0.44	0.2	0.3	0.37	0.13	0.067	0.257	0.437	0.267	1.98344	0.00135	0.74644	0.07016	0.04156	0.94312
LOC4337047	15.4	18.08	19.51	19.97	17.58	17.51	16.22	17.78	19.39	20.23	21.04	18.52	17.663	18.353	17.797	19.93	0.12509	0.02645	0.03759	0.55117	0.11442	0.03865
LOC9268660	5.24	5.67	5.19	9.19	12.76	9.21	7.94	9.37	9.68	12.21	13.44	10.67	5.367	10.387	8.997	12.107	0.97766	0	-0.20629	3e-05	0.21849	0
LOC4349002	13.08	11.45	13.03	14.38	21.99	22.43	30.59	22.27	18.7	15.02	11.34	13.18	12.52	19.6	23.853	13.18	0.68263	0	0.26781	0.00011	-0.5925	0
LOC107277801	0.1	0.1	0.07	0.69	1.9	1.14	0.44	0.42	0.14	2.31	1.38	1.96	0.09	1.243	0.333	1.883	3.76887	0	-1.90765	0	0.60597	6e-05
LOC4342225	35.41	32.9	32.26	47.81	37.95	34.89	46.04	46.42	54.25	58.59	60.14	53.4	33.523	40.217	48.903	57.377	0.28024	0	0.27326	0	0.50125	0
LOC4344076	3.57	3.3	2.85	4.4	5.52	4.68	4.78	4.78	5.09	6.4	6.44	6.26	3.24	4.867	4.883	6.367	0.59696	0	0.00111	0.99922	0.38321	0
LOC4343405	2.26	1.99	1.87	4.49	3.59	2.59	2.58	4.38	3.75	3.4	3.91	3.48	2.04	3.557	3.57	3.597	0.81257	0	-0.00026	0.99741	0.00863	0.92515
LOC4340441	0.41	0.51	0.2	1.9	3.34	2.05	1	0.62	0.41	2.43	2.17	2.01	0.373	2.43	0.677	2.203	2.75533	0	-1.86339	0	-0.1674	0.5593
LOC9267722	0.02	0	0.07	0	0	0	0	0	0.02	0	0	0	0.03	0	0.007	0	NA	NA	NA	NA	NA	NA
LOC9269734	4.19	4.96	4.93	28.05	37.13	35.85	15.13	18.53	21.64	54.45	49.3	55.64	4.693	33.677	18.433	53.13	2.86219	0	-0.87731	0	0.64974	0
LOC4351603	5.47	4.96	4.71	8.93	6.93	5.91	5.61	5.41	6.8	5.21	5.46	4.56	5.047	7.257	5.94	5.077	0.52316	0	-0.29255	0	-0.51706	0
LOC4332956	79.93	83.88	93.72	75.89	84.13	78.49	93.93	98.25	104.63	136.05	147.65	133	85.843	79.503	98.937	138.9	-0.09441	5e-05	0.31095	0	0.79274	0
LOC107281262	0.07	0.14	0.11	0.11	0.19	0.25	0.14	0.11	0.14	0.32	0.15	0.21	0.107	0.183	0.13	0.227	0.7818	0.22772	-0.46286	0.49623	0.3212	0.57964
LOC4330101	0.02	0.06	0	0.08	0	0.04	0	0	0	0.02	0.02	0.08	0.027	0.04	0	0.04	0.09998	0.94032	NA	NA	-0.01984	0.99468
LOC4346098	13.37	15	13.39	20.79	19.62	19.91	21.75	18.18	19.47	21.66	21.25	21.02	13.92	20.107	19.8	21.31	0.55924	0	-0.03621	0.61989	0.06627	0.31113
LOC4349929	196	197.24	174.21	114.79	135.97	128.05	160.58	139.46	146.83	107.44	82.59	98.05	189.15	126.27	148.957	96.027	-0.54129	0	0.21959	0	-0.41827	0
LOC4347964	1.1	0.69	0.19	0.03	0.03	0.14	0	0.03	0.03	0.11	0.11	0.08	0.66	0.067	0.02	0.1	-3.35726	0	-1.82275	0.12292	0.63224	0.4192
LOC112936213	0.09	0.09	0	0.18	0.09	0	0	0.09	0	0.18	0	0	0.06	0.09	0.03	0.06	0.6346	0.66722	-1.61966	0.37312	-0.6096	0.69179
LOC107277700	0	0	0	0	0	0	0	0	0	0	0.06	0	0	0	0	0.02	NA	NA	NA	NA	3.30209	0.0595
LOC4350542	0	0	0	0	0	0	0	0.05	0	0.05	0	0	0	0	0.017	0.017	NA	NA	NA	NA	NA	NA
LOC4340662	9.62	10.9	7.7	8.61	15.81	11.19	18.01	16.33	16.67	18.74	15.06	13.37	9.407	11.87	17.003	15.723	0.35006	0	0.51488	0	0.3991	0
LOC4349127	198.51	189.58	190.81	263.63	281.77	264.98	225.71	213.78	214.06	353.32	412.29	366.6	192.967	270.127	217.85	377.403	0.53226	0	-0.33219	0	0.45394	0
LOC112936063	0.18	0.12	0.35	0	0.06	0	0	0	0	0	0	0	0.217	0.02	0	0	-3.41459	0.00347	NA	NA	NA	NA
LOC9270215	0.12	0.27	0.12	0.04	0.04	0.04	0.04	0.04	0.08	0.47	0.08	0.59	0.17	0.04	0.053	0.38	-2.07064	0.01577	0.39964	0.77302	3.25318	0
LOC9266404	3.67	3.57	3.38	6.82	3.32	2.95	1.81	3.59	3.42	4.23	6.77	5.25	3.54	4.363	2.94	5.417	0.32731	0.00044	-0.62211	0	0.25877	0.00262
LOC4348590	12.43	13.35	12.05	21.37	22.79	25.76	35.2	23.73	30.82	15.82	14.36	11.09	12.61	23.307	29.917	13.757	0.93203	0	0.33889	0	-0.78968	0
LOC4325774	13.83	15.05	13.28	21.77	30.8	25.41	19.6	19.36	15.44	22.1	22.39	21.68	14.053	25.993	18.133	22.057	0.89392	0	-0.52402	0	-0.24868	0
LOC112936201	0.02	0.06	0.14	0.02	0.04	0.02	0.15	0.14	0.12	0.06	0.14	0.08	0.073	0.027	0.137	0.093	-1.41459	0.09415	2.30653	0.0015	1.78752	0.025
LOC4341335	7.65	8.22	6.52	4.23	7.17	7.12	12.61	8.97	7.09	13.75	9.65	12.14	7.463	6.173	9.557	11.847	-0.26593	0.00073	0.63547	0	0.93729	0
LOC4324341	36.1	41.66	32.21	37.24	38.85	34.17	27.17	32.28	33.52	32.98	34.78	30.98	36.657	36.753	30.99	32.913	0.05049	0.42415	-0.26876	2e-05	-0.18709	0.00251
LOC4333735	44.68	43.7	45.38	33.88	26.39	26.34	28.7	32.25	33.55	22.98	24.78	23.34	44.587	28.87	31.5	23.7	-0.61617	0	0.11962	1e-05	-0.29247	0
LOC4332471	2.08	2.59	1.94	3.27	4.28	2.71	3.54	2.49	2.42	2.85	3.79	2.44	2.203	3.42	2.817	3.027	0.56156	1e-05	-0.28106	0.02417	-0.19332	0.11586
LOC4333749	940.78	894.18	924.27	668.68	713.62	769.43	1007.94	948.05	983.51	708.05	696.7	652.02	919.743	717.243	979.833	685.59	-0.3116	0	0.42724	0	-0.09389	0
LOC4347651	23.38	24.43	22.38	24.03	25.2	22.79	23.42	26.73	26.3	27.3	26.11	24.58	23.397	24.007	25.483	25.997	0.05117	0.22588	0.07992	0.05879	0.10622	0.00869
LOC4324499	0.5	0.54	0.45	1.72	1.13	1.08	0.64	0.46	0.44	1.55	1.89	1.47	0.497	1.31	0.513	1.637	1.40872	0	-1.35582	0	0.31854	0.00557
LOC4329853	22.3	21.66	24.44	27.39	22.08	23.18	30.12	32.38	31.71	20.11	18.22	15.9	22.8	24.217	31.403	18.077	0.10658	0.02135	0.36364	0	-0.43621	0
LOC112936093	0.06	0.24	0.15	1.14	0.72	0.61	0	0	0	0.06	0.15	0.15	0.15	0.823	0	0.12	2.4778	0	-7.35525	0	-2.77473	0
LOC4344611	11.82	11.05	11.75	12.19	11.57	9.58	9.62	10.59	12.46	12.52	14.53	13.66	11.54	11.113	10.89	13.57	-0.06188	0.18828	-0.02845	0.60102	0.27308	0
LOC4350437	11.02	10.76	10	8.53	9.07	9.99	12.58	10.06	11.39	10.1	10.76	9.19	10.593	9.197	11.343	10.017	-0.18172	0.01639	0.29519	8e-05	0.10861	0.17853
LOC4351534	8.24	5.56	7.07	5.28	4.82	4.4	7.14	5.27	6.5	5.28	4.89	4.47	6.957	4.833	6.303	4.88	-0.49475	1e-05	0.36661	0.00174	0.00195	0.99529
LOC4332518	5.9	5.98	6.58	7.67	7.57	6.7	6.51	6.65	7.31	8.06	8.68	8.42	6.153	7.313	6.823	8.387	0.26169	0.00023	-0.10599	0.16216	0.18974	0.00487
LOC4331789	15.48	15.07	15.19	15.35	17.25	18.58	19.5	17.28	17.85	10.19	8.29	7.22	15.247	17.06	18.21	8.567	0.18323	0.00239	0.08421	0.1813	-1.00769	0
LOC4352060	0.02	0	0	0	0.05	0	0	0	0	0.02	0.15	0.05	0.007	0.017	0	0.073	1.04484	0.5885	NA	NA	2.15009	0.04356
LOC107279134	0.87	1.08	0.7	1.71	2.21	1.59	1.81	2.54	1.65	3	2.63	2.03	0.883	1.837	2	2.553	1.0815	0	0.11466	0.6139	0.46267	0.01256
LOC4329567	41.31	41.71	40.53	48.44	58.91	50.73	47.77	46.82	47.81	55.73	56.54	52.93	41.183	52.693	47.467	55.067	0.38556	0	-0.16207	0.00011	0.0505	0.2353
LOC4326362	31.1	29.94	29.07	48.56	47.72	46.01	54.73	51.8	55.71	58.23	56.23	53.57	30.037	47.43	54.08	56.01	0.67688	0	0.1807	0	0.22892	0
LOC9270755	146.07	154.65	152.84	108.46	118.46	141.92	163.29	160.91	159.78	120.24	104.74	109.93	151.187	122.947	161.327	111.637	-0.24303	0	0.36402	0	-0.17282	0
LOC4328301	1.91	1.83	1.82	0.84	1.76	2.26	2.95	1.72	1.64	1.51	1.6	1.5	1.853	1.62	2.103	1.537	-0.1551	0.54636	0.36011	0.1502	-0.10001	0.72592
LOC107276500	0	0	0	0	0	0	0.06	0	0	0	0	0	0	0	0.02	0	NA	NA	NA	NA	NA	NA
LOC4333986	5.32	4.4	4.09	4.45	4.91	5.07	5.49	5.59	4.8	5.97	5.97	5.09	4.603	4.81	5.293	5.677	0.11195	0.40556	0.16012	0.23064	0.23261	0.06223
LOC4338371	17.57	16.95	16.45	18.06	20	18.59	19.96	21.36	21.15	25.6	27.63	24.79	16.99	18.883	20.823	26.007	0.18231	0.00049	0.13133	0.01139	0.45578	0
LOC4347509	36.16	36.82	38.06	35.52	30.31	32.47	28.54	32.48	31.63	28.62	26.96	27.92	37.013	32.767	30.883	27.833	-0.15719	1e-05	-0.09591	0.01304	-0.24726	0
LOC4331823	0	0.06	0	0.06	0	0	0	0	0	0	0	0	0.02	0.02	0	0	0.04484	0.98677	NA	NA	NA	NA
LOC112936073	1.07	0.65	0.88	3.43	2.21	4.84	4.22	5.53	4.12	2.65	3.95	3.34	0.867	3.493	4.623	3.313	2.09408	0	0.2785	0.00462	-0.00379	0.98331
LOC4341932	1.5	1.73	2.19	2.89	0.39	2.26	1.08	0.61	0.23	0	0.05	0.06	1.807	1.847	0.64	0.037	0.07428	0.73497	-1.55155	0	-5.61784	0
LOC4340875	8.27	7.47	7.82	6.52	10.02	8.91	9.22	9.23	9.12	9.28	9.77	9.81	7.853	8.483	9.19	9.62	0.11823	0.0565	0.11474	0.06549	0.17928	0.00227
LOC4333827	113.46	108.39	122.47	89.1	78.39	100.66	59.51	82.29	66.99	69.4	66.51	78.1	114.773	89.383	69.597	71.337	-0.32728	0	-0.37941	0	-0.34585	0
LOC107278325	0	0	0	0	0.07	0	0	0.06	0.03	0.03	0.19	0.13	0	0.023	0.03	0.117	NA	NA	0.56957	0.72673	2.43959	0.01505
LOC4347251	8.49	7.86	8.1	12.04	15.58	13.72	18.03	14.69	14.69	11.05	10.64	8.23	8.15	13.78	15.803	9.973	0.77391	0	0.19113	0.00148	-0.47542	0
LOC4342935	2.31	2.5	2.93	3.34	5.15	3.5	5.35	5.51	4.53	4.85	4.37	4.11	2.58	3.997	5.13	4.443	0.61442	0	0.34182	0.00057	0.16376	0.11965
LOC4325338	0.06	0	0	1.47	3.72	2.42	0	0.24	0.27	7.34	4.32	6.91	0.02	2.537	0.17	6.19	7.02212	0	-3.90521	0	1.28828	0
LOC4343390	0.21	0.1	0.07	0.21	0.47	0.31	0.31	0.42	0.28	0.31	0.84	0.45	0.127	0.33	0.337	0.533	1.39276	0.00623	0.03523	0.95253	0.69637	0.05825
LOC4352773	30.63	36.32	31.97	47.64	47.91	43.22	24.38	33.64	27.71	38.24	37.43	33.58	32.973	46.257	28.577	36.417	0.50695	0	-0.70401	0	-0.35667	0
LOC107276949	0.07	0.05	0.03	0.07	0.06	0.07	0.07	0.04	0.09	0.03	0.04	0.08	0.05	0.067	0.067	0.05	0.39276	0.54569	0.08414	0.90959	-0.36776	0.58735
LOC4342265	4.55	3.41	4.01	3.63	5.22	4.25	4.81	4.96	5.3	3.98	4.3	3.73	3.99	4.367	5.023	4.003	0.14175	0.18857	0.19884	0.05674	-0.13114	0.23843
LOC9268985	0	0	0.04	0.16	0.04	0.59	0.08	0	0	0	0	0.04	0.013	0.263	0.027	0.013	4.36677	1e-05	-3.33733	9e-05	-4.34177	1e-05
LOC4347665	3.94	4.49	4.36	4.86	8.1	7.57	7.08	6.11	6.48	3.18	2.15	2.46	4.263	6.843	6.557	2.597	0.68724	0	-0.06254	0.44834	-1.39835	0
LOC4331757	2.08	1.97	1.4	0.97	1.54	1.1	1.32	1.45	1.42	0.4	0.43	0.44	1.817	1.203	1.397	0.423	-0.59324	7e-05	0.21726	0.21903	-1.50888	0
LOC4334513	0.15	0.41	0.36	0.71	0.75	1.02	0.26	0.21	0.1	1.76	2.66	1.43	0.307	0.827	0.19	1.95	1.45987	0.00018	-2.14093	0	1.21538	0
LOC4326409	9.55	7.77	1.96	69.31	88.61	83.29	16.26	11.48	15.52	264.1	162.58	238.44	6.427	80.403	14.42	221.707	3.70254	0	-2.50235	0	1.43452	0
LOC4343721	18.06	17.74	20.38	14.44	12.49	17.92	18.55	18.69	17.31	13.53	13.49	14.08	18.727	14.95	18.183	13.7	-0.29484	0	0.27434	1e-05	-0.13985	0.03677
LOC4328493	9.22	8.58	8.07	7.04	8.53	8.28	11.37	9.55	10.41	6.98	5.83	4.34	8.623	7.95	10.443	5.717	-0.11163	0.02743	0.39118	0	-0.47969	0
LOC107280800	0	0	0	0	0	0	0	0	0	0	0.15	0	0	0	0	0.05	NA	NA	NA	NA	NA	NA
LOC9269554	3.53	3.19	3.26	5.3	5.47	5.56	5.36	6.32	4.2	6.5	6.74	5.63	3.327	5.443	5.293	6.29	0.73138	0	-0.05208	0.65075	0.19564	0.04299
LOC4333177	2.29	2.38	2.24	2.99	2.65	3.23	2.65	3.43	3.45	2.74	3.71	3.46	2.303	2.957	3.177	3.303	0.37579	0.00148	0.09608	0.44022	0.14964	0.19339
LOC4335944	8.19	5.64	8.71	4.17	1.23	3.5	10.15	7.46	8.37	2.52	1.1	1.08	7.513	2.967	8.66	1.567	-1.30976	0	1.52483	0	-0.94474	0
LOC4330454	19.95	17.74	18.64	27.44	23.29	24.27	18.46	25.43	23.02	52.46	59.95	55.5	18.777	25	22.303	55.97	0.41463	0	-0.16653	0.00013	1.15345	0
LOC4336823	5.3	4.45	5.51	4.38	4.63	4.22	3.31	3.84	3.47	3.25	2.74	2.11	5.087	4.41	3.54	2.7	-0.19059	0.05322	-0.32387	0.00305	-0.71867	0
LOC4345346	0.78	0.44	0.77	3.45	5.96	5.2	1.72	1.63	2.05	9.46	9.1	7.65	0.663	4.87	1.8	8.737	2.90834	0	-1.44891	0	0.82632	0
LOC4349432	9.06	9.77	9.89	16.98	18.19	13.65	12.22	13.07	13.88	21.21	21.31	20.42	9.573	16.273	13.057	20.98	0.77783	0	-0.32264	0	0.36112	0
LOC4351400	10.97	7.57	7.97	11.42	7.74	8.3	8.2	6.61	5.45	7.34	6.81	7.46	8.837	9.153	6.753	7.203	0.12866	0.41581	-0.47319	0.00381	-0.39125	0.01458
LOC4336581	7.38	6.03	7.15	13.89	16.06	14.76	13.14	12.75	12.21	13.53	14.44	13.58	6.853	14.903	12.7	13.85	1.22214	0	-0.22135	0.00032	-0.14745	0.01583
LOC9271637	0.61	0.67	0.8	0.74	0.49	0.66	0.47	0.82	0.74	0.41	0.21	0.2	0.693	0.63	0.677	0.273	-0.102	0.81451	0.08414	0.86656	-1.24223	0.01436
LOC4325575	11.53	10.57	10.52	12.61	11.29	10.71	8.67	9.81	9.44	12.96	13.64	13.78	10.873	11.537	9.307	13.46	0.09722	0.04822	-0.31581	0	0.21499	0
LOC4349599	10.22	9.06	9.81	13.95	15.64	12.3	10.31	13.29	11.86	15.39	15.91	13.5	9.697	13.963	11.82	14.933	0.53322	0	-0.24349	0	0.09279	0.02937
LOC9271906	0.49	0.63	0.37	0.86	1.02	1.1	1.08	0.44	1.04	1.75	1.49	1.21	0.497	0.993	0.853	1.483	1.01682	4e-05	-0.22839	0.3497	0.56512	0.00335
LOC4346359	0.16	0.15	0.06	0.15	0.34	0.27	0.36	0.27	0.12	0.62	0.3	0.38	0.123	0.253	0.25	0.433	1.04794	0.00755	-0.01299	0.9863	0.76398	0.00886
LOC107276913	1.01	0.65	0.65	0.59	0.31	0.76	1.85	3.01	1.73	1.91	2.84	2.67	0.77	0.553	2.197	2.473	-0.43321	0.26184	1.95861	0	2.127	0
LOC9268830	2.31	2.82	2.59	0.86	1.23	1.04	0.53	1.1	1.09	2.05	0.88	1.72	2.573	1.043	0.907	1.55	-1.24693	7e-05	-0.22952	0.6338	0.54845	0.14466
LOC9266311	4.76	4.97	4.89	8.7	13.84	10.89	9.53	8.3	7.92	12.53	12.97	12.3	4.873	11.143	8.583	12.6	1.21131	0	-0.40075	0	0.14271	0.00965
LOC4340400	32.45	27.68	29.21	20.03	26.19	24.07	34.79	26.6	26.18	23.79	21.85	21.05	29.78	23.43	29.19	22.23	-0.31659	0	0.30447	0	-0.09258	0.14637
LOC4332014	77.96	80.67	82.47	55.74	43.86	52.97	58.41	60	62.5	37.19	33.46	35.82	80.367	50.857	60.303	35.49	-0.66644	0	0.23915	0	-0.5121	0
LOC4334358	18.87	21.41	18.37	28.49	38.59	38.93	30.12	28.85	25.57	26.28	25.94	22.22	19.55	35.337	28.18	24.813	0.83035	0	-0.35181	0	-0.53698	0
LOC4346592	0	0	0.1	0	0.14	0.03	0.1	0.14	0	0	0.03	0.13	0.033	0.057	0.08	0.053	0.7818	0.49892	0.47003	0.64724	-0.01984	0.99379
LOC107280495	0.05	0.05	0.05	0.33	0.29	1.31	4.11	4.04	4.47	0.8	1.14	1.08	0.05	0.643	4.207	1.007	3.85528	0	2.69248	0	0.60712	0.04552
LOC4343552	24.61	22.96	28.99	10.24	7.09	7.63	6.02	6.75	5.92	2.81	1.89	3.26	25.52	8.32	6.23	2.653	-1.60184	0	-0.42664	0	-1.65702	0
LOC4345351	0	0.06	0	0	0	0	0	0	0	0.12	0	0.02	0.02	0	0	0.047	NA	NA	NA	NA	NA	NA
LOC4327089	79.03	79.53	83.08	78.48	110.5	94.63	92.12	84.97	77.99	96.72	79.84	79.26	80.547	94.537	85.027	85.273	0.24789	0	-0.15956	0	-0.1576	0
LOC4347803	6.02	5.73	5.53	6.35	8.1	7.73	7.91	7.5	5.81	7.62	7.56	7.16	5.76	7.393	7.073	7.447	0.38038	6e-05	-0.07332	0.4805	-0.00188	0.99384
LOC4334018	8.68	8.06	7.87	7.96	9.63	7.95	9.86	8.14	7.51	8.5	8.49	9.34	8.203	8.513	8.503	8.777	0.07294	0.42239	-0.02938	0.77702	0.02357	0.81057
LOC9271765	4.49	3.96	4.67	7.31	6.52	6	5.35	6.44	5.76	9.56	12.17	10.12	4.373	6.61	5.85	10.617	0.59044	0	-0.19611	0.001	0.66398	0
LOC4342809	1.02	1.01	0.98	0.95	1.13	1.23	0.87	0.67	0.63	0.03	0.13	0.13	1.003	1.103	0.723	0.097	0.15063	0.51884	-0.62239	0.01141	-3.47927	0
LOC4333394	9.23	10.33	9.65	5.6	7.63	7.04	9.35	6.03	8.01	4.81	5.24	4.53	9.737	6.757	7.797	4.86	-0.49546	0	0.1931	0.1118	-0.49475	0.0001
LOC9270221	0	0.03	0.03	0	0.13	0	0	0.03	0	0.03	0	0	0.02	0.043	0.01	0.01	1.04484	0.43678	-2.0154	0.22072	-2.01984	0.20524
LOC4324562	103.46	106.89	108.64	126.76	115.57	105.35	135.98	106.63	108.53	81.83	69.91	71.47	106.33	115.893	117.047	74.403	0.16142	0	-0.00298	0.94372	-0.66134	0
LOC4334107	37.42	35.75	34.74	34.72	39.53	35.51	38.66	35.92	38.12	37.6	34.56	32.68	35.97	36.587	37.567	34.947	0.03892	0.2737	0.03202	0.40015	-0.07463	0.03518
LOC4336684	4.23	3.5	3.4	5.34	8.47	7.78	4.54	5.15	4.23	7.76	7.46	8.91	3.71	7.197	4.64	8.043	0.96642	0	-0.63589	0	0.15614	0.08673
LOC4325228	0	0.11	0	0	0	0	0.11	0.28	0.11	0	0.11	0	0.037	0	0.167	0.037	NA	NA	4.15453	0.00575	NA	NA
LOC4342706	20.49	18.15	20.77	19.32	23.32	18.97	22.29	18.3	20.95	18.68	17.77	18.75	19.803	20.537	20.513	18.4	0.06821	0.21551	-0.00297	0.97505	-0.17105	0.0018
LOC4348374	0	0	0	0	0	0	0.29	0.24	0.26	0.03	0.42	0.13	0	0	0.263	0.193	NA	NA	5.89149	0	5.43959	0
LOC4351127	0.33	0.4	0.49	0.42	0.48	0.51	0.41	0.49	0.52	0.72	0.76	0.51	0.407	0.47	0.473	0.663	0.27309	0.29596	0.05132	0.86421	0.66117	0.00215
LOC4325155	39.39	38.72	36.31	64.03	71.58	68.25	59.81	61.24	57.6	63.06	64.35	63.72	38.14	67.953	59.55	63.71	0.84828	0	-0.19748	0	-0.1018	9e-05
LOC4330306	0	0	0	0.15	0.05	0	0	0.05	0	0.05	0.41	0	0	0.067	0.017	0.153	NA	NA	-2.0154	0.22072	1.15009	0.21171
LOC107276933	4.99	5.31	3.79	8.59	8	6.05	9	5.6	6.44	2.83	3.01	2.96	4.697	7.547	7.013	2.933	0.71151	0	-0.11743	0.29712	-1.37878	0
LOC4351433	12.43	11.42	11.2	9.36	9.74	7.84	13.8	10.08	12.42	10.73	9.63	7.92	11.683	8.98	12.1	9.427	-0.36793	0	0.42565	0	0.06151	0.38996
LOC4326463	3.2	1.62	1.62	4.06	6.51	5.78	5.12	4.15	3.83	8.96	8.21	9.34	2.147	5.45	4.367	8.837	1.37427	0	-0.33234	0.01551	0.68175	0
LOC4344920	32.53	38.93	37.43	43.14	38.02	40.6	39.24	39.27	42.21	35.54	34.74	35.12	36.297	40.587	40.24	35.133	0.19141	2e-05	-0.02674	0.60867	-0.23181	0
LOC4325131	9.88	8.69	9.72	10.99	10.18	8.37	9.64	10.33	11.06	9.76	10.28	10.12	9.43	9.847	10.343	10.053	0.0689	0.07933	0.06823	0.08988	0.02485	0.55739
LOC107276810	24.88	27.42	26.59	12.43	7.29	12.65	30.89	35.15	34.68	2.71	2.93	2.04	26.297	10.79	33.573	2.56	-1.26283	0	1.62372	0	-2.09259	0
LOC4331247	9.52	9.59	9.47	13.25	10.46	9.11	7.86	9.37	9.56	10.12	11.33	11.5	9.527	10.94	8.93	10.983	0.20712	0	-0.29768	0	0.00046	0.99662
LOC9266177	6.21	6.86	3.84	24.99	32.33	29.73	13.77	17.46	14.36	31	26.12	27.95	5.637	29.017	15.197	28.357	2.39533	0	-0.94775	0	-0.0504	0.40477
LOC4326436	16.11	14.51	15.87	18.62	15.98	15.05	10.52	16.66	16.01	17.99	23.31	19.46	15.497	16.55	14.397	20.253	0.0837	0.01933	-0.20508	0	0.28839	0
LOC112936053	0	0	0.19	0.06	0.13	0	0.69	0.06	0	0	0.06	0.06	0.063	0.063	0.25	0.04	0.04484	0.97985	1.9846	0.0289	-0.6048	0.69423
LOC4336343	0.83	0.33	0.99	11.26	11.34	8.4	0.67	0.96	0.46	0.87	0.71	0.37	0.717	10.333	0.697	0.65	3.87773	0	-3.90487	0	-3.99858	0
LOC4342129	670.08	702.07	664.66	651.22	716.63	685.73	449.4	472.33	431.74	597.59	621.06	580.08	678.937	684.527	451.157	599.577	0.05174	3e-05	-0.62048	0	-0.21465	0
LOC4343381	3.26	4.92	5.3	5.2	5.5	4.83	5.3	4.22	4.8	5.87	5.1	6.68	4.493	5.177	4.773	5.883	0.24468	0.12491	-0.13507	0.43625	0.162	0.29942
LOC4339626	9.76	10.89	8.56	9.54	12.13	8.94	7.05	6.19	8.03	6.32	6.29	7.27	9.737	10.203	7.09	6.627	0.08512	0.28235	-0.53074	0	-0.63122	0
LOC4327598	1.67	1.96	1.73	1.65	3.25	1.81	1.6	1.63	1.63	2.03	2.19	2.17	1.787	2.237	1.62	2.13	0.37796	0.00091	-0.48088	5e-05	-0.108	0.3623
LOC4351985	0	0	0	2.93	4.15	1.75	0.6	0.55	0.49	2.01	0.93	0.48	0	2.943	0.547	1.14	8.35772	0	-2.42139	0	-1.37853	0
LOC4334887	1.08	1.68	1.45	1.1	0.41	1.33	0.6	0.45	0.34	0.64	0.95	0.96	1.403	0.947	0.463	0.85	-0.62501	0.00756	-1.1529	0.00037	-0.28287	0.33956
LOC112937877	0.7	0.74	0.7	0.54	0.63	0.63	0.37	0.62	0.31	0.4	0.71	0.62	0.713	0.6	0.433	0.577	-0.23075	0.30165	-0.47818	0.06235	-0.06391	0.80705
LOC4336220	18.76	19.18	18.36	17	20.23	16.45	19.13	19.31	19.06	22.58	21.31	20.11	18.767	17.893	19.167	21.333	0.05588	0.32156	0.06829	0.23872	0.23799	0
LOC9268989	7.81	7.53	7.95	12.9	18.95	12.69	12.23	12.47	12.74	12.69	14.62	11.4	7.763	14.847	12.48	12.903	0.94828	0	-0.25399	3e-05	-0.20915	0.00048
LOC4329197	16.41	14.25	13.47	13.4	16.09	15.69	20.55	18.61	18.87	16.45	19.55	16.94	14.71	15.06	19.343	17.647	0.0608	0.41752	0.34876	0	0.21272	0.00188
LOC9267323	132.28	128.81	129.25	103.22	107.09	109.93	104.56	126.25	117.4	110.25	111.45	107.63	130.113	106.747	116.07	109.777	-0.26884	0	0.11276	0	0.03011	0.16707
LOC107278716	0	0	0	0	0	0	0.03	0.07	0	0	0	0	0	0	0.033	0	NA	NA	NA	NA	NA	NA
LOC4328121	835.99	847.42	842.76	1785.46	1509.47	1513.92	1849.3	1486.78	1673.41	830.97	773.3	731.88	842.057	1602.95	1669.83	778.717	0.9713	0	0.03871	0	-1.06764	0
LOC4325769	1.85	1.47	1.53	1.76	1.15	1.59	2.14	1.75	1.26	0.29	0.45	0.35	1.617	1.5	1.717	0.363	-0.09174	0.62663	0.1849	0.338	-2.07193	0
LOC4346801	5.85	5.42	5.07	6.95	7.32	8.61	7.49	7.55	7.47	8.25	10.36	10.17	5.447	7.627	7.503	9.593	0.51383	0	-0.03781	0.75472	0.31348	0.00095
LOC4333786	0.55	0.29	0.37	0.42	0.47	0.35	0.38	0.38	0.27	0.53	0.35	0.4	0.403	0.413	0.343	0.427	0.04484	0.90269	-0.29103	0.4348	0.04156	0.91414
LOC9266682	0	0	0	0.27	0.56	0.48	0.07	0.21	0	16.83	12.23	24.8	0	0.437	0.093	17.953	6.29276	0	-2.26332	1e-05	5.36068	0
LOC4350530	0.3	0.45	0.35	1.43	1.34	1.16	1.66	1.24	1.14	2.68	3.81	2.98	0.367	1.31	1.347	3.157	1.84892	0	0.03613	0.83836	1.2622	0
LOC4334100	0.69	0.81	1	2.28	2.72	1.96	1.35	1.09	0.77	9.42	8.31	7.87	0.833	2.32	1.07	8.533	1.48372	0	-1.16478	0	1.72185	0
LOC4338392	12.31	12.45	14.08	13.64	9.9	12.73	10.15	14.15	12.05	14.79	15.62	15.37	12.947	12.09	12.117	15.26	-0.07224	0.26817	-0.01022	0.90256	0.32168	0
LOC4329555	0.42	0.62	1.05	1.52	1.54	1.49	1.52	1	0.95	3.39	3.65	3.25	0.697	1.517	1.157	3.43	0.93044	0.00127	-0.21449	0.46387	1.34341	0
BGIG39947_31878	0.1	0.16	0.19	0.16	0.23	0.17	0.22	0.2	0.18	0.25	0.48	0.27	0.15	0.187	0.2	0.333	0.31162	0.23788	0.11013	0.69632	0.84266	5e-05
LOC107280389	0	0	0	0.02	0	0	0	0	0	0	0.02	0.04	0	0.007	0	0.02	NA	NA	NA	NA	1.56512	0.37083
LOC4331720	0	0.08	0	0.04	0.04	0.04	0.04	0	0.08	0.04	0	0	0.027	0.04	0.04	0.013	0.6298	0.66933	-0.0154	0.99947	-1.6048	0.35916
LOC4342936	0	0.02	0.02	0.02	0.02	0.06	0.05	0	0.02	0	0.05	0	0.013	0.033	0.023	0.017	1.6298	0.16728	-0.60036	0.59307	-1.01984	0.36115
LOC4325063	6.68	6.65	7.57	11.71	13.81	12.68	16.42	19.44	16.5	7.01	5.57	6.9	6.967	12.733	17.453	6.493	0.85492	0	0.44376	0	-0.97212	0
LOC4345657	109.25	105.12	109.28	81.71	66.82	69.52	88.84	90.34	91.61	71.4	83.13	76.95	107.883	72.683	90.263	77.16	-0.54654	0	0.30005	0	0.07083	0.01022
LOC112937316	2.7	3.32	3	2.57	0.5	1.66	2.81	5.02	3.89	0.22	0.05	0.11	3.007	1.577	3.907	0.127	-0.88805	0	1.28006	0	-3.67192	0
LOC4341853	14.94	15.66	15.96	15.29	15.6	13.08	13.48	15.49	15.31	18.48	19.51	19.13	15.52	14.657	14.76	19.04	-0.07483	0.11635	0.00737	0.9056	0.37043	0
LOC4343454	3.82	3.41	1.8	4.29	5.75	6.81	3.68	2.42	2.98	5.76	4.13	2.89	3.01	5.617	3.027	4.26	0.93792	0	-0.90848	0	-0.42015	0.00333
LOC4340058	17.44	16.77	15.78	14.71	24.61	21.74	24.26	19.95	19.08	19.75	16.16	13	16.663	20.353	21.097	16.303	0.30999	0	0.04569	0.48313	-0.33149	0
LOC4347241	1.66	1.49	1.6	2.44	3.02	2.2	2.4	2.32	2.69	2.71	3.67	2.83	1.583	2.553	2.47	3.07	0.69429	0	-0.05266	0.62517	0.25671	0.00338
LOC4344190	2.9	3.52	2.35	2.92	2.46	2.12	2.97	3.17	2.85	1.87	2.04	1.53	2.923	2.5	2.997	1.813	-0.20571	0.13454	0.25074	0.07662	-0.47694	0.00178
LOC9267172	20.7	20.6	21.66	25.79	26.83	23.17	18.89	27.96	23.68	19.35	21.67	21.43	20.987	25.263	23.51	20.817	0.27654	0	-0.10724	0.00091	-0.28406	0
LOC9271458	2.18	1.84	2.69	5.08	3.5	6.16	2.99	2.7	2.56	2.57	2.63	2.62	2.237	4.913	2.75	2.607	1.16275	0	-0.8532	0	-0.9313	0
LOC4330549	10.83	10.18	10.55	13.77	19.99	18.87	20.43	18.49	17.89	19.65	19.15	18.9	10.52	17.543	18.937	19.233	0.7656	0	0.09848	0.17463	0.11713	0.09119
LOC4341357	4.36	3.59	3.36	4.71	10.61	6.92	7.55	5.65	6.3	8.4	7	8.51	3.77	7.413	6.5	7.97	0.99325	0	-0.19268	0.0737	0.09872	0.3438
LOC107277265	0	0	0	0	0	1.19	0	0	1.12	0.59	0.59	0	0	0.397	0.373	0.393	6.26246	0	-0.09879	0.82094	-0.05834	0.891
LOC107276380	3.69	4.69	5.59	4.52	2.33	5.13	5.69	5.35	4.97	2.08	3.09	3.68	4.657	3.993	5.337	2.95	-0.20882	0.02483	0.40406	1e-05	-0.45368	1e-05
LOC4327989	44.27	45.76	44.1	38.86	42.49	39.12	47.38	45.61	53.86	37.9	38.29	33.95	44.71	40.157	48.95	36.713	-0.12949	3e-05	0.27265	0	-0.13763	3e-05
LOC4347397	3.16	3.59	3.06	1.62	2.24	2	3.87	3.45	4.14	4.54	4.86	4.24	3.27	1.953	3.82	4.547	-0.70825	0.00031	0.95181	0	1.19792	0
LOC4325010	5.46	5.42	5.55	9.1	11.18	9.09	7.41	8.77	7.63	15.4	22.04	14.51	5.477	9.79	7.937	17.317	0.84969	0	-0.30699	0	0.81531	0
LOC9267457	4.75	4.7	4.3	3.93	3.24	4.41	4.85	4.34	4.41	3.25	3.31	3.44	4.583	3.86	4.533	3.333	-0.22356	0.05546	0.21815	0.0751	-0.22771	0.07883
LOC4348995	4.79	4.46	4.93	8.43	9.45	7.06	5.07	6.01	5.7	11.08	12.31	11.63	4.727	8.313	5.593	11.673	0.83008	0	-0.56644	0	0.4581	0
LOC9270842	0	0	0	0	0	0	0	0	0	0	0.03	0.03	0	0	0	0.02	NA	NA	NA	NA	NA	NA
LOC4332532	307.95	335.88	313.42	297.52	278.13	303.09	401.83	336.51	351.57	261.14	240.09	240.4	319.083	292.913	363.303	247.21	-0.06968	0.00112	0.28492	0	-0.27744	0
LOC4352641	40.02	34.76	36.51	35.11	39.57	35.57	31.02	34.85	33.31	54.78	56.94	52.61	37.097	36.75	33.06	54.777	0.00455	0.91946	-0.16063	4e-05	0.56528	0
LOC4332926	0.37	1.16	0.93	9.94	20.58	13.94	2.92	8.47	5.34	33.92	32.66	25.41	0.82	14.82	5.577	30.663	4.18913	0	-1.41594	0	1.04016	0
LOC107279063	0.16	0	0	0	0.16	0	0	0	0	0	0.16	0.15	0.053	0.053	0	0.103	0.04484	0.98677	NA	NA	0.98016	0.6253
LOC4340165	3	4.39	4.24	4.08	4.52	4.71	3.65	3.89	3.49	6.48	5.69	5.13	3.877	4.437	3.677	5.767	0.39401	1e-05	-0.25203	0.00566	0.32579	4e-05
LOC4349693	19	17.51	18.63	18.1	30.13	24.25	29.12	24.44	24.14	20.47	20.4	20.43	18.38	24.16	25.9	20.433	0.39903	0	0.09683	0.06643	-0.24468	0
LOC4328296	0.77	1.01	1.11	1.22	2.24	1.52	0.23	0.29	0.26	7.63	9.3	6.97	0.963	1.66	0.26	7.967	0.80209	0	-2.68594	0	2.26071	0
LOC4347728	31.25	31.86	32.08	30.32	37.91	37.55	40.21	35.98	36.41	36.8	34.17	33.89	31.73	35.26	37.533	34.953	0.16453	0	0.08494	0.01227	-0.01949	0.60335
LOC4332004	0.9	1.22	0.41	3.81	2.26	2.52	0.64	1.27	1.21	4.4	3.92	3.31	0.843	2.863	1.04	3.877	1.77475	0	-1.34797	0	0.39254	0.00118
LOC4331543	1.06	2.19	1.35	3.81	5.26	4.32	5.56	4.76	3.66	5.52	7.33	7.25	1.533	4.463	4.66	6.7	1.59663	0	0.03946	0.86665	0.5539	0.00119
LOC4335013	9.77	9.06	12.88	17.36	17.77	16.13	12.82	13.1	12.8	16.64	17.69	12.74	10.57	17.087	12.907	15.69	0.71534	0	-0.42097	0	-0.13505	0.00903
LOC4336482	11.26	11.3	11.32	16.13	19.24	16.07	16.16	17.11	14.9	16.19	14.69	14.49	11.293	17.147	16.057	15.123	0.6835	0	-0.11856	0.07661	-0.19712	0.00226
LOC4350841	0	0.11	0.34	0.11	0	0.11	0.67	0.69	0.34	0.68	0.46	1.58	0.15	0.073	0.567	0.907	-0.95516	0.47938	2.89149	0.00187	3.56512	1e-05
LOC107276373	6.4	6.03	7.91	6.36	4.82	6.58	24.17	28.02	20.07	11.08	9.02	10.74	6.78	5.92	24.087	10.28	-0.15737	0.11217	2.00658	0	0.77741	0
LOC4329525	0.9	0.64	0.89	6.01	6.87	5.41	2.62	2.13	1.15	5.7	6.09	6.23	0.81	6.097	1.967	6.007	2.95173	0	-1.64665	0	-0.04023	0.78271
LOC4336042	9.07	8.31	8.1	11.76	13.87	11.92	12.65	11.47	12.88	11.04	10.57	9.3	8.493	12.517	12.333	10.303	0.56511	0	-0.02308	0.62552	-0.2843	0
LOC4327720	76.79	68.24	70.37	64.19	67.21	71.06	89.08	73.64	78.13	54.42	57.06	49.94	71.8	67.487	80.283	53.807	-0.03496	0.47299	0.22698	0	-0.35983	0
LOC107275744	1.17	0.79	1.35	1.39	1.36	1.4	1.36	2.03	1.08	1.93	1.38	2	1.103	1.383	1.49	1.77	0.35452	0.15041	0.09503	0.72139	0.34091	0.12656
LOC9267714	168.65	158.08	160.06	117.46	117.81	125.32	152.01	135.43	148.06	90.22	95.4	90.56	162.263	120.197	145.167	92.06	-0.39431	0	0.25262	0	-0.40833	0
LOC4336284	254.8	246.24	271.17	150.47	146.2	175.72	252.52	288.93	244.63	181.25	163.74	175.01	257.403	157.463	262.027	173.333	-0.69426	0	0.72693	0	0.12957	0
LOC4351491	21.23	22.46	22.55	22.58	24.26	20.38	21.16	18.82	21.14	24.04	24.63	23.22	22.08	22.407	20.373	23.963	0.0439	0.4452	-0.14731	0.01012	0.08374	0.13297
LOC107281536	1.22	0.93	1.13	1.51	3.02	1.94	1.89	2.08	1.91	4.07	5.85	4.46	1.093	2.157	1.96	4.793	0.98254	0	-0.13691	0.19095	1.15401	0
LOC4334823	247.06	259.51	264.32	163.33	137.41	156.77	178.94	217.75	215.27	140.86	135.04	144.87	256.963	152.503	203.987	140.257	-0.73091	0	0.40867	0	-0.13258	0
LOC4347180	118.84	113.79	111.53	112.25	178.79	127.93	128.01	146.3	121.94	280.94	284.4	272.57	114.72	139.657	132.083	279.303	0.30402	0	-0.08702	7e-05	0.99065	0
LOC4325966	122.42	126.08	125.78	99.44	72.53	77.63	96.96	98.03	111.48	61.7	67.41	60.79	124.76	83.2	102.157	63.3	-0.56762	0	0.28668	0	-0.40627	0
LOC4348644	0.03	0	0.03	0.08	0.12	0.17	0.06	0.08	0.14	0.2	0.2	0.06	0.02	0.123	0.093	0.153	2.74528	0.00358	-0.39391	0.5929	0.27972	0.65756
LOC4351390	1.86	1.19	1.33	2.08	2.94	2.13	2.54	2.36	2.33	1.85	2.85	2.09	1.46	2.383	2.41	2.263	0.72602	7e-05	0.00816	0.97927	-0.08386	0.65252
LOC107281444	0.94	0.91	0.96	1.39	1.15	0.71	1.55	0.96	1.27	2.3	2.19	1.8	0.937	1.083	1.26	2.097	0.21887	0.37425	0.1976	0.42429	0.95536	0
LOC4352520	0.88	1.62	0.39	1.69	0	1.38	0.82	0.26	0.69	0.43	2.91	0.03	0.963	1.023	0.59	1.123	0.12369	0.60624	-0.8151	0.00155	0.098	0.68752
LOC4336552	1.32	1.39	1.52	2.44	2.16	2.76	3.38	2.42	2.98	0.36	0.41	0.34	1.41	2.453	2.927	0.37	0.81351	0	0.24614	0.0386	-2.73605	0
LOC4329441	9.41	9.64	9.25	18.91	25.35	21.86	14.97	17.2	15.21	29.24	31.42	27.82	9.433	22.04	15.793	29.493	1.22256	0	-0.49268	0	0.40199	0
LOC4328823	113.84	116.48	117.47	107.02	155.83	134.78	132.96	123.54	127.77	145.4	131.57	127.66	115.93	132.543	128.09	134.877	0.21379	0	-0.05732	0.01384	0.01412	0.56873
LOC4326672	0	0	0	0	0	0	0	0	0	0	0	0.03	0	0	0	0.01	NA	NA	NA	NA	NA	NA
LOC4331361	305.18	338.41	354.37	134.95	92.5	98.1	132.68	135.13	130.31	70.67	44.69	61.91	332.653	108.517	132.707	59.09	-1.57846	0	0.2704	0	-0.89931	0
LOC4335872	18.54	19.06	18.91	21.87	28.46	24.84	18.26	18.19	18.28	29.86	28.84	30.67	18.837	25.057	18.243	29.79	0.43167	0	-0.46621	0	0.23903	0
LOC4344848	0	0	0	0.03	0	0	0.02	0	0	0.02	0.03	0.09	0	0.01	0.007	0.047	NA	NA	-1.0154	0.62983	2.15009	0.04356
LOC4328988	32.29	34.78	33.64	26.1	31.42	33.23	31.09	28.47	30.01	29.55	24.71	26.21	33.57	30.25	29.857	26.823	-0.11924	0.02261	-0.03361	0.59062	-0.19169	0.00051
LOC4335580	0.05	0.05	0.09	0.48	0.4	0.25	0.25	0.21	0.24	0.15	0.09	0.05	0.063	0.377	0.233	0.097	2.40741	0	-0.27843	0.51353	-2.01984	5e-05
LOC4326353	2.31	2.59	2.4	3.94	3.68	2.99	3.03	3.42	2.89	3.95	4.69	2.93	2.433	3.537	3.113	3.857	0.54866	0	-0.18607	0.02868	0.12019	0.13719
LOC4333457	2.05	2.94	2.69	2.01	0.76	1.49	5.07	7.83	7.83	1.85	2.7	2.64	2.56	1.42	6.91	2.397	-0.83617	0	2.27165	0	0.74097	0
LOC107280693	0.13	0.2	0.07	0.6	0.69	0.73	0.35	0.41	0.67	0.2	0.75	0.33	0.133	0.673	0.477	0.427	2.36677	4e-05	-0.51154	0.27341	-0.6788	0.13735
LOC4325780	2.59	2.4	2.38	3.75	4.77	4.07	4.01	3.8	3.98	2.48	2.24	1.97	2.457	4.197	3.93	2.23	0.78099	0	-0.09613	0.33232	-0.91573	0
LOC4325004	84.25	75.14	79.27	67.5	58.67	54.17	65.17	65.81	72.34	48.84	44.49	43.27	79.553	60.113	67.773	45.533	-0.39221	0	0.1669	0	-0.40878	0
LOC4340670	0.59	1.24	0.95	5.67	4.02	5.46	4.9	5.5	3.46	7.35	7.45	10.8	0.927	5.05	4.62	8.533	2.4904	0	-0.1543	0.36337	0.72962	0
LOC9269252	10.35	10.77	8.43	20.79	34.83	27.35	19.56	16.09	17.36	26.38	22.18	22.36	9.85	27.657	17.67	23.64	1.51925	0	-0.65729	0	-0.24205	6e-05
LOC4340305	6.37	6.42	6.63	7.17	5.8	6.66	9.21	10.01	7.91	4.73	4.14	5.46	6.473	6.543	9.043	4.777	0.03728	0.70034	0.45479	0	-0.46638	0
LOC4344144	81.44	81.06	81.44	62.27	68.72	61.95	84.7	69.67	71.16	57.95	39.8	50.63	81.313	64.313	75.177	49.46	-0.30902	0	0.23279	0	-0.39764	0
LOC4339612	10.98	10.45	9.26	9.75	14.09	14.43	8.23	8.52	7.91	14.35	13.07	19.16	10.23	12.757	8.22	15.527	0.33658	0	-0.64186	0	0.27514	1e-05
LOC4327875	0	0	0	0.18	0.48	0.18	0.05	0	0	0.19	0.14	0.28	0	0.28	0.017	0.203	5.21476	2e-05	-4.18532	6e-05	-0.48932	0.40842
LOC4349816	41.17	43.41	42.62	38.49	54.08	54.64	58	49.43	52.09	55.73	51.12	53.74	42.4	49.07	53.173	53.53	0.23117	0	0.10731	0.00261	0.11429	0.00109
LOC4340770	21.67	24.11	22.85	26.22	21.64	23.35	23.04	21.48	25.92	17.23	15.86	17.68	22.877	23.737	23.48	16.923	0.08337	0.15725	-0.03089	0.64366	-0.5065	0
LOC4325481	0.48	0.68	0.41	1.02	1.46	0.76	0.96	0.73	0.75	2.16	2.14	1.5	0.523	1.08	0.813	1.933	1.06043	5e-05	-0.40481	0.1093	0.84188	1e-05
LOC4344160	0.56	0.3	0.41	0.46	0.58	0.61	0.31	0.78	0.51	0.36	0.41	0.51	0.423	0.55	0.533	0.427	0.40098	0.33978	-0.0612	0.90188	-0.37598	0.38601
LOC4324589	5.09	4.96	5.08	5.02	6.46	5.15	4.54	4.57	4.38	5.39	6.14	5.84	5.043	5.543	4.497	5.79	0.15075	0.11114	-0.30752	0.00159	0.05665	0.57141
LOC9269689	2.34	2.63	2.04	2.23	2.74	1.87	1.8	1.66	1.94	7.29	8.79	7.81	2.337	2.28	1.8	7.963	-0.02768	0.84038	-0.34229	0.01235	1.80091	0
LOC4328448	13.53	14.6	12.63	21.24	27.25	23.14	19.37	20.4	19.35	22.46	23.3	21.96	13.587	23.877	19.707	22.573	0.82099	0	-0.2796	0	-0.08511	0.01486
LOC4329685	0	0	0	0	0	0	0	0	0	0	0	0	0	0	0	0	NA	NA	3.89149	0.76621	2.98016	0.84187
LOC4333784	28.1	25.34	27.12	11.26	13.24	15.39	24.4	27.31	24.26	13.48	10.45	13.63	26.853	13.297	25.323	12.52	-0.99792	0	0.92172	0	-0.0954	0.12568
LOC107275335	60.77	56.93	59.05	14.48	7.15	22.41	41.36	38.45	42.06	2.11	1.55	1.4	58.917	14.68	40.623	1.687	-1.89366	0	1.40369	0	-3.19569	0
LOC4340517	13.86	14.23	17.45	6.61	5.98	6.64	8.75	7.09	7.7	5.97	5.85	5.74	15.18	6.41	7.847	5.853	-1.20917	0	0.27271	0.0018	-0.12933	0.18125
LOC4346082	75.75	72.03	79.07	105.03	92.44	90.38	107.39	95.01	92.71	73.87	65.35	71.08	75.617	95.95	98.37	70.1	0.37222	0	0.02105	0.5241	-0.471	0
LOC4347151	10.9	10.37	9.37	14.67	11.87	10.51	9.25	12.45	10.47	18	19.99	17.56	10.213	12.35	10.723	18.517	0.29323	1e-05	-0.21429	0.00117	0.57135	0
LOC4337622	113.13	111.4	114.37	264.07	140.3	183.4	138.84	251.06	223.1	222.93	230.55	266.75	112.967	195.923	204.333	240.077	0.82946	0	0.03979	0.05717	0.27041	0
LOC4327928	12.85	15.61	13.15	5.91	2.68	4.09	13.77	13.47	15.14	0.72	0.58	0.57	13.87	4.227	14.127	0.623	-1.66747	0	1.71421	0	-2.787	0
LOC4324885	0.02	0.06	0.06	0.04	0.04	0.04	0.12	0.34	0.27	0.02	0.08	0.09	0.047	0.04	0.243	0.063	-0.17756	0.84968	2.64757	0	0.71713	0.38693
LOC4348848	0.17	0.06	0.11	0.85	1.3	1.02	2.35	2.14	1.78	3.79	4.01	3.64	0.113	1.057	2.09	3.813	3.24123	0	0.97143	7e-05	1.83543	0
LOC4342925	5.39	5.95	4.77	3.18	4.38	3.96	3.33	4.26	4.87	5.98	4.61	7.73	5.37	3.84	4.153	6.107	-0.46934	0	0.10818	0.37426	0.66457	0
LOC4326898	0.37	0.37	0.23	0.57	0.45	1.18	0.34	0.64	0.64	0.71	0.88	0.87	0.323	0.733	0.54	0.82	1.20922	0.00016	-0.4528	0.13988	0.14762	0.60945
LOC4331759	96.13	93.02	88.71	99.92	124.47	127.08	203.38	135.77	131.08	118.18	106.84	106.62	92.62	117.157	156.743	110.547	0.39742	0	0.39498	0	-0.11823	0.00155
LOC4340113	28.97	28.45	29.99	35.54	36.4	32.67	34.48	41.09	39.79	35.52	35.95	39.29	29.137	34.87	38.453	36.92	0.3008	0	0.12298	0.03863	0.05983	0.33248
LOC4330527	4.94	4.76	5.12	4.22	3.4	3.75	4.17	3.84	5.04	3.76	2.97	3.66	4.94	3.79	4.35	3.463	-0.34491	0.01871	0.1859	0.26122	-0.14888	0.38813
LOC9269152	11.8	9.98	10.95	7.96	6.11	7.15	8.5	8.38	8.23	4.94	5.13	5.05	10.91	7.073	8.37	5.04	-0.61205	0	0.23374	6e-05	-0.49768	0
LOC4334682	18.38	18.58	17.32	25.84	24.71	20.02	15.11	19.65	18.15	24.6	26.88	26.47	18.093	23.523	17.637	25.983	0.3902	0	-0.42108	0	0.13647	0.00013
LOC4349739	6.72	6.19	7.45	8.76	16.04	13.07	13.35	12.27	9.67	13.69	12.37	11.1	6.787	12.623	11.763	12.387	0.91118	0	-0.10261	0.17631	-0.03191	0.68263
LOC4352498	0.58	0.55	0.38	0.73	0.58	0.81	0.84	0.82	0.86	0.23	0.36	0.63	0.503	0.707	0.84	0.407	0.51299	0.04605	0.23892	0.33773	-0.80992	0.00278
LOC4344085	28.73	28.93	25.52	27.49	28.37	24.24	28.72	26.95	27.29	37.42	41.67	36.83	27.727	26.7	27.653	38.64	-0.02537	0.66878	0.0371	0.55838	0.51568	0
LOC4328830	162.2	166.99	171.58	166.15	134.69	137.68	112.52	135.35	130.85	116.81	119.97	115.21	166.923	146.173	126.24	117.33	-0.16687	0	-0.22367	0	-0.33176	0
LOC9272432	0	0	0	0	0	0	0.05	0.1	0	0	0	0	0	0	0.05	0	NA	NA	NA	NA	NA	NA
LOC4331443	16.5	16.7	14.52	13.68	8.84	32.26	109.24	122.6	122.53	7.08	5.92	7.05	15.907	18.26	118.123	6.683	0.23863	0.0001	2.67965	0	-1.47326	0
LOC9267130	0.78	1.32	1.22	0.89	1.27	1.41	1.26	1.57	1.41	1.63	1.79	1.7	1.107	1.19	1.413	1.707	0.1148	0.51802	0.24906	0.13915	0.51592	0.00058
LOC4338647	57.62	59.23	58.5	47.14	38.43	48.44	47.16	53.54	51.62	41.51	49.42	50.41	58.45	44.67	50.773	47.113	-0.34334	0	0.161	0.00106	0.04867	0.35984
LOC4343477	13.48	12.46	13.54	11.67	9.16	9.69	13.07	19.64	18.2	17.1	20.77	17.98	13.16	10.173	16.97	18.617	-0.34663	0	0.73651	0	0.85488	0
LOC4329361	611.29	597.89	596.05	531.55	570.59	557.86	919.89	689.23	728.56	517.02	410.4	410.83	601.743	553.333	779.227	446.083	-0.07325	0	0.47256	0	-0.33877	0
LOC112935996	5.37	5.69	5.14	8.76	11.6	11.82	4.8	6.61	4.78	8.14	9.13	7.77	5.4	10.727	5.397	8.347	1.00405	0	-0.99741	0	-0.37082	0
BGIG39947_32158	0	0.37	0.37	1.15	4.62	3.13	1.22	0.15	0.94	9.28	7.76	7.74	0.247	2.967	0.77	8.26	3.62879	0	-1.95762	0	1.44673	0
LOC4325822	4.28	4.36	3.23	6.65	6.75	5.51	4.07	6.48	5.67	3.59	4.27	4.32	3.957	6.303	5.407	4.06	0.68839	0	-0.22904	0.01409	-0.64483	0
LOC9270017	9.65	8.91	9.26	12.96	14.71	11.67	9.56	11.02	9.45	13.87	15.28	13.9	9.273	13.113	10.01	14.35	0.48887	0	-0.37951	0	0.13485	0.00152
LOC9266671	0.27	0.13	0.47	0.27	0.33	0.13	0.18	0.24	0.04	0.83	0.64	0.27	0.29	0.243	0.153	0.58	-0.23443	0.66846	-0.68282	0.29918	1.22452	0.00458
LOC9271153	14.48	14.77	13.28	25.1	35.95	29.32	23.16	21.57	20.97	31.35	30.66	28.48	14.177	30.123	21.9	30.163	1.20944	0	-0.56458	0	0.0434	0.21511
LOC4345885	1.84	2.77	0.76	4.55	4.56	6.05	3.61	7.04	6.07	4.25	4.74	4.7	1.79	5.053	5.573	4.563	1.52596	0	0.12797	0.30967	-0.16468	0.19151
LOC4352151	0.05	0	0.15	0.05	0.25	0.1	0	0.05	0	0.29	0.35	0.29	0.067	0.133	0.017	0.31	1.04484	0.26269	-3.0154	0.02221	1.22809	0.04978
LOC4343927	7.56	6.79	7.12	6.77	5.94	4.95	5.94	6.66	7.01	9.01	11.51	9.25	7.157	5.887	6.537	9.923	-0.3009	0	0.14553	0.0137	0.75057	0
LOC4341288	2.72	2.3	3.04	3.41	3.46	3.04	3.71	3.71	3.65	3.94	4.03	3.57	2.687	3.303	3.69	3.847	0.31682	0.01617	0.14846	0.26654	0.20468	0.10205
LOC4343048	8.31	8.15	8.09	7.7	10.06	9.34	13.41	12.15	12.86	10.36	12.75	9.76	8.183	9.033	12.807	10.957	0.15913	0.03904	0.49687	0	0.26838	0.00016
LOC4340851	17.23	16.07	17.88	20.55	23.18	20.19	18.95	19.46	17.17	19.91	19.81	18.85	17.06	21.307	18.527	19.523	0.33627	0	-0.20507	2e-05	-0.14003	0.00358
LOC112939677	0.16	0	0	0.63	0.16	0	0	0	0	0	0	0	0.053	0.263	0	0	2.36677	0.10436	-3.33733	0.06239	-3.34177	0.05636
LOC4333995	0.03	0.02	0.03	0	0.03	0.03	0	0.05	0	0.05	0.13	0.08	0.027	0.02	0.017	0.087	-0.54013	0.71523	-0.0154	0.99952	2.30209	0.02567
LOC4333949	0.07	0	0	0.14	0	0.07	0.07	0.07	0	0	0	0.21	0.023	0.07	0.047	0.07	1.6298	0.33725	-0.60036	0.71157	-0.01984	0.99568
LOC4341964	19.65	15.87	16.88	21.11	20.86	15.18	14.73	16.43	15.53	21.84	22.41	19.84	17.467	19.05	15.563	21.363	0.14158	0.00554	-0.29711	0	0.14189	0.00403
LOC4334501	18.34	18.15	20.52	11.86	13.01	14.37	20.19	13.44	15.59	9.73	8.32	9.53	19.003	13.08	16.407	9.193	-0.50509	0	0.31138	9e-05	-0.52843	0
LOC9269090	0	0.04	0.04	0.04	0.08	0.19	0.04	0.04	0	0.27	0.31	0.15	0.027	0.103	0.027	0.243	2.04484	0.05875	-2.0154	0.07422	1.22809	0.04978
LOC107276593	0.14	0.09	0.19	0.7	0.68	0.42	0.99	0.52	0.42	0.14	0.43	0.23	0.14	0.6	0.643	0.267	2.12284	1e-05	0.09423	0.82159	-1.1803	0.00586
LOC4331798	35.86	33.72	32.1	51.88	54.5	52	38.77	44.7	43.04	54.04	55.04	60.83	33.893	52.793	42.17	56.637	0.66898	0	-0.33722	0	0.08411	0.02488
LOC4335882	371.14	388.87	385.23	311.28	301.44	347.78	432.58	327.1	322.89	200.95	171.15	165.12	381.747	320.167	360.857	179.073	-0.19405	0	0.14448	0	-0.87483	0
LOC4336118	15.92	16.58	15.84	11.89	16.42	15.49	18.61	14.98	15.57	14.11	11.73	10.7	16.113	14.6	16.387	12.18	-0.13518	0.00718	0.16387	0.00136	-0.26745	0
LOC4332596	45.79	47.05	50.82	46.29	33.3	40.15	48.56	58.69	63.58	44.71	49.52	46.71	47.887	39.913	56.943	46.98	-0.24102	0	0.50071	0	0.22047	0
LOC112939379	0	0.01	0	0	0.03	0	0.01	0	0	0	0	0	0.003	0.01	0.003	0	1.04484	0.5885	-1.0154	0.62983	NA	NA
LOC107277410	27.2	25.06	28.01	31.35	15.71	23.12	34.62	35.78	37.11	7.76	5.68	5.18	26.757	23.393	35.837	6.207	-0.14437	0.03577	0.58802	0	-1.94583	0
BGIG39947_31972	1.8	1.66	1.27	1.49	1.66	1.46	1.81	1.4	1.46	1.83	1.97	1.72	1.577	1.537	1.557	1.84	-0.03054	0.83583	0.01576	0.9321	0.25836	0.0505
LOC4347501	4.41	4.21	4.93	4.09	6	4.09	6.54	4.23	4.64	4.25	5.37	5.16	4.517	4.727	5.137	4.927	0.09138	0.52873	0.11061	0.45821	0.04728	0.75582
LOC4352566	37.96	39.6	40.6	47.13	32.79	30.88	31.73	40.41	41.56	35.13	38.87	37.38	39.387	36.933	37.9	37.127	-0.08018	0.00103	0.02995	0.27514	-0.00173	0.96142
LOC9271063	0.09	0.03	0.09	0.09	0.42	0.22	0.22	0.16	0.25	0.5	0.16	0.46	0.07	0.243	0.21	0.373	1.76104	0.00318	-0.21703	0.69102	0.62652	0.13175
LOC9271256	0.81	0.64	0.54	0.97	1.35	1.01	1.5	1.26	1.2	2.24	2.89	2.38	0.663	1.11	1.32	2.503	0.72291	2e-05	0.27148	0.0739	1.20667	0
LOC4328143	10.11	10.88	13.75	6.12	6.69	6.6	7.26	6.79	5.98	1.35	0.79	1.03	11.58	6.47	6.677	1.057	-0.82341	0	0.03774	0.71108	-2.62137	0
LOC4343932	28.32	30.74	28.25	32.7	29.94	28.22	25.87	31.92	30.26	26.36	28.85	27.43	29.103	30.287	29.35	27.547	0.08705	0.09843	-0.06018	0.29103	-0.15493	0.00343
LOC4343716	3.16	2.06	1.16	2.78	2.43	1.39	1.42	1.31	0.96	1.91	2.34	3.07	2.127	2.2	1.23	2.44	0.14288	0.71445	-0.8687	0.04297	0.10276	0.79656
LOC107275376	0.6	0.66	0.12	1.02	1.16	0.97	1.04	1.43	1.12	0.18	0.37	0.39	0.46	1.05	1.197	0.313	1.20778	0	0.18075	0.43088	-1.75214	0
LOC4328207	13.38	13.92	13.17	16.17	22.38	21.25	18.21	18.81	17.81	20.02	18.84	17.79	13.49	19.933	18.277	18.883	0.57148	0	-0.13759	0.00296	-0.07964	0.08672
LOC112938248	0	0	0	0	0	0	0	0	0	0.3	0	0	0	0	0	0.1	NA	NA	NA	NA	NA	NA
LOC4327274	12.38	9.82	9.79	6.88	6.89	11.94	22.26	14.82	16.15	1.37	1.23	1.53	10.663	8.57	17.743	1.377	-0.29237	0.00011	1.03759	0	-2.65335	0
LOC4333492	0.03	0	0	0.18	0.18	0.3	0	0.03	0	0.03	0	0.03	0.01	0.22	0.01	0.02	4.50427	0	-4.47483	1e-05	-3.47927	2e-05
LOC9270797	0.42	0.85	1.22	1.43	0.87	2.25	2.53	3.03	1.7	0.4	0.25	0.4	0.83	1.517	2.42	0.35	0.89733	1e-05	0.65682	5e-05	-2.14275	0
LOC4336657	12.93	11.8	10.68	11.43	10.03	11.09	18.99	18.95	19.03	108.02	147.3	121.15	11.803	10.85	18.99	125.49	-0.10933	0.03329	0.8012	0	3.52364	0
LOC4335132	5.47	4.97	5.17	6.98	3.12	4.84	4.99	5.44	5.81	3.09	4.31	4.25	5.203	4.98	5.413	3.883	-0.04512	0.54443	0.10817	0.14478	-0.37278	0
LOC4340149	1.15	1.37	1.82	1.48	0	1.12	0.42	1.23	0.74	0.21	0.78	0.72	1.447	0.867	0.797	0.57	-0.69586	0.00414	-0.15309	0.64396	-0.64697	0.04116
LOC4341916	0.44	0.68	0.15	4.41	11.75	5.73	1.96	2.27	1.52	7.32	8.03	7.59	0.423	7.297	1.917	7.647	4.12903	0	-1.92967	0	0.06281	0.57402
LOC4332506	93.51	103.99	125.93	33.26	10.61	27.11	37.35	29.98	46.34	7.14	6.85	11.01	107.81	23.66	37.89	8.333	-2.16225	0	0.66233	0	-1.52352	0
LOC107277583	0.88	0.62	0.87	1.19	1.08	1.42	1.9	1.33	1.38	0.95	0.76	0.81	0.79	1.23	1.537	0.84	0.65489	0.00283	0.31645	0.11358	-0.55589	0.0119
LOC4346296	0.83	0.6	1.42	0.6	0.28	0.49	0.99	1.34	0.55	0.11	0.22	0.27	0.95	0.457	0.96	0.2	-1.01175	0.00433	1.04119	0.00424	-1.20426	0.02457
LOC107278494	0	0	0	0	0	0	0.07	0	0.07	0.14	0	0	0	0	0.047	0.047	NA	NA	NA	NA	NA	NA
LOC4337007	27.18	26.99	25.39	21.87	31.74	26.15	31.41	24.07	24.67	31.22	34.13	29.78	26.52	26.587	26.717	31.71	0.02712	0.63356	-0.00209	0.98625	0.24112	0
LOC4325466	0.06	0.19	0.37	0.07	0.13	0.43	0.14	0.44	0.19	0.44	0.76	0.97	0.207	0.21	0.257	0.723	0.05633	0.94716	0.26942	0.72478	1.76277	0.00036
LOC4338830	0.34	0.2	0.2	0.14	0.5	0.34	0.27	0.28	0.41	0.27	0.21	0.27	0.247	0.327	0.32	0.25	0.39276	0.54569	-0.0154	0.99383	-0.36776	0.58735
LOC107281160	0.01	0.01	0.01	0	0	0.01	0	0	0.05	0.01	0.02	0.04	0.01	0.003	0.017	0.023	-1.53048	0.53403	2.68947	0.18939	2.81609	0.1452
LOC4328653	0.06	0	0.03	0.08	0.03	0	0	0.04	0.13	0.07	0.05	0.09	0.03	0.037	0.057	0.07	0.32837	0.76864	0.67348	0.49433	0.94686	0.28098
LOC4340339	1.19	1.25	1.3	2.05	2.4	1.89	1.25	1.67	2	1.78	2.54	1.94	1.247	2.113	1.64	2.087	0.76894	0	-0.36641	0.00386	-0.02294	0.86914
LOC4341760	8.13	6.77	7.57	5.67	4.45	6.52	6.19	4.47	5.81	4.1	4.54	5.14	7.49	5.547	5.49	4.593	-0.38409	1e-05	0.04472	0.68374	-0.20097	0.04356
LOC4333710	0.25	0.31	0.25	0.06	0.32	0.25	0.37	0.44	0.37	0.25	0.32	0.12	0.27	0.21	0.393	0.23	-0.33367	0.62272	0.9106	0.14025	0.11767	0.8818
LOC112939902	0	0	0	0	0	0	0.08	0	0	0	0	0	0	0	0.027	0	NA	NA	NA	NA	NA	NA
LOC9271033	113.34	95.61	108.53	90.15	48.07	61.56	152.41	104.9	125.12	59.99	55.68	57.28	105.827	66.593	127.477	57.65	-0.63019	0	0.91629	0	-0.23293	0
LOC4348040	0	0	0	0.02	0	0	0	0	0.02	0	0	0	0	0.007	0.007	0	NA	NA	-0.0154	0.99773	NA	NA
LOC4333727	18.89	17.19	17.69	27.14	20.85	16.81	16.05	19.64	19.92	20.57	24.34	23.67	17.923	21.6	18.537	22.86	0.26838	0	-0.23875	0	0.07053	0.00178
LOC4334117	8.96	9.67	9.35	11.78	11.64	10.47	8.68	10.75	11.22	11.14	11.75	11.66	9.327	11.297	10.217	11.517	0.28693	0	-0.14899	0.00625	0.02125	0.71468
LOC4342978	4.29	4.25	3.99	7.53	8.69	6.01	4.7	5.58	5.25	7.96	8.32	7.43	4.177	7.41	5.177	7.903	0.82796	0	-0.51527	0	0.09308	0.06451
LOC4339158	6	6.8	7.8	7.55	10.4	10.07	10.4	8.09	9.97	10.13	9.2	9.64	6.867	9.34	9.487	9.657	0.47608	0	0.0032	0.98232	0.03524	0.65107
LOC9272014	4.01	3.63	4.2	4.56	4.17	4.35	4.38	4.61	5.34	5.45	4.37	4.74	3.947	4.36	4.777	4.853	0.16871	0.18197	0.11961	0.36102	0.13991	0.26045
LOC4352640	16.11	16.46	17.11	21.16	20.08	18.1	27.42	34.17	31.18	25	28.37	26.73	16.56	19.78	30.923	26.7	0.27147	0	0.63688	0	0.42438	0
LOC4331505	15.89	14.75	16.15	21.59	22.93	20.08	18.76	20.91	20.25	18.03	19.41	17.46	15.597	21.533	19.973	18.3	0.47695	0	-0.11351	0.00621	-0.24173	0
LOC4345839	492.14	486.19	515.08	417.99	336.64	367.7	455.03	414.22	458.58	279.74	261.17	254.08	497.803	374.11	442.61	264.997	-0.3709	0	0.22191	0	-0.52311	0
LOC4341530	0.47	0.74	0.85	0.84	2.08	1.53	1.1	0.85	1.07	2.34	1.88	1.92	0.687	1.483	1.007	2.047	1.15866	0	-0.59539	0.00295	0.4513	0.00635
LOC4326932	1.4	1.18	0.9	15.59	14.32	10.66	5.58	9.08	7.33	18.87	24.47	17.39	1.16	13.523	7.33	20.243	3.57733	0	-0.89582	0	0.56566	0
LOC107276978	0	0	0	0	0	0.03	0	0	0	0	0	0	0	0.01	0	0	NA	NA	NA	NA	NA	NA
LOC4338649	1.11	0.99	2.49	1.87	2.82	2.97	3.12	2.42	1.73	3.01	1.69	2.21	1.53	2.553	2.423	2.303	0.76783	0.00017	-0.09106	0.67631	-0.16367	0.4204
LOC4324204	8.26	8.67	8.41	7.58	12.69	12.59	9.27	8.5	6.84	11.31	8.69	9.73	8.447	10.953	8.203	9.91	0.38087	0	-0.41865	0	-0.14665	0.00548
LOC107276422	0	0	0	0	0	0	0	0	0	0	0.03	0	0	0	0	0.01	NA	NA	NA	NA	NA	NA
LOC4324389	12.3	11.99	12.44	13.23	17.67	17.59	16.39	15.69	14.31	17.53	16.6	15.87	12.243	16.163	15.463	16.667	0.4366	0	-0.08823	0.06507	0.02142	0.66824
LOC4352409	3.74	2.94	4.04	3.88	3.7	2.4	2.35	2.64	2.77	2.34	2.53	2.92	3.573	3.327	2.587	2.597	-0.13841	0.28484	-0.21922	0.12337	-0.30017	0.02944
LOC4346191	0.95	0.88	1	0.89	1.19	0.96	1.11	1.04	1.21	1.22	1.17	1.02	0.943	1.013	1.12	1.137	0.10181	0.55471	0.1438	0.40813	0.16779	0.30932
LOC4325864	0.11	0.16	0.04	0.02	0.12	0.09	0.09	0.02	0.18	0.05	0.02	0.02	0.103	0.077	0.097	0.03	-0.44059	0.50541	0.36311	0.62521	-1.34177	0.13021
LOC107278746	0	0	0	0	0.15	0	0	0	0.1	0.5	0.11	0	0	0.05	0.033	0.203	3.36677	0.05016	-0.54239	0.65855	2.01085	0.00297
LOC4326749	87.55	85.79	93.74	125.32	110.06	111.32	127.47	110.33	105.87	107.09	105.97	92.31	89.027	115.567	114.557	101.79	0.45593	0	-0.05439	0.14115	-0.15793	1e-05
LOC4351913	0.84	1.17	1.09	0.89	0.12	0.68	1.85	2.96	3.55	0.1	0.09	0.11	1.033	0.563	2.787	0.1	-0.89364	0	2.36162	0	-2.45513	0
LOC9268882	33.12	32.2	32.07	43.51	66.31	59.14	48.61	49.72	44.1	57.17	58.88	56.3	32.463	56.32	47.477	57.45	0.80416	0	-0.26504	0	0.04385	0.12283
LOC4344785	50	46.06	49.15	39.29	37.29	37.92	46.02	50.6	46.24	25.87	25.83	25.35	48.403	38.167	47.62	25.683	-0.28246	0	0.27634	0	-0.53907	0
LOC4341573	19.79	19.89	20.93	28.46	31.42	27.3	22.02	27.15	23.43	16.27	14.32	12.63	20.203	29.06	24.2	14.407	0.49623	0	-0.26973	0	-1.02516	0
LOC9266402	1.45	0.77	0.66	2.5	3.06	2.95	1.19	1.67	1.44	4.06	5.16	4.15	0.96	2.837	1.433	4.457	1.6298	0	-1.0154	0.00048	0.61362	0.00507
LOC4349035	6.09	5.35	5.35	8.38	12.92	9.27	12.71	11.36	11.47	16.58	16.09	14.62	5.597	10.19	11.847	15.763	0.88242	0	0.21174	0.0059	0.62063	0
LOC4342652	13.27	16.27	13.02	14.87	19.21	17.43	10.53	13.17	12.35	19.32	20.85	20.48	14.187	17.17	12.017	20.217	0.29362	0	-0.52247	0	0.22554	4e-05
LOC4331865	4.05	3.38	4.08	5.04	4.35	4.29	4.77	5.33	5.36	4.76	5.29	4.93	3.837	4.56	5.153	4.993	0.25856	0.0002	0.17198	0.01094	0.12358	0.07017
LOC4340716	6.32	6.37	5.95	13.27	9.48	8.11	4.75	6.77	5.93	10.48	12.87	12.49	6.213	10.287	5.817	11.947	0.73593	0	-0.82868	0	0.20924	0
LOC4325124	3.95	4.78	2.73	2.67	2.43	3.15	3.54	3.64	2.78	1.77	1.02	1.61	3.82	2.75	3.32	1.467	-0.45486	0.00018	0.26053	0.05217	-0.91938	0
LOC9272522	0.09	0.22	0.15	0.12	0	0.03	0	0.06	0.03	0.03	0.03	0.03	0.153	0.05	0.03	0.03	-1.54013	0.03544	-0.75236	0.54755	-0.7568	0.52782
LOC4326418	4	3.35	3	5.72	6.75	5.99	4.86	5.37	4.71	6.78	5.51	3.88	3.45	6.153	4.98	5.39	0.84792	0	-0.31189	0.00221	-0.20193	0.04497
LOC4333707	0.16	0.16	0.24	0.28	0.76	0.12	0.33	0.37	0.41	0.45	0.41	0.2	0.187	0.387	0.37	0.353	1.04484	0.03081	-0.06786	0.89798	-0.12675	0.78872
LOC4336707	13.05	11.48	12.36	7.23	8.25	7.39	9.16	8.15	8.93	8.31	6.34	6.45	12.297	7.623	8.747	7.033	-0.67679	0	0.19278	0.00659	-0.12413	0.10156
LOC4339265	22.43	23.28	19	29.5	34.57	32.83	31.16	31.4	28.91	37.07	29.5	30.36	21.57	32.3	30.49	32.31	0.55679	0	-0.08487	0.03775	-0.00671	0.88507
LOC4330161	0.86	0.79	0.52	27.86	50.03	27.7	6.4	9.39	9.55	77.28	91.18	71.72	0.723	35.197	8.447	80.06	5.56751	0	-2.0432	0	1.17833	0
LOC112935991	11.18	14.04	12.24	11.6	13.12	11.34	9.19	10.14	10.8	9.3	10.13	10.03	12.487	12.02	10.043	9.82	-0.03762	0.59182	-0.26707	0.00013	-0.30164	1e-05
LOC107276791	0.41	0.44	0.39	0.76	1.43	1.29	1.43	1.18	1.07	1.1	0.6	0.69	0.413	1.16	1.227	0.797	1.48341	0	0.086	0.61576	-0.53641	0.00102
LOC4328007	54.93	58.57	55.44	41.41	54	52.28	65.95	55.99	61.63	46.18	40.42	38.73	56.313	49.23	61.19	41.777	-0.165	3e-05	0.30106	0	-0.25372	0
LOC4324516	108.19	116.31	91.69	91.19	83.55	90.3	86.42	80.9	85.71	62.43	51.7	52.73	105.397	88.347	84.343	55.62	-0.22629	0	-0.08111	0.00681	-0.68491	0
BGIG39947_32057	2.9	3.06	2.28	0.97	0.96	1.53	1.36	1.51	1.45	1.48	1.16	1.99	2.747	1.153	1.44	1.543	-1.23651	0	0.31284	0.08705	0.41351	0.01644
LOC4345202	2.16	2.24	2.08	5.01	3.92	3.01	2.4	3.04	3.01	4.19	4.89	4.23	2.16	3.98	2.817	4.437	0.89097	0	-0.50509	0	0.14831	0.02103
LOC4340213	0.4	0.17	0.08	0.45	0.47	0.49	0.6	0.52	0.28	0.77	0.89	0.77	0.217	0.47	0.467	0.81	1.13599	0.00193	-0.0154	0.97896	0.77484	0.00387
LOC4329455	23.34	21.36	20.46	26.14	25.68	22.98	22.52	22.65	23.26	27.19	29.11	27.62	21.72	24.933	22.81	27.973	0.20556	0	-0.12878	0.0002	0.13896	2e-05
LOC4340680	104.65	117.79	114.49	122.7	114.58	116.95	162.44	129.43	134.16	90.42	85.11	84.1	112.31	118.077	142.01	86.543	0.12663	0.00034	0.2409	0	-0.48118	0
LOC4351270	1.37	1.52	1.62	2	2.22	1.84	1.51	1.79	1.1	3.88	2.82	3.11	1.503	2.02	1.467	3.27	0.4397	0.00491	-0.47398	0.00343	0.68424	0
LOC4340457	39.59	38.89	38.88	42.53	50.82	47.69	54.52	54.85	49.63	51.02	47.25	49.84	39.12	47.013	53	49.37	0.27928	0	0.16617	0	0.06366	0.05292
LOC4350329	3.94	4.46	3.77	6.58	7.66	6.75	5.87	7.3	5.31	7.27	7.3	7.14	4.057	6.997	6.16	7.237	0.8299	0	-0.18858	0.04341	0.01982	0.84463
LOC4342086	1.57	2.46	1.39	4.01	4.42	5.89	0.23	0.34	0.84	2.2	1.54	1.45	1.807	4.773	0.47	1.73	1.43361	0	-3.36023	0	-1.48496	0
LOC4332723	5.9	5.9	5.59	3.63	6.14	4.75	7.87	5.5	5.94	3.64	3.25	2.74	5.797	4.84	6.437	3.21	-0.24318	0.00136	0.41438	0	-0.5825	0
LOC4347494	5.1	5.17	5.85	2.93	3.53	2.6	4.12	3.63	4.14	3.57	3.81	3.93	5.373	3.02	3.963	3.77	-0.81835	0	0.3893	0.00061	0.31395	0.00628
LOC4344772	15.28	15.49	16.02	15.44	20.42	14.84	19.14	19.59	18.12	22.56	19.64	21.56	15.597	16.9	18.95	21.253	0.12336	0.04855	0.15935	0.00887	0.32008	0
LOC4324843	8.75	9.53	8.71	7.19	6.15	6.96	8.78	9.25	8.78	6.91	4.88	5.24	8.997	6.767	8.937	5.677	-0.39299	0	0.39126	0	-0.26503	0.00188
LOC4331742	89.58	88.57	94.85	105.84	127.81	126.93	167.96	138.66	124.84	81.92	76.59	73.36	91	120.193	143.82	77.29	0.50267	0	0.21348	0	-0.69763	0
LOC107280253	0	0	0	0	0.19	0	0.03	0.03	0.03	0.03	0	0.04	0	0.063	0.03	0.023	3.6298	0.02634	-1.0154	0.38091	-1.6048	0.18412
LOC4349932	177.49	178.63	199.91	116.7	30.48	61.76	90.21	109.32	99.66	35.15	25.09	43.61	185.343	69.647	99.73	34.617	-1.35169	0	0.47523	0	-1.04378	0
LOC4342934	19.93	18.8	20.09	17.87	18.99	17.24	23.01	21.54	19.16	14.02	13.01	12.94	19.607	18.033	21.237	13.323	-0.10151	0.05327	0.22795	1e-05	-0.45683	0
LOC4326455	5.72	4.8	5.44	4.71	7.08	5.77	5.14	5.14	4.75	6.38	6.11	5.24	5.32	5.853	5.01	5.91	0.13916	0.04205	-0.22683	0.00124	0.01211	0.8789
LOC4345543	2.27	2.14	1.92	1.85	1.94	1.39	1.85	1.72	1.51	2.43	2.38	2.21	2.11	1.727	1.693	2.34	-0.27164	0.09654	-0.03366	0.87571	0.42883	0.00686
LOC4349078	2.87	3.39	2.3	7.08	12.74	9.36	14.27	13.02	12.07	7.37	6.29	6.09	2.853	9.727	13.12	6.583	1.80227	0	0.41982	1e-05	-0.57962	0
LOC4351940	6.49	6.71	6	1.37	1.2	1.43	1.58	0.94	1.23	2.23	1.46	1.54	6.4	1.333	1.25	1.743	-2.24538	0	-0.31014	0.07676	0.33924	0.02479
LOC4352529	89.14	80.93	88.38	95.22	98.31	99.81	135.66	105.55	116.95	95.01	89.03	77.98	86.15	97.78	119.387	87.34	0.22194	0	0.26993	0	-0.18689	0
LOC4325173	116.98	115.08	120.55	135.69	119.55	117.23	162.98	116.56	121.92	86.65	83.46	78.31	117.537	124.157	133.82	82.807	0.15014	0.00014	0.07725	0.05777	-0.62694	0
LOC4343049	320.35	304.33	300.05	354.78	334.99	273.59	217.74	291.1	273.72	384.74	397.16	410.4	308.243	321.12	260.853	397.433	0.06734	0	-0.30351	0	0.30253	0
LOC4337619	12.4	12.63	12.68	16.49	16.19	16.46	12.64	16.09	16.42	16.51	18.72	17	12.57	16.38	15.05	17.41	0.39276	0	-0.12676	0.00493	0.08135	0.06304
LOC4347700	1.58	1.67	1.61	3.74	7.23	5.87	6.06	5.27	3.53	6.28	4.31	5.46	1.62	5.613	4.953	5.35	1.80693	0	-0.18281	0.07826	-0.07252	0.49217
LOC4336295	0	0.11	0	0	0	0	0	0	0	0	0	0	0.037	0	0	0	NA	NA	NA	NA	NA	NA
LOC107278919	0	0	0.11	0.05	0.5	0	0	0.16	0.05	0.27	0.43	0.37	0.037	0.183	0.07	0.357	2.36677	0.01972	-1.33733	0.14254	0.98016	0.0965
LOC9270822	0.05	0.09	0.04	0.04	0.14	0.09	0.14	0.18	0.23	0.05	0	0	0.06	0.09	0.183	0.017	0.6298	0.54262	0.9846	0.21784	-2.6048	0.06448
LOC4332161	7.67	8.6	8	15.94	19.99	16.38	16.21	16.76	16.6	16.74	14.42	14.52	8.09	17.437	16.523	15.227	1.12122	0	-0.08243	0.13262	-0.20235	0.0001
LOC4326887	1386.64	1580.11	1376.73	2453.92	2272.54	2533.19	1361.87	1722.5	1601	2062.14	1686.48	1846.7	1447.83	2419.88	1561.79	1865.11	0.77421	0	-0.64903	0	-0.39575	0
LOC9271885	0.98	1.23	1.49	12.05	1.28	5.06	1.4	3.04	2.04	6.62	6.29	6.14	1.233	6.13	2.16	6.35	2.37362	0	-1.54667	0	0.00726	0.97498
LOC4342542	21.09	25.29	23.87	18.96	14.93	19.47	30.54	36.32	35.71	7.28	6.46	5.09	23.417	17.787	34.19	6.277	-0.3789	0	0.9328	0	-1.51481	0
LOC4329483	0.28	0.28	0.11	0.25	0.22	0.57	0.39	1.04	0.61	0.57	0.25	0.92	0.223	0.347	0.68	0.58	0.65489	0.14746	0.95951	0.0052	0.73689	0.03898
LOC4342350	172.52	165.33	165.23	151.42	106.1	126.93	126.84	140.72	153.96	129.77	149.47	143.78	167.693	128.15	140.507	141.007	-0.36579	0	0.12553	0	0.12369	0
LOC4337195	19.38	16.95	16	12.67	12.69	12.76	7.12	8.72	9.45	17.24	13.88	15.36	17.443	12.707	8.43	15.493	-0.43715	0	-0.60103	0	0.27428	1e-05
LOC4335720	0.16	0.19	0.04	1.08	2.1	1.83	0.47	0.24	0.27	0.24	0.04	0.16	0.13	1.67	0.327	0.147	3.71159	0	-2.36023	0	-3.54909	0
LOC4349099	60.62	65.81	62.1	41.74	38.01	38.8	57.39	52.34	54.47	34.68	33.22	35.03	62.843	39.517	54.733	34.31	-0.61246	0	0.4818	0	-0.23002	0
LOC107276686	0	0	0	0	0	0	0	0	0.07	0.87	0.44	0.14	0	0	0.023	0.483	NA	NA	NA	NA	5.30209	1e-05
LOC4345234	73.61	71.02	68.85	44.58	46.1	48.69	59.11	56.7	62.58	40.33	41.95	38.4	71.16	46.457	59.463	40.227	-0.59414	0	0.34564	0	-0.22078	0
LOC4344156	2.88	2.8	2.66	4.45	3.69	4.39	3.19	2.35	2.5	3.56	3.55	4.19	2.78	4.177	2.68	3.767	0.6038	0	-0.64927	0	-0.16055	0.11715
LOC4332026	13.46	13.73	13.74	14.48	13.34	11.71	11.18	13.07	13.91	13.73	16.34	15.16	13.643	13.177	12.72	15.077	-0.04215	0.2623	-0.05434	0.17418	0.18889	0
LOC4344139	44.04	47.18	44.35	62.89	64.3	61.05	52.9	69.82	71.17	69.05	72.41	66.13	45.19	62.747	64.63	69.197	0.48895	0	0.03577	0.20694	0.13163	0
LOC107275395	0.42	0.32	0.28	0.32	0.43	0.65	0.61	0.66	0.51	0.51	0.24	0.28	0.34	0.467	0.593	0.343	0.4923	0.26086	0.32564	0.43212	-0.4673	0.29974
LOC4342069	0.14	0.12	0.25	0.14	0.32	0.14	0.07	0	0.14	2.23	2.39	0.99	0.17	0.2	0.07	1.87	0.21476	0.78943	-1.60036	0.10939	3.30209	0
LOC4331549	5.17	6.74	5.29	11.96	11.82	12.7	5.88	5.93	6.15	12.11	15.24	13.18	5.733	12.16	5.987	13.51	1.11501	0	-1.03696	0	0.13238	0.11255
LOC4334290	85.49	90.28	89.08	86.38	62.18	73.59	64.76	74.01	74.07	85.67	97.95	97.53	88.283	74.05	70.947	93.717	-0.25592	0	-0.07976	0.00082	0.33089	0
LOC4331281	0.75	0.72	0.59	1.46	1.78	1.36	1.67	1.5	1.56	0.58	0.78	0.41	0.687	1.533	1.577	0.59	1.12345	0	0.02767	0.86665	-1.37773	0
LOC4351855	0.63	0.95	0.88	0.25	0.13	0.31	0.04	0.09	0.04	0.02	0.02	0.04	0.82	0.23	0.057	0.027	-1.80527	0	-2.0934	3e-05	-3.26777	0
LOC107277509	0	0	0	0.12	0.12	0.12	0.08	0	0.08	0.08	0.24	0.19	0	0.12	0.053	0.17	4.21476	0.00393	-1.18532	0.21162	0.51068	0.4727
LOC4342022	458.02	418.49	442.8	529.12	521.04	493.9	638.24	527.78	524.96	357.05	333.48	308.44	439.77	514.687	563.66	332.99	0.26306	0	0.11438	0	-0.64983	0
LOC107277917	0.06	0.41	0.06	0.23	0.24	0.29	0.18	0.06	0.18	0.06	0.18	0.12	0.177	0.253	0.14	0.12	0.57535	0.39984	-0.90848	0.22794	-1.13532	0.13023
LOC4346013	36.08	37.09	38.41	29.7	37.14	33.92	39.1	33.78	36.44	31.8	29.79	29	37.193	33.587	36.44	30.197	-0.11875	0.00622	0.12143	0.00678	-0.16889	0.00023
LOC4339792	17.6	17.85	17.17	21.75	24.36	21.98	18.8	21.49	21.16	30.02	31.27	28.81	17.54	22.697	20.483	30.033	0.39323	0	-0.15742	0.00416	0.39151	0
LOC9272074	1.04	1.27	0.78	2.24	2.16	1.96	1	1.45	1.58	13.9	15.99	16.87	1.03	2.12	1.343	15.587	1.08281	0	-0.71233	0.00028	2.8478	0
LOC4340210	13.09	13.83	13.09	16.83	19.17	17.27	14.35	17.01	14.8	19.76	22.03	19.03	13.337	17.757	15.387	20.273	0.44067	0	-0.21227	0	0.22864	0
LOC4336556	3.13	4.17	3.38	8.85	11.5	10.38	10.24	10.32	8.2	4.8	2.75	3.81	3.56	10.243	9.587	3.787	1.55153	0	-0.10884	0.27444	-1.45004	0
LOC4339484	26.91	21.14	24.18	18.25	20.13	20.59	32.7	29.1	23.71	10.12	13.03	12.41	24.077	19.657	28.503	11.853	-0.27145	0	0.52317	0	-0.74391	0
LOC9269110	0.6	0.77	0.86	0.8	0.87	2.66	3.24	3.3	2.49	0	0	0.03	0.743	1.443	3.01	0.01	0.97589	0	1.04873	0	-7.17971	0
LOC4331284	31.89	33.26	30.37	68.21	68.04	53.12	35.81	41.31	34.29	52.37	52.58	52.41	31.84	63.123	37.137	52.453	1.01476	0	-0.77837	0	-0.28291	0
LOC9270033	0.06	0	0.01	0	0.03	0.05	0.04	0.02	0.03	0.06	0.03	0.02	0.023	0.027	0.03	0.037	0.26723	0.77066	0.17725	0.85619	0.34273	0.68866
LOC4344465	3.68	5	4.21	3.31	6.15	6.09	7.21	5.65	4.89	5.46	2.68	4.96	4.297	5.183	5.917	4.367	0.29393	0.0212	0.18075	0.15283	-0.25788	0.0477
LOC4337399	18.55	19.16	17.06	19.39	23.37	23.87	22.64	19.77	20.42	19.73	19.78	19.68	18.257	22.21	20.943	19.73	0.30157	0	-0.09322	0.08214	-0.1817	0.00041
LOC4327048	14.93	14.94	15.5	33.88	50.82	41.17	61.09	45.44	44.89	24.38	18.79	18.77	15.123	41.957	50.473	20.647	1.49982	0	0.25587	0	-1.03778	0
LOC4327230	4.48	4.1	4.64	5.5	9.35	7.86	6.76	7.35	6.69	7.47	8.27	8.84	4.407	7.57	6.933	8.193	0.79207	0	-0.12997	0.11447	0.1096	0.15713
LOC4333211	0.14	0.16	0.18	0.23	0.11	0.05	0.04	0.16	0.07	0.14	0.29	0.18	0.16	0.13	0.09	0.203	-0.25062	0.58917	-0.56794	0.30533	0.60819	0.15543
LOC4345893	25.71	26.8	25.2	29.6	27.16	20.98	24.44	23.27	32.5	30.2	37.65	31.46	25.903	25.913	26.737	33.103	0.02311	0.54021	0.04445	0.24493	0.34435	0
LOC9268686	1.9	2.27	1.78	3.14	2.99	2.44	2.28	2.7	2.52	2.85	3.12	2.67	1.983	2.857	2.5	2.88	0.53547	0	-0.1951	0.04673	0.00592	0.9635
LOC4328685	25.84	24.06	23.99	30.18	26.87	29.92	27.57	34.55	33.88	39.08	53.83	46.07	24.63	28.99	32	46.327	0.2516	0	0.13432	0.00028	0.66553	0
LOC4330115	12.96	13.9	10.9	17.32	21.19	21.58	22.18	24.32	19.96	18.95	20.97	22.75	12.587	20.03	22.153	20.89	0.69284	0	0.13457	0.01895	0.04788	0.43308
LOC9268573	0.1	0.16	0.07	0	0.07	0.16	0.07	0.07	0.13	0.03	0.07	0.1	0.11	0.077	0.09	0.067	-0.46974	0.55282	0.17725	0.85619	-0.24223	0.80273
LOC4351504	0.21	0.29	0.22	0.35	0.42	0.25	0.52	0.68	0.46	0.77	0.8	0.58	0.24	0.34	0.553	0.717	0.60283	0.06588	0.59653	0.03008	1.14706	0
LOC107281594	0	0	0	0	0.16	0	0	0	0.16	0.31	0	0	0	0.053	0.053	0.103	NA	NA	-0.0154	0.99773	0.98016	0.6253
LOC4347589	12.9	12.62	11.85	11.89	10.19	11.46	11.98	14.76	15.48	13.67	15.49	12.03	12.457	11.18	14.073	13.73	-0.13512	0.04419	0.32102	0	0.28204	1e-05
LOC4340259	1.91	0.76	0.21	0	0.48	0.07	0.07	0	0.14	1.24	0.78	0.42	0.96	0.183	0.07	0.813	-2.34748	0	-1.43043	0.17021	2.10944	5e-05
LOC4333618	5.62	5.6	5.94	5.38	6.75	4.07	5.61	3.92	4.78	11.21	14.14	9.93	5.72	5.4	4.77	11.76	-0.06619	0.54339	-0.18447	0.10461	1.11303	0
LOC4340368	0.04	0.04	0.15	0.08	0.04	0.04	0.19	0.2	0.23	0.16	0.27	0.04	0.077	0.053	0.207	0.157	-0.54013	0.60249	1.9846	0.01081	1.56512	0.06159
LOC4325585	3.66	4.52	4.13	9.09	8.07	7.05	7.57	8.77	8.51	16.29	16.79	15.72	4.103	8.07	8.283	16.267	0.98897	0	0.03152	0.67709	1.00316	0
LOC9266130	22.09	23.23	20.48	24.56	31.41	35.99	36.24	37.55	33.58	28.54	28.21	29.81	21.933	30.653	35.79	28.853	0.50125	0	0.21513	0	-0.09769	0.02367
LOC4345919	3.26	2.98	2.8	8.18	4.87	6.98	4.65	5.58	4.5	5.17	7.26	6.15	3.013	6.677	4.91	6.193	1.15259	0	-0.45246	1e-05	-0.10423	0.30157
LOC4323909	6.2	5.38	5.57	6	6.93	10.16	2.64	2.15	1.87	3.81	5.63	5.26	5.717	7.697	2.22	4.9	0.46796	9e-05	-1.81271	0	-0.67711	0
LOC4332488	41.11	38.38	38.79	37.29	42.14	38.67	41.49	42.19	38.97	37.16	35.32	34.86	39.427	39.367	40.883	35.78	-0.02697	0.471	0.04449	0.24942	-0.13975	0.00012
LOC4325135	4.28	4.49	4.05	0.77	0.89	1.26	1.89	0.97	1.22	5.28	3.08	2.32	4.273	0.973	1.36	3.56	-2.07715	0	0.45173	0.21995	1.83521	0
LOC4342842	27.62	31.07	28.77	28.17	30.57	27	32.91	32.9	28.02	24.09	20.23	20.24	29.153	28.58	31.277	21.52	0.0093	0.89542	0.11193	0.07906	-0.43208	0
LOC4330409	23.19	20.97	22.23	12.36	13.45	10.93	17.67	16.13	18.54	20.36	23.79	20.5	22.13	12.247	17.447	21.55	-0.84024	0	0.50512	0	0.80734	0
LOC9266735	17.48	18.41	19.77	13.19	15.7	15.45	19.57	18.95	17.78	17.22	16.79	14.75	18.553	14.78	18.767	16.253	-0.31107	0	0.3371	0	0.12693	0.03005
LOC112938629	0	0	0	0.13	0.17	0.23	0.03	0.07	0	0.03	0.1	0.03	0	0.177	0.033	0.053	5.04484	6e-05	-2.43043	0.00339	-1.69791	0.0197
LOC9267506	0.12	0	0	0.12	0	0	0	0.18	0.12	0.6	0.6	0.47	0.04	0.04	0.1	0.557	0.05686	0.96522	1.30173	0.11573	3.79647	0
LOC4326701	6.16	5.99	6.11	10.36	10.53	8.73	7.97	9.85	9.19	10.14	10.79	10.87	6.087	9.873	9.003	10.6	0.70952	0	-0.13994	0.02448	0.09581	0.10876
LOC107275446	0	0	0	0	0	0	0	0	0	0.05	0.05	0	0	0	0	0.033	NA	NA	NA	NA	NA	NA
LOC4333453	26.86	25.49	27.13	25.26	22.11	21.15	20.36	22.35	22.17	20.75	23.39	20.52	26.493	22.84	21.627	21.553	-0.19031	0	-0.08911	0.00365	-0.07481	0.01379
LOC4324191	7.25	6.81	7.27	9.33	8.67	6.17	8.18	8.4	8.52	7.02	7.26	5.66	7.11	8.057	8.367	6.647	0.18957	0.00148	0.05023	0.44251	-0.28488	0
LOC4338814	0	0.04	0	0	0.04	0	0	0	0	0	0	0	0.013	0.013	0	0	0.04484	0.98677	NA	NA	NA	NA
LOC4348926	0.12	0.09	0	0.09	0	0.22	0.03	0.06	0	0.53	1.73	2.47	0.07	0.103	0.03	1.577	0.55941	0.47603	-1.75236	0.06898	3.90616	0
LOC107276164	0.32	0.36	0.43	0.59	0.33	0.8	0.96	0.52	0.56	0.36	0.44	0.51	0.37	0.573	0.68	0.437	0.66375	0.07138	0.23076	0.51876	-0.40171	0.2794
LOC4325643	0.39	0.44	0.66	10.24	15.12	8.36	1.95	3.43	1.67	105.08	122.26	120.5	0.497	11.24	2.35	115.947	4.52117	0	-2.26934	0	3.35511	0
LOC4347667	5.09	3.8	3.21	2.37	3.18	1.89	3.46	1.86	2.16	3.97	4.37	4.36	4.033	2.48	2.493	4.233	-0.60522	1e-05	-0.06049	0.74302	0.73478	0
LOC112939060	0.15	0	0	0	0	0	0.15	0	0	0	0.19	0	0.05	0	0.05	0.063	NA	NA	NA	NA	NA	NA
LOC4329732	1.11	0.76	1.17	0.47	0.67	0.68	1.22	0.65	0.62	0.83	0.54	0.91	1.013	0.607	0.83	0.76	-0.72487	0.00232	0.44618	0.09646	0.31621	0.24853
LOC4328631	42.77	52.84	56.22	44.21	52.08	59.69	64.52	65.87	58.81	31.67	21.15	25.51	50.61	51.993	63.067	26.11	0.11	0.07418	0.24232	2e-05	-1.03586	0
LOC4327575	14.57	15.55	15.48	21.38	17.2	22.18	16.54	18.18	15.42	12.83	12.54	12.03	15.2	20.253	16.713	12.467	0.42975	0	-0.28644	0	-0.71075	0
LOC4337725	440.46	381.88	364.08	194.49	413.98	413.96	325.23	287.63	231.86	349.98	256.77	361.25	395.473	340.81	281.573	322.667	-0.19886	0	-0.28087	0	-0.08491	0
LOC4347619	0.19	0.19	0	4.79	1.41	1.77	0.31	0.94	0.31	3.79	3.78	3.89	0.127	2.657	0.52	3.82	4.4711	0	-2.38277	0	0.4925	0.00459
LOC9267268	5.45	6.1	5.55	7.54	9.2	8.65	7.49	6.6	8.2	14.69	12.91	11.54	5.7	8.463	7.43	13.047	0.62677	3e-05	-0.20978	0.17548	0.58917	0
LOC9271324	0.36	0.48	0.4	0.43	0.66	0.32	0.29	0.3	0.33	1.58	2.08	1.67	0.413	0.47	0.307	1.777	0.19106	0.45331	-0.60908	0.02412	1.92253	0
LOC4327992	0	0	0	0	0.02	0	0	0.02	0	0	0	0	0	0.007	0.007	0	NA	NA	-0.0154	0.99773	NA	NA
LOC4324744	0	0	0.09	0.09	0.09	0	0	0	0	0.17	0.26	0	0.03	0.06	0	0.143	1.04484	0.5885	NA	NA	1.30209	0.31146
LOC4330523	145.91	136.92	144.83	240.9	338.95	293.05	349.8	306.54	249.85	250.11	239.69	216.94	142.553	290.967	302.063	235.58	1.04398	0	0.04796	0.00023	-0.31248	0
LOC4352248	0	0.02	0.1	0	0	0	0	0	0	0	0	0	0.04	0	0	0	-3.54013	0.03045	NA	NA	NA	NA
LOC107275629	0.32	0.16	0.16	0	0	0.15	0.3	0.32	0.16	0	0	0	0.213	0.05	0.26	0	-1.95516	0.20981	2.30653	0.13184	NA	NA
LOC107276350	0	0	0	0.02	0	0	0	0	0	0	0	0	0	0.007	0	0	NA	NA	NA	NA	NA	NA
LOC4327217	12.85	9.23	14.27	3.65	1.39	3.64	4.33	4.84	4.91	5.1	3.38	5.11	12.117	2.893	4.693	4.53	-2.02371	0	0.67232	2e-05	0.61897	7e-05
LOC4351637	43.18	41.72	41.24	37.79	30.12	30.2	26.59	33.61	35.81	32.04	38.43	32.5	42.047	32.703	32.003	34.323	-0.34607	0	-0.03971	0.28726	0.0579	0.09368
LOC9269785	0	0.03	0.05	0	0.08	0.05	0.1	0.13	0	0.1	0.05	0.05	0.027	0.043	0.077	0.067	0.7818	0.49892	0.8326	0.36592	0.65823	0.4795
LOC4326110	0.74	0.89	1.09	0.99	0.87	0.71	0.91	0.68	0.74	0.87	1.37	0.99	0.907	0.857	0.777	1.077	-0.06077	0.81572	-0.14925	0.60339	0.32024	0.17914
LOC4331492	16.86	17.62	19.39	13.48	18.68	17.11	22.92	17.57	15.74	17.01	14.5	15.26	17.957	16.423	18.743	15.59	-0.11111	0.08202	0.18366	0.004	-0.08451	0.22067
LOC4345971	0.91	1.09	0.84	0.96	0.82	0.78	0.85	0.86	0.55	2.01	1.48	1.81	0.947	0.853	0.753	1.767	-0.11743	0.73639	-0.19826	0.61933	1.03079	0.00017
LOC112939858	0.06	0.06	0	0.48	0.6	0.81	0.59	0.62	0.61	0.81	0.82	0.45	0.04	0.63	0.607	0.693	3.90282	0	-0.06602	0.85172	0.12218	0.69215
LOC107276757	6.44	6.4	6.35	6.06	6.1	7.95	8.43	5.52	6.78	4.55	4.54	4.13	6.397	6.703	6.91	4.407	0.10095	0.39382	0.02721	0.84307	-0.62659	0
LOC4334422	3.19	3.04	2.43	5.77	8.9	6.33	3.74	3.33	2.93	6.29	5.76	5.95	2.887	7	3.333	6	1.28972	0	-1.07125	0	-0.2291	0.0064
LOC4332456	8.06	4.03	2.29	82.82	101.71	63.01	18.63	39.03	22.74	1184.33	1525.38	1464.73	4.793	82.513	26.8	1391.48	4.13396	0	-1.63488	0	4.0615	0
LOC4336109	0.63	0.41	1.34	0.71	0.64	0.99	2.65	5.66	3.01	0.93	2	1.54	0.793	0.78	3.773	1.49	0.04484	0.93446	2.22856	0	0.88286	0.02316
LOC9269046	14.66	15.85	14.24	6.17	10.03	8.33	22.17	15.94	14.96	6.57	5.01	5.39	14.917	8.177	17.69	5.657	-0.85563	0	1.10956	0	-0.53687	0
LOC107278701	0.62	0.45	0.5	0.14	0.15	0.31	0.14	0.11	0.08	0.09	0.17	0.03	0.523	0.2	0.11	0.097	-1.3702	0.00014	-0.82275	0.15407	-1.09023	0.05958
LOC4347183	7.59	6.55	6.1	6.88	7.01	6.75	6.93	6.71	7.7	4.21	4.57	3.84	6.747	6.88	7.113	4.207	0.03838	0.5824	0.04409	0.55149	-0.71655	0
LOC4338524	16.39	15.97	15.51	11.66	12.44	12.83	13.5	11.64	12.9	8.44	9.09	9.52	15.957	12.31	12.68	9.017	-0.36791	0	0.03968	0.59244	-0.45724	0
LOC4334271	13.52	12.12	12.97	13.41	11.98	14.58	11.61	15.32	13.66	9.95	9.23	9.56	12.87	13.323	13.53	9.58	0.06354	0.22559	0.01498	0.80746	-0.48473	0
LOC4328664	4.27	3.15	2.43	6.54	8.93	8.15	3.04	5.23	3.8	19.7	18.23	21.34	3.283	7.873	4.023	19.757	1.31664	0	-1.00451	0	1.35643	0
LOC4338842	0.52	0.66	0.85	0.13	0.44	0.53	0.71	0.29	0.33	0.24	0.72	0.32	0.677	0.367	0.443	0.427	-0.79647	0.03623	0.20699	0.67562	0.20255	0.6675
LOC4331747	97.28	100.4	99.46	85.22	87.37	83.61	97.26	86.69	90.01	64.47	65.38	63.12	99.047	85.4	91.32	64.323	-0.19436	0	0.08734	0.00049	-0.42068	0
LOC9271279	8.38	7.83	9.03	8.11	11.05	11.1	10.72	9.02	9.73	15.14	14.99	12.73	8.413	10.087	9.823	14.287	0.26918	4e-05	-0.04028	0.59087	0.49551	0
LOC4347532	32.31	33.1	33.46	41.06	42.02	38.11	32.29	36.46	34.68	42.76	42.55	40.58	32.957	40.397	34.477	41.963	0.32355	0	-0.24046	0	0.04111	0.19828
LOC4348212	4.41	3.94	4.11	6.21	6.73	5.27	3.83	4.49	4.22	6.4	6.92	6.66	4.153	6.07	4.18	6.66	0.54903	0	-0.53665	0	0.12989	0.03434
LOC4346262	1.71	2.19	2.37	3.23	1.73	1.97	4.39	5.37	4.78	0.96	0.17	0.92	2.09	2.31	4.847	0.683	0.16434	0.26207	1.05528	0	-1.77096	0
LOC4325250	3.93	4.1	4.04	4.08	9.11	6.04	5.47	6.88	5.45	9.85	8.28	8.3	4.023	6.41	5.933	8.81	0.67949	0	-0.11169	0.23518	0.45745	0
LOC4333813	3.54	3.86	3.73	3.69	3.79	3.4	3.92	3.52	3.69	2.26	2.58	1.97	3.71	3.627	3.71	2.27	-0.01244	0.93091	0.0245	0.86977	-0.68806	0
LOC4330073	12.94	14.63	20.73	13.3	19.52	13.55	16.6	18.61	15.19	19.04	17.88	12.7	16.1	15.457	16.8	16.54	-0.00063	0.99155	0.09718	0.11117	0.12322	0.03443
LOC9271297	1.66	1.64	0.79	1.96	3.35	2.15	3.17	1.81	2.12	1.19	1.21	1.12	1.363	2.487	2.367	1.173	0.898	0.0001	-0.08129	0.73946	-1.09927	1e-05
LOC107275492	0	0	0	0	0	0	0.16	0.08	0	0	0	0	0	0	0.08	0	NA	NA	NA	NA	NA	NA
LOC4338595	16.67	18.79	18.58	26.07	24.46	20.87	16.57	18.29	19.31	18.76	17.39	20.64	18.013	23.8	18.057	18.93	0.41774	0	-0.3883	0	-0.30143	0
LOC4332002	4.04	4.77	4.87	3.09	2.31	2.57	2.78	3.73	3.53	2.14	1.61	1.39	4.56	2.657	3.347	1.713	-0.73783	0	0.30099	0.02043	-0.65543	1e-05
LOC4335594	0.04	0	0	0	0	0	0.04	0	0	0	0	0	0.013	0	0.013	0	NA	NA	NA	NA	NA	NA
LOC4327599	65.03	68.67	69.28	57.11	55.99	51.97	57.53	72.96	70.03	45.45	46.34	44.38	67.66	55.023	66.84	45.39	-0.28419	0	0.27421	0	-0.28637	0
LOC4337505	56.11	56.86	57.07	41.33	38.37	33.44	42.72	43.95	43.01	32.18	32.31	29.92	56.68	37.713	43.227	31.47	-0.5773	0	0.19141	0	-0.26793	0
LOC4351961	3.49	3.36	2.92	4.36	3.97	2.92	2.82	4.13	3.84	5.05	5.76	5.34	3.257	3.75	3.597	5.383	0.214	0.00936	-0.05847	0.52708	0.51719	0
LOC4328447	0.42	0.36	0.1	0.16	0.32	0.26	0.33	0.16	0.05	0.31	0.57	0.1	0.293	0.247	0.18	0.327	-0.23527	0.68954	-0.50082	0.47874	0.42073	0.46721
LOC107277503	0.95	0.75	0.76	0.5	1.03	0.83	1.18	1.15	1.09	0.78	1.1	0.64	0.82	0.787	1.14	0.84	-0.05887	0.74364	0.53633	0.00053	0.10046	0.58561
LOC4346486	0.53	0.48	0.57	0.9	0.81	0.51	0.62	0.63	0.73	1.07	1.27	1.23	0.527	0.74	0.66	1.19	0.50167	0.00938	-0.16721	0.41672	0.68444	1e-05
LOC4323937	14.43	14.65	13.24	17.58	22.68	18.42	20.62	19.23	20.69	23.35	21.8	22.06	14.107	19.56	20.18	22.403	0.48162	0	0.04116	0.41106	0.19641	0
LOC107276804	0.03	0.03	0.06	0.06	0	0.06	0.03	0.09	0.03	0	0	0	0.04	0.04	0.05	0	0.04484	0.97632	0.30653	0.80346	NA	NA
LOC4332708	5.24	4.67	6.29	8.64	6.92	7.65	4.94	7.88	6.44	9.06	11.31	10.68	5.4	7.737	6.42	10.35	0.51789	0	-0.2682	0	0.40839	0
LOC4341426	0.36	0.36	0.07	7.14	0.15	4.6	0.26	0.29	0.18	4	5.16	2.59	0.263	3.963	0.243	3.917	3.95173	0	-4.05979	0	-0.05077	0.70402
LOC4331959	23.62	25.64	22.51	31.71	28.46	32.54	22.84	26.72	23.6	27	27.15	28.96	23.923	30.903	24.387	27.703	0.38557	0	-0.35032	0	-0.16786	1e-05
LOC4351825	0.99	0.92	1.65	0.49	0.32	0.55	0.62	0.31	0.49	0.12	0.13	0.06	1.187	0.453	0.473	0.103	-1.35371	0.00012	0.04873	0.93852	-2.15734	0.00112
LOC4327038	0.48	0.42	0.56	0.24	0.11	0.23	0.2	0.43	0.16	0.18	0.12	0.28	0.487	0.193	0.263	0.193	-1.33763	2e-05	0.46265	0.25599	0.03079	0.95583
LOC4348450	20.67	21.54	17.37	25.58	17.82	18.17	13.79	17.89	18.53	18.39	21.53	20.66	19.86	20.523	16.737	20.193	0.0562	0.01723	-0.29834	0	-0.02967	0.23345
LOC4337882	29.44	29.79	28.28	44.16	45.02	49.44	38.72	40.11	37.56	36	38.79	40.81	29.17	46.207	38.797	38.533	0.68601	0	-0.26419	0	-0.27565	0
LOC4344302	0.77	0.7	0.89	1.91	1.99	2.28	2.95	2.34	1.35	0.39	0.52	0.19	0.787	2.06	2.213	0.367	1.42035	0	0.08614	0.73683	-2.51734	0
LOC4331503	54.36	52.04	54.35	43.17	35.3	34.53	38.34	40.62	42.76	40.78	41.02	41.93	53.583	37.667	40.573	41.243	-0.49793	0	0.1014	3e-05	0.12373	0
LOC4340855	4.3	1.81	2.55	2.74	1.04	1.18	1.22	0.65	0.73	1.62	1.79	2.67	2.887	1.653	0.867	2.027	-0.75408	0.00097	-0.95171	0.00274	0.26376	0.32999
LOC4342837	14.26	13.01	13.4	13.57	16.35	15.66	14.05	14.99	15.94	16.03	14.9	16.13	13.557	15.193	14.993	15.687	0.18302	0.00273	-0.0268	0.70781	0.03806	0.56412
LOC4340720	39.05	37.19	39.54	34.9	39.44	41.03	46.58	45.2	46.59	36.72	30.51	33.09	38.593	38.457	46.123	33.44	0.01899	0.605	0.25309	0	-0.2348	0
LOC4343957	76.92	79.01	80.41	86.83	100.98	100.6	101.41	91.77	90.12	106.11	81.71	89.83	78.78	96.137	94.433	92.55	0.33251	0	-0.044	0.12646	-0.08947	0.00099
LOC4343201	0.12	0.12	0.33	0.83	0.62	1.46	2.89	4.15	3.93	0.51	0.49	0.48	0.19	0.97	3.657	0.493	2.38187	0	1.90347	0	-0.99009	0
LOC107281224	2.76	3.68	4.03	3.24	2.88	3.06	3.78	4.56	3.89	3.91	3.27	3.32	3.49	3.06	4.077	3.5	-0.16967	0.1953	0.40239	0.00126	0.18036	0.17861
LOC4331568	0.3	0.18	0.51	0.18	0.53	0.67	0.21	0.26	0.18	0.99	0.6	0.51	0.33	0.46	0.217	0.7	0.58249	0.10226	-1.25932	0.00174	0.4425	0.15055
LOC4344006	152.7	159	171.35	109.4	106.19	110.87	106.65	109.82	105.79	69.26	60.22	66.07	161.017	108.82	107.42	65.183	-0.61039	0	-0.02388	0.37132	-0.7199	0
LOC4351245	38.37	38.99	39.48	32.4	30.95	25.05	24	27.9	27.76	25.81	25.08	25.64	38.947	29.467	26.553	25.51	-0.39613	0	-0.15414	0	-0.2128	0
LOC4349313	6.63	5.16	5.18	10.86	13.04	11.91	11.77	10.42	9.06	12.36	12.51	12.77	5.657	11.937	10.417	12.547	0.58375	0	-0.26595	0	0.05436	0.30427
LOC112939656	0.04	0	0	0	0	0	0	0	0	0	0	0	0.013	0	0	0	NA	NA	NA	NA	NA	NA
LOC4327784	19.58	18.95	19.93	10.65	13.08	14.97	22.13	17.85	19.52	7.73	6.48	7.82	19.487	12.9	19.833	7.343	-0.5661	0	0.60707	0	-0.82867	0
LOC4336990	5.31	6.72	6.36	7	8.82	8.3	11.03	10.23	8.42	2.57	1.55	1.76	6.13	8.04	9.893	1.96	0.42372	0.00019	0.28439	0.00672	-2.05693	0
LOC4324725	26.08	27.61	24.07	24.26	30.4	25.95	24.71	20.94	19.85	15.36	9.99	11.16	25.92	26.87	21.833	12.17	0.0903	0.17717	-0.31577	0	-1.16367	0
LOC4328847	0	0.01	0	0	0	0	0.03	0	0.03	0	0	0	0.003	0	0.02	0	NA	NA	NA	NA	NA	NA
LOC4333633	6.25	6.22	5.59	9.04	10.75	9.81	9.36	9.31	9.19	7.58	8.21	7.14	6.02	9.867	9.287	7.643	0.73142	0	-0.09537	0.25048	-0.37938	0
LOC4341624	0	0	0	0	0	0	0	0	0	0	0	0.03	0	0	0	0.01	NA	NA	NA	NA	NA	NA
LOC4334747	7.65	8.14	7.83	7.74	14	9.02	9.99	6.98	6.69	14.51	14.46	13.14	7.873	10.253	7.887	14.037	0.39836	0	-0.38251	1e-05	0.44517	0
LOC4330447	4.6	5.88	4.89	7.06	7.32	8.3	5.78	5.93	3.63	4.9	5.57	4.61	5.123	7.56	5.113	5.027	0.57817	0	-0.57431	0	-0.59897	0
LOC9269363	20.48	19.35	18.55	22.7	32.05	22.49	21.67	24.55	23.09	25.24	27.23	25.5	19.46	25.747	23.103	25.99	0.42869	0	-0.16584	0.0052	0.00014	0.99803
LOC107280961	0	0.02	0.02	0.05	0.17	0.08	0.07	0.07	0.02	0.07	0.12	0.05	0.013	0.1	0.053	0.08	2.88336	0.00052	-0.98	0.13185	-0.32808	0.5878
LOC4346651	20.35	21.37	22.43	22.78	17.29	18.56	22.36	25.22	26.05	19.96	22.38	23	21.383	19.543	24.543	21.78	-0.11004	0.02158	0.31829	0	0.14385	0.00267
LOC107277611	0.31	0.34	0.16	0.34	1.01	0.73	0.7	0.23	0.45	1.04	0.71	0.75	0.27	0.693	0.46	0.833	1.36237	1e-05	-0.59035	0.03775	0.26103	0.29727
LOC4349985	23.02	22.14	22.3	23.45	24.3	23.54	44.74	32.78	38.06	31.11	33.1	33.55	22.487	23.763	38.527	32.587	0.15019	0.10681	0.66616	0	0.4135	0
LOC4344479	19.46	19.89	19	18.16	20.45	21.19	23.77	27.75	23.43	21.26	19.88	20.3	19.45	19.933	24.983	20.48	0.05161	0.31065	0.31819	0	0.0296	0.58319
LOC4346975	4.18	3.5	3.15	4.68	9.73	7.78	9.93	5.75	6.44	1.15	1.16	0.83	3.61	7.397	7.373	1.047	1.05357	0	-0.0096	0.94393	-2.82719	0
LOC4329912	0.03	0	0	0	0	0	0	0	0	0	0	0	0.01	0	0	0	NA	NA	NA	NA	NA	NA
LOC4341004	11.78	10.08	9.42	4.73	11.42	8.05	9.19	6.98	7.73	13.45	12.07	14.44	10.427	8.067	7.967	13.32	-0.35921	1e-05	-0.02315	0.83614	0.71816	0
LOC4331897	0.98	1.13	0.78	3.17	5.46	3.48	0.93	1.11	0.7	8.07	8.91	8.12	0.963	4.037	0.913	8.367	2.11523	0	-2.1347	0	1.02894	0
LOC4334907	41.76	40.63	40.87	71.74	128.25	99.59	40.13	30.98	27.26	29.82	17.1	19.53	41.087	99.86	32.79	22.15	1.30262	0	-1.61403	0	-2.18262	0
LOC107277027	0.41	0.5	0.5	0.6	0.95	0.66	1.02	0.87	0.91	1.12	0.62	0.76	0.47	0.737	0.933	0.833	0.66375	0.07138	0.3397	0.3165	0.16861	0.63184
LOC4347374	21.56	24.31	21.63	28.32	44.23	41.1	53.8	34.87	31.52	30.84	25.02	24.09	22.5	37.883	40.063	26.65	0.78674	0	0.06658	0.23833	-0.52735	0
LOC4328041	22.69	21.36	20.72	15.6	19.13	17.6	24.46	20.57	25.09	16.75	18.58	15.93	21.59	17.443	23.373	17.087	-0.29761	0	0.41878	0	-0.03545	0.45655
LOC4347326	33.5	34.32	34.49	96.65	75.07	73.44	38.81	49.83	45.63	74.83	90.26	86.83	34.103	81.72	44.757	83.973	1.30046	0	-0.8894	0	0.01448	0.71833
LOC107278750	0.11	0.05	0.11	0.31	0.24	0.27	0.25	0.35	0.31	0.08	0.07	0.12	0.09	0.273	0.303	0.09	1.62233	0.0002	0.15044	0.6973	-1.63615	0.00023
LOC107281725	0	0	0	0	0	0.05	0.03	0.03	0	0	0.03	0	0	0.017	0.02	0.01	NA	NA	-0.0154	0.99952	-1.01984	0.61245
LOC4342686	0	0.01	0	0	0	0	0	0	0	0	0	0	0.003	0	0	0	NA	NA	NA	NA	NA	NA
LOC107279592	1.04	0.88	0.67	0.93	5.94	2.66	3.42	5.65	4.31	3.77	3.79	3.74	0.863	3.177	4.46	3.767	1.8755	0	0.49851	0	0.25236	0.02558
LOC4328544	0.03	0.03	0	0.09	0.03	0.06	0.03	0.09	0.03	0	0	0.06	0.02	0.06	0.05	0.02	1.6298	0.16728	-0.27843	0.80277	-1.6048	0.18412
LOC107279287	0	0.12	0.06	0.12	0.12	0.59	0.06	0.18	0.3	0.06	0.18	0.06	0.06	0.277	0.18	0.1	2.26723	0.00684	-0.65283	0.35844	-1.50527	0.04748
LOC4331227	0	0.04	0.15	0.15	0.16	0.15	0.35	0.35	0.23	0.58	1.14	0.5	0.063	0.153	0.31	0.74	1.30787	0.09445	0.9846	0.07228	2.27784	0
LOC4330708	20.34	18.27	22.92	20.82	18.49	18.11	18.09	19	17.95	18.5	20.11	18.46	20.51	19.14	18.347	19.023	-0.08383	0.06695	-0.06956	0.16655	-0.01917	0.71354
LOC4339368	18.07	17.59	19.29	13.39	11.67	10.98	13.36	13.53	12.97	10.93	10.93	10.12	18.317	12.013	13.287	10.66	-0.59082	0	0.1359	0.02842	-0.18357	0.0038
LOC4326203	39.88	38.06	37.57	25.8	33.73	33.04	35.53	30.9	31.35	44.8	47	44.28	38.503	30.857	32.593	45.36	-0.2737	0	0.05815	0.41397	0.52868	0
LOC4345539	18.2	18.37	16.07	21.7	18.84	21.3	18.77	20.96	19.56	20.82	23.48	23.55	17.547	20.613	19.763	22.617	0.25214	0	-0.07155	0.17534	0.11878	0.01331
LOC4340793	2.08	1.41	2	1.35	1.16	1.2	2.32	2.17	2.11	1.75	2.07	1.75	1.83	1.237	2.2	1.857	-0.54494	0	0.81045	0	0.56994	0
LOC4338650	0	0	0	0.14	0.11	0.11	0.11	0	0	0	0	0	0	0.12	0.037	0	4.36677	0.00211	-1.75236	0.06898	-4.34177	0.00254
LOC107281588	0.77	0.25	0	0.12	1.08	0.84	0.12	0	0	0.44	0.38	0.12	0.34	0.68	0.04	0.313	1.07517	0.09486	-4.04573	0.00016	-1.13944	0.08663
LOC4325241	2.98	2.58	2.99	2.43	2.56	2.68	3.85	3.6	3.93	1.98	1.93	2.45	2.85	2.557	3.793	2.12	-0.14869	0.15527	0.56605	0	-0.27238	0.01501
LOC4347626	45.67	45.17	40.84	36.96	42.34	49.05	51.46	47.66	43.47	39.73	33.85	36.25	43.893	42.783	47.53	36.61	-0.02364	0.48362	0.14934	0	-0.22827	0
LOC4343965	54.07	60.74	59.55	34.56	39.98	40.1	61.51	43.33	38.2	41.42	28.97	32.2	58.12	38.213	47.68	34.197	-0.56668	0	0.30211	0	-0.18238	0.00082
LOC4337365	12.42	12.06	11.69	15.25	17.59	16.75	14.58	15.35	15.57	17.32	18.89	17.44	12.057	16.53	15.167	17.883	0.43754	0	-0.14682	0.00023	0.10061	0.00872
LOC107278434	0.06	0.03	0.08	0.16	0.26	0.1	0.21	0.15	0.19	0.38	0.25	0.15	0.057	0.173	0.183	0.26	1.5396	0.00183	0.11787	0.79649	0.58055	0.10651
LOC4344234	43.75	43.23	45.82	46.95	50.46	50.4	62.5	52.51	49.46	56.75	52.62	54.96	44.267	49.27	54.823	54.777	0.18839	2e-05	0.1382	0.00124	0.1327	0.00172
BGIG39947_31991	0	0	0	0	0	0	0	0	0	0	0.03	0	0	0	0	0.01	NA	NA	NA	NA	NA	NA
LOC4327698	21.99	22.32	23.03	25.16	21.91	20.15	17.53	24.01	21.22	22.79	28.16	26.85	22.447	22.407	20.92	25.933	0.01219	0.78152	-0.10644	0.01196	0.20211	0
LOC112937915	0	0	0	0.07	0.07	0.06	0	0	0	0.07	0	0	0	0.067	0	0.023	NA	NA	NA	NA	-1.6048	0.35916
LOC4329456	2.29	3.11	3.6	4.92	4.17	6.15	8.03	5.97	6.42	1.6	0.94	1.17	3	5.08	6.807	1.237	0.81116	0	0.39567	0.00915	-2.0682	0
LOC4344265	113.49	98.58	104.21	77.2	98.96	90.2	134.21	104.95	118.61	67.76	59.24	54.8	105.427	88.787	119.257	60.6	-0.21733	0	0.40926	0	-0.56975	0
LOC107279909	0.28	0.46	0.47	0.54	1.24	0.85	0.84	0.7	0.73	0.81	1.24	0.59	0.403	0.877	0.757	0.88	1.0709	9e-05	-0.1763	0.51856	0.02384	0.93615
LOC4344995	6.73	6.02	6.12	7.92	8.73	8.22	6.88	8.32	7.16	9.2	9.42	9.6	6.29	8.29	7.453	9.407	0.43743	0	-0.15143	0.03843	0.16411	0.01475
LOC4330100	13.93	14.31	13.69	16.43	16.76	13.01	11.81	15.87	14.8	14.62	16.69	14.11	13.977	15.4	14.16	15.14	0.149	0.0001	-0.12302	0.00186	-0.02997	0.47325
LOC4347521	33.84	34.21	32.82	46.5	43.52	41.62	53.38	42.28	37.05	28.36	20.94	19.96	33.623	43.88	44.237	23.087	0.39675	0	-0.00532	0.93368	-0.94301	0
LOC4351476	1.01	1.23	0.73	1.52	2.15	2.03	1.7	0.98	1.01	1.66	1.55	1.25	0.99	1.9	1.23	1.487	0.9659	0	-0.63512	0.0019	-0.36931	0.06175
LOC4347093	97.69	90.98	82.71	47.47	84.07	76.64	59.35	71	61.24	94.47	78.04	126.58	90.46	69.393	63.863	99.697	-0.37882	0	-0.11885	0	0.52447	0
LOC4337698	0	0	0	0	0	0	0.03	0.07	0	0	0	0.03	0	0	0.033	0.01	NA	NA	NA	NA	NA	NA
LOC4327592	19.25	18.98	18.93	16.76	18.01	16.79	16.44	16.46	17.92	15.4	17.65	17.26	19.053	17.187	16.94	16.77	-0.13014	0.01573	-0.02903	0.65511	-0.04624	0.44602
LOC4323868	12.39	14.26	13.12	16.22	21.4	22.85	24.72	19.8	20	14.96	11.67	12.43	13.257	20.157	21.507	13.02	0.62422	0	0.08451	0.13999	-0.64161	0
LOC4350138	34.73	33.29	27.66	44.11	50.63	43.76	11.82	15.24	11.38	36.14	31.31	36.13	31.893	46.167	12.813	34.527	0.54194	0	-1.85364	0	-0.42155	0
LOC4334593	0	0.08	0.08	6.96	0.58	1.81	0.16	0.49	0.24	4.13	5.51	4.5	0.053	3.117	0.297	4.713	5.9152	0	-3.42633	0	0.55274	0.00212
LOC4347736	120.92	116.1	114.86	101.33	107.04	100.65	156.09	121.03	129.85	98.17	82.35	76.65	117.293	103.007	135.657	85.723	-0.16086	0	0.38501	0	-0.28092	0
LOC4339511	0.49	0.44	0.35	1.17	0.94	1.9	0.66	0.76	0.74	1.13	1.23	0.91	0.427	1.337	0.72	1.09	1.66481	0	-0.89234	0	-0.30277	0.0239
LOC4332571	0.29	0.05	0.05	0.05	0.05	0	0.05	0	0	0.1	0.24	0.05	0.13	0.033	0.017	0.13	-1.95516	0.07135	-1.0154	0.62983	1.98016	0.07288
LOC4329622	10.8	10.84	10.53	13.51	11.18	11.82	9.07	11.26	11.12	12.74	14.15	12.4	10.723	12.17	10.483	13.097	0.19196	7e-05	-0.22118	1e-05	0.09514	0.04817
LOC4345738	4.12	3.59	3.9	19.26	34.32	27.84	6.77	8.91	6.6	15.62	19.54	15.44	3.87	27.14	7.427	16.867	2.83982	0	-1.88273	0	-0.70357	0
LOC4338077	437.55	411.51	427.01	318.95	291.3	289.97	461.59	351.98	418.03	226.93	202.7	176.43	425.357	300.073	410.533	202.02	-0.46527	0	0.4344	0	-0.5943	0
LOC4329165	3.44	4.48	3.98	5.08	7.4	6.34	4.22	4.56	4.97	8.09	8.33	6.41	3.967	6.273	4.583	7.61	0.68576	0	-0.46214	0.00014	0.26395	0.01435
LOC4343867	39.78	34.81	38.37	29.21	33.91	32.26	47.56	36.26	37.78	30.71	27.27	28.41	37.653	31.793	40.533	28.797	-0.22399	0	0.34129	0	-0.15421	0.00044
LOC9270148	5.15	5.04	5.59	3.89	6.97	7.9	7.33	5.99	7.51	4.79	4.79	4.51	5.26	6.253	6.943	4.697	0.1433	0.28204	0.07677	0.59451	-0.23557	0.08174
LOC4323951	20.3	21.84	19.24	26.46	22.51	22.09	17.04	20.54	20.74	22.87	25.76	24.98	20.46	23.687	19.44	24.537	0.22735	0	-0.29339	0	0.04035	0.35931
LOC4328767	2.18	2.32	2.11	3.92	11.87	9.16	4.53	3.49	2.79	13.7	9.61	12.31	2.203	8.317	3.603	11.873	1.93623	0	-1.21229	0	0.50656	0
LOC4324332	9.6	9.86	8.5	15.22	13.73	12.32	11.26	13.71	12.17	16.14	18.86	16.85	9.32	13.757	12.38	17.283	0.57684	0	-0.15969	0.00416	0.31946	0
LOC9269036	1.37	0.91	1.08	1.35	1.96	2.28	1.26	1.56	1.37	0.91	0.55	0.81	1.12	1.863	1.397	0.757	0.78398	0.01129	-0.44044	0.16295	-1.32458	9e-05
LOC4343499	0.11	0.34	0.19	0.21	0.19	0.54	1.58	2.61	1.67	0.95	1.11	1.19	0.213	0.313	1.953	1.083	0.55385	0.15993	2.67312	0	1.8151	0
LOC4329031	0.63	0.61	0.3	0.17	0.21	0.35	0.5	0.73	1.03	3.22	2.94	3.09	0.513	0.243	0.753	3.083	-1.07446	0.00091	1.63442	0	3.65746	0
LOC107278696	0.04	0	0	0.26	0.36	0.09	0	0	0	0.22	0.09	0.04	0.013	0.237	0	0.117	4.04484	0.00012	-5.0154	9e-05	-1.01984	0.12349
LOC4329585	0	0	0	0.54	0	0.14	0.03	0.07	0.07	0	0	0	0	0.227	0.057	0	5.36677	1e-05	-2.0154	0.00352	-5.34177	1e-05
LOC4325579	24.88	23.01	25.24	17.85	17.31	19.27	21.47	18.6	19.97	18.03	17.6	15.54	24.377	18.143	20.013	17.057	-0.39713	0	0.12716	0.05583	-0.1073	0.11715
LOC4324683	79.39	85.18	60.72	319.21	356.33	237.07	60.39	76	73.94	238.8	240.55	235.12	75.097	304.203	70.11	238.157	2.03355	0	-2.12335	0	-0.36151	0
LOC4346848	18.62	17.53	17.37	17.77	21	21.92	18.82	19.75	18.39	20.97	19.55	18.25	17.84	20.23	18.987	19.59	0.19337	1e-05	-0.09676	0.03104	-0.05323	0.23954
LOC4327617	0	0	0	0	0	0	0	0	0	0	0	0.34	0	0	0	0.113	NA	NA	NA	NA	NA	NA
LOC4324073	0.04	0	0	0.04	0	0	0	0	0	0	0.04	0.04	0.013	0.013	0	0.027	0.04484	0.98677	NA	NA	0.98016	0.6253
LOC107279560	0.07	0.04	0.15	0.07	0.27	0	0.07	0.07	0	0.17	0.07	0	0.087	0.113	0.047	0.08	0.43247	0.5962	-1.26952	0.18431	-0.47151	0.58243
LOC9271664	0.2	0.18	0.12	0.24	0.28	0.26	0.28	0.4	0.3	0.37	0.16	0.3	0.167	0.26	0.327	0.277	0.66556	0.16407	0.32081	0.47429	0.03273	0.95432
LOC4333716	56.56	60.86	58.45	49.75	41.7	50.27	44.64	54.25	56.03	49.33	53.36	51.55	58.623	47.24	51.64	51.413	-0.28082	0	0.111	0.00419	0.09942	0.00973
LOC4351210	0.17	0.17	0.19	0.43	0.3	0.48	0.05	0.29	0.29	0.89	0.58	0.76	0.177	0.403	0.21	0.743	1.22926	0.00083	-0.95881	0.00882	0.87546	0.00073
LOC4348352	36.78	35.77	35.5	38.45	44.34	36.63	40.81	39.84	41.87	43.12	47.16	42.95	36.017	39.807	40.84	44.41	0.01854	0.51067	0.00498	0.88243	0.20272	0
LOC4344867	0	0	0	0	0.04	0	0	0	0	0	0	0	0	0.013	0	0	NA	NA	NA	NA	NA	NA
LOC4348299	119.78	112.9	97.93	48.88	65.78	67.99	50.26	63.25	56.76	135.82	130.3	173.19	110.203	60.883	56.757	146.437	-0.84186	0	-0.10678	0.00013	1.25982	0
LOC4341361	17.75	16.23	14.55	24.19	22.45	20.54	16.19	23.62	19.11	45.62	51.43	48.73	16.177	22.393	19.64	48.593	0.50908	0	-0.19853	0.0001	1.10617	0
LOC9270274	0.22	0.15	0	0.14	0.98	0	0.07	0	0.15	0.37	0.07	0.07	0.123	0.373	0.073	0.17	1.6298	0.02573	-2.33733	0.00573	-1.11937	0.10687
LOC4341393	12.91	13.25	12.84	12.04	16.5	15.35	18.31	18.44	16.71	16.7	14.68	14.93	13	14.63	17.82	15.437	0.18081	0.00028	0.28096	0	0.07256	0.15203
LOC107281389	0.21	0.02	0	0.02	0	0.02	0	0.09	0.03	0	0.08	0	0.077	0.013	0.04	0.027	-1.95516	0.07135	1.79196	0.1298	1.15648	0.38453
LOC4333593	3.05	3.57	2.78	7.73	11.8	8.82	6.13	7.51	6.67	9.35	8.44	8.73	3.133	9.45	6.77	8.84	1.59956	0	-0.48304	0	-0.09833	0.11276
LOC4349303	8.12	7.26	7.38	7.08	6.44	6.26	6.4	7.42	8.16	5.65	6.89	6.5	7.587	6.593	7.327	6.347	-0.19169	0.00115	0.14724	0.01825	-0.06166	0.35868
LOC4333590	6.87	6.01	6.88	12.33	16.86	14.64	7.47	9.03	8.37	17.29	18.54	16.92	6.587	14.61	8.29	17.583	1.15071	0	-0.80837	0	0.27101	0
LOC107277541	1.03	3.28	1.76	9.69	6.6	8.74	3.33	4.6	3.8	8.9	10.03	7.25	2.023	8.343	3.91	8.727	2.11809	0	-1.13445	0	0.01544	0.93636
LOC9267354	0.4	0.23	0.33	0.1	0.05	0.08	0.05	0.08	0	0.13	0.05	0.03	0.32	0.077	0.043	0.07	-2.03317	3e-05	-0.86339	0.34664	-0.18976	0.82423
LOC4345772	8.26	6.41	6.33	10.17	12.98	12.99	13.65	12.73	12.93	17.28	17.89	14.97	7	12.047	13.103	16.713	0.80395	0	0.11228	0.13308	0.46006	0
LOC4324045	25.8	24.32	25.24	25.23	29.73	27.34	28.7	28.86	27.25	28.04	23.26	24.86	25.12	27.433	28.27	25.387	0.14903	0.00233	0.03329	0.547	-0.12403	0.01318
LOC107278670	0.02	0.02	0	0	0	0	0.02	0	0	0	0	0	0.013	0	0.007	0	NA	NA	NA	NA	NA	NA
LOC107275913	0	0	0	0	0	0.18	0.55	0.69	0.86	0	0	0	0	0.06	0.7	0	3.85219	0.01389	3.49918	0	-3.82719	0.01607
LOC107278857	0.42	0.45	0.24	0.59	1.24	0.63	0.32	0.46	0.32	0.92	0.43	0.49	0.37	0.82	0.367	0.613	1.15336	0.00018	-1.16973	0.00022	-0.42792	0.13792
LOC4341570	37.94	34.37	34.91	33.62	41.12	43.25	58.16	45.22	50.13	38.16	37.56	29.75	35.74	39.33	51.17	35.157	0.16665	0.00015	0.36367	0	-0.17211	0.00012
LOC4350423	8.54	7.67	7.71	3.87	3.96	4.63	7.44	6.78	6.81	5.64	5.14	5.87	7.973	4.153	7.01	5.55	-0.92391	0	0.74609	0	0.40802	2e-05
LOC9267608	54.98	51.03	54.49	50.36	55.39	62.56	71.83	68.84	67.62	61.44	55.91	58.25	53.5	56.103	69.43	58.533	0.10391	0.01225	0.29019	0	0.03997	0.36021
LOC4348023	16.62	14.98	15.29	21.62	19.7	17.52	14.15	16.54	17.73	21.07	21.65	21.14	15.63	19.613	16.14	21.287	0.31316	0	-0.27563	0	0.11976	0.0039
LOC4331405	4.1	3.17	2.96	11.63	15.76	13.63	4.44	6.42	5.51	11.58	10.07	9.3	3.41	13.673	5.457	10.317	2.02101	0	-1.33228	0	-0.41603	0
LOC4329023	3.5	2.99	3.74	5.23	5.53	4.16	2.19	2.37	3.5	4.99	6.47	5.64	3.41	4.973	2.687	5.7	0.54066	0	-0.89396	0	0.19377	0.00234
LOC4335397	6.02	4.46	4.78	4.99	6.17	5.67	5.89	5.52	5.82	6.96	6.71	6.94	5.087	5.61	5.743	6.87	0.15258	0.0746	0.02932	0.76693	0.28687	0.00025
LOC4324101	0.07	0.13	0	0.08	0.24	0.08	0.03	0.1	0.13	0.03	0.1	0.07	0.067	0.133	0.087	0.067	0.95173	0.15064	-0.60036	0.37868	-0.92673	0.17175
BGIG39947_31895	0	0.2	0	0	0	0	0	0.2	0	0	0	0	0.067	0	0.067	0	NA	NA	NA	NA	NA	NA
LOC4329368	2.44	1.64	1.58	2.7	4.6	4.21	1.87	2.5	3.33	6.71	6.57	6.7	1.887	3.837	2.567	6.66	1.02935	0	-0.58744	0	0.79344	0
LOC9266809	0	0	0.02	0	0.02	0	0	0.02	0.02	0.02	0.07	0.02	0.007	0.007	0.013	0.037	0.03062	0.98896	0.99173	0.63514	2.30779	0.11884
LOC107277612	0.3	0.59	0.3	0.27	0.5	0.27	0.12	0.3	0.15	0.18	0.09	0.12	0.397	0.347	0.19	0.13	-0.18963	0.6163	-0.85493	0.05517	-1.40686	0.00271
LOC4333714	7.99	8.23	8.81	13.46	14.5	15.5	13.15	14.54	15.5	16.18	16.23	13.27	8.343	14.487	14.397	15.227	0.82244	0	-0.02182	0.80226	0.05512	0.47383
LOC4330942	0.75	0.75	0.66	1.25	1.58	1.68	2.16	1.65	1.37	2.39	2.08	1.65	0.72	1.503	1.727	2.04	1.06814	0	0.19295	0.11158	0.43528	6e-05
LOC4329228	48.08	47.59	49.53	46.53	53.93	48.9	48.45	47.54	51.65	50.03	53.12	51.11	48.4	49.787	49.213	51.42	0.05355	0.06347	-0.02308	0.47609	0.03873	0.19136
LOC4339153	12.55	14.92	12.98	24.3	27.62	22.66	32.73	26.29	25.42	27.84	27.06	26.49	13.483	24.86	28.147	27.13	0.88956	0	0.17063	0.00123	0.11485	0.03242
LOC107276549	6.17	6.36	6.89	17.59	11.95	16.82	11.65	21.01	14.91	10.81	15.54	13.46	6.473	15.453	15.857	13.27	1.26879	0	0.02908	0.53435	-0.22931	0
LOC4334112	44.79	45.32	48.68	39.13	35.06	39.55	36.22	35.73	35.76	31.37	25.86	27.98	46.263	37.913	35.903	28.403	-0.23053	0	-0.11952	0.0044	-0.43847	0
LOC4330852	47.92	45.61	45.31	52.83	47.3	48.48	55.05	46.22	50.74	64.21	69.54	63.09	46.28	49.537	50.67	65.613	0.12789	0.00138	0.01809	0.69944	0.38683	0
LOC9271800	0.22	0.13	0.07	0.18	0.15	0.29	0.22	0.3	0.07	0.15	0.04	0.22	0.14	0.207	0.197	0.137	0.595	0.3176	-0.10919	0.86959	-0.64787	0.29407
LOC4352775	15.69	15.64	16.39	21.67	23.2	19.22	14.8	15.9	14.77	20.44	20.67	18.39	15.907	21.363	15.157	19.833	0.43508	0	-0.49912	0	-0.11318	0.0026
LOC107281522	0.02	0	0	0	0.02	0	0	0.02	0	0	0.05	0.05	0.007	0.007	0.007	0.033	0.04484	0.98677	-0.0154	0.99773	2.56512	0.06883
LOC4349945	0.08	0	0	0.07	0.03	0.03	0.03	0.03	0	0.05	0.05	0.07	0.027	0.043	0.02	0.057	0.05464	0.96856	-0.85819	0.52426	0.82199	0.38544
LOC4331463	16.32	17.69	16.61	18.56	18.77	16.65	16.39	18.5	19.24	14.12	17.45	13.77	16.873	17.993	18.043	15.113	0.12541	0.04597	0.00582	0.94763	-0.27506	1e-05
LOC4342159	418.73	411.53	424.05	236.21	209.54	258.85	287.39	299	307.16	222.93	209.24	216.8	418.103	234.867	297.85	216.323	-0.80345	0	0.32784	0	-0.1365	0
LOC4332525	0.91	0.62	0.81	0.81	1.1	1.34	1.55	1.41	1.3	1.84	1.32	1.15	0.78	1.083	1.42	1.437	0.49622	0.08389	0.37794	0.14947	0.38981	0.12405
LOC107279367	0.02	0.13	0.13	0	0	0.02	0.08	0.12	0.12	0.08	0.04	0.04	0.093	0.007	0.107	0.053	-3.80316	0.00046	3.9846	0.00022	2.98196	0.02132
LOC4342863	15.83	17.34	16.72	23.81	26.48	27.71	24.9	24.91	24.33	32.83	31.65	32.11	16.63	26	24.713	32.197	0.67591	0	-0.08814	0.15988	0.28973	0
LOC4328203	14.61	14.22	15.97	15.6	16.86	18.16	15.86	17.65	17.92	14.73	16.69	14.67	14.933	16.873	17.143	15.363	0.18766	0.00147	0.01405	0.84479	-0.16266	0.00682
LOC4330484	15.15	14.37	14.91	19.5	16.68	13.21	10.98	13.52	14.69	17.08	20.97	19.49	14.81	16.463	13.063	19.18	0.15983	0	-0.33896	0	0.21545	0
LOC4349436	5.45	6.2	4.73	16.53	11.83	13.11	4.68	8.7	7.77	10.92	11.35	15.41	5.46	13.823	7.05	12.56	1.37046	0	-0.97179	0	-0.14705	0.0086
LOC9271781	1.08	1.12	0.8	0.95	1.22	0.92	1.25	1.26	1.11	1.51	1.63	1.6	1	1.03	1.207	1.58	0.17783	0.10682	0.10947	0.3405	0.61247	0
LOC107276325	29.06	37.36	38.66	25.78	15.29	24.55	19.22	24.9	18.1	10.2	12.81	10.43	35.027	21.873	20.74	11.147	-0.7243	0	-0.07843	0.21922	-0.99565	0
LOC107276124	0.78	0.72	0.32	0.09	0.4	0.29	0.13	0.1	0.16	0.03	0	0.13	0.607	0.26	0.13	0.053	-1.22818	0.00039	-1.0154	0.06327	-2.28287	0.0004
LOC4327977	62.84	61	58.92	54.68	64.12	51.59	40.99	39.7	38.5	50.23	51.5	58.95	60.92	56.797	39.73	53.56	-0.09271	0.00035	-0.5214	0	-0.08776	0.00129
LOC4344225	11.94	13.77	1.54	10.51	17.74	16.99	4.31	11.43	8.75	20.71	11.5	14.82	9.083	15.08	8.163	15.677	0.75139	0	-0.89326	0	0.04641	0.51519
LOC4348090	0.15	0.22	0.15	0.32	0.41	0.44	0.3	0.32	0.36	0.54	0.54	0.45	0.173	0.39	0.327	0.51	1.15673	0	-0.26131	0.21238	0.38168	0.03023
LOC4325610	0.13	0	0	0	0.13	0	0.04	0.14	0.25	0.59	0.89	0.79	0.043	0.043	0.143	0.757	0.04484	0.97985	1.9846	0.0289	4.20255	0
LOC4328103	72.57	79.39	73.59	101.47	65.83	81.55	54.56	71.76	68.68	72.42	76.07	83.56	75.183	82.95	65	77.35	0.19368	0	-0.3738	0	-0.12766	0.00029
LOC9268037	11.52	11.15	8.71	8.07	12.7	9.64	9.21	5.96	5.98	5.25	4.09	3.92	10.46	10.137	7.05	4.42	-0.00188	0.98734	-0.53958	2e-05	-1.22095	0
LOC4336822	0.16	0.38	0.43	0.57	0.88	0.77	0.86	0.74	0.68	0.46	0.22	0.24	0.323	0.74	0.76	0.307	1.19684	3e-05	0.03771	0.90267	-1.25898	2e-05
LOC4332152	51.93	54.63	57.45	40.31	37.01	37.46	41.84	40.49	38.05	13.72	9.4	9.69	54.67	38.26	40.127	10.937	-0.50711	0	0.03652	0.32088	-1.76725	0
LOC4343396	6.88	6.63	4.87	11.58	8.52	8.66	9.8	10.27	11.71	8.08	6.23	7.75	6.127	9.587	10.593	7.353	0.68271	0	0.12356	0.13769	-0.41241	0
LOC9266246	0	0	0	0.06	0	0	0	0	0	0	0.06	0	0	0.02	0	0.02	NA	NA	NA	NA	-0.01984	0.99567
LOC4327751	0.13	0.08	0.13	0.18	0.32	0.28	0.18	0.13	0.08	0.15	0.23	0.08	0.113	0.26	0.13	0.153	1.25114	0.00924	-1.01348	0.03639	-0.75376	0.10139
LOC9267267	29.5	29.15	29.93	23.6	22.74	22.79	21.86	23.24	25.34	20.89	22.7	21.83	29.527	23.043	23.48	21.807	-0.31954	0	0.01994	0.5744	-0.10548	0.00078
LOC107276211	0	0	0	0	0	0	0.25	0.26	0.25	0.05	0.15	0.1	0	0	0.253	0.1	NA	NA	4.89149	0.00017	3.56512	0.03191
LOC4324820	5.48	6.04	6.65	10.29	14.58	14.42	7.48	8.91	6.71	6.14	5.46	6.27	6.057	13.097	7.7	5.957	1.12597	0	-0.77231	0	-1.14272	0
LOC4342515	48.54	46.88	49.56	50.43	39.88	43.56	37.69	47.68	46.19	37.22	38.58	37.85	48.327	44.623	43.853	37.883	-0.09927	0.00019	-0.03334	0.27324	-0.24661	0
LOC4331114	7.19	7.31	6.77	11.87	11.41	10.03	9.14	10.62	10.7	8.85	9.99	9.64	7.09	11.103	10.153	9.493	0.65734	0	-0.13325	0.01271	-0.23263	1e-05
LOC4345022	1.65	0.87	1.47	2.29	1.04	2.13	3.6	2.2	1.79	0.48	0.13	0.22	1.33	1.82	2.53	0.277	0.48706	0.01876	0.45345	0.01266	-2.7377	0
LOC4333462	66.69	68.36	63.86	57.3	44.74	44.29	52.54	58.29	65.12	41.1	43.72	38.79	66.303	48.777	58.65	41.203	-0.4248	0	0.25564	0	-0.25637	0
LOC4330940	7.89	7.57	7.44	12.28	15.8	12.81	9.42	10.16	9.65	14.01	14.21	15.91	7.633	13.63	9.743	14.71	0.76424	0	-0.46272	0	0.08471	0.03166
LOC9269633	8.07	7.49	7.61	10.21	5.27	6.39	6.68	12.24	11.17	4.27	6.4	6.37	7.723	7.29	10.03	5.68	-0.05435	0.57306	0.44308	0	-0.37978	9e-05
LOC4346365	2.53	3.04	3.15	3.39	5.14	3.64	2.85	4.37	3.77	6.43	7.88	7.33	2.907	4.057	3.663	7.213	0.49382	6e-05	-0.15164	0.23908	0.82302	0
LOC9266353	0.21	0.36	0	0.15	0.16	0.46	0.1	0.21	0.1	0.47	0.37	0.1	0.19	0.257	0.137	0.313	0.4923	0.4351	-0.92229	0.1872	0.2432	0.68207
LOC4349570	0	0	0	0.03	0.14	0.03	0	0	0	0.05	0.02	0.01	0	0.067	0	0.027	4.74528	0.00034	-4.71584	0.00049	-1.39835	0.07215
LOC4344664	50.87	52.91	53.13	59.6	62.47	58.87	73.65	64.16	67.09	62.66	75.25	77.7	52.303	60.313	68.3	71.87	0.2401	0	0.16655	0	0.2331	0
LOC4337380	22.43	20.06	20	29.7	30.36	34.1	24.55	31.53	29.67	40.46	49.49	45.41	20.83	31.387	28.583	45.12	0.62219	0	-0.14673	0.00163	0.51016	0
LOC4326989	13.64	13.93	12.3	14	12.1	16.42	15.19	12.66	13.83	11.66	12.71	11.64	13.29	14.173	13.893	12.003	0.13474	0.12776	-0.05022	0.61703	-0.26691	0.00288
LOC4330357	19.56	15.6	15.88	17.34	9.21	17.81	28.86	25.67	24.09	9.62	6.54	5.78	17.013	14.787	26.207	7.313	-0.14937	0.08813	0.79624	0	-1.05021	0
LOC4334856	1.99	2.41	3.34	1.28	1.54	1.65	1.38	0.91	0.94	1.22	1.15	1.09	2.58	1.49	1.077	1.153	-0.77161	1e-05	-0.47802	0.03556	-0.38059	0.08601
LOC4337539	102.8	103.54	98.87	104.28	94.88	109.1	122.99	112.15	130.56	147.18	153.01	143.3	101.737	102.753	121.9	147.83	0.04805	0.10534	0.22967	0	0.50355	0
LOC4349082	2.14	1.89	2.26	3	5.33	4.47	3.62	2.58	2.47	5.58	4.89	4.25	2.097	4.267	2.89	4.907	1.03239	0	-0.56212	0	0.21075	0.01536
LOC4333157	29.58	28.57	30.34	40.34	41.26	37.27	25.45	33.13	34.33	35.11	39.16	39.87	29.497	39.623	30.97	38.047	0.43839	0	-0.36073	0	-0.06582	0.0367
LOC4334938	16.3	14.7	15.06	13.8	16.08	13.45	15.96	13.59	16.01	14.96	16.17	14.13	15.353	14.443	15.187	15.087	-0.0718	0.22427	0.06611	0.29756	0.05352	0.38951
LOC107276436	0	0	0	0	0	0.07	0	0	0	0	0	0	0	0.023	0	0	NA	NA	NA	NA	NA	NA
LOC4326537	2.26	1.76	2.08	2.15	3.98	1.8	1.44	1.79	0.89	4.5	5.31	6.55	2.033	2.643	1.373	5.453	0.41162	0.07816	-0.95768	0.00018	1.03079	0
LOC4339610	15.57	15.13	15.1	20.07	18.5	15.66	13.81	16.14	16.21	16.89	20.07	19.47	15.267	18.077	15.387	18.81	0.24979	0	-0.23529	0	0.05329	0.05439
LOC4335770	2.32	2.41	1.68	1.65	3.18	2.09	2.24	2.07	1.62	1.46	1	1.19	2.137	2.307	1.977	1.217	0.12159	0.4619	-0.22415	0.19532	-0.92579	0
LOC4332904	29.55	27.9	28.28	33.05	41.05	33.14	38.1	35.79	33.29	35.11	34.41	30.65	28.577	35.747	35.727	33.39	0.33773	0	-0.00376	0.94847	-0.11373	0.00575
LOC4332584	4.54	4.75	4.13	8.05	3.79	4.89	2.92	2.95	2.18	7.84	4.97	5.93	4.473	5.577	2.683	6.247	0.3601	0.00873	-1.08099	0	0.13697	0.312
LOC9266287	0	0	0	0	0	0	0	0	0	0	0.06	0	0	0	0	0.02	NA	NA	NA	NA	NA	NA
LOC9268400	0	0	0.05	0	0	0	0.22	0.13	0.08	0.2	0.09	0.09	0.017	0	0.143	0.127	NA	NA	5.37692	1e-05	5.15009	3e-05
LOC4350768	1.61	1.24	1.11	1.77	1.81	1.72	1.13	2	1.55	2.78	3.4	3.41	1.32	1.767	1.56	3.197	0.43931	0.01577	-0.18949	0.32783	0.84673	0
LOC4330452	2.3	1.93	2.3	3.12	1.75	2.67	1.67	3.18	2.48	5.68	6.27	5.7	2.177	2.513	2.443	5.883	0.22405	0.01602	-0.04898	0.64278	1.21852	0
LOC4330250	2.25	3.35	0.73	2.12	2.33	2.61	1.07	2.43	1.61	3.48	2.99	3.16	2.11	2.353	1.703	3.21	0.17037	0.21974	-0.47483	0.00102	0.43959	0.00029
LOC4339212	12.15	12.26	12.86	16.35	16.66	16.83	12.51	13.79	12.57	15.34	14.5	13.59	12.423	16.613	12.957	14.477	0.43254	0	-0.36513	0	-0.20653	1e-05
LOC4331259	39.66	36.95	34.93	47.34	44.38	34.93	29.57	35.72	36.59	52.93	61.6	62.16	37.18	42.217	33.96	58.897	0.25601	0	-0.30898	0	0.44156	0
LOC4341492	25.47	25.46	26.27	23.73	23.83	20.62	22.87	24.64	29.42	24.06	25.15	24	25.733	22.727	25.643	24.403	-0.17021	0	0.17082	0	0.09712	0.0034
LOC4346668	0.75	0.54	0.82	0.34	0.75	0.38	0.17	0.21	0.34	0.38	0.1	0.41	0.703	0.49	0.24	0.297	-0.51704	0.08942	-1.0154	0.01208	-0.71172	0.06349
LOC4344178	17.87	16.19	17.16	13.07	13.15	12.62	18.45	15.16	16.7	15.24	15.54	15.09	17.073	12.947	16.77	15.29	-0.37826	0	0.36409	0	0.22505	0.00043
LOC9266041	3.64	4.08	3.91	4.75	5.88	6.02	5.44	5.59	4.04	4.35	3.75	3.97	3.877	5.55	5.023	4.023	0.52582	0	-0.14795	0.06234	-0.46776	0
LOC9272269	2.25	1.88	1.95	1.34	0.51	1.36	2.88	2.63	3.1	0.25	0.22	0.21	2.027	1.07	2.87	0.227	-0.89858	0	1.40828	0	-2.26085	0
LOC4324768	16.54	15.99	16.83	20.88	20.65	16.64	12.26	14.82	14.47	19.17	19.86	18.01	16.453	19.39	13.85	19.013	0.24765	0	-0.49012	0	-0.03519	0.4121
LOC4347606	0.1	0.12	0.22	0.48	0.35	0.32	0.22	0.55	0.22	0.38	0.36	0.52	0.147	0.383	0.33	0.42	1.4183	6e-05	-0.23358	0.48522	0.12455	0.68887
LOC4340530	54.99	54.05	52.36	58.39	75.36	65.48	43.4	42	37.31	28.95	22.47	24.77	53.8	66.41	40.903	25.397	0.34624	0	-0.71802	0	-1.41005	0
LOC4338108	1.07	0.6	0.99	0.2	0.48	0.33	0.27	0.81	0.33	0.13	0.14	0.13	0.887	0.337	0.47	0.133	-1.3702	0.00139	0.47003	0.40894	-1.34177	0.06073
LOC4331249	2.19	2.22	1.63	3.06	4.53	3.61	2.3	2.66	2.39	8.44	7.61	5.59	2.013	3.733	2.45	7.213	0.915	0	-0.61662	0.00011	0.93748	0
LOC4341646	3.93	4.18	3.94	9.28	7.71	6.38	4.23	5.21	5.49	5.89	7.28	7.4	4.017	7.79	4.977	6.857	0.95823	0	-0.66484	0	-0.20158	0
LOC4332066	0.21	0.27	0.11	0.45	0.56	0.27	0.35	0.43	0.32	0.57	0.49	0.48	0.197	0.427	0.367	0.513	1.13999	0.00234	-0.21243	0.56891	0.25846	0.42286
LOC4352021	0.29	0.13	0.47	0.4	0.45	0.43	0.81	0.54	1.02	2.16	3.75	1.87	0.297	0.427	0.79	2.593	0.51432	0.36931	0.94396	0.03393	2.65573	0
LOC4325554	14.74	14.41	15.16	9.1	12.03	9.49	12.21	12.54	11.33	11.08	10.54	10.28	14.77	10.207	12.027	10.633	-0.52533	0	0.23408	1e-05	0.05545	0.33267
LOC4350548	0.03	0.03	0.06	0.4	0.55	0.53	0.44	0.28	0.25	0.22	0.09	0.09	0.04	0.493	0.323	0.133	3.59943	0	-0.61579	0.09361	-1.87399	1e-05
LOC4348034	0	0	0	0.01	0.01	0	0	0	0	0.03	0	0.02	0	0.007	0	0.017	NA	NA	NA	NA	1.30209	0.31146
LOC4342960	16.58	18.41	18.6	21.32	19.03	20.67	18.79	18.33	19.08	17.5	16.62	17.35	17.863	20.34	18.733	17.157	0.21339	0.00078	-0.13261	0.04638	-0.26463	4e-05
LOC4326625	8.94	8.22	8.5	3.94	4.74	5.24	5.17	7.95	6.81	5.01	5.39	7.93	8.553	4.64	6.643	6.11	-0.86671	0	0.5112	0	0.39061	3e-05
LOC4346326	1.14	2.01	2.89	4.39	5.58	2.91	1.85	1.64	0.89	29.81	36.12	26.09	2.013	4.293	1.46	30.673	1.1289	0	-1.57339	0	2.81448	0
LOC4332382	2.58	2.41	2.36	9.25	8.53	11.19	2.44	2.16	1.79	12.25	11.51	11.21	2.45	9.657	2.13	11.657	2.00806	0	-2.19779	0	0.25309	0.00296
LOC4348874	0	0	0	0	0	0	0	0	0	0	0	0.02	0	0	0	0.007	NA	NA	NA	NA	NA	NA
LOC4343404	95.88	109.05	103.28	81.08	91.74	98.71	131.66	92.22	112.57	80.36	76.34	81.09	102.737	90.51	112.15	79.263	-0.1255	0.00155	0.28313	0	-0.22592	0
LOC4342674	13.01	12.85	13.91	15.53	13.25	12.45	11.88	13.59	13.43	14.9	15.25	15.11	13.257	13.743	12.967	15.087	0.04394	0.26228	-0.09738	0.01381	0.13702	0.00018
LOC4335313	1.07	0.76	1.14	2.34	3.45	2.68	2.3	2.08	2.31	3.14	3.62	2.78	0.99	2.823	2.23	3.18	1.51402	0	-0.3315	0.0058	0.18635	0.09337
LOC4324340	0.06	0	0.03	0.06	0.23	0.06	0.06	0.09	0.03	0.11	0.06	0.03	0.03	0.117	0.06	0.067	2.04484	0.01964	-1.0154	0.20268	-0.79745	0.29006
LOC4340283	20.06	20.69	18.58	15.78	17.29	15.73	20.52	18.87	19.88	19.38	21.03	19.62	19.777	16.267	19.757	20.01	-0.25856	0	0.26943	0	0.28702	0
LOC4331948	46.31	45.46	44.65	52.63	45.07	41.2	47.88	47.09	51.23	43.49	46.4	44.31	45.473	46.3	48.733	44.733	0.04894	0.18741	0.06166	0.10334	-0.0644	0.0869
LOC4324335	3.85	3.32	4.37	2.9	3.61	2.54	5.09	3.87	4.24	4.23	4.71	5.42	3.847	3.017	4.4	4.787	-0.31049	0.11061	0.53004	0.00505	0.64518	0.00035
LOC107276752	0.39	0.48	0.6	0.62	0.43	0.34	0.24	0.44	0.55	0.36	0.5	0.33	0.49	0.463	0.41	0.397	-0.07381	0.78778	-0.19048	0.52851	-0.24223	0.39878
LOC4331620	0.32	0.39	0.31	3.55	2.04	1.98	0.12	0.08	0.16	1.85	2.25	1.69	0.34	2.523	0.12	1.93	2.90282	0	-4.35881	0	-0.42779	0.00871
LOC9267082	16.42	15.67	15.47	24.31	23.08	21	17.01	22.33	20.57	26.39	26.57	27.08	15.853	22.797	19.97	26.68	0.57717	0	-0.20473	0	0.20512	0
LOC107276890	0	0	0	0	0	0	0	0	0	0.03	0	0	0	0	0	0.01	NA	NA	NA	NA	NA	NA
LOC4343162	15.24	15.16	15.09	17.84	14.06	14.64	11.97	15.35	15.79	16.54	19.83	17.27	15.163	15.513	14.37	17.88	0.01703	0.69454	-0.10926	0.00938	0.20474	0
LOC4339104	501.54	489.4	480.66	361.22	426.15	454.55	703.26	486.27	533.6	308.09	240.25	221.27	490.533	413.973	574.377	256.537	-0.19425	0	0.44989	0	-0.72056	0
LOC4324179	4.33	3.77	3.22	26.21	48.45	27.99	13.67	13.51	12.59	39.2	42.77	32.05	3.773	34.217	13.257	38.007	3.18799	0	-1.3681	0	0.14916	1e-05
LOC4330438	39.73	46.5	42.71	39.9	27.9	37.45	47.07	36.95	35.12	28.19	22.43	27.77	42.98	35.083	39.713	26.13	-0.2351	0.00026	0.14662	0.03469	-0.46878	0
LOC4345871	1.51	1.57	1.62	3.05	4.04	2.95	2.56	3.46	2.83	3.97	5.71	4.54	1.567	3.347	2.95	4.74	1.10242	0	-0.18493	0.08922	0.49881	0
LOC4352918	32.61	36.1	24.65	42.4	57.39	46.51	35.04	44.98	35.94	54.38	48.93	50.64	31.12	48.767	38.653	51.317	0.66349	0	-0.33786	0	0.06758	0.01334
LOC4326746	1.44	1.72	1.55	3.31	1.88	2.72	2.16	0.83	1.57	1.08	0.21	0.74	1.57	2.637	1.52	0.677	0.77678	1e-05	-0.81147	0	-1.98256	0
LOC107275713	0.04	0	0	0	0.13	0.04	0	0.04	0	0	0	0	0.013	0.057	0.013	0	2.04484	0.18874	-2.0154	0.22072	NA	NA
LOC4333134	88.74	86.36	90.01	56.12	85.11	81.48	104.39	88.88	78.71	76.69	57.69	65.6	88.37	74.237	90.66	66.66	-0.22166	0	0.27545	0	-0.17142	0
LOC4328220	0.73	0.69	0.69	0.62	0.9	0.98	0.33	0.57	0.74	1.54	1.23	1.23	0.703	0.833	0.547	1.333	0.22806	0.30044	-0.57413	0.0137	0.70383	9e-05
LOC4325193	50.17	42.92	49.15	27.99	29.84	24.74	30.5	33.88	27.76	26.74	24.66	26.32	47.413	27.523	30.713	25.907	-0.77037	0	0.15136	6e-05	-0.09544	0.01705
LOC9266754	2.13	2.27	1.9	5.68	7.55	6.08	3.63	4.85	4.42	4.46	5.92	4.69	2.1	6.437	4.3	5.023	1.62695	0	-0.58132	0	-0.35895	0
LOC9268172	3.48	4.45	3.8	6.46	8.87	7.28	6.12	8.4	6.97	12.63	11.09	8.7	3.91	7.537	7.163	10.807	0.97108	0	-0.08488	0.4759	0.50534	0
LOC4341770	4.06	4.75	4.81	1.61	1.44	2.05	1.77	1.67	2.37	2.76	2.88	2.33	4.54	1.7	1.937	2.657	-1.35668	0	0.14733	0.46981	0.61451	0.00019
LOC107276932	1.97	1.86	2.48	1.9	2.99	2.63	1.73	1.54	1.26	1.6	1.15	1.26	2.103	2.507	1.51	1.337	0.26933	0.07059	-0.73566	0	-0.91653	0
LOC4338597	2.09	1.89	2.39	1.69	0.26	1.31	3.16	4.22	3.67	0.63	0.26	0.75	2.123	1.087	3.683	0.547	-0.91293	0.00023	1.72711	0	-1.01984	0.00412
LOC4336784	1.86	2.11	2.06	2.77	3.88	3.79	5.23	3.8	3.51	2.6	2.72	2.4	2.01	3.48	4.18	2.573	0.79923	0	0.26145	0.00229	-0.43858	0
LOC4335640	47.7	50.09	49.82	70.76	69.19	68.81	36.48	45.28	37.84	51.1	48.47	52.47	49.203	69.587	39.867	50.68	0.5411	0	-0.82668	0	-0.4698	0
LOC4329766	0	0	0	0	0.08	0	0.07	0	0.2	0.52	0.15	0.37	0	0.027	0.09	0.347	NA	NA	0.9846	0.63939	3.78752	0.00061
LOC4342321	0.98	0.72	0.8	0.67	0.38	0.68	3.09	4.76	4.38	2.84	2.57	2.71	0.833	0.577	4.077	2.707	-0.51068	0.03397	2.81365	0	2.22117	0
LOC4328818	14.35	15.26	15.58	18.1	15.18	20.93	13.37	19.46	16.66	15.75	17.12	16.45	15.063	18.07	16.497	16.44	0.27479	0	-0.13819	0.00066	-0.14475	0.0003
LOC107277033	0	0	0.05	0	0	0	0	0.03	0	0	0	0	0.017	0	0.01	0	NA	NA	NA	NA	NA	NA
LOC4344276	881.35	859.53	911.24	377.38	433.62	365.52	334.24	390.3	324.11	619.48	727.49	676.57	884.04	392.173	349.55	674.513	-1.11079	0	-0.15643	0	0.7048	0
LOC4324328	139.34	140.33	146.73	147.67	141.02	132.16	173.79	138.12	145.51	103.43	86.15	86.13	142.133	140.283	152.473	91.903	-0.00288	0.93405	0.10118	0.00036	-0.63521	0
BGIG39947_32132	8.37	9.66	10.47	13.8	13.69	13.05	10.67	13.06	12.3	12.31	13.09	12.9	9.5	13.513	12.01	12.767	0.51603	0	-0.17411	3e-05	-0.08673	0.03831
LOC9267214	0.14	0.18	0.09	0.32	0.52	0.41	0.23	0.46	0.41	0.55	0.6	0.59	0.137	0.417	0.367	0.58	1.6298	0.00246	-0.18532	0.71243	0.4732	0.23692
LOC4325119	38.24	38.2	36.86	40.72	37.83	36.22	27.58	34.56	33.29	37.71	38.72	37.84	37.767	38.257	31.81	38.09	0.0338	0.3122	-0.27342	0	-0.01561	0.66481
LOC4325441	12.05	14.26	11.24	22.91	18.09	19.09	15.03	17.33	17.34	20.2	18.1	18.09	12.517	20.03	16.567	18.797	0.70528	0	-0.28842	0	-0.10906	0.07588
LOC9267024	35.38	38.57	32.07	97.76	101.63	78.74	44.95	52.64	53.35	77.97	83.02	84.48	35.34	92.71	50.313	81.823	1.42052	0	-0.89508	0	-0.19679	0
LOC4336366	0.61	0.45	0.3	2.03	3.69	2.38	2.65	1.85	1.75	4.87	3.71	3.55	0.453	2.7	2.083	4.043	2.60283	0	-0.38577	0.10146	0.56512	0.00276
LOC4324540	0.41	0.43	0.64	2.27	1.28	2.27	1.03	1.33	1.7	4.33	4.32	3.7	0.493	1.94	1.353	4.117	1.99446	0	-0.52892	0.00179	1.07236	0
LOC107281197	0	0	0.04	0	0	0.04	0.07	0.07	0	0.04	0	0	0.013	0.013	0.047	0.013	0.04484	0.98677	1.9846	0.22803	-0.01984	0.99567
LOC4325771	1.34	1.64	1.6	5.97	7.04	5.97	5.35	5.95	5.75	10.69	12.8	11.39	1.527	6.327	5.683	11.627	2.0635	0	-0.15959	0.05327	0.87039	0
LOC4338405	0	0	0	0.07	0.2	0.09	0	0	0	0.02	0.02	0	0	0.12	0	0.013	5.36677	1e-05	-5.33733	1e-05	-3.34177	8e-05
LOC107275962	0	0.06	0	0.77	0.06	0.44	0.03	0.06	0.03	0	0	0	0.02	0.423	0.04	0	4.40907	0	-3.37611	0	-6.41969	0
LOC4330378	7.4	7.3	7.77	6.98	2.52	6.03	9.43	7.14	6.97	0.73	0.92	0.87	7.49	5.177	7.847	0.84	-0.50247	0	0.57967	0	-2.64941	0
LOC4337306	7.95	6.18	6.75	6.6	5.05	5.42	9.53	8.07	9.89	6.17	6.64	6.57	6.96	5.69	9.163	6.46	-0.27293	0.00066	0.67846	0	0.17223	0.04244
LOC4348461	0	0	0	0.07	0	0	0	0	0	0	0.07	0	0	0.023	0	0.023	NA	NA	NA	NA	-0.01984	0.99567
LOC4339699	1.52	1.76	1.93	4.78	6.44	4.3	2.55	4.35	4.12	4.82	4.77	5.13	1.737	5.173	3.673	4.907	1.70461	0	-0.5147	2e-05	-0.06663	0.59177
LOC4347765	0.34	0	0.22	0.22	0.45	0.64	0.33	0.11	0.67	0.55	0.34	0.66	0.187	0.437	0.37	0.517	1.30787	0.09445	-0.27843	0.71718	0.20255	0.76547
LOC4325310	24.48	21.36	22.6	29.49	30.88	22.68	16.32	23.61	18.61	25.67	28.05	26.41	22.813	27.683	19.513	26.71	0.29544	0	-0.51121	0	-0.06091	0.1723
LOC4347646	42.42	38.9	38.2	40.21	49.77	43.4	65.34	47.35	54.78	34.64	31.54	25.57	39.84	44.46	55.823	30.583	0.21915	0.00051	0.3029	0	-0.57552	0
LOC107276559	0	0.02	0.02	0	0.03	0	0	0	0	0	0.07	0.02	0.013	0.01	0	0.03	0.04484	0.98352	NA	NA	1.30209	0.31146
LOC4344766	12.48	15	12.84	20.4	30.52	23.09	25.27	24.88	23.15	28.85	28.13	28.87	13.44	24.67	24.433	28.617	0.89805	0	-0.0215	0.74114	0.19779	0.00015
BGIG39947_32131	1.41	1.44	1.53	3.56	2.52	3.27	3.22	4.34	3.58	4.8	5.64	5.76	1.46	3.117	3.713	5.4	1.12191	0	0.25733	0.00023	0.78394	0
LOC107278189	0.38	0.18	0.18	0.36	0.37	0.5	0.53	0	0	0.9	0.56	0	0.247	0.41	0.177	0.487	0.85219	0.38214	-1.23779	0.25775	0.17281	0.85112
LOC9270747	11.22	11.1	10.87	9.92	15.77	12.57	11.53	9.76	8.89	14.06	13.4	11.42	11.063	12.753	10.06	12.96	0.29341	0	-0.36412	0	0.04952	0.35531
LOC4334896	504.98	506.71	482.39	350.31	400.16	375.03	447.4	408.87	392.6	358.61	301.91	330.27	498.027	375.167	416.29	330.263	-0.37581	0	0.14589	0	-0.19619	0
LOC4331411	4.83	4.65	4.43	3.72	4.64	4.01	4.15	3.16	3.85	6.08	6.43	4.49	4.637	4.123	3.72	5.667	-0.14992	0.26342	-0.16365	0.2772	0.43959	0.00036
LOC4331817	17.88	20.7	17.42	12.88	12.34	17.24	16.96	16.31	16.77	25.67	18.24	25.49	18.667	14.153	16.68	23.133	-0.36843	0	0.21809	0.00298	0.6874	0
LOC4342612	4.64	6.14	5.18	15.27	25.61	23.53	13.86	14.25	11.56	29.39	27.71	25.47	5.32	21.47	13.223	27.523	2.0502	0	-0.71604	0	0.33604	0
LOC4333274	4.29	3.52	3.27	7.18	6.03	7.17	7.04	6.19	6.01	4.67	3.83	4.77	3.693	6.793	6.413	4.423	0.94968	0	-0.11728	0.53336	-0.65909	0.00024
LOC9271697	174.08	101.88	126.77	68.68	118.8	117.6	137.09	106.67	78.79	79.65	73.7	50.48	134.243	101.693	107.517	67.943	-0.35266	0	0.06036	0.11018	-0.61024	0
LOC4341303	37.63	39.44	37.1	32.68	29.97	33.12	40.29	32.54	33.01	25.56	22.06	26.78	38.057	31.923	35.28	24.8	-0.22351	0	0.12969	0.01372	-0.38932	0
LOC4335922	4.49	4.35	3.49	23.49	20.3	16.22	3.88	7.56	5.47	18.46	21.51	23.16	4.11	20.003	5.637	21.043	2.29584	0	-1.83255	0	0.06854	0.04527
LOC4328043	33.35	31.52	34.27	46.5	55.08	45.85	28.25	34.17	30.74	55.44	46.77	53.32	33.047	49.143	31.053	51.843	0.56184	0	-0.67011	0	0.0837	0.00166
LOC4343069	130.32	134.84	136.68	108.27	81.38	99.34	106.03	108.56	120	80.22	79.01	78.07	133.947	96.33	111.53	79.1	-0.44313	0	0.19413	0	-0.30526	0
LOC4343616	0.97	1.2	1.58	0.29	0.52	0.56	0.8	0.89	0.77	4.4	3.67	4.5	1.25	0.457	0.82	4.19	-1.4316	0	0.83608	0.00256	3.18452	0
LOC4347295	3.03	3.93	2.39	5.78	7.22	5.36	3.42	4	3.42	8.5	6.91	7.41	3.117	6.12	3.613	7.607	0.98769	0	-0.76619	0	0.30694	0.0002
LOC4336739	121.32	117.65	117.94	105.8	121.12	101.44	110.67	114.97	115.61	143.17	145.16	130.66	118.97	109.453	113.75	139.663	-0.09362	4e-05	0.04777	0.05408	0.32993	0
LOC4336412	13.96	14.22	12.76	14.3	12.37	12.56	13.07	13.35	13.22	15.28	15.39	14.98	13.647	13.077	13.213	15.217	-0.03787	0.60277	0.00241	0.98881	0.20255	0.00234
LOC4346548	24.78	23.81	22.8	24.01	26.12	24.02	24.32	24.37	25.85	29.2	30.63	30.55	23.797	24.717	24.847	30.127	0.07196	0.0349	0.00276	0.95667	0.27905	0
LOC4340353	30.44	32.53	32.63	34.92	42.79	45.77	49.63	43.32	43.06	37.23	30.65	30.78	31.867	41.16	45.337	32.887	0.39724	0	0.13938	0.00018	-0.33892	0
LOC107275936	0	0.05	0	0	0.47	0	0.1	0.05	0.15	1.41	0.81	0.95	0.017	0.157	0.1	1.057	3.21476	0.00917	-0.60036	0.50495	2.78752	0
LOC4324814	1.5	1.24	1.16	2.45	4.33	3.42	1.88	2.09	1.65	2.19	2.93	2.12	1.3	3.4	1.873	2.413	1.39763	0	-0.86339	0	-0.49993	2e-05
LOC4332042	165.82	156.53	157.17	137.16	135.98	129.03	173.16	151.95	182.52	163.78	151.71	156.76	159.84	134.057	169.21	157.417	-0.23564	0	0.32762	0	0.22095	0
LOC4343205	23	22.85	23.53	18.78	12.45	13.1	16.28	22.31	23.22	16.24	15.71	15.13	23.127	14.777	20.603	15.693	-0.63057	0	0.47069	0	0.07539	0.10828
LOC107275470	0.75	0.62	0	0	1.2	0.45	2.18	2.07	1	1.13	0.57	0.45	0.457	0.55	1.75	0.717	0.35785	0.66201	1.64817	0.00266	0.3485	0.64327
LOC4337588	3.04	2.59	3.95	3.12	4.64	3.97	3.44	2.28	3.18	5.98	8.68	6.14	3.193	3.91	2.967	6.933	0.2975	0.02055	-0.3977	0.00288	0.82025	0
LOC9270154	35.8	35.57	33.45	40.09	50.37	45.72	53.56	44.8	45.44	50.75	47.1	40.02	34.94	45.393	47.933	45.957	0.33825	0	0.06903	0.21147	0.02027	0.72668
LOC9268136	6.26	9.38	6.04	10.02	10.21	10.73	13.48	10.96	10.62	10.99	11.48	11.53	7.227	10.32	11.687	11.333	0.55734	0	0.15855	0.1566	0.10841	0.3358
LOC107281092	2.53	3.32	3	4.93	6.09	7.49	7.79	4.84	5.53	7.98	6.02	6.9	2.95	6.17	6.053	6.967	1.12553	0	-0.15462	0.35227	0.21813	0.13537
LOC4352284	7.91	7.44	6.56	7.86	8.45	7.59	9.14	8.06	7.52	7.88	9.02	8.39	7.303	7.967	8.24	8.43	0.14057	0.06254	0.04149	0.62631	0.07261	0.35014
LOC4346438	7.83	6.91	1.59	17.87	31.16	32.91	13.45	25.95	14.77	42.45	25.52	34.98	5.443	27.313	18.057	34.317	2.34435	0	-0.60469	0	0.32123	0
LOC4339363	0	0	0.05	0.01	0	0.04	0.01	0.03	0.01	0	0.03	0.01	0.017	0.017	0.017	0.013	0.07278	0.95727	-0.02581	0.99531	-0.44762	0.72587
LOC4336670	22.28	22.52	22.88	28.53	20.65	22.08	20.91	19.77	24.93	14.16	11.95	10.27	22.56	23.753	21.87	12.127	0.09515	0.04226	-0.12937	0.00725	-0.98355	0
LOC4339938	0.81	0.55	0.55	0.13	0.47	0.03	1.14	0.85	0.52	0.42	0.03	0.19	0.637	0.21	0.837	0.213	-1.58988	1e-05	2.00346	0	0.05416	0.93009
LOC4352856	3.08	3.38	3.71	33.85	4.33	21.97	40.84	24.5	29.7	9.31	13.71	11.44	3.39	20.05	31.68	11.487	2.62805	0	0.6229	0	-0.85024	0
LOC4341487	29.28	27.07	28.68	25.02	18.46	19.93	21.96	22.64	25.58	20.65	22.85	19.42	28.343	21.137	23.393	20.973	-0.39851	0	0.13326	0.01201	-0.02778	0.6378
LOC112936831	0	0	0	0	0	0	0	0	0.14	0	0	0	0	0	0.047	0	NA	NA	NA	NA	NA	NA
LOC4345370	52.89	46.73	57.47	43.03	46.05	51.62	76.31	51.51	56.9	38.65	36.07	33.44	52.363	46.9	61.573	36.053	-0.1092	0.03545	0.36996	0	-0.41006	0
LOC4339566	156.41	155.32	153.34	122.13	95.01	100.93	124.52	113.79	125.28	97.26	99.41	104.94	155.023	106.023	121.197	100.537	-0.53116	0	0.18336	0	-0.08758	1e-05
LOC107280417	0	0	0	0	0	0	0	0	0	0	0.07	0	0	0	0	0.023	NA	NA	NA	NA	NA	NA
LOC4339299	18.23	17.52	16.81	28.08	26.18	27.18	30.75	27.57	28.14	42.38	47.36	40.25	17.52	27.147	28.82	43.33	0.50859	0	0.1686	0.00075	0.65967	0
LOC4342349	1.84	2.3	2.04	5.32	6.3	6.17	3.37	4.69	4.35	8.54	10.94	8.72	2.06	5.93	4.137	9.4	1.54205	0	-0.52648	0	0.65517	0
LOC4342996	172.97	173.09	167.81	167.09	168.71	154.63	204.12	191.85	234.43	192.97	210.83	182.31	171.29	163.477	210.133	195.37	-0.0447	0.02997	0.34723	0	0.24117	0
LOC4350888	2.99	2.83	2.86	2.9	2.37	2.5	3.52	3.78	3.72	1.14	0.85	1.17	2.893	2.59	3.673	1.053	-0.15183	0.09766	0.49846	0	-1.30072	0
LOC112936094	15.77	13.91	16.11	58.85	29.11	42.47	9.36	18.79	10.61	179.6	244.93	241.39	15.263	43.477	12.92	221.973	1.53888	0	-1.77137	0	2.32963	0
LOC4351890	0.03	0	0	0	0	0	0	0	0.07	0.06	0.03	0	0.01	0	0.023	0.03	NA	NA	NA	NA	NA	NA
LOC9266629	0	0	0.14	0	0	0	0.14	0.14	0	0	0	0	0.047	0	0.093	0	NA	NA	NA	NA	NA	NA
LOC4336643	3.32	3.3	3.67	2.7	4.97	3.26	3.84	2.99	4.42	2.51	2.07	2.5	3.43	3.643	3.75	2.36	0.09669	0.42865	0.04045	0.76739	-0.6317	0
LOC107275673	17.67	18.95	17.12	17.57	18.39	14.87	20.46	22.75	23.72	15.59	17.14	13.35	17.913	16.943	22.31	15.36	-0.06998	0.09882	0.39279	0	-0.14832	0.00064
LOC4325636	3.42	2.87	2.35	5	5.56	4.78	2.03	1.33	1.38	4.21	3.24	1.7	2.88	5.113	1.58	3.05	0.86463	0	-1.70966	0	-0.76893	0
LOC4339018	13.07	15.06	18.41	13.56	18.28	17.5	25.32	16.35	18.36	10.25	10.44	8.3	15.513	16.447	20.01	9.663	0.11101	0.26263	0.26719	0.00362	-0.78425	0
LOC4327421	0.21	0.45	0.21	0.27	0.41	0.55	0.43	0.37	0.55	0.27	0.37	0.42	0.29	0.41	0.45	0.353	0.50878	0.17666	0.12211	0.758	-0.21248	0.58612
LOC4345702	72.24	76.97	79.62	59.49	69.63	74.42	89.25	70.64	79.5	61.87	59.55	61.32	76.277	67.847	79.797	60.913	-0.13098	0.00062	0.21613	0	-0.17809	1e-05
LOC112937421	0.12	0.01	0.05	0.14	0.04	0.61	0	0.19	0	0.12	0.01	0.3	0.06	0.263	0.063	0.143	2.11587	0.00094	-2.06502	0.00159	-0.92665	0.09017
LOC112937626	0	0	0	0	0	0	0	0	0	0.65	0	0	0	0	0	0.217	NA	NA	NA	NA	NA	NA
LOC4339800	259.2	263.28	256.18	183.22	166.14	186.4	288.67	222.39	241.96	167.8	159.59	162.89	259.553	178.587	251.007	163.427	-0.51571	0	0.4806	0	-0.14258	0
LOC4344724	281.33	291.7	273.74	261.96	263.44	274.84	317.53	282.97	297.81	240.98	231.81	241.14	282.257	266.747	299.437	237.977	-0.0111	0.69587	0.1334	0	-0.20675	0
LOC4332647	1.52	1.13	1.11	1.06	1.46	1.47	1.71	1.88	1.72	1.45	1.63	1.37	1.253	1.33	1.77	1.483	0.08791	0.62075	0.42696	0.00611	0.17068	0.31493
LOC4347098	7.29	7.52	7.26	5.14	5.16	5.19	5.43	5.44	4.97	7.53	6.08	6.61	7.357	5.163	5.28	6.74	-0.49748	0	0.02602	0.80261	0.37581	0
LOC4348226	17.51	18.31	18.76	21.96	20.87	17.19	17.21	19.92	20.25	23.09	22.49	22.46	18.193	20.007	19.127	22.68	0.15094	0.00037	-0.0794	0.07742	0.16805	3e-05
LOC4335358	9.25	9.55	9.12	11.23	11.22	10.7	10.15	11.16	11.02	12.67	13.21	13.24	9.307	11.05	10.777	13.04	0.26442	6e-05	-0.04423	0.55123	0.22864	0.00019
LOC4347486	21.25	19.98	23.21	34.52	35.45	32.44	21.41	29.48	25.58	34.49	40.4	35.71	21.48	34.137	25.49	36.867	0.67688	0	-0.43397	0	0.09233	0.02843
LOC4331207	166.97	173.81	171.75	117.19	82.69	108.09	124.45	110.23	123.01	87.46	88.91	99.36	170.843	102.657	119.23	91.91	-0.67914	0	0.18726	0	-0.1943	0
LOC4349793	2.65	2.72	2.84	22.59	42.46	22.73	5.06	5.85	5.89	39.52	40.7	31.84	2.737	29.26	5.6	37.353	3.61054	0	-2.39215	0	0.33234	0
LOC4345118	56.48	55.49	54.39	64.52	68.48	65.77	47.49	49.91	48.5	52.49	51.84	53.87	55.453	66.257	48.633	52.733	0.27371	0	-0.45229	0	-0.33761	0
LOC4334964	35.02	34.32	33.27	51.25	49.88	46.45	53.05	47.39	50.27	45.43	47.34	42.94	34.203	49.193	50.237	45.237	0.56613	0	0.00315	0.95869	-0.13481	0.00097
LOC4327707	1.09	1.17	0.9	4.68	4.85	4.87	2.55	3.74	2.93	5.59	5.37	5.4	1.053	4.8	3.073	5.453	2.20171	0	-0.6504	0	0.17799	0.0304
LOC4349393	2.31	2.09	2.08	1.99	3.08	3.05	3.55	2.63	3.18	3.84	3.89	3.54	2.16	2.707	3.12	3.757	0.30837	0.0008	0.22637	0.00971	0.46665	0
LOC4339090	1.07	0.91	1.02	1.79	3.79	2.34	1.72	2.03	1.66	3.19	2.17	1.78	1	2.64	1.803	2.38	0.90253	0	-0.57977	0	-0.29721	0.00065
LOC4332695	14.27	14.22	16.67	6.82	10.5	10.19	14.81	12.78	10.18	7.37	5.22	5.78	15.053	9.17	12.59	6.123	-0.68082	0	0.44211	1e-05	-0.60129	0
LOC107278621	0.99	0.85	1.07	0.66	2.01	1.39	0.97	0.69	0.96	1.01	1.14	0.93	0.97	1.353	0.873	1.027	0.48271	0.00366	-0.62704	0.0003	-0.39759	0.01803
LOC4336788	23.25	21.92	25.48	32.59	24	25.16	23.85	23.8	24	15.37	15.92	13.69	23.55	27.25	23.883	14.993	0.22915	0	-0.20454	0	-0.87549	0
LOC4328005	4.38	3.06	2.95	3.68	6.26	5.61	5.71	4.65	3.89	2.81	2.94	3.17	3.463	5.183	4.75	2.973	0.57697	0	-0.13316	0.10711	-0.78319	0
LOC4331245	14.2	15.85	17.57	13.26	9.17	10.35	13.48	13.77	15.34	5.8	5.11	4.5	15.873	10.927	14.197	5.137	-0.53186	0	0.33268	0	-1.08591	0
LOC9267113	34.27	26.66	35.83	21.2	23.64	23.18	28.33	25.01	25.83	30.13	29.7	23.64	32.253	22.673	26.39	27.823	-0.44891	0	0.1915	0.02342	0.25921	0.00131
LOC4349410	0.45	0.41	0.52	0.65	1.01	0.97	0.67	0.84	0.69	1.82	1.51	1.69	0.46	0.877	0.733	1.673	0.95173	0.00088	-0.26694	0.35216	0.92127	1e-05
LOC4335135	1.17	1.16	1.2	1.54	1.64	1.8	2.12	1.66	1.76	1.09	1.38	0.83	1.177	1.66	1.847	1.1	0.51223	0.00519	0.14745	0.42692	-0.6048	0.00131
LOC4347902	9.48	7.99	8.44	13.81	14.58	13.98	8.33	10.66	10.22	14.13	16.6	17.55	8.637	14.123	9.737	16.093	0.72774	0	-0.54417	0	0.17717	0.00323
LOC107281994	0	0	0	0	0	0	0	0	0.09	0	0	0	0	0	0.03	0	NA	NA	NA	NA	NA	NA
LOC4329975	5.4	4.49	4.5	6.33	7.73	7.63	10.42	10.04	8.77	8.3	7.19	6.57	4.797	7.23	9.743	7.353	0.6038	0	0.42456	0	0.01614	0.83847
LOC4351306	20.8	22.75	24.57	21.96	27.4	28.06	29.95	28.35	31.45	21.33	21.9	20.69	22.707	25.807	29.917	21.307	0.22199	0.00064	0.19541	0.00177	-0.29912	1e-05
LOC9267586	2.62	2.55	2.11	3.11	4.81	3.52	3.71	3.27	2.95	3.46	3.94	3.21	2.427	3.813	3.31	3.537	0.54379	0	-0.1398	0.11758	-0.02771	0.76739
LOC4336312	18.55	19.11	17.82	21.59	18.08	16.84	15.17	17.64	17.63	16.22	17.34	15.89	18.493	18.837	16.813	16.483	0.03238	0.47139	-0.16955	0.00011	-0.20083	0
LOC4325785	2.48	2.85	2.85	4.05	3.54	2.89	3.45	3.24	3.41	3.59	3.53	2.62	2.727	3.493	3.367	3.247	0.37893	0.0009	-0.06084	0.63491	-0.11618	0.32728
LOC4336535	3.61	2.01	2.69	5.78	5.83	8.04	2.3	5.31	3.52	4.19	9.22	5.82	2.77	6.55	3.71	6.41	1.26507	0	-0.83578	0	-0.04932	0.66618
LOC4340648	2.78	3.29	3.77	3.33	2.55	3.24	6.15	6.32	4.92	2.73	2.49	2.63	3.28	3.04	5.797	2.617	-0.08563	0.55125	0.91777	0	-0.23041	0.11984
LOC4343284	0.89	1.1	1.12	1.78	1.45	1.22	0.86	1.36	1.1	1.35	1.49	1.39	1.037	1.483	1.107	1.41	0.5308	0.00017	-0.43022	0.00285	-0.08066	0.587
LOC107278299	14.95	14.66	14.56	16.76	18.78	16.89	13.84	14.77	13.76	19.23	16.26	18.91	14.723	17.477	14.123	18.133	0.27456	6e-05	-0.32009	1e-05	0.03843	0.60512
LOC9266295	5.94	5.12	5.5	13.64	17.14	14.35	11.66	12.95	14.18	17.22	20.05	17.06	5.52	15.043	12.93	18.11	1.46718	0	-0.2269	0.00105	0.25544	4e-05
LOC9267664	0	0	0	0	0	0	0	0.11	0.05	0	0	0	0	0	0.053	0	NA	NA	4.56957	0.00097	NA	NA
LOC4330859	2.66	3	2.86	8.08	6.92	8.1	4.34	6.23	4.88	10.17	13.17	13.04	2.84	7.7	5.15	12.127	1.45032	0	-0.58714	0	0.64556	0
LOC4330180	4.51	4.86	3.91	4.78	10.96	10.17	6.02	6.74	5.81	4.69	5.12	4.61	4.427	8.637	6.19	4.807	0.97453	0	-0.48232	0	-0.84933	0
LOC4340233	0.81	0.98	0.93	1.21	1.78	1.32	1.4	1.59	1.53	1.04	1.62	1.16	0.907	1.437	1.507	1.273	0.66914	0	0.06884	0.62023	-0.17387	0.18065
LOC4324311	7.79	8.04	8.06	11.65	14.35	11.25	7.44	10.59	10.08	14.27	16.64	15.02	7.963	12.417	9.37	15.31	0.65048	0	-0.40927	0	0.29539	0
BGIG39947_31990	8.95	7.65	8.77	5.15	10.11	8.38	8.47	6.34	4.76	17.23	14.75	15.8	8.457	7.88	6.523	15.927	-0.10227	0.02642	-0.27898	0	1.02281	0
LOC4342207	5.88	5.7	6.12	4.16	6.05	4.89	5.53	4.82	5.61	6.4	6.07	5.56	5.9	5.033	5.32	6.01	-0.17513	0.04683	0.07186	0.47888	0.20913	0.01827
LOC9268494	3.22	2.97	3.56	1.81	1.18	2.11	5.7	4.56	4.76	0.87	0.77	0.69	3.25	1.7	5.007	0.777	-0.91031	0	1.54315	0	-1.15342	0
LOC4345188	12.89	12.58	11.69	17.09	25.01	19.47	21.62	19.21	16.82	24.13	27.16	25.45	12.387	20.523	19.217	25.58	0.73215	0	-0.10506	0.00957	0.31749	0
LOC4333581	0	0	0	0	0	0.09	0	0	0	0	0.1	0	0	0.03	0	0.033	NA	NA	NA	NA	-0.01984	0.99567
LOC4342572	11.08	11.79	9.46	12.49	15.56	12.04	10.1	10.85	11.83	15.16	15.48	14.94	10.777	13.363	10.927	15.193	0.31791	0	-0.30248	1e-05	0.16863	0.00686
LOC4349636	13.19	13.21	15.14	9.03	9.16	7.08	11.23	9.64	9.13	10.47	8.7	8.67	13.847	8.423	10	9.28	-0.70018	0	0.21668	0.00519	0.12844	0.10771
LOC4327588	52.02	50.08	47.84	42.04	54.97	62.11	48.67	47.07	41.62	71.6	65.83	66.94	49.98	53.04	45.787	68.123	0.10993	0.00234	-0.22351	0	0.34708	0
LOC9271357	4.92	3.85	3.33	3.85	10.7	8.63	8.48	7.22	7.18	3.42	1.76	2.65	4.033	7.727	7.627	2.61	1.17393	0	-0.2016	0.0575	-1.72405	0
LOC4330834	0	0.11	0.22	0	0	0	0	0	0	0	0	0	0.11	0	0	0	NA	NA	NA	NA	NA	NA
LOC4327408	0.13	0.07	0	0.13	0.55	0.33	0.07	0.14	0.27	0.34	0	0.27	0.067	0.337	0.16	0.203	2.36677	0.00398	-1.11493	0.11806	-0.7568	0.25595
LOC4339369	22.97	22.25	19.35	30.98	26.94	48.28	25.72	27.78	29.26	33.64	39.01	37.67	21.523	35.4	27.587	36.773	0.73558	0	-0.3694	0	0.04296	0.22986
LOC4335778	6.79	6.13	4.47	3.94	4.98	3.68	0.65	1.37	1.14	11.27	14.72	11.76	5.797	4.2	1.053	12.583	-0.43257	0.00072	-2.0154	0	1.56512	0
LOC4342316	0	0.16	0	0.08	0	0	0	0	0	0	0	0	0.053	0.027	0	0	-0.95516	0.62045	NA	NA	NA	NA
LOC4343975	12.76	10.79	11.07	10.68	9.61	10.97	10.26	8.09	9.52	11.34	12.51	11.14	11.54	10.42	9.29	11.663	-0.1268	0.05261	-0.17068	0.0159	0.15553	0.01812
LOC4335173	0	0.1	0	0.03	0	0.06	0.03	0	0.06	0	0	0.03	0.033	0.03	0.03	0.01	0.04484	0.97985	-0.0154	0.99947	-1.6048	0.35916
LOC4352029	45.86	43.68	43.83	39.66	56.54	52.54	60.16	48.46	48.11	47.63	40.86	44.56	44.457	49.58	52.243	44.35	0.18856	1e-05	0.06232	0.17521	-0.17793	5e-05
LOC107276043	0	0.1	0.06	0.58	0.85	0.62	0.1	0.07	0.03	0.86	0.53	0.98	0.053	0.683	0.067	0.79	3.67711	0	-3.38463	0	0.19589	0.4947
LOC4347630	0	0.04	0	0.04	0	0.08	0	0	0.04	0.04	0	0.04	0.013	0.04	0.013	0.027	1.6298	0.33725	-1.60036	0.37788	-0.6048	0.69423
LOC107277294	0	0.05	0.09	0	0.09	0	0	0.09	0.02	0.05	0	0	0.047	0.03	0.037	0.017	-0.54013	0.60249	0.30653	0.80346	-1.01984	0.46281
LOC9269413	15.43	17.91	16.77	14.17	11.7	11.68	13.93	12.39	13.14	7.43	9.27	5.79	16.703	12.517	13.153	7.497	-0.39033	0	0.05877	0.46873	-0.75736	0
LOC4345613	0.2	0.15	0	0.94	2.17	1.39	0.7	0.81	0.55	2.81	1.37	2.29	0.117	1.5	0.687	2.157	3.71322	0	-1.13358	4e-05	0.51566	0.01399
LOC4329955	94.2	93.27	98.47	166.03	138.77	142.06	127.1	163.6	147.78	152.26	160.44	145.7	95.313	148.953	146.16	152.8	0.66295	0	-0.03728	0.04488	0.02439	0.18642
LOC4328078	0.17	0.15	0.12	0.17	0.13	0.17	0.14	0.14	0.17	0.06	0.11	0.03	0.147	0.157	0.15	0.067	0.09375	0.82922	-0.06431	0.90009	-1.22629	0.012
LOC4329429	2.89	3.23	3.13	6.68	6.65	6.82	4.55	5.17	5.52	7.39	9.03	8.06	3.083	6.717	5.08	8.16	1.14156	0	-0.3242	0.00069	0.28702	0.00073
LOC4325761	8.77	9.78	8.02	9.37	9.57	8	5.47	6.62	6.4	10.74	9.9	9.01	8.857	8.98	6.163	9.883	0.03653	0.63971	-0.55203	0	0.12733	0.08234
LOC4324314	0.65	0.53	0.53	1.02	1.41	1.66	0.44	0.58	0.61	0.98	0.93	1.38	0.57	1.363	0.543	1.097	1.24461	0	-1.33422	0	-0.31558	0.03709
LOC4324504	97.26	90.5	83.65	76.92	116.52	103.11	109.62	93.9	87.06	70.24	65.32	52.99	90.47	98.85	96.86	62.85	0.17803	0	-0.05075	0.2231	-0.68269	0
LOC107279019	0.76	0.81	0.46	3.8	1.44	2.93	0.99	1.82	1.4	0.76	0.65	0.75	0.677	2.723	1.403	0.72	2.05511	0	-0.98502	0	-1.94994	0
LOC4327950	0	0	0	0.05	0	0	0.15	0	0	0	0	0.05	0	0.017	0.05	0.017	NA	NA	1.56957	0.38702	-0.01984	0.99567
LOC4336335	0	0	0	0	0	0	0	0	0	0.07	0	0	0	0	0	0.023	NA	NA	NA	NA	NA	NA
LOC4342020	0.75	0.34	0.84	0.55	0.17	0.41	0.4	0.52	0.29	0.05	0.17	0.15	0.643	0.377	0.403	0.123	-0.34159	0.3405	0.08462	0.85064	-1.41982	0.00253
LOC4339855	143.8	140.94	146.97	125.09	128.57	128.34	155.07	135.63	148.89	92.88	95.19	86.68	143.903	127.333	146.53	91.583	-0.15794	0	0.1938	0	-0.48686	0
LOC4331349	0.05	0	0	0	0	0.02	0.02	0	0	0.02	0	0	0.017	0.007	0.007	0.007	-0.95516	0.62045	-0.0154	0.99773	-0.01984	0.99567
LOC4339208	2.88	3.97	2.37	15.13	10.5	14.51	8.25	7.87	5.27	7.86	7.83	7.95	3.073	13.38	7.13	7.88	2.16535	0	-0.93238	0	-0.79243	0
LOC107276483	1.36	0.67	0.99	1.14	1.53	2.31	1.28	1.52	0.67	2.13	1.19	1.97	1.007	1.66	1.157	1.763	0.82911	0.0627	-0.57728	0.20942	0.02597	0.96173
LOC4331869	6.96	7.37	7.42	5.3	6.87	6.31	7.32	5.25	6.22	8.87	8.52	8.18	7.25	6.16	6.263	8.523	-0.19524	0.07549	0.02032	0.88738	0.45522	1e-05
LOC4342261	1.63	1.5	1.84	1.58	2.1	1.99	2.19	2.48	1.87	1.37	1.36	0.98	1.657	1.89	2.18	1.237	0.19132	0.14696	0.20983	0.10237	-0.61478	1e-05
LOC4350827	100.06	99.88	105.82	78.13	60.03	68.91	63.19	72.87	66.46	53.7	43.22	64.08	101.92	69.023	67.507	53.667	-0.54195	0	-0.04345	0.12455	-0.37496	0
LOC4352812	49.79	48.82	48.93	52.83	71.07	65.77	49.41	63.67	52.54	49.3	45.37	45.14	49.18	63.223	55.207	46.603	0.37467	0	-0.2003	0	-0.44639	0
LOC112937989	0	0	0	0	0.04	0	0	0.04	0	0.08	0	0	0	0.013	0.013	0.027	NA	NA	-0.0154	0.99773	0.98016	0.6253
LOC4341254	1.27	1.27	1.09	0.54	0.38	0.83	0.49	0.83	0.61	1.59	0.89	1.58	1.21	0.583	0.643	1.353	-1.02916	1e-05	0.12899	0.6931	1.20255	0
LOC4337610	11.41	10.35	10.3	9.6	8.93	7.49	10.01	9.79	11.48	9.98	9.66	9.07	10.687	8.673	10.427	9.57	-0.28372	4e-05	0.2578	0.00032	0.13112	0.08051
LOC4341136	0.35	0.17	0.17	1.79	0.53	1.76	1.37	1.65	1.38	21.65	34.71	32.03	0.23	1.36	1.467	29.463	2.6298	0	0.07207	0.84909	4.3952	0
LOC107276338	3.12	4.34	5.12	2.68	1.19	2.71	6.46	5.75	5.32	0.37	0.23	0.38	4.193	2.193	5.843	0.327	-0.88568	0	1.38421	0	-2.78642	0
LOC4344770	4.42	3.69	3.8	1.95	4.03	3.39	1.87	2.04	2.37	7.03	7.07	8.05	3.97	3.123	2.093	7.383	-0.62586	0	-0.58571	0	1.47607	0
LOC107280940	0	0.09	0.06	0.09	0.03	0.09	0	0.03	0	0.03	0.06	0	0.05	0.07	0.01	0.03	0.53026	0.57439	-2.82275	0.03996	-1.24223	0.2405
LOC4336000	172.93	166.37	174.45	165.79	178.98	181.55	170.12	173.87	160.06	184.54	185.23	178.85	171.25	175.44	168.017	182.873	0.07883	0.00215	-0.08334	0.00163	0.03363	0.21089
LOC4336941	12.64	12.4	12.78	12.2	13.16	12.59	11.12	12.08	12.77	11.61	12.78	12.6	12.607	12.65	11.99	12.33	0.04052	0.31167	-0.07938	0.05172	-0.06905	0.08531
LOC4343911	17.07	17.32	15.83	28.34	24.89	25.82	16.15	20.2	19.85	24.63	29.35	31.22	16.74	26.35	18.733	28.4	0.67277	0	-0.5015	0	0.09698	0.02124
LOC4326904	2.17	1.68	2.07	0.53	0.63	0.54	0.62	0.65	0.69	0.07	0	0.11	1.973	0.567	0.653	0.06	-1.8352	0	0.21137	0.53984	-3.2525	0
LOC4329424	0.32	0.45	0.32	0.99	1.18	1.5	0.46	0.51	0.41	1.28	1.06	0.68	0.363	1.223	0.46	1.007	1.7818	0	-1.43043	0	-0.29737	0.26499
LOC107279602	0.13	0.03	0.16	0.08	0.16	0.1	0.32	0.18	0.08	0.11	0.12	0.13	0.107	0.113	0.193	0.12	0.13778	0.75558	0.75389	0.03893	0.08535	0.8534
LOC4334713	1.6	1.18	1.12	1.11	1.1	2.11	1.31	1.44	1.84	3.63	4.15	4.19	1.3	1.44	1.53	3.99	0.19027	0.48528	0.06156	0.84077	1.44139	0
LOC4343034	0	0	0	0	0	0	0	0	0	0	0.46	0	0	0	0	0.153	NA	NA	NA	NA	3.98016	0.00935
LOC4331680	68.03	66.01	64.87	75.65	59.62	60	68.09	70.47	73.76	56.03	57.23	58.51	66.303	65.09	70.773	57.257	-0.00636	0.82184	0.11097	1e-05	-0.19782	0
LOC107276160	0.16	0.13	0.03	0	0	0.22	0.26	0.48	0.48	0.51	1.42	2.37	0.107	0.073	0.407	1.433	-0.46974	0.55282	2.42518	0	4.26027	0
LOC9271833	0.03	0.08	0.03	0.03	0.01	0.03	0	0.03	0.03	0.29	0.5	0.39	0.047	0.023	0.02	0.393	-0.95516	0.25187	-0.33733	0.78277	4.06762	0
LOC4345887	19.31	20.64	22.79	12.6	9.89	10.02	12.19	13.86	11.57	4.07	2.91	3.57	20.913	10.837	12.54	3.517	-0.92274	0	0.19645	0.01046	-1.63915	0
LOC4328100	22.23	25.14	24.4	29.8	21.27	22.6	22.6	26.44	24.57	20.86	19.77	19.97	23.923	24.557	24.537	20.2	0.06208	0.21718	-0.01465	0.80442	-0.29755	0
LOC107276898	0.62	0.56	0.74	2.29	2.92	2.92	2.05	2.27	2.65	3.44	3.28	3.22	0.64	2.71	2.323	3.313	2.08856	0	-0.22643	0.11756	0.28288	0.0253
LOC4338792	29.29	29.02	28.03	29.81	31.36	34.27	24.99	27.43	29.08	29.82	30.51	31.66	28.78	31.813	27.167	30.663	0.15721	0	-0.23171	0	-0.05995	0.06708
LOC4339977	13.31	13.46	13.45	15.02	21.22	20.36	18.87	16.03	19.24	24.11	22.2	23.57	13.407	18.867	18.047	23.293	0.51125	0	-0.07612	0.27007	0.28975	0
LOC4327697	20.87	18.72	21.23	23.87	19.24	20.91	26.72	23.69	21.12	19.81	15.2	16.6	20.273	21.34	23.843	17.203	0.11461	0.11303	0.14001	0.05034	-0.3352	0
LOC107277187	0	0	0	0	0	0	0	0	0	0	0.04	0	0	0	0	0.013	NA	NA	NA	NA	NA	NA
LOC4325895	2.37	3.26	2.41	2.57	2.61	2.29	1.82	2.89	2.35	3.03	4.08	3.55	2.68	2.49	2.353	3.553	-0.09457	0.42533	-0.0883	0.50701	0.50681	0
LOC4333022	6.79	6.95	7.04	10.07	9.52	7.88	6.4	6.74	6.94	8.74	8.91	9.43	6.927	9.157	6.693	9.027	0.43462	0	-0.4721	0	-0.03552	0.6526
LOC4344285	52.94	52.39	50.4	54.93	70.39	72.96	77.19	87.96	75.86	46.19	39.27	45.43	51.91	66.093	80.337	43.63	0.36458	0	0.2745	0	-0.60764	0
LOC4330610	71.62	68.3	72.68	81.39	89.57	90.6	81.97	101.67	79.15	78.35	77.12	78.11	70.867	87.187	87.597	77.86	0.31639	0	-0.00185	0.95969	-0.17333	0
LOC4338010	8.57	11.57	11.43	5.81	3.7	4.95	4.11	4.92	4.65	5.12	5.15	6.12	10.523	4.82	4.56	5.463	-1.10396	0	-0.09429	0.41022	0.16599	0.10099
LOC4352327	3.58	3.58	3.63	5.59	6.41	4	4.16	4.62	3.94	5.48	6.18	6.12	3.597	5.333	4.24	5.927	0.57408	0	-0.33414	0	0.14867	0.01805
LOC112939402	2.53	2.69	2.83	2.97	2.84	3.97	4.43	5.2	4.13	1.15	1.32	1.58	2.683	3.26	4.587	1.35	0.30174	0.02234	0.48025	3e-05	-1.28445	0
LOC107276130	0.05	0.08	0.05	0.08	0.04	0.06	0.06	0.07	0.08	0.22	0.15	0.07	0.06	0.06	0.07	0.147	0.04484	0.93615	0.22561	0.65978	1.27562	0.00046
LOC107278666	1.48	1.49	1.33	2.02	2.44	2.03	3.34	2.83	2.5	3.05	3.03	3.2	1.433	2.163	2.89	3.093	0.61026	0	0.40292	0.00026	0.50866	0
LOC4349472	52.82	49.33	45.83	32.75	57.52	53.68	48.99	36.38	37.96	48.8	39.99	42.24	49.327	47.983	41.11	43.677	-0.01066	0.8219	-0.23455	0	-0.15117	0.00063
LOC4324427	12.09	10.44	12.34	8.48	9.33	7.87	12.3	9.53	11.71	11.53	12.75	10.26	11.623	8.56	11.18	11.513	-0.41194	0	0.37609	3e-05	0.409	0
LOC4346362	0	0.03	0.03	0	0.04	0.03	0.04	0	0	0.07	0.04	0	0.02	0.023	0.013	0.037	0.04484	0.98352	-1.0154	0.62983	0.56512	0.71412
LOC4344171	12.54	11.68	9.08	11.56	13.49	11.8	10.35	10.42	9.84	12.45	13.11	11.13	11.1	12.283	10.203	12.23	0.18342	0.05557	-0.28438	0.00408	-0.02795	0.79328
LOC4330612	0.45	1.23	0.28	5.34	4.79	6.72	0.46	0.46	1.27	25.48	46.79	48.33	0.653	5.617	0.73	40.2	3.11768	0	-2.95073	0	2.82857	0
LOC4350180	0	0	0	0	0	0.08	0	0	0	0	0	0	0	0.027	0	0	NA	NA	NA	NA	NA	NA
LOC4334297	12.15	11.11	12.92	10.53	13.63	11.8	17.78	15.17	14.48	11.59	12.56	11.31	12.06	11.987	15.81	11.82	0.01159	0.88939	0.39079	0	-0.03166	0.70114
LOC4326743	1.35	1.08	1.14	1.71	1.02	1.44	0.7	1.08	1.05	0.7	0.74	0.76	1.19	1.39	0.943	0.733	0.23844	0.12145	-0.56392	0.0005	-0.93514	0
LOC4337853	181.74	190.61	179.31	138.23	135.61	125.44	138.08	153.79	162.05	133.91	132.42	122.53	183.887	133.093	151.307	129.62	-0.45382	0	0.17934	0	-0.0461	0.00466
LOC4329362	171.95	167.49	170.55	114.13	142.76	148.58	254.79	154.96	180.24	125.29	97.19	97.29	169.997	135.157	196.663	106.59	-0.26225	0	0.51167	0	-0.38277	0
LOC4325329	121.55	130.83	119.61	257.42	307.11	253.78	146.47	191.21	157.48	250.56	250.97	238.91	123.997	272.77	165.053	246.813	1.14961	0	-0.72261	0	-0.15385	0
LOC4341615	10.21	10.68	9.86	12.55	17.79	15.76	15.41	12.93	13.27	13.23	12.38	11.47	10.25	15.367	13.87	12.36	0.59237	0	-0.14981	0.00078	-0.31532	0
LOC4339576	1.2	1.32	0.97	3.89	4.41	4.15	2.15	3.06	2.17	3.4	3.18	3.72	1.163	4.15	2.46	3.433	1.84403	0	-0.75874	0	-0.27255	0.00545
LOC9271852	0.38	0.25	0.43	0.53	1.44	0.94	0.76	0.95	0.87	1.06	1.19	0.91	0.353	0.97	0.86	1.053	1.31554	0	-0.16453	0.26076	0.11059	0.42292
LOC107280821	0	0	0.05	0	0	0	0	0	0	0	0	0	0.017	0	0	0	NA	NA	NA	NA	NA	NA
LOC9270831	4.59	4.43	4.01	10.12	10.22	9.57	8.32	10.24	9.76	10.31	12.92	10.41	4.343	9.97	9.44	11.213	1.2105	0	-0.07789	0.18198	0.16796	0.00119
LOC9272159	0.04	0	0	0	0	0.01	0.03	0	0	0	0	0	0.013	0.003	0.01	0	-1.54013	0.36574	0.9846	0.63939	NA	NA
LOC107275615	2.73	2.55	2.34	3.5	4.59	4.67	3.87	3.97	3.74	3.65	3.8	3.44	2.54	4.253	3.86	3.63	0.75169	0	-0.14336	0.11805	-0.23206	0.00853
LOC4346192	0.34	0.33	0.5	0.44	0.76	0.78	0.34	0.91	0.62	3.77	3.64	2.9	0.39	0.66	0.623	3.437	0.7818	0.05998	-0.10029	0.82413	2.36658	0
LOC4347432	2.07	1.99	2.25	2.33	2.78	2.57	2.63	2.21	2.38	2.74	2.14	2.18	2.103	2.56	2.407	2.353	0.30357	0.05712	-0.09659	0.58666	-0.13173	0.43042
LOC4342000	23.98	23.14	22.15	12.76	15.36	13.81	22.93	20.52	18.72	17.47	14.38	14.58	23.09	13.977	20.723	15.477	-0.70034	0	0.55737	0	0.13327	0.06085
LOC4334564	10.42	10.01	8.69	7.54	8.11	7.19	9.28	8.85	10.44	7	7.17	6.01	9.707	7.613	9.523	6.727	-0.33587	0	0.3165	1e-05	-0.1882	0.01692
LOC107278712	10.25	9.64	9.66	11.47	10.31	9.14	8.54	8.93	10.18	7.2	7.25	5.92	9.85	10.307	9.217	6.79	0.07569	0.13959	-0.16627	0.00136	-0.60911	0
LOC107279872	0.11	0.09	0.14	0.38	0.44	0.25	0.33	0.35	0.38	0.45	0.61	0.43	0.113	0.357	0.353	0.497	1.71072	0	-0.00668	0.98588	0.4842	0.00156
LOC9267059	2.58	3.61	3.2	6.82	14.18	9.21	9.18	9.97	8.9	21.72	21.85	20.32	3.13	10.07	9.35	21.297	1.55717	0	-0.15742	0.06439	1.06115	0
LOC4336811	2.4	2.9	3.21	6.38	8.97	7.75	4.99	4.26	4.21	11.8	10.97	10.9	2.837	7.7	4.487	11.223	1.49594	0	-0.8045	0	0.51068	0.00011
LOC4330720	26.78	31.22	30.36	32	22.31	19.87	18.04	26.4	26.59	27.58	29.08	27.46	29.453	24.727	23.677	28.04	-0.23546	0	-0.07175	0.07807	0.16973	0
LOC4352874	1.1	1.3	0.99	1.59	2.16	1.72	1.01	1.27	0.86	2.78	4.15	3.15	1.13	1.823	1.047	3.36	0.70195	2e-05	-0.82451	0	0.86292	0
LOC4324815	11.81	10.57	11.97	15.19	15.7	15.4	11.28	13.26	12.76	16.79	18.14	14.62	11.45	15.43	12.433	16.517	0.44639	0	-0.31781	0	0.08972	0.09963
LOC4339220	0.35	0.29	0.29	0.81	0.89	1.15	0.93	0.97	0.88	0.72	0.51	0.52	0.31	0.95	0.927	0.583	1.61907	0	-0.03709	0.87419	-0.71089	0.00064
LOC4324481	50.02	41.68	43.19	37.95	46.07	44.93	43.73	27.21	30.75	19.62	11.9	11.56	44.963	42.983	33.897	14.36	-0.01096	0.86638	-0.36516	0	-1.61239	0
LOC4344581	65.3	64.33	61.63	54.73	55.98	68.72	90.31	52.48	62.27	40.69	39.2	39.32	63.753	59.81	68.353	39.737	-0.051	0.2216	0.17405	1e-05	-0.61308	0
LOC4332639	237.44	251.23	255.2	266.58	245.61	275.11	338.62	257.69	287.44	187.55	160.11	154.12	247.957	262.433	294.583	167.26	0.12281	0	0.14693	0	-0.67516	0
LOC4343312	63.01	73.38	63.92	85.08	91.18	95.68	91.86	98.87	88.02	117.15	106.91	109.67	66.77	90.647	92.917	111.243	0.48304	0	0.01479	0.72527	0.27021	0
LOC4343931	85.75	81.62	83.62	62.53	46.95	51.41	51.4	59.86	62.18	46.39	44.47	45.72	83.663	53.63	57.813	45.527	-0.61952	0	0.09644	0.00194	-0.25059	0
LOC4352765	0.34	0.62	0	9.24	16.22	11.8	0.24	1.84	1.88	20.89	10.56	14.34	0.32	12.42	1.32	15.263	5.30599	0	-3.24093	0	0.28886	7e-05
LOC4344066	27.66	30.31	30.12	30.86	32.33	26.5	21.64	26.37	27.12	27.16	27.19	26.2	29.363	29.897	25.043	26.85	0.01651	0.68056	-0.25625	0	-0.15251	6e-05
LOC4335963	57.98	62.61	58.6	42.7	40.89	40.88	54.41	46.32	48.54	34.02	32.05	29.22	59.73	41.49	49.757	31.763	-0.48708	0	0.2438	0	-0.40894	0
LOC4329740	22.7	20.37	21.59	22.91	28.24	23.44	24.55	25.11	25.62	29.78	34.11	29.94	21.553	24.863	25.093	31.277	0.19007	3e-05	-0.01204	0.82707	0.27116	0
LOC4328521	18.44	18.13	20	29.05	28.09	27.37	22.72	26.28	26.83	39.21	43.73	40.83	18.857	28.17	25.277	41.257	0.67905	0	-0.20017	0	0.53732	0
LOC4328371	0.95	0.87	0.83	1.94	2.5	2.12	2.13	1.72	2.37	1.67	1.1	1.04	0.883	2.187	2.073	1.27	1.33024	0	-0.08163	0.69014	-0.79745	4e-05
LOC4323840	6.85	6.07	6.11	12.22	16.25	11.83	6.46	7.79	6.43	28.8	32.82	29.16	6.343	13.433	6.893	30.26	1.10373	0	-0.9712	0	1.16003	0
LOC107275770	0	0.01	0.12	0	0.03	0	0	0	0	0	0	0.08	0.043	0.01	0	0.027	-2.26097	0.1936	NA	NA	1.56512	0.45375
LOC4329673	12.97	11.86	11.43	16.07	21.27	19.48	16.15	16.92	15.33	17.44	16.45	18.08	12.087	18.94	16.133	17.323	0.66325	0	-0.23738	1e-05	-0.13627	0.00955
LOC4350606	11.53	12.32	12.14	16.24	14.27	13.11	10.9	14.41	14.26	14.38	16.36	16.19	11.997	14.54	13.19	15.643	0.27941	0	-0.14382	4e-05	0.09167	0.0066
LOC4338638	8.04	8.18	7.31	13.15	11.82	9.43	5.86	7.1	6.82	11.23	11.44	10.96	7.843	11.467	6.593	11.21	0.55733	0	-0.80257	0	-0.03938	0.40836
LOC9268565	0.19	0.15	0.22	1.02	1.19	0.81	0.88	0.82	0.68	0.81	1.13	1.36	0.187	1.007	0.793	1.1	2.45987	0	-0.35243	0.15696	0.12312	0.60604
LOC4328060	98.97	104.77	74.7	212.39	172.98	159.56	67.82	68.35	64.31	117.74	106.38	129.04	92.813	181.643	66.827	117.72	0.98985	0	-1.45387	0	-0.6383	0
LOC4343678	54.32	52.99	55.68	39.58	44.44	43.87	46.59	47.28	43.38	37.88	35.69	36.42	54.33	42.63	45.75	36.663	-0.33815	0	0.09584	0.0009	-0.22427	0
LOC9269803	0	0.18	0.03	0.2	0.22	0.11	0.06	0	0.03	0.06	0.04	0.09	0.07	0.177	0.03	0.063	1.26605	0.05574	-2.459	0.00286	-1.46345	0.0355
LOC4343938	28.68	36.11	37.63	47.37	49.74	52.13	41.12	36.15	34.68	35.2	33.45	35.18	34.14	49.747	37.317	34.61	0.57378	0	-0.42985	0	-0.54192	0
LOC4330034	1651.4	1701.51	1551.35	1375.49	2238.61	1977.86	1396.38	1651.28	1446.23	4665.58	4806.05	5767.91	1634.75	1863.99	1497.96	5079.85	0.19748	0	-0.31699	0	1.44417	0
LOC4339596	7.24	7.97	5.82	23.76	25.46	19.27	6.71	9.84	8.29	23.4	30.65	28.12	7.01	22.83	8.28	27.39	1.71829	0	-1.47187	0	0.25585	0
LOC4334265	0.35	0.22	0.22	0.72	1.09	0.91	4.33	7.68	5.23	0.48	0.58	0.37	0.263	0.907	5.747	0.477	1.7863	0	2.66099	0	-0.92842	0.00012
LOC4342210	69.58	69.55	66.17	89.09	75.32	73.11	65.02	88.54	87.19	108.5	128.31	113.84	68.433	79.173	80.25	116.883	0.23008	0	0.00726	0.79766	0.55122	0
LOC9266289	0.72	0.57	0.68	0.39	0.94	0.98	0.76	0.69	1.08	1.74	1.46	1.08	0.657	0.77	0.843	1.427	0.24076	0.41223	0.13661	0.65646	0.88552	0.00011
LOC4338523	5.81	5.12	5.5	7.27	5.16	5.74	4.2	5.47	5.2	7.71	9.04	8.06	5.477	6.057	4.957	8.27	0.17166	0.03756	-0.28614	0.00076	0.44198	0
LOC4352850	18.45	15.56	17.95	13.94	12.17	11.74	12.27	13.03	12.69	6.86	6.09	5.09	17.32	12.617	12.663	6.013	-0.42923	0	-0.00717	0.94454	-1.08397	0
LOC4327193	36.31	35.21	38.13	40.43	37.45	33.68	37.87	38.35	45.01	32.85	37.03	32.55	36.55	37.187	40.41	34.143	0.04357	0.25053	0.11112	0.00231	-0.135	0.00029
LOC4327300	386.64	389.08	400.06	227.01	172.92	205.84	268.31	260.31	297.76	165.6	165.67	168.75	391.927	201.923	275.46	166.673	-0.93692	0	0.43725	0	-0.28981	0
LOC4350273	0.68	0.49	0.74	1.12	1.13	0.88	1.11	1.06	0.8	1.21	1.21	1.07	0.637	1.043	0.99	1.163	0.85518	0	-0.14636	0.34906	0.09472	0.52378
LOC4326654	12.2	10.28	11.38	7.23	10.03	10.42	15.44	10.86	11.35	6.6	7	6.49	11.287	9.227	12.55	6.697	-0.26854	0.00068	0.434	0	-0.47507	0
LOC4326910	0.23	0.28	0.51	0.67	0.29	1.79	1.19	1.26	1.93	23.75	9.25	11.78	0.34	0.917	1.46	14.927	1.48962	0.00012	0.63668	0.02462	3.9875	0
LOC4325584	1.71	2.15	2.34	6.69	6.71	7.03	5.56	5.17	3.94	9.59	13.91	12.39	2.067	6.81	4.89	11.963	1.75575	0	-0.49527	0.00019	0.7895	0
LOC107276234	0	0	0.03	0.03	0	0	0	0	0.03	0	0.07	0.07	0.01	0.01	0.01	0.047	0.04484	0.98677	-0.0154	0.99773	1.98016	0.21451
LOC4335749	0.69	0.39	0.84	0.2	0.36	0.34	0.75	1.45	0.89	0.25	0.4	0.35	0.64	0.3	1.03	0.333	-1.07064	0.00994	1.76887	0	0.13216	0.81626
LOC107279082	0	0	0	0.03	0.06	0.06	0	0.09	0	0	0.09	0.03	0	0.05	0.03	0.04	3.36677	0.05016	-0.75236	0.54755	-0.34177	0.76761
LOC4347937	1.33	1.18	1.94	0.73	0.89	0.58	0.89	0.59	0.6	0.42	0.95	0.55	1.483	0.733	0.693	0.64	-0.99688	0.00011	-0.0856	0.82641	-0.20625	0.56653
LOC4331018	104.15	102.09	102.86	110.04	173.04	158.75	163.96	144.42	132.1	137.06	110.63	119.11	103.033	147.277	146.827	122.267	0.53399	0	-0.01171	0.62556	-0.27787	0
LOC112936625	0.1	0.11	0	0.17	0.11	0.31	0.24	0.12	0.06	0.27	0.07	0.24	0.07	0.197	0.14	0.193	1.35689	0	-0.59609	0.00533	-0.1385	0.51405
LOC4344870	0	0	0	0	0	0	0	0	0	0	0.02	0	0	0	0	0.007	NA	NA	NA	NA	NA	NA
LOC4337050	91.35	95.91	91.43	82.27	59.19	63.89	82.15	73.77	75.64	43.39	45.58	43.11	92.897	68.45	77.187	44.027	-0.39612	0	0.15081	0.00016	-0.66473	0
LOC4327478	36.04	34.81	38.01	32.79	36.3	34.07	46.96	36	41.29	27.5	21	24.75	36.287	34.387	41.417	24.417	-0.05674	0.2398	0.25544	0	-0.50954	0
LOC4342293	0.38	0.35	0.35	0.97	2.29	1.87	1.58	1.72	1.2	2.29	2.63	2.58	0.36	1.71	1.5	2.5	2.28362	0	-0.1976	0.38379	0.54873	0.00221
LOC4352130	0.2	0.23	0.13	0.3	0.03	0.13	0.4	0.47	0.56	0.13	0.13	0.3	0.187	0.153	0.477	0.187	-0.23527	0.68954	1.60351	0.00023	0.26027	0.6704
LOC4330826	1.87	1.74	1.96	2	2.49	2.18	2.87	2.16	2.65	1.34	0.5	0.64	1.857	2.223	2.56	0.827	0.27058	0.02171	0.20067	0.08089	-1.43086	0
LOC4349344	1.38	1.26	1.17	1.45	2.52	2.53	2.24	1.85	2.07	3.97	2.96	2.83	1.27	2.167	2.053	3.253	0.79024	1e-05	-0.08421	0.66066	0.57643	7e-05
LOC4338307	8.72	6.42	5.71	2.15	1.77	2.19	0.79	0.47	0.81	10.05	14.49	15.59	6.95	2.037	0.69	13.377	-1.70012	0	-1.60036	3e-05	2.67236	0
LOC107276543	0	0.07	0	0.03	0	0	0	0	0	0.03	0	0	0.023	0.01	0	0.01	-0.95516	0.62045	NA	NA	-0.01984	0.99567
LOC4337361	38.54	35.51	34.72	33.86	21.91	34.44	27.56	33.65	32.34	38.71	48.34	48.19	36.257	30.07	31.183	45.08	-0.23601	0	0.03069	0.5572	0.56094	0
LOC4328535	0.08	0.03	0.05	0.07	0.16	0.09	0	0.02	0.07	0.02	0.05	0	0.053	0.107	0.03	0.023	0.91655	0.12274	-1.88566	0.00795	-2.18346	0.00286
LOC4331480	7.22	7.37	6.27	8.39	9.21	8.23	6.11	6.57	6.82	9.07	9.72	8.53	6.953	8.61	6.5	9.107	0.3184	0	-0.40874	0	0.07532	0.21763
LOC9271618	1.89	1.72	1.99	4.54	2.12	4.9	5.54	4.79	4.53	1.69	3.09	2.72	1.867	3.853	4.953	2.5	1.08473	0	0.33767	0.01601	-0.65145	5e-05
LOC4340285	8.07	8.69	7.67	6.54	8.81	9.61	10.7	10.58	9.61	7.57	7.53	6.98	8.143	8.32	10.297	7.36	0.05939	0.58125	0.2943	0.00227	-0.19328	0.06884
LOC4327060	0.67	1.35	0.48	1.54	2.55	1.61	2.86	1.37	1.87	1.88	1.26	1.51	0.833	1.9	2.033	1.55	0.97849	0	-0.33733	0.06492	-0.02835	0.88598
LOC4337522	18.48	16.24	17.61	15.36	21.24	16.37	13.43	17.06	15.87	17.32	18.32	17.36	17.443	17.657	15.453	17.667	0.10562	0.00496	-0.21178	0	-0.02625	0.52412
LOC9266794	1.92	1.48	1.48	2.58	2.52	2.56	3.66	4.69	3.77	4.82	4.85	5.15	1.627	2.553	4.04	4.94	0.66933	0	0.65429	0	0.94349	0
LOC4331195	1.68	1.76	1.12	3.02	3.23	4.22	2.61	2.75	2.7	1.87	1.85	1.69	1.52	3.49	2.687	1.803	1.23737	0	-0.38442	0.00519	-0.98031	0
LOC9272562	6.41	5.57	6.29	5.01	5.8	4.64	6.23	6.85	6.13	7.06	7.9	5.95	6.09	5.15	6.403	6.97	-0.22852	0.01911	0.29929	0.00232	0.41848	1e-05
LOC4333413	10.23	10.9	8.74	19.93	28.73	23.11	11.8	12.59	9.5	12.51	9.36	10.48	9.957	23.923	11.297	10.783	1.27005	0	-1.08417	0	-1.15117	0
LOC4332293	24.05	35.44	21.63	19.45	24.24	19.38	7.09	7.22	10.6	22.25	23.43	21.8	27.04	21.023	8.303	22.493	-0.45188	0	-1.24742	0	0.21341	0
LOC107275933	2.98	2.78	2.35	2.01	2.76	2.46	3.33	2.24	2.36	3.29	3.47	2.55	2.703	2.41	2.643	3.103	-0.32953	0.00091	0.04748	0.70586	0.42159	2e-05
LOC9266852	1.1	0.68	0.55	1.41	0.81	0.91	1.11	1.02	1.1	1.01	0.74	0.64	0.777	1.043	1.077	0.797	0.45987	0.10534	0.02642	0.94237	-0.40686	0.16157
LOC9266574	4.67	3.28	3.28	2.79	2.61	3.19	3.21	2.98	3.58	1.57	1.57	1.22	3.743	2.863	3.257	1.453	-0.36739	0.00293	0.17373	0.2161	-0.99204	0
LOC4329509	6.8	5.72	5.83	8.44	8.36	10.38	13.99	12.25	11.04	5.98	6.4	5.34	6.117	9.06	12.427	5.907	0.5874	0	0.4447	0	-0.63066	0
LOC4339683	629.03	648.57	638.47	575.06	392.47	460.98	491.31	556.41	651.67	441.71	417.18	418.28	638.69	476.17	566.463	425.723	-0.38555	0	0.23017	0	-0.18585	0
LOC4329135	41.09	41.18	40.02	47.14	42.63	40.51	42.54	43.48	48.98	40.04	41.77	38.48	40.763	43.427	45	40.097	0.1077	0.0006	0.04335	0.19855	-0.12551	8e-05
LOC107281619	0.26	0.22	0.17	0.35	0.74	0.57	0.97	0.85	0.95	0.87	0.8	0.59	0.217	0.553	0.923	0.753	1.36677	0	0.71926	2e-05	0.42377	0.01875
LOC4327678	143.16	144.2	145.23	162.39	129.06	150.51	139.7	150.42	154.88	126.16	117.85	125.5	144.197	147.32	148.333	123.17	0.06341	0.00701	-0.00724	0.8004	-0.2786	0
LOC4338100	0.41	0.84	0.93	2.4	4.54	3.65	2.52	2.68	2.46	3.11	2.03	2.31	0.727	3.53	2.553	2.483	2.28859	0	-0.46773	3e-05	-0.50929	0
LOC4349102	47.11	44.23	42.77	96.77	106.54	113.69	149.92	137.74	120.92	96.73	102.1	92.93	44.703	105.667	136.193	97.253	1.25505	0	0.35917	0	-0.12812	0
LOC4328580	27.55	27.68	28.79	32.73	22.93	25.32	35.15	35.23	38.51	22.44	21.75	19.46	28.007	26.993	36.297	21.217	-0.03601	0.34589	0.41729	0	-0.35963	0
LOC4346982	29.05	27.1	29.56	25.17	25.65	20.2	27.76	26.94	29.31	26.31	24.69	24.98	28.57	23.673	28.003	25.327	-0.25633	0	0.23566	0	0.08875	0.03826
LOC4329347	66.91	67.85	63.14	34.82	38.41	40.84	26.52	29.03	26.55	40.56	36.11	38.41	65.967	38.023	27.367	38.36	-0.78195	0	-0.48047	0	0.00541	0.88561
LOC4349995	31.4	34.91	34.93	34.98	33.6	31.81	23.99	30.73	27.92	25.08	22.97	23.62	33.747	33.463	27.547	23.89	0.00703	0.876	-0.30406	0	-0.50759	0
LOC4325342	0.07	0.18	0.2	0.11	0.27	0.62	0.35	0.22	0.23	0.25	0.13	0.15	0.15	0.333	0.267	0.177	1.21965	3e-05	-0.38846	0.15978	-0.9668	0.00065
LOC4346494	1.96	1.73	2.14	3.51	3.47	3.46	2.1	2.74	2.83	4.45	4.78	3.71	1.943	3.48	2.557	4.313	0.86	0	-0.45486	0.0012	0.29585	0.0166
LOC4329349	17.01	17.92	18.06	17.85	18.67	17.36	17.81	20.33	19.11	21.09	21.24	18.87	17.663	17.96	19.083	20.4	0.03458	0.49963	0.07711	0.12914	0.17317	0.0002
LOC4343085	10.49	8.58	10.21	6.39	7.95	7.88	7.9	8.18	7.35	8.64	7.25	9.72	9.76	7.407	7.81	8.537	-0.39102	0	0.07928	0.44834	0.20734	0.02473
LOC4345650	9.5	10.39	12.79	12.3	12.95	11.26	10.28	11.44	9.3	13.88	14.72	14.79	10.893	12.17	10.34	14.463	0.18478	0.01988	-0.24721	0.00253	0.2344	0.00156
BGIG39947_32173	0.25	0.29	0.2	1.61	1.89	0.64	0.49	1.19	0.59	1.43	1.55	0.93	0.247	1.38	0.757	1.303	2.51299	0	-0.86687	0.00173	-0.0911	0.73542
LOC4331085	0.12	0.04	0.19	1.98	0.04	5.93	0	0.04	0.04	0.59	0.79	0.62	0.117	2.65	0.027	0.667	4.54762	0	-6.68811	0	-2.03034	0
LOC4331816	0.07	0	0.03	0.33	0.24	0.24	0.07	0.3	0.1	0.17	0.27	0.3	0.033	0.27	0.157	0.247	3.04484	2e-05	-0.79301	0.13845	-0.14537	0.77586
LOC4344923	103.93	109.11	94.3	78.5	80.94	80.24	72.13	68.75	63.5	60.87	51.48	58.16	102.447	79.893	68.127	56.837	-0.33732	0	-0.24026	0	-0.50362	0
LOC4347002	4.33	3.57	3.57	2.88	3.03	3.14	3.91	3.3	3.08	3.37	3.48	2.26	3.823	3.017	3.43	3.037	-0.32161	0.01829	0.17619	0.24965	-0.00321	0.99298
LOC4344528	15.51	15.96	14.95	25.91	24.7	26.38	22.81	26.44	26.01	26.91	26.87	24.75	15.473	25.663	25.087	26.177	0.75531	0	-0.04597	0.43188	0.01259	0.83401
LOC4336046	45.12	40.71	43.32	41.16	32.25	36.32	48.22	42.76	48.57	35.42	39.86	29.69	43.05	36.577	46.517	34.99	-0.19821	1e-05	0.32868	0	-0.08242	0.09021
LOC4341079	0.24	0.1	0.32	0.18	0.18	0.27	0.36	0.14	0.25	0.58	0.59	0.47	0.22	0.21	0.25	0.547	0.04484	0.93122	0.1481	0.76735	1.31359	0.0001
LOC4336292	271.65	294.18	287.53	217.58	181.86	241.81	279.27	238.79	261.57	140.45	135.57	138.94	284.453	213.75	259.877	138.32	-0.33591	0	0.24345	0	-0.6757	0
LOC9268084	0	0.14	0	0.14	0.15	0.14	0	0.29	0	0.14	0	0.29	0.047	0.143	0.097	0.143	1.6298	0.33725	-0.60036	0.71157	-0.01984	0.99568
LOC4337571	5.71	5.86	5.94	10.94	10.29	9.15	7.32	8.84	8.43	11.86	12.76	12.38	5.837	10.127	8.197	12.333	0.80265	0	-0.30906	0	0.2788	0
LOC4343122	740.06	747.51	808.55	650.27	826.03	766.29	545.88	593.97	470.32	572.04	418.27	523.01	765.373	747.53	536.723	504.44	-0.00856	0.41494	-0.48974	0	-0.58102	0
LOC4324160	11.97	11.87	11.84	13.6	14.67	12.33	14.14	14.75	15.46	15.26	16.13	14.34	11.893	13.533	14.783	15.243	0.18024	0.00033	0.11266	0.02559	0.16823	0.00046
LOC4340933	33.85	31.92	34.83	25.08	19.48	18.98	24.13	28.1	28.43	19.5	18.79	17.68	33.533	21.18	26.887	18.657	-0.66265	0	0.33501	0	-0.19338	0
LOC107281353	0	0	0	0.11	0.11	0	0.11	0	0.11	0	0	0	0	0.073	0.073	0	NA	NA	-0.0154	0.99952	NA	NA
LOC4341490	3.89	4.17	4.22	5.56	4.98	4.15	5.04	5.64	6.11	5.26	5.83	4.62	4.093	4.897	5.597	5.237	0.27737	0.00055	0.20292	0.0085	0.08731	0.28463
LOC4347687	80.96	73.48	77.8	98.56	93.53	83.37	113.68	95.4	93.9	87.55	83.33	77.89	77.413	91.82	100.993	82.923	0.24362	0	0.11729	9e-05	-0.15852	0
LOC4351036	0.56	0.66	0.57	3.06	4.02	2.96	0.84	0.98	1.31	3.86	3.92	4.23	0.597	3.347	1.043	4.003	2.48706	0	-1.6774	0	0.25755	0.00054
LOC107275664	0	0	0	0.04	0	0	0.04	0	0	0	0	0	0	0.013	0.013	0	NA	NA	-0.0154	0.99773	NA	NA
LOC4336030	10.84	10.4	9.24	10.61	8.26	9.76	12.2	10.72	11.92	12.19	11.32	9.57	10.16	9.543	11.613	11.027	-0.06302	0.46795	0.26871	0.00084	0.19027	0.02022
LOC4324964	38.6	43.7	40.39	45.34	61.18	49.79	32.56	31.39	31.24	44.2	36.21	36.97	40.897	52.103	31.73	39.127	0.37341	0	-0.72535	0	-0.42622	0
LOC4326933	15.45	13.76	15	4.84	1.1	3.37	10.7	11.84	11.94	1.85	0.88	1.82	14.737	3.103	11.493	1.517	-2.22359	0	1.87169	0	-1.04932	0
LOC4335776	8.8	8.29	7.14	14.57	25.54	20.71	19.16	25.46	21.04	26.32	30.98	26.03	8.077	20.273	21.887	27.777	1.34472	0	0.10302	0.0824	0.44331	0
LOC4343461	5.96	5.74	5.18	4.05	1.81	4.9	7.26	9.43	8.14	0.91	0.95	0.5	5.627	3.587	8.277	0.787	-0.62192	0	1.1882	0	-2.21248	0
LOC4342488	269.67	276.08	272.59	278.05	243.99	258.73	287.69	299.22	281.44	216.04	209.29	201.26	272.78	260.257	289.45	208.863	-0.02631	0.20717	0.13243	0	-0.34296	0
LOC4339518	11.07	9.22	11.02	15.05	15.06	13.34	11.08	11.98	10.24	18.21	21.96	18.57	10.437	14.483	11.1	19.58	0.48883	0	-0.39186	0	0.42495	0
LOC4328094	1.31	1.31	1.81	1.48	2.39	2.46	1.81	1.78	1.82	3.33	3.77	2.91	1.477	2.11	1.803	3.337	0.52637	0.00065	-0.22485	0.16073	0.65742	0
LOC4327357	136.27	141.16	145.03	132.33	95.27	113.85	110.54	115.87	126.16	85.7	92.82	91.11	140.82	113.817	117.523	89.877	-0.27482	0	0.02892	0.31665	-0.36162	0
LOC9268710	0	0.09	0.05	0.4	0.05	0.19	0.24	0.14	0.24	0.25	0.15	0.2	0.047	0.213	0.207	0.2	1.6298	0.08749	0.51512	0.48622	-0.18976	0.82423
LOC4329624	14.37	13.09	13.94	17.11	18.28	15.3	17.55	15.06	14.61	15.29	13.92	13.14	13.8	16.897	15.74	14.117	0.30107	0	-0.11046	0.03802	-0.26945	0
LOC4325319	73.15	67.57	73.2	60.79	72.57	64.09	48.85	57.49	51.16	68.92	71.79	69.72	71.307	65.817	52.5	70.143	-0.09793	0.00038	-0.33378	0	0.08195	0.00378
LOC4327614	4.48	3.73	4.31	3.47	5.17	3.84	5.71	5.49	5.8	4.38	5.02	3.98	4.173	4.16	5.667	4.46	-0.00111	0.98772	0.44704	0	0.10003	0.1581
LOC4347865	8.68	7.81	7.51	5	6.49	4.92	5.82	5.47	4.77	5.7	6.68	6.19	8	5.47	5.353	6.19	-0.70614	0	-0.08972	0.32343	0.13877	0.08916
LOC9269384	2.25	2.87	2.18	5.73	8.37	6.99	5	5.51	4.39	7.57	8.07	7.23	2.433	7.03	4.967	7.623	1.54403	0	-0.51147	0	0.11304	0.18893
LOC9269516	3.51	4	4.52	2.91	4.41	2.2	2.85	2.11	3.25	3.17	2.9	2.39	4.01	3.173	2.737	2.82	-0.30569	0.0988	-0.22201	0.31615	-0.18597	0.38598
LOC4325169	56.76	59.17	59.43	58.55	53.67	52.88	53.4	60.11	61.38	56.25	58.35	50.63	58.453	55.033	58.297	55.077	-0.0668	0.02989	0.07309	0.02158	-0.0119	0.73611
LOC4329322	0.03	0.07	0.1	0.24	0.25	0.83	1.81	0.98	1.28	0.28	0.1	0.21	0.067	0.44	1.357	0.197	2.7078	0	1.60704	0	-1.1803	0.00586
LOC4333061	6.14	4.91	5.81	6.14	5.31	4.36	5.87	6.27	6.45	7.31	7.8	7.53	5.62	5.27	6.197	7.547	-0.07992	0.29254	0.22635	0.00186	0.50963	0
LOC107281192	0	0.1	0	0	0.16	0	0.05	0.03	0.05	0.05	0	0.04	0.033	0.053	0.043	0.03	0.6443	0.66323	-0.27843	0.86405	-0.80571	0.61192
LOC4342251	0.49	0.2	0.53	1.42	2.79	2	0.58	0.54	1.14	3.2	2.36	2.97	0.407	2.07	0.753	2.843	2.36677	0	-1.46286	0	0.45178	0.00541
LOC107277860	0.06	0.11	0.39	0.22	0.87	0.17	0.06	0.06	0.06	0.11	0.11	0.06	0.187	0.42	0.06	0.093	1.18234	0.03456	-2.88987	0.00013	-2.15734	0.00112
LOC4327865	36.51	35.34	34.59	47.29	47.05	42.86	33.39	42.46	37.55	31.82	35.06	33.19	35.48	45.733	37.8	33.357	0.37684	0	-0.27993	0	-0.46182	0
LOC4350083	37.78	37.64	37.72	221.42	165.75	187.68	43.31	49.64	57.74	125.3	162.55	135.75	37.713	191.617	50.23	141.2	2.37515	0	-1.95035	0	-0.45981	0
LOC4344189	26.66	22.77	23.87	29.61	26.82	27.42	31.14	27.5	28.19	27.42	28.44	24.37	24.433	27.95	28.943	26.743	0.22338	3e-05	0.03589	0.54923	-0.08207	0.13868
LOC4341653	0.53	0.52	0.73	0.89	1.47	0.68	1.84	0.58	1.32	0.9	0.75	0.47	0.593	1.013	1.247	0.707	0.79026	0.01437	0.30146	0.30891	-0.5308	0.0983
LOC4346673	27.4	28.05	26.61	31.52	27.42	26.54	21.91	28.01	28.52	31.72	37.03	34.1	27.353	28.493	26.147	34.283	0.07101	0.0274	-0.12997	7e-05	0.2588	0
LOC4325361	43.79	46.81	42.71	56.8	92.02	78.12	72.25	66.61	61.74	73	61.79	60.78	44.437	75.647	66.867	65.19	0.79486	0	-0.18898	0	-0.22929	0
LOC4338911	155.95	169.73	200.07	98.33	40.98	83.04	173.16	198.13	221.23	23.09	16.53	17.15	175.25	74.117	197.507	18.923	-1.19939	0	1.38852	0	-1.9986	0
LOC4338452	37.67	30.96	34.56	31.09	43.62	34.2	35.85	31.68	36.42	38.49	31.14	32.01	34.397	36.303	34.65	33.88	0.09255	0.00839	-0.04695	0.21854	-0.14298	5e-05
LOC4335860	0.1	0.19	0.11	0.14	0.23	0.29	0.04	0.41	0.27	0.1	0.09	0.06	0.133	0.22	0.24	0.083	0.68869	0.0436	0.1481	0.66792	-1.34177	0.00041
LOC4331476	16.67	22.22	19.49	15.22	16.38	15.78	19.31	14.6	14.34	15.74	12.58	14.83	19.46	15.793	16.083	14.383	-0.19354	0.05516	-0.03947	0.7528	-0.16692	0.13351
LOC4331858	13.55	13.35	13.46	18.94	21.42	18.46	24.19	20.24	22.09	8.42	6.61	5.64	13.453	19.607	22.173	6.89	0.57287	0	0.1646	0.01348	-1.52584	0
LOC9269307	0	0.01	0	0.02	0.05	0.02	0.02	0.02	0.03	0.05	0.02	0.04	0.003	0.03	0.023	0.037	3.04484	0.01693	-0.20804	0.82883	0.43959	0.57169
LOC4326984	10.86	10.3	11.4	8.99	8.78	8.15	13	11.67	12.23	11.03	10.99	10.48	10.853	8.64	12.3	10.833	-0.31043	1e-05	0.50049	0	0.31477	1e-05
LOC4337401	0.11	0	0	0	0	0	0	0.02	0.04	0	0	0	0.037	0	0.02	0	NA	NA	NA	NA	NA	NA
LOC4325907	10.5	9.93	10.09	10.37	13.74	12.16	12.31	11.09	11.98	14.85	14.22	11.78	10.173	12.09	11.793	13.617	0.26319	3e-05	-0.04111	0.56772	0.16337	0.00715
LOC4339443	1.15	1.07	1.07	1.5	2.98	2.16	1.35	1.27	1.49	3.24	2.75	3.02	1.097	2.213	1.37	3.003	1.07428	0	-0.67897	7e-05	0.48523	0.00049
LOC4329805	0.24	0	0	1.74	0.74	1.01	1.75	1.78	0.72	1.92	1.62	1.43	0.08	1.163	1.417	1.657	3.91931	0	0.25309	0.46851	0.47493	0.12326
LOC9267012	0.01	0	0.01	0	0.02	0.03	0.04	0.03	0.03	0.05	0.06	0.06	0.007	0.017	0.033	0.057	1.36677	0.27383	1.24764	0.12909	1.98016	0.00365
LOC4324047	31.63	29.76	29.85	28.71	25.66	24.18	24.99	25.39	25.92	30.06	31.13	30.22	30.413	26.183	25.433	30.47	-0.20627	2e-05	-0.03312	0.58081	0.20423	3e-05
LOC4331644	20.03	18.27	17.55	14.8	13.06	12.5	14.64	15.66	20.59	14.1	18.45	13.67	18.617	13.453	16.963	15.407	-0.4573	0	0.3292	0	0.18752	3e-05
LOC4351467	5.94	6.63	6.77	7.09	8.05	8.19	6.54	7.59	7.79	9.04	10.11	9.03	6.447	7.777	7.307	9.393	0.28882	0.0005	-0.09726	0.27767	0.26111	0.00066
LOC4348972	4.55	5.35	3.82	26.12	15.16	23.26	8.95	11.4	10.9	12.06	12.28	16.22	4.573	21.513	10.417	13.52	2.27678	0	-1.07049	0	-0.69672	0
LOC4343608	24.9	23.91	24.42	54.63	59	52.42	31.98	37.55	36.88	43.74	47.8	45.91	24.41	55.35	35.47	45.817	1.21686	0	-0.67378	0	-0.28274	0
LOC4342055	0.64	0.33	0.12	1.18	1.04	1.47	0.49	0.65	0.73	0.58	0.59	1	0.363	1.23	0.623	0.723	1.7818	0	-0.99155	2e-05	-0.77698	0.00048
LOC112936100	0.86	0.64	0.6	0.77	0.75	0.67	0.63	0.63	0.7	0.39	0.62	0.4	0.7	0.73	0.653	0.47	0.16547	0.32081	-0.33347	0.05485	-0.72124	4e-05
LOC9272621	10	9.24	8.49	7.8	12.3	9.53	8.96	9.16	8.36	7.27	6.68	6.7	9.243	9.877	8.827	6.883	0.09495	0.13574	-0.15663	0.0166	-0.53047	0
LOC4344422	1.55	1.71	1.76	2.68	1.15	1.79	3.64	3.84	3.32	1.93	3.03	3.01	1.673	1.873	3.6	2.657	0.18234	0.20908	0.92683	0	0.48756	0.0001
LOC4336281	15.06	16.72	16.09	16.28	20.62	20.23	20.55	14.7	14.89	17.72	15.4	15.86	15.957	19.043	16.713	16.327	0.27585	0	-0.19762	0.00095	-0.234	7e-05
LOC4326030	1.12	1.28	0.49	4.46	6.22	4.96	2.78	2.55	2.65	3.99	4.58	4.14	0.963	5.213	2.66	4.237	2.49298	0	-0.96712	0	-0.29806	0.00023
LOC9269399	0	0	0.06	0.14	0.09	0.06	0.17	0.17	0.06	0.34	0.29	0.37	0.02	0.097	0.133	0.333	2.36677	0.01972	0.47003	0.5077	1.78752	0.00029
LOC4329290	3.36	2.92	3.56	3.06	4.95	3.42	3.65	3.62	3.27	2.24	1.42	1.86	3.28	3.81	3.513	1.84	0.23093	0.06745	-0.12019	0.38109	-1.05707	0
LOC4352839	93.52	100.68	105.2	140.48	78.6	101.02	65.26	89.01	84.11	244.09	348.88	328.64	99.8	106.7	79.46	307.203	0.12488	0	-0.44199	0	1.50609	0
LOC4345297	1.67	1.62	1.46	2.99	3.71	2.96	2.6	3.37	3.64	2.95	4.06	3.16	1.583	3.22	3.203	3.39	1.032	0	-0.05462	0.53654	0.12218	0.11527
LOC112936637	2.22	5.24	2.77	1.46	2.1	1.26	0.79	2.38	0.8	0.99	0.9	0.84	3.41	1.607	1.323	0.91	-1.06763	0	-0.27193	0.17534	-0.83696	4e-05
LOC4329277	0.36	0.37	0.14	0.55	0.88	0.82	1.23	1.23	1.28	1.46	0.82	1.05	0.29	0.75	1.247	1.11	1.38187	0.00033	0.72157	0.00984	0.56512	0.04863
LOC4329084	1.81	1.47	2.05	3.34	9.69	6.07	4.31	4.77	4.58	8.2	8.16	7.19	1.777	6.367	4.553	7.85	1.8419	0	-0.47872	0	0.30358	3e-05
LOC4324413	12.06	9.75	11.26	7.53	7.76	7.48	11.02	9.58	9.6	10.04	9.68	7.93	11.023	7.59	10.067	9.217	-0.52301	0	0.40007	0	0.27044	0.0001
LOC107278438	0.97	1.25	1.08	3.63	4.26	5.94	5.85	5.73	4.81	4.13	3.95	4.39	1.1	4.61	5.463	4.157	2.09975	0	0.22653	0.10732	-0.17118	0.25423
LOC4352578	0.29	0.2	0.36	0.32	0.36	0.41	0.26	0.39	0.28	0.33	0.22	0.26	0.283	0.363	0.31	0.27	0.33434	0.28905	-0.1529	0.65847	-0.37493	0.24909
LOC4336897	18.89	21.92	18.35	47.94	40.07	38.11	14.25	19.2	17.3	26.53	33.26	31.35	19.72	42.04	16.917	30.38	1.11592	0	-1.32581	0	-0.48379	0
LOC4331882	22.47	22.85	27.37	33.18	28.1	33.42	31.83	29.06	31.03	28.12	26.8	29.13	24.23	31.567	30.64	28.017	0.4346	0	-0.06969	0.34494	-0.2047	0.00275
LOC4343003	154.73	158.16	166	100.67	88.34	94.47	126.04	112.7	119.78	72.57	64.34	68.98	159.63	94.493	119.507	68.63	-0.74017	0	0.33093	0	-0.47192	0
LOC4331769	26.85	30.91	27.05	40.37	29.41	35.77	55.82	44.09	44.73	18.38	17.61	15.69	28.27	35.183	48.213	17.227	0.38642	0	0.42063	0	-1.07454	0
LOC4332563	64.94	63.73	63.89	45.63	42.2	43.42	47.14	44.75	52.69	60.54	67.43	55.05	64.187	43.75	48.193	61.007	-0.53194	0	0.13158	0.00013	0.46603	0
LOC4339191	339.75	310.21	310	186.63	277.59	260.86	373.98	338.91	303.61	252.42	206.42	231.48	319.987	241.693	338.833	230.107	-0.39201	0	0.48344	0	-0.07702	0
LOC4337952	1.95	1.51	1.48	3.6	3.1	3.04	3.17	3.64	3.51	3.68	3.39	3.84	1.647	3.247	3.44	3.637	0.96478	0	0.06875	0.45667	0.12435	0.14071
LOC4329715	10.98	7.51	9.5	2.54	2.15	2.18	1.87	2.24	2.08	5.9	6.19	4.27	9.33	2.29	2.063	5.453	-1.98758	0	-0.16902	0.50217	1.22732	0
LOC9268832	556.19	594.8	583.7	407.62	432.64	492.31	604.33	509.49	504.44	307.32	285.29	270.47	578.23	444.19	539.42	287.693	-0.32773	0	0.25471	0	-0.6588	0
LOC4327021	0.03	0.12	0.03	0.06	0.19	0.09	0.09	0.15	0.06	0.06	0.12	0	0.06	0.113	0.1	0.06	1.16031	0.11398	-0.25641	0.72779	-1.13532	0.13023
LOC4327502	3.16	1.89	2.34	5.53	4.29	3.78	4.09	5.88	5.63	5.16	6.09	5.45	2.463	4.533	5.2	5.567	0.89452	0	0.18908	0.02088	0.28552	0.00022
LOC4324458	20.15	16.96	18.92	10.38	13.82	13.84	15.47	10.77	12.98	18.23	15.85	13.26	18.677	12.68	13.073	15.78	-0.50586	0	0.02468	0.83385	0.28985	0.00148
LOC4348270	2	2.03	1.8	2.6	3.62	4.07	4.1	4.49	4.06	4.01	4.12	4.16	1.943	3.43	4.217	4.097	0.8348	0	0.2892	0.02459	0.24499	0.05651
LOC4341645	369.87	347.23	361.56	330.69	326.91	299.65	244.9	304.69	285.45	298.94	270.85	268.12	359.553	319.083	278.347	279.303	-0.16085	0	-0.20226	0	-0.19915	0
LOC4333435	3.89	2.94	3.5	9.68	9.75	9.03	10	10.46	10.18	17.95	18.57	16.49	3.443	9.487	10.213	17.67	1.48644	0	0.10504	0.18901	0.88849	0
LOC4342064	0.18	0.3	0.3	1.03	1.26	1.45	0.79	0.62	0.49	1.41	1.61	1.16	0.26	1.247	0.633	1.393	2.27513	0	-0.99194	0.00269	0.13689	0.6458
LOC107277956	3.45	3.4	3.03	4.48	4.02	4.46	2.71	3.12	2.62	2.6	2.27	3.11	3.293	4.32	2.817	2.66	0.41232	0.00037	-0.62927	0	-0.71172	0
LOC9268143	0.37	0.43	0.22	0.58	0.15	0	0	0.07	0.07	0.15	0.07	0.14	0.34	0.243	0.047	0.12	-0.44059	0.50541	-2.33733	0.0261	-1.01984	0.23058
LOC107280582	0.02	0	0.05	0.03	0.02	0	0.02	0	0.03	0.03	0	0.05	0.023	0.017	0.017	0.027	-0.3702	0.76799	-0.0154	0.99947	0.71713	0.55141
LOC4344091	620.14	605.44	617.21	275.69	335.48	353.82	469.59	368.65	381.07	319.48	233.86	290.07	614.263	321.663	406.437	281.137	-0.89276	0	0.3189	0	-0.2172	0
LOC4339679	0	0	0	0.04	0.12	0.04	0	0	0	0	0	0	0	0.067	0	0	3.36677	0.05016	-3.33733	0.06239	-3.34177	0.05636
LOC4324881	30.66	29.33	31.87	29.44	34.02	28.61	30.99	34.28	34.82	33.91	30.95	30.05	30.62	30.69	33.363	31.637	0.01963	0.64823	0.1139	0.00457	0.03455	0.42317
LOC4344956	0	0	0	0	0	0	0	0.21	0.07	0	0	0	0	0	0.093	0	NA	NA	NA	NA	NA	NA
LOC9272431	0.41	0.15	0.24	1.13	0.41	0.41	0.27	0.27	0.4	0.72	0.87	0.25	0.267	0.65	0.313	0.613	1.33553	0.0003	-1.06764	0.00357	-0.11962	0.72831
LOC4340661	0.17	0	0	3.22	3.96	8.78	4.81	4.48	6.78	4.92	3.22	5.23	0.057	5.32	5.357	4.457	6.63729	0	-0.02289	0.91055	-0.29037	0.08189
LOC4348573	0.99	0.61	0.72	0.91	1.23	1.26	1.89	1.66	1.11	0.69	0.62	0.99	0.773	1.133	1.553	0.767	0.57353	0.0223	0.44403	0.04387	-0.57238	0.02533
LOC4348360	1.38	1.01	1.68	0.82	0.27	0.44	0.92	1.12	0.85	0.72	1.03	1.06	1.357	0.51	0.963	0.937	-1.38812	0	0.89971	4e-05	0.86211	8e-05
LOC9271666	6.47	6.2	6.28	6.92	6.06	6.12	7.07	6.48	6.38	3.96	3.95	4.12	6.317	6.367	6.643	4.01	0.0356	0.74025	0.04806	0.67668	-0.68255	0
LOC4331076	5.62	6.32	5.98	23.73	38.97	31.61	8.94	7.77	9.65	28.11	32.14	32	5.973	31.437	8.787	30.75	2.41912	0	-1.84715	0	-0.04347	0.41415
LOC4327895	22.99	25.57	23.19	35.96	39.52	45.84	38.99	40.08	40.26	56.61	60.02	61.03	23.917	40.44	39.777	59.22	0.79888	0	-0.04454	0.44925	0.52497	0
LOC4330176	0.12	0.12	0.12	0.23	0.49	0.32	0.36	0.36	0.47	0.56	0.65	0.67	0.12	0.347	0.397	0.627	1.58916	0.00068	0.17725	0.66601	0.85088	0.00677
LOC4348674	0	0	0.04	0	0	0.04	0.04	0	0	0	0	0	0.013	0.013	0.013	0	0.04484	0.98677	-0.0154	0.99773	NA	NA
LOC4335039	3.28	3.57	3.83	3.68	2.98	4.01	4.12	4.82	4.05	1.79	1.11	1.43	3.56	3.557	4.33	1.443	0.02437	0.86507	0.26895	0.03399	-1.31623	0
LOC4333145	13.6	13.89	13.35	18.15	29.78	21.65	17.23	20.07	18.12	28.58	31.53	28.75	13.613	23.193	18.473	29.62	0.76459	0	-0.32717	0	0.353	0
LOC4351044	0.36	0.46	0.3	2.83	3.35	1.94	1.72	1.9	1.7	3.51	3.1	2.97	0.373	2.707	1.773	3.193	2.87773	0	-0.61125	0	0.23473	0.02469
LOC9266587	3.11	2.58	2.76	5.07	4.49	4.46	3.81	5.11	4.12	6.9	7.78	6.7	2.817	4.673	4.347	7.127	0.74626	0	-0.11343	0.26554	0.59809	0
LOC4340442	6.49	5.88	6.25	9.12	10.23	7.81	8.7	7.83	8.98	10.56	10.15	9.8	6.207	9.053	8.503	10.17	0.55577	0	-0.09504	0.12292	0.16193	0.00351
LOC4338364	0.49	0.34	0.37	1.07	1.08	0.78	0.52	0.69	0.63	1.74	2.15	1.81	0.4	0.977	0.613	1.9	1.29431	0	-0.67013	2e-05	0.95203	0
LOC107278194	0.07	0	0	0.07	0.19	0.07	0	0.04	0.04	0	0	0	0.023	0.11	0.027	0	2.21476	0.03422	-2.18532	0.04434	-4.18976	0.00467
LOC4330988	0	0	0.09	0	0.04	0.26	0.04	0.26	0.17	0.04	0.04	0.04	0.03	0.1	0.157	0.04	1.85219	0.09998	0.63668	0.43374	-1.24223	0.2405
LOC4337077	8.6	10.54	6.22	14.93	17.04	15.2	8.75	7.44	7.28	11.81	8.42	14.54	8.453	15.723	7.823	11.59	0.8998	0	-1.00577	0	-0.43552	0
LOC4341471	6.43	6.35	4.64	15.71	32.03	31.35	19.22	28.1	18.46	12.29	9.86	13.29	5.807	26.363	21.927	11.813	2.23119	0	-0.28991	0.00013	-1.18406	0
LOC4346662	3.16	1.85	2.91	3.55	5.43	4.58	3.89	4.64	4.07	4.74	4.68	4.73	2.64	4.52	4.2	4.717	0.78842	0	-0.11093	0.33623	0.05416	0.63066
LOC4345149	33.68	35.94	32.43	27.91	37.66	33.98	39.82	30.29	35.99	32.08	32.68	32.88	34.017	33.183	35.367	32.547	-0.15249	0.00465	0.1576	0.00456	-0.07729	0.19402
LOC107281290	0	0	0	0	0	0	0	0	0	0	0.03	0	0	0	0	0.01	NA	NA	NA	NA	NA	NA
LOC4330271	84.77	77.57	85.71	70.24	63.07	64.34	95.74	75.56	94.43	60.8	60.07	55.52	82.683	65.883	88.577	58.797	-0.28228	0	0.40569	0	-0.19193	1e-05
LOC107275725	0	0	0	0	0.17	0	0	0	0	0	0.17	0	0	0.057	0	0.057	NA	NA	NA	NA	-0.01984	0.99567
LOC4336627	303.67	316.44	322.06	492.35	285.68	395.96	175.34	271.05	252.7	289.48	347.76	345.6	314.057	391.33	233.03	327.613	0.36334	0	-0.7745	0	-0.28656	0
LOC4328033	1.81	1.15	0.59	7.23	7.43	8.29	4.06	6.34	4.77	6.57	6.74	5.97	1.183	7.65	5.057	6.427	2.7098	0	-0.60636	0	-0.26266	0.00161
LOC9266485	36.88	35.35	28.52	52.86	56.84	49.93	39.18	45.82	37.85	72.81	50.66	64.85	33.583	53.21	40.95	62.773	0.72159	0	-0.40512	0	0.20728	7e-05
LOC4344902	4.95	6.72	4.64	10.07	5.13	8.84	1.92	1.66	1.51	3.32	4.01	5.75	5.437	8.013	1.697	4.36	0.58725	0	-2.25825	0	-0.89812	0
LOC107275703	0	0.03	0	0.03	0.03	0	0	0	0	0	0	0	0.01	0.02	0	0	1.04484	0.5885	NA	NA	NA	NA
LOC4344429	17.74	20.11	19.49	26.35	26.45	23.5	19.02	25.45	22.72	23.36	28	24.66	19.113	25.433	22.397	25.34	0.50815	0	-0.25923	0	-0.06546	0.07596
LOC107275263	11.41	11.29	11.81	10.7	10.18	7.72	8.14	10.81	11.12	7.52	8.67	7.53	11.503	9.533	10.023	7.907	-0.25255	1e-05	0.06352	0.33821	-0.28357	1e-05
LOC4328780	3.82	2.94	2.03	2.17	3.68	2.54	4.94	5.11	4.1	8.37	5.63	7.16	2.93	2.797	4.717	7.053	-0.04728	0.78153	0.74827	0	1.32724	0
LOC4335539	3.76	3.47	3.67	5.5	6.66	5.58	8.1	7.33	7.76	6.08	8.25	6.79	3.633	5.913	7.73	7.04	0.72291	0	0.37934	0	0.24673	0.0017
LOC4330044	85.25	92.43	87.19	59.23	107.55	80.39	57.9	52.68	60.51	74.52	56.8	72.34	88.29	82.39	57.03	67.887	-0.08572	0.00067	-0.53402	0	-0.2845	0
LOC107278772	0	0.07	0	0	0	0	0	0	0	0	0	0.04	0.023	0	0	0.013	NA	NA	NA	NA	NA	NA
LOC4337552	168.66	164.02	161.66	112.69	109.94	111.47	152.54	125.6	147.02	98.65	101.22	95.17	164.78	111.367	141.72	98.347	-0.5337	0	0.33282	0	-0.19868	0
LOC4326371	0	0.04	0	0	0	0	0	0	0	0	0	0	0.013	0	0	0	NA	NA	NA	NA	NA	NA
LOC9270089	0	0.04	0	0.35	0.68	0.2	0.51	0.86	0.34	0.52	0.46	0.73	0.013	0.41	0.57	0.57	4.99249	0	0.47196	0.20377	0.47467	0.18643
LOC4329292	0.28	0.19	0.18	0.33	0.46	0.45	0.42	0.4	0.56	0.55	0.82	0.37	0.217	0.413	0.46	0.58	0.94391	0.00156	0.17986	0.52868	0.48635	0.0445
LOC9268856	0.43	0.17	0.51	0.26	1.06	0.75	0.6	0.61	0.78	1.2	1.22	0.68	0.37	0.69	0.663	1.033	0.92936	0.07168	-0.0768	0.89238	0.56512	0.17221
LOC107275351	0	0	0	0	0	0.09	0	0.09	0	0	0	0	0	0.03	0.03	0	NA	NA	-0.0154	0.99773	NA	NA
LOC107278602	0.05	0.1	0.1	0.36	0.52	0.27	0.1	0.17	0.12	0.12	0.17	0.12	0.083	0.383	0.13	0.137	2.2775	0	-1.56999	0.00013	-1.48696	0.00021
LOC107280797	25.14	24.22	27.11	9.5	2.14	7.09	17.92	18.84	19.08	1.72	0.71	0.49	25.49	6.243	18.613	0.973	-1.95878	0	1.53351	0	-2.72757	0
LOC107278385	0.06	0.06	0.16	0.06	0.23	0.06	0.35	0.29	0.19	0.03	0.03	0.03	0.093	0.117	0.277	0.03	0.33434	0.64689	1.22561	0.0231	-1.89431	0.03826
LOC4334582	9.52	9.33	9.73	9.65	13.36	14.14	12.07	13.45	12.14	11.52	9.87	11.28	9.527	12.383	12.553	10.89	0.38905	0	0.01631	0.82147	-0.18976	0.00194
LOC4344860	4.27	4.38	4.71	9.1	8.7	7.01	4.01	6.62	5.89	14.07	18.56	15	4.453	8.27	5.507	15.877	0.90991	0	-0.59507	0	0.92979	0
LOC4331875	37.75	39.92	35.76	34.36	32.25	35.18	52.73	35.88	39.76	24.96	27.45	25.67	37.81	33.93	42.79	26.027	-0.11863	0.02465	0.31699	0	-0.40601	0
LOC4349774	130.8	133.29	135.1	135.1	76.05	104.33	83.58	99.74	106.49	93.06	115.61	112.14	133.063	105.16	96.603	106.937	-0.31737	0	-0.13574	0	0.00855	0.71107
LOC4339579	37	37.59	29.16	43.06	52.51	41.54	24.35	33.29	30.98	46.39	46.97	45.01	34.583	45.703	29.54	46.123	0.44275	0	-0.63616	0	-0.00258	0.92172
LOC4326643	47.01	53.84	51.27	45.54	47.96	50.16	54.19	52.04	52.92	46.66	44.87	46.52	50.707	47.887	53.05	46.017	-0.0561	0.15223	0.13498	0.00042	-0.07333	0.07034
LOC112938812	1.84	1.62	2	1.97	1.76	1.44	2.35	1.87	1.95	2.96	2.23	2.55	1.82	1.723	2.057	2.58	-0.0595	0.74163	0.24764	0.15404	0.57112	0.00017
LOC107279238	0	0	0	0	0	0.05	0	0	0	0	0	0	0	0.017	0	0	NA	NA	NA	NA	NA	NA
LOC4328605	2.32	2.44	2.58	4.86	4.59	6.08	2.68	2.92	2.58	1.92	2.12	1.76	2.447	5.177	2.727	1.933	1.09618	0	-0.93209	0	-1.43152	0
LOC107277309	0.36	0.31	0.24	0.43	0.12	0.2	0.2	0.28	0.32	0.08	0.04	0.08	0.303	0.25	0.267	0.067	-0.2308	0.64674	0.0586	0.92954	-1.94584	0.00487
LOC4328492	364.12	398.9	382.89	308.52	278.32	282.57	385.31	304.68	300.14	209.77	198.21	202.29	381.97	289.803	330.043	203.423	-0.3151	0	0.15024	0	-0.56027	0
LOC4347242	42.45	42.12	38.71	296.96	246.48	249.45	47.19	49.61	60.24	259.76	372.94	304.16	41.093	264.297	52.347	312.287	2.72021	0	-2.35597	0	0.22194	0
LOC4344592	12.56	13.35	12.49	8.41	7.94	8.29	11.08	10.15	10.61	6.83	6.15	6.91	12.8	8.213	10.613	6.63	-0.62694	0	0.36281	0	-0.31686	0
LOC9267566	35.61	34.44	33.42	40	32.2	29.22	15.86	22.97	19.98	45.17	44.8	49.69	34.49	33.807	19.603	46.553	-0.00884	0.83325	-0.79692	0	0.44921	0
LOC4336704	9.63	8.08	7.62	7.94	6.63	7.78	8.99	11.23	11.69	8.56	9.97	8.06	8.443	7.45	10.637	8.863	-0.152	0.11743	0.49856	0	0.23194	0.01546
LOC4352588	1.4	1.43	1.19	3.32	4.09	3.56	2.95	2.91	3.03	1.95	1.5	1.16	1.34	3.657	2.963	1.537	1.46613	0	-0.31064	0.0193	-1.26426	0
LOC4346091	6.04	6.18	5.83	6.3	5.76	4.72	4.99	6.04	5.08	5.14	5.45	4.54	6.017	5.593	5.37	5.043	-0.09642	0.15173	-0.06327	0.40482	-0.15748	0.02502
LOC107276585	0.37	0.3	0.37	0.27	0.08	0.08	0.61	0.53	0.68	0.08	0	0.04	0.347	0.143	0.607	0.04	-1.59259	0.00284	2.39964	0	-2.18976	0.03961
LOC4341563	2.25	2.35	2.49	3.45	4.95	4	3.29	3.15	4.06	3.5	2.01	2.06	2.363	4.133	3.5	2.523	0.81919	0	-0.24432	0.02611	-0.71824	0
LOC4345561	1.01	1.45	1.85	1.41	0.46	1.7	3.06	5.41	4.14	3.75	4.89	5.13	1.437	1.19	4.203	4.59	-0.2372	0.29383	1.79663	0	1.92161	0
LOC4333287	1.61	1.67	1.4	1.86	3.59	3.2	2.77	2.36	2.81	2.44	1.91	2.26	1.56	2.883	2.647	2.203	0.87055	0	-0.11413	0.45707	-0.37441	0.00915
LOC4342160	29.79	28.79	31.23	24.27	36.93	28.87	36.73	29.37	28.62	29.47	27.42	24.02	29.937	30.023	31.573	26.97	0.01927	0.67709	0.06719	0.14018	-0.16269	0.00022
LOC4348576	20.62	18.26	18.18	15.4	17.49	19.29	21.28	25.95	26.97	14.12	15.3	16.26	19.02	17.393	24.733	15.227	-0.10516	0.08227	0.49658	0	-0.20593	0.00114
LOC4336621	23.82	23.17	22.43	22.23	14.97	13.09	12.62	15.8	17.89	15.77	18.63	18.36	23.14	16.763	15.437	17.587	-0.45973	0	-0.13007	0	0.06254	0.0096
LOC4333799	50.36	50.14	48.46	46.91	38.6	36.22	39.46	41.49	46.67	42.89	48	44.72	49.653	40.577	42.54	45.203	-0.25691	0	0.06538	0.00753	0.14327	0
LOC4351289	16.33	15.68	16.65	13.13	10.44	9.91	9.01	11.53	11.28	11.56	13.07	12.88	16.22	11.16	10.607	12.503	-0.49414	0	-0.04759	0.20609	0.08024	0.02001
LOC4337217	2.7	2.88	2.59	6.86	6	5.18	3.64	3.29	3.94	3.67	3.83	2.89	2.723	6.013	3.623	3.463	1.15206	0	-0.73679	0	-0.80456	0
LOC107276382	0.02	0.02	0	0	0.05	0	0	0.02	0	0.02	0	0.05	0.013	0.017	0.007	0.023	0.04484	0.98352	-1.0154	0.62983	0.56512	0.71412
LOC4339037	9.2	9.52	9.49	16.98	14.83	12.58	8.39	11.64	11.38	14.86	17.75	18.26	9.403	14.797	10.47	16.957	0.66205	0	-0.50289	0	0.1914	0
LOC9270336	16.88	15.42	15.97	15.45	12.15	13.01	11.13	12.51	10.07	9.69	9.3	9.05	16.09	13.537	11.237	9.347	-0.22068	0.0013	-0.28407	0.0002	-0.55275	0
LOC4329544	11.95	12.16	7.92	20.88	24.49	26.8	7.91	9.01	11.22	36.69	39.13	46.16	10.677	24.057	9.38	40.66	1.22069	0	-1.3828	0	0.7289	0
LOC4327652	29.3	31.35	28.4	41.74	52.69	49.55	56.27	49.43	50.21	55.31	46.54	50.55	29.683	47.993	51.97	50.8	0.7129	0	0.10941	0.00249	0.07379	0.04393
LOC4332552	15.74	16.66	17.27	11.17	17.53	15.44	13.97	11.65	11.89	17.15	14.89	14.11	16.557	14.713	12.503	15.383	-0.14549	0.04121	-0.24453	0.00154	0.05071	0.52362
LOC4349216	16.48	11.65	10	10.64	15.94	13.49	1.46	1.54	1.75	12.89	9.34	9.11	12.71	13.357	1.583	10.447	0.10314	0.25713	-3.08865	0	-0.36517	7e-05
LOC4332739	25.61	27.01	26.02	25.09	24.71	27.14	23.89	24.14	26.1	28.15	31.77	28.41	26.213	25.647	24.71	29.443	-0.00642	0.91469	-0.06596	0.24256	0.18518	0.00017
LOC4328458	35.9	38.24	39.37	46.13	38.01	38.01	38.44	51.17	50.14	31.84	32.66	33.49	37.837	40.717	46.583	32.663	0.12783	0.00055	0.18271	0	-0.33183	0
LOC4332855	0.05	0	0	0	0.11	0.08	0	0	0.03	0.03	0.05	0	0.017	0.063	0.01	0.027	1.85219	0.09998	-2.82275	0.03996	-1.24223	0.2405
LOC4341776	48.17	46.74	48.44	40.34	38.12	39.71	42.4	41.05	45.05	41.56	39.34	38.56	47.783	39.39	42.833	39.82	-0.25213	0	0.108	0.01159	-0.00067	0.99529
LOC4351131	1.1	1.01	1.27	4.24	6.53	8.96	1.68	2.72	2.82	3.59	5.05	3.95	1.127	6.577	2.407	4.197	2.57247	0	-1.46109	0	-0.66451	0
LOC4324079	0.64	0.62	0.34	0.72	0.87	0.86	0.61	1.3	0.52	0.78	0.75	0.68	0.533	0.817	0.81	0.737	0.61572	0.00113	-0.0154	0.95177	-0.15829	0.40898
LOC107281369	0	0.04	0.04	0	0	0	0	0	0	0	0	0	0.027	0	0	0	NA	NA	NA	NA	NA	NA
LOC112937841	0	0	0	0	0	0	0	0	0	0.14	0.28	0.07	0	0	0	0.163	NA	NA	NA	NA	3.78752	0.01726
LOC107280576	0.16	0	0.64	0.51	2.2	0.95	0.32	0	0.65	0.87	0.67	0.17	0.267	1.22	0.323	0.57	2.24027	0.00014	-1.92506	0.00084	-1.11397	0.02716
LOC4332643	0.09	0.09	0.09	0.18	0.31	0	0.09	0.19	0.09	0.26	0.38	0.37	0.09	0.163	0.123	0.337	1.04484	0.33602	-0.60036	0.59307	1.20255	0.10099
LOC4338877	3.87	3.31	3.41	4.14	5.22	3.15	2.57	2.9	3.45	7.3	8	7.52	3.53	4.17	2.973	7.607	0.27212	0.03889	-0.53247	0.00011	0.84721	0
LOC4335708	54.65	53.91	50.95	49.92	41.61	41.82	33.49	41.27	43.22	55.08	66.43	63.94	53.17	44.45	39.327	61.817	-0.18898	0	-0.17937	0	0.44372	0
LOC107278476	0.82	0.66	0.96	1.32	1.3	1.02	1.55	1.95	1.34	3.71	3.39	3.98	0.813	1.213	1.613	3.693	0.61515	0.07206	0.39226	0.20442	1.58462	0
LOC4338106	11.81	12.91	12.76	17.4	27.16	22.65	20.01	18.69	19.21	22.2	25.21	23.12	12.493	22.403	19.303	23.51	0.84657	0	-0.21469	0	0.06853	0.04222
LOC9270381	4.24	4.89	3.58	2.15	1.33	3.66	1.32	2.05	1.12	0.67	1.35	1.25	4.237	2.38	1.497	1.09	-0.8122	0	-0.68154	0	-1.13895	0
LOC4352120	1.59	0.92	1.51	8.3	3.62	6.37	2.44	4.34	2.91	3.71	4.56	4.79	1.34	6.097	3.23	4.353	2.23304	0	-0.94451	0	-0.51673	0.00021
LOC4344764	54.07	55.11	54.94	59.28	45.05	47.03	44.8	47.31	51.65	43.87	42.4	44.24	54.707	50.453	47.92	43.503	-0.08879	0.01485	-0.08896	0.02298	-0.23145	0
LOC4327963	0.85	0.68	0.34	0.42	0.93	0.72	0.99	0.73	0.47	0.64	0.73	0.47	0.623	0.69	0.73	0.613	0.17037	0.61525	0.07207	0.84909	-0.17854	0.61446
LOC4338988	9.32	12.77	9.22	19.45	28.86	25.4	19.05	18.26	20.48	24.18	20.09	18.43	10.437	24.57	19.263	20.9	1.26853	0	-0.36462	0	-0.25116	0.00016
LOC4329963	70.71	67.57	69.31	91.64	80.58	73.75	80.07	77.26	73.44	72.27	75.3	69.15	69.197	81.99	76.923	72.24	0.2727	0	-0.10588	0.00064	-0.20001	0
LOC4333117	0.41	0.26	0.35	1.24	0.96	0.61	0.61	0.61	0.82	1	1.42	1.69	0.34	0.937	0.68	1.37	1.42335	0	-0.64055	0.01293	0.54918	0.00751
LOC107277300	0.28	0.46	0.39	1.7	2.21	1.48	0.7	0.89	0.62	2.4	1.85	1.81	0.377	1.797	0.737	2.02	2.24715	0	-1.28926	0	0.16647	0.10955
LOC4352619	28.67	27.02	27.92	22.49	12.66	15.73	21.49	28.3	31.47	14.79	15.05	16.83	27.87	16.96	27.087	15.557	-0.69923	0	0.66392	0	-0.14466	0.00306
LOC4328400	0.1	0	0	0	0	0	0	0	0	0	0	0	0.033	0	0	0	NA	NA	NA	NA	NA	NA
LOC4338870	157.49	164.39	181.69	118.55	121.79	115.37	88.03	97.26	88.48	86.87	79.15	78.98	167.857	118.57	91.257	81.667	-0.45197	0	-0.372	0	-0.56724	0
LOC4331906	5.66	7.27	6.17	12.31	10.05	15.22	11.81	12.5	11.83	12.39	11.98	13.27	6.367	12.527	12.047	12.547	1.01446	0	-0.07813	0.42746	-0.0222	0.82564
LOC4334118	24.46	29.8	23.42	18.46	21.24	20.47	25.06	19.18	21.89	18.39	15.44	16.75	25.893	20.057	22.043	16.86	-0.33752	0	0.12236	0.07373	-0.26794	0.0001
LOC4338042	1.47	2.23	1.69	3.67	8.53	6.79	3.61	4.22	2.4	6.8	8.08	8.21	1.797	6.33	3.41	7.697	1.85219	0	-0.90764	0	0.26269	0.04945
LOC107276958	0	0.11	0	0	0	0	0	0	0	0	0	0	0.037	0	0	0	-3.54013	0.03045	NA	NA	NA	NA
LOC9268921	4.43	0.29	0	0	0	0	0	0.35	0.47	0	5.41	0	1.573	0	0.273	1.803	-7.32968	0	4.82154	0.00025	7.53045	0
LOC112937633	0	0	0	0	0.08	0.04	0	0	0	0.04	0	0	0	0.04	0	0.013	NA	NA	NA	NA	-1.6048	0.35916
LOC4346434	0	0.04	0	0.04	0	0.04	0	0	0	0	0.04	0	0.013	0.027	0	0.013	1.04484	0.5885	NA	NA	-1.01984	0.61245
LOC4348710	3.56	4.6	3.06	4.03	0.75	16.24	0.54	0.37	0.64	0.99	0.92	1.53	3.74	7.007	0.517	1.147	0.98546	0	-3.82275	0	-2.66673	0
LOC4338477	8.06	12.57	6.75	38.8	39.36	75.23	16.95	14.33	12.8	29.16	29.29	26.85	9.127	51.13	14.693	28.433	2.53396	0	-1.82549	0	-0.87867	0
LOC4325914	144.25	153.07	169.24	107.8	100.3	119.59	131.06	125.81	105.5	57.3	41.65	51.68	155.52	109.23	120.79	50.21	-0.46364	0	0.12157	0.00019	-1.14873	0
LOC4327381	0.37	0.12	0.22	1.06	1.82	1.79	1.11	0.98	0.69	1.2	1.11	0.81	0.237	1.557	0.927	1.04	2.72095	0	-0.75564	0.00018	-0.59015	0.00258
LOC9267029	1.46	1.27	1.34	4.06	2.65	2.38	0.84	2.06	2.13	5.91	6.63	6.14	1.357	3.03	1.677	6.227	1.18252	0	-0.85904	0	1.02334	0
LOC4341195	15.81	15	12.33	19.53	26.44	18.53	19.6	22.41	18.91	45.8	51.2	52.53	14.38	21.5	20.307	49.843	0.58306	0	-0.09895	0.08876	1.21188	0
LOC4346016	53.59	53.69	49.94	46.32	59.86	58.08	56.3	49.69	54.82	37.89	29.1	27.74	52.407	54.753	53.603	31.577	0.08895	0.01772	-0.0417	0.31159	-0.80885	0
LOC4339515	16.06	18.75	17.66	21.05	23.57	24.89	27.24	18.23	20.1	16.86	13.64	17	17.49	23.17	21.857	15.833	0.45142	0	-0.10456	0.19533	-0.57543	0
LOC4345373	3.15	3.53	2.87	5.38	6.3	6.83	7.29	4.26	4.38	5.77	5.45	5.74	3.183	6.17	5.31	5.653	1.00064	0	-0.23672	0.1356	-0.15414	0.32462
LOC4333272	12.18	9.4	11.45	11	12.72	10.61	19.13	14.13	16.39	15.5	14.62	13.96	11.01	11.443	16.55	14.693	0.08449	0.34744	0.52042	0	0.34426	1e-05
LOC107280305	0	0	0	0	0.04	0.03	0	0	0.03	0	0	0	0	0.023	0.01	0	NA	NA	-1.60036	0.37788	NA	NA
LOC4327091	6.32	5.47	4.89	5.8	10.62	9.28	6.33	5.86	6.44	16.51	15.17	14.88	5.56	8.567	6.21	15.52	0.65127	0	-0.47483	2e-05	0.84266	0
LOC4339042	32.91	31.5	32.1	24.74	20.92	21.35	20.19	23.41	23.94	22.27	22.1	22.59	32.17	22.337	22.513	22.32	-0.50902	0	0.0075	0.86522	-0.0066	0.87493
LOC4352203	9.4	11.56	7.73	37.72	52.76	49.33	20.39	22.83	15.18	35.39	36.41	39.27	9.563	46.603	19.467	37.023	2.30685	0	-1.26965	0	-0.34374	0
LOC4326075	22.16	20.56	20.53	19.07	23.1	19.12	20.82	20.91	23.65	23.52	24.29	22.41	21.083	20.43	21.793	23.407	-0.04034	0.2052	0.09212	0.00337	0.19362	0
LOC4348113	7.33	8.43	6.41	10.31	11.92	9.61	9.73	10.53	10	11.54	11.95	11.31	7.39	10.613	10.087	11.6	0.53374	0	-0.07755	0.26459	0.12082	0.05527
LOC4334253	13.06	12.81	12.47	15.01	25.93	28.16	21.75	17.35	13.26	17.17	14.35	12.47	12.78	23.033	17.453	14.663	0.88674	0	-0.41666	0	-0.67318	0
LOC4349655	2.24	1.97	2.6	3.44	3.48	4.29	1.82	2.45	2.42	2.8	2.56	2.97	2.27	3.737	2.23	2.777	0.77626	0.00047	-0.77724	0.00066	-0.46394	0.03371
LOC4331878	10.55	10.14	10.48	11.73	9.2	8.71	7.85	8.94	8.76	10.06	11.31	11.55	10.39	9.88	8.517	10.973	-0.06161	0.26485	-0.22592	6e-05	0.1416	0.00798
LOC107278409	2.59	2.44	3.22	3.37	1.74	2.24	2.3	2.49	2.41	3.05	3.75	3.42	2.75	2.45	2.4	3.407	-0.13938	0.18044	0.06577	0.58213	0.42625	1e-05
LOC107279231	0.07	0.1	0.1	0.05	0.07	0	0	0	0.07	0.07	0.07	0	0.09	0.04	0.023	0.047	-1.69728	0.01977	-2.26332	0.14548	-1.26777	0.3324
LOC4333230	21.38	19.2	19.9	19.99	19.34	19.53	18.65	19.19	21.42	19.44	18.72	17.69	20.16	19.62	19.753	18.617	-0.01727	0.7753	0.00136	0.99542	-0.09514	0.10695
LOC9268348	34.21	32.44	33.82	21.98	18.71	20.27	24.01	26.65	24.9	14.28	12.32	14.35	33.49	20.32	25.187	13.65	-0.7717	0	0.28554	0	-0.57833	0
LOC4340012	83.69	77.99	80.43	56.17	67.37	64.07	59.28	66.69	62.03	55.11	48.34	55	80.703	62.537	62.667	52.817	-0.34551	0	-0.00278	0.94453	-0.24821	0
LOC4339687	0	0	0.04	0	0	0	0	0	0	0	0	0	0.013	0	0	0	NA	NA	NA	NA	NA	NA
LOC4348225	51	51.69	52.05	58.07	51.32	51.35	52.71	54.21	58.03	58.38	65.42	63.42	51.58	53.58	54.983	62.407	0.03896	0.19335	0.02136	0.51926	0.23348	0
LOC9272469	8.56	8.31	9.15	10.88	11.15	10.71	9.42	8.74	9.38	9.38	10.2	9.62	8.673	10.913	9.18	9.733	0.32239	0	-0.24694	0	-0.17832	0.00022
LOC4340986	24.18	25.71	22.7	40.27	24.6	30.43	21.67	30.42	28.82	32.37	36.81	38.83	24.197	31.767	26.97	36.003	0.4187	0	-0.24638	0	0.16444	0
LOC4342552	6.58	4.16	4.41	1.73	4.63	1.45	0.14	0.66	0.36	9.33	9.34	8.9	5.05	2.603	0.387	9.19	-0.93307	0	-2.74611	0	1.81473	0
LOC4352638	1.35	1.61	1.29	1.92	2.53	2.76	2.36	2.68	2.76	2.46	1.86	1.96	1.417	2.403	2.6	2.093	0.75592	0	0.13334	0.39484	-0.21528	0.16794
LOC4342529	0.35	0	0.46	0.69	0.72	0.55	0.23	0	0	0.23	0.12	0.12	0.27	0.653	0.077	0.157	1.32495	0.04258	-3.10286	0.00053	-2.1073	0.00504
LOC4330221	8.28	8.19	9.1	22.03	4.13	10.24	8.71	13.65	12.14	24.63	21.56	24.32	8.523	12.133	11.5	23.503	0.53991	0	-0.12057	0.08561	0.92784	0
LOC107276650	0	0	0	0.05	0	0	0	0	0	0	0	0	0	0.017	0	0	NA	NA	NA	NA	NA	NA
LOC4349488	0	0	0	0	0.03	0	0	0	0	0.03	0.02	0.02	0	0.01	0	0.023	NA	NA	NA	NA	0.98016	0.48131
LOC4340572	44.11	45.88	46.74	48.63	59.5	56.55	80.05	55.73	74.32	60.25	47.76	56.89	45.577	54.893	70.033	54.967	0.29353	0	0.34071	0	-0.01181	0.77818
LOC4325007	2.41	3.01	3.25	3.44	2.81	2.46	1.18	1.32	1.16	1.51	1.43	1.62	2.89	2.903	1.22	1.52	0.02024	0.86487	-1.25802	0	-0.94053	0
LOC4340478	36.4	37.03	35.62	30.53	41.26	47.84	39.61	39.54	34.53	56.99	50.5	57.64	36.35	39.877	37.893	55.043	0.12973	3e-05	-0.08749	0.00657	0.45341	0
LOC4347898	0.07	0.04	0	0.04	0	0	0.04	0	0.04	0.41	0.3	0.26	0.037	0.013	0.027	0.323	-1.54013	0.36574	0.9846	0.63939	4.6806	0
LOC4334023	44.52	41.14	38.07	36.2	40.52	40.18	46.02	39.19	43.73	52.4	52.13	51.34	41.243	38.967	42.98	51.957	-0.05148	0.21055	0.13987	0.00045	0.39403	0
LOC4352741	17.32	17.33	17.14	24.75	25.19	26.47	22.49	24.81	20.83	34.39	36.84	36.96	17.263	25.47	22.71	36.063	0.56069	0	-0.16348	1e-05	0.49974	0
LOC107277224	0.35	0.26	0.26	1.11	1.25	1.68	0.69	0.7	0.78	0.35	0.53	0.43	0.29	1.347	0.723	0.437	2.2775	0	-0.92613	0.01405	-1.66754	5e-05
LOC107276955	0	0	0	0	0	0.02	0	0.02	0.02	0	0.02	0	0	0.007	0.013	0.007	NA	NA	0.9846	0.63939	-0.01984	0.99567
LOC4329087	3.2	2.69	3.12	2.6	4.6	4.36	2.74	2.31	2.65	4.34	3.25	4.95	3.003	3.853	2.567	4.18	0.37307	0.00208	-0.58991	0	0.11232	0.35513
LOC4337756	64.17	62.46	75.4	35.44	24.72	27.11	18.26	28.15	26.41	14.43	13.75	15.43	67.343	29.09	24.273	14.537	-1.02917	0	-0.25124	0	-1.08776	0
LOC4327543	0.77	1.29	0.83	3.54	5.27	2.08	0.83	1	0.46	21.41	26.61	19.76	0.963	3.63	0.763	22.593	1.94666	0	-2.25825	0	2.62158	0
LOC4338265	1.93	2.74	2.78	1.34	1.3	1.98	2.63	2.6	2.7	2.09	0.93	1.21	2.483	1.54	2.643	1.41	-0.66911	2e-05	0.76653	0	-0.13878	0.49428
LOC4334479	4.94	4.96	4.4	9.84	8.3	7.05	4.94	6.06	6.85	9.88	12.65	11.27	4.767	8.397	5.95	11.267	0.79908	0	-0.48195	0	0.43035	0
LOC4330780	1.73	2.58	1.91	37.42	21.97	27.41	29.43	21.44	20.51	14.72	18.27	12.43	2.073	28.933	23.793	15.14	3.83224	0	-0.30062	0	-0.9577	0
LOC4326946	4.21	4.77	3.49	5.5	11.29	9.11	4.68	4.21	3.32	1.64	1.41	1.43	4.157	8.633	4.07	1.493	1.07586	0	-1.09278	0	-2.54201	0
LOC9270263	0.12	0.09	0.16	0.14	0.15	0.44	0.15	0.26	0.31	0.12	0.17	0.23	0.123	0.243	0.24	0.173	0.98825	0.05228	-0.0154	0.98839	-0.49377	0.32106
LOC4346556	0	0.03	0	0	0	0	0	0	0	0	0	0	0.01	0	0	0	NA	NA	NA	NA	NA	NA
LOC107279888	0	0	0	0.16	0	0.05	0.05	0.11	0.11	0.05	0.17	0.11	0	0.07	0.09	0.11	NA	NA	0.30653	0.80346	0.56512	0.60163
LOC4333450	5.44	5.09	4.76	8.76	10.39	8.61	8.33	8.53	6.48	11.4	12.64	11.92	5.097	9.253	7.78	11.987	0.92252	0	-0.29984	0	0.30223	0
LOC4330631	42.07	41.21	42.01	52.21	40.49	47.91	46.85	47.27	49.11	35.37	36.17	36.97	41.763	46.87	47.743	36.17	0.20954	2e-05	0.00429	0.95167	-0.40077	0
LOC107281854	0.24	0.14	0.14	0.33	1.39	0.83	1.24	0.96	0.47	0.95	0.62	0.5	0.173	0.85	0.89	0.69	2.39847	0	0.2684	0.42701	-0.22255	0.53752
LOC9272128	0.72	0.72	0.66	0.9	0.97	1.03	0.75	0.75	0.83	1.07	1.41	1.01	0.7	0.967	0.777	1.163	0.51877	0.00144	-0.3194	0.05667	0.26112	0.07959
LOC4324220	74.99	60.77	70.37	46.21	44.14	47.88	72.7	72	55.51	16.73	15.95	14.77	68.71	46.077	66.737	15.817	-0.54983	0	0.50919	0	-1.53577	0
LOC4347812	0.4	0.45	0.42	0.46	0.46	0.44	0.52	0.66	0.52	0.6	0.84	0.69	0.423	0.453	0.567	0.71	0.11093	0.69852	0.3279	0.2208	0.65554	0.00519
LOC112939053	0	0	0.05	0	0	0	0	0	0	0	0	0	0.017	0	0	0	NA	NA	NA	NA	NA	NA
LOC4349159	25.59	22.51	24.13	22.96	24.96	23.28	31.67	29.27	26.34	24.93	23.42	22.93	24.077	23.733	29.093	23.76	-0.00143	0.98438	0.28462	0	-0.00959	0.86706
LOC4328255	34.13	35.19	38.73	55.07	57.1	61.63	94.74	90.96	86.06	39.74	43.39	41.2	36.017	57.933	90.587	41.443	0.70506	0	0.62616	0	-0.49486	0
LOC4334558	7.42	6.39	5.98	15.28	23.65	18.39	17.49	13.8	13.51	22.93	21.42	18.18	6.597	19.107	14.933	20.843	1.55903	0	-0.36428	0	0.11238	0.08579
LOC4336051	14.67	15.83	14.98	14.87	15.64	14.21	18.48	15.8	14.79	12.28	14.21	13.43	15.16	14.907	16.357	13.307	-0.09156	0.13263	0.17473	0.00375	-0.25489	5e-05
LOC4339881	52.1	50.71	48.58	34.38	36.36	47.31	47.57	44.63	37.78	38.11	34.32	41	50.463	39.35	43.327	37.81	-0.32766	0	0.12286	0.0066	-0.07602	0.10873
LOC4349789	8.97	9.18	13.26	14.67	1	8.74	11.25	11.76	16.77	1.85	1.91	2.25	10.47	8.137	13.26	2.003	-0.3232	8e-05	0.67648	0	-2.05226	0
LOC4351438	0	0	0	0	0.02	0	0.02	0.02	0.02	0	0.02	0	0	0.007	0.02	0.007	NA	NA	1.55507	0.39293	-0.00548	0.99806
LOC4339624	23	24.92	21.73	41.83	54.88	54.74	38.97	36.4	40.15	47.83	47.14	47.77	23.217	50.483	38.507	47.58	1.15897	0	-0.40839	0	-0.10797	0.02401
LOC4329894	0.14	0.3	0.14	0.2	0.04	0.41	0	0.03	0.07	0.14	0.45	0.1	0.193	0.217	0.033	0.23	0.2053	0.70781	-2.67836	0.00067	0.05416	0.93009
LOC4349141	3.25	3.37	3.73	2.44	2.18	3.58	2.9	2.84	3.07	1.83	1.94	1.76	3.45	2.733	2.937	1.843	-0.31925	0.00447	0.09412	0.48302	-0.57998	1e-05
LOC107275316	47.85	48.86	47.97	52.27	57.26	58.11	72.42	68.08	63.01	41.59	40.36	42.82	48.227	55.88	67.837	41.59	0.24788	0	0.25714	0	-0.44271	0
LOC4324418	6.03	6.09	6.22	8.16	9.15	8.93	8.23	8.79	8.11	10.33	10.75	10.02	6.113	8.747	8.377	10.367	0.53928	0	-0.07331	0.45883	0.23132	0.00572
LOC4339482	1.29	1.74	1.28	2.84	6.05	4.62	1.87	1.6	1.93	3.87	3.44	4.01	1.437	4.503	1.8	3.773	1.67459	0	-1.33104	0	-0.26659	0.08055
LOC4347451	152.54	146.67	149.02	94.48	133.56	131.01	144.52	145.86	122.89	124.77	94.76	118.66	149.41	119.683	137.757	112.73	-0.3016	0	0.19494	0	-0.09553	2e-05
LOC4336145	1090.49	1104.41	1062.14	553.6	308.63	418.66	548.21	639.16	672.27	408.47	368.29	480.78	1085.68	426.963	619.88	419.18	-1.31997	0	0.52223	0	-0.04366	0.00013
LOC4351373	17.56	18.33	17.97	34.24	29.08	22.31	11.69	15.81	14.19	23.87	27.13	23.46	17.953	28.543	13.897	24.82	0.69201	0	-1.03644	0	-0.2128	0
LOC107278163	0.13	0.13	0.2	1.24	0.48	1.17	1.19	0.4	0.46	1.79	1.14	1.25	0.153	0.963	0.683	1.393	2.69691	0	-0.52063	0.17046	0.49801	0.10371
LOC4352322	6.51	7.54	8.2	8.04	6.97	8.42	7.33	7.1	6.17	5.29	5.03	5.47	7.417	7.81	6.867	5.263	0.04484	0.61621	-0.16983	0.05903	-0.5885	0
LOC4324521	0.49	0.31	0.49	1.16	1.07	0.79	0.71	0.6	0.56	1.13	1.96	1.45	0.43	1.007	0.623	1.513	1.09546	5e-05	-0.65099	0.01374	0.6665	0.00109
LOC4331346	205.79	203.66	185.78	83.12	111.54	105.02	205.01	127.99	150.44	74.72	60.55	62.12	198.41	99.893	161.147	65.797	-0.93316	0	0.66664	0	-0.63489	0
LOC4325120	14.94	16.08	17.77	32.17	21.35	28.99	26.25	43.51	34.93	48.66	54.67	57.4	16.263	27.503	34.897	53.577	0.77934	0	0.33083	0	0.94758	0
LOC4328771	17.89	18.15	16.06	21.31	21.35	19.29	16.42	16.74	17.36	33.84	45.91	43.94	17.367	20.65	16.84	41.23	0.26396	0	-0.30034	0	0.98934	0
LOC4335929	2.17	1.84	1.27	4.02	3.85	3.46	4.31	4.7	3.59	7.02	6.69	5.68	1.76	3.777	4.2	6.463	1.11909	0	0.14431	0.2745	0.76178	0
LOC4329736	4.88	5.67	4.87	9.04	11.61	12.72	10.37	11.51	9.09	13.29	10.93	11.57	5.14	11.123	10.323	11.93	1.1305	0	-0.11814	0.1275	0.08947	0.22561
LOC4348952	16.18	15.38	17.52	14.96	20.94	20.75	26.69	23.22	23.35	18.94	16.02	16.53	16.36	18.883	24.42	17.163	0.22615	8e-05	0.36288	0	-0.1484	0.01135
LOC4325301	0.68	0.57	0.38	3.48	2.14	4.01	0.5	1.89	0.84	3.03	3.24	3	0.543	3.21	1.077	3.09	2.59012	0	-1.59462	0	-0.07252	0.63311
LOC4349897	0.7	0.33	2.97	0.26	0.5	0.26	0.15	0.07	0.22	24.27	49.24	18.77	1.333	0.34	0.147	30.76	-1.96846	0	-1.18532	0.02344	6.50082	0
LOC4331887	8.43	7.69	9.23	13.5	9.78	14.91	7.59	7.78	7.85	13.59	11.42	8.41	8.45	12.73	7.74	11.14	0.62181	0	-0.73466	0	-0.21401	0.00642
LOC4336633	1.14	1.03	0.79	1.61	2.16	1.56	0.73	1.46	1.04	3.64	4.98	3.99	0.987	1.777	1.077	4.203	0.88844	3e-05	-0.74504	0.00051	1.23676	0
LOC4338498	24.84	25.63	23.87	26.17	34.55	31.61	23.24	24.45	21.46	36.33	39.31	36.87	24.78	30.777	23.05	37.503	0.32818	0	-0.42244	0	0.27315	0
LOC4330592	2.97	2.78	3.52	2.95	3.85	3.62	4.88	4.28	4.12	5.62	5.1	5.52	3.09	3.473	4.427	5.413	0.19595	0.24627	0.33844	0.02962	0.62497	1e-05
LOC4338895	0.56	0.86	0.81	0.6	0.16	0.55	1.02	1.23	1.02	0.15	0.26	0.15	0.743	0.437	1.09	0.187	-0.71415	0.05486	1.28416	0.00014	-1.26085	0.01716
LOC4330080	0.12	0.06	0.12	0.23	0.72	0.46	0.41	0.35	0.35	0.35	0.12	0.12	0.1	0.47	0.37	0.197	2.30787	0.0003	-0.35243	0.50479	-1.28287	0.02044
LOC4326482	0	0	0	0	0.09	0.05	0.05	0	0	0	0	0.14	0	0.047	0.017	0.047	NA	NA	-1.60036	0.37788	-0.01984	0.99568
LOC4347169	2.95	3.26	3.16	2.81	1.91	2.37	3.03	3.14	3.04	3.81	4.37	3.24	3.123	2.363	3.07	3.807	-0.37923	0.00698	0.36479	0.0127	0.66997	0
LOC4346078	1.14	0.69	1.1	0.41	0.48	0.37	0.66	0.5	0.37	0.74	0.28	0.33	0.977	0.42	0.51	0.45	-1.24693	7e-05	0.33607	0.42431	0.07638	0.86965
LOC4346230	12.75	12.44	11.48	9.46	9.6	11.71	15.82	14.03	13.09	7.59	6.68	6.98	12.223	10.257	14.313	7.083	-0.22283	0.0031	0.46662	0	-0.555	0
LOC4332778	17.41	18.66	16.16	46.42	47.55	37.97	19.86	16.96	15.19	21.39	19.96	19.25	17.41	43.98	17.337	20.2	1.36372	0	-1.35514	0	-1.13799	0
LOC4325654	174.11	171.8	170.74	102.98	114.29	132.85	155.26	148.84	137.88	126.28	105.78	122.65	172.217	116.707	147.327	118.237	-0.54298	0	0.32711	0	0.00835	0.72317
LOC107277408	0.95	0.98	1.02	0.96	2.55	2.53	3.34	2.43	2	0.37	0.62	0.47	0.983	2.013	2.59	0.487	1.04692	0	0.36363	0.01634	-2.04656	0
LOC4338131	51.19	48.62	48.2	65.96	59.39	63.55	54.09	58.56	59.44	52.94	50.37	49.21	49.337	62.967	57.363	50.84	0.38206	0	-0.15137	1e-05	-0.32699	0
LOC4337863	26.36	25.91	28.1	37.85	49.33	40.12	32.13	35.65	31.65	41.15	40.54	38.98	26.79	42.433	33.143	40.223	0.63775	0	-0.3483	0	-0.0515	0.04967
LOC4341212	0.48	0.26	0.17	0.48	1.87	1.36	0.58	0.4	0.48	0.31	0.62	0.92	0.303	1.237	0.487	0.617	2.02756	0	-1.34604	0	-1.00256	0.00031
LOC4331519	0.3	0.53	0.35	1.94	4.24	2.93	0.59	0.9	1.13	5.54	6.08	5.26	0.393	3.037	0.873	5.627	2.97084	0	-1.80389	0	0.87689	0
LOC4331985	6.38	7.21	6.2	6.79	7.52	6.44	4.71	5.42	4.34	7.3	7.54	7.03	6.597	6.917	4.823	7.29	0.05927	0.49061	-0.51858	0	0.06	0.49134
LOC4334097	0.12	0	0	0	0	0.06	0	0	0	0	0	0	0.04	0.02	0	0	-0.95516	0.62045	NA	NA	NA	NA
BGIG39947_32172	0.74	0.8	0.51	0.42	0.87	0.9	1.2	0.36	0.29	1	0.62	0.42	0.683	0.73	0.617	0.68	0.11093	0.69852	-0.2486	0.41582	-0.10865	0.71663
LOC9266760	0	0	0	0	0	0	0	0.04	0	0	0	0	0	0	0.013	0	NA	NA	NA	NA	NA	NA
LOC107276219	0.34	0.28	0.24	0.08	0.06	0.04	0.06	0.1	0.14	0.04	0.04	0.02	0.287	0.06	0.1	0.033	-2.2115	0	0.72157	0.29682	-0.86784	0.32723
LOC4324161	1.15	1.55	0.28	3.32	3.83	4.09	0.96	1.3	1.35	3.76	2.13	2.89	0.993	3.747	1.203	2.927	1.92447	0	-1.64253	0	-0.36363	0.00039
LOC4330149	3.17	1.73	0.88	0.79	0.89	1.13	0.09	0.06	0.21	3.3	3.14	3.68	1.927	0.937	0.12	3.373	-1.02263	0	-2.98502	0	1.8392	0
LOC4331354	1.32	1.39	1.74	1.28	2.44	3.08	2.57	0.96	1.33	2.22	2.54	2.54	1.483	2.267	1.62	2.433	0.6298	0.00034	-0.49432	0.00574	0.08998	0.61119
LOC9266994	0	0	0	0.08	0.2	0.08	0.12	0	0.04	0.24	0.08	0.24	0	0.12	0.053	0.187	4.21476	0.00393	-1.18532	0.21162	0.61759	0.36881
LOC4339248	44.58	41.24	42.05	67.14	47.53	48.1	29.34	49.05	39.6	140.69	186.04	184.97	42.623	54.257	39.33	170.567	0.36829	0	-0.47254	0	1.63942	0
LOC4344882	0.08	0.13	0.07	0.25	0.55	0.29	0.26	0.14	0.22	0.36	0.36	0.39	0.093	0.363	0.207	0.37	1.93465	0	-0.81197	0.0108	0.02769	0.93615
LOC4348157	0.52	0.43	0.34	1.56	1.88	2.06	0.63	0.75	0.91	3.99	5.02	4.14	0.43	1.833	0.763	4.383	2.03601	0	-1.27666	0	1.26806	0
LOC107280889	0.66	0.64	0.49	0.67	1.61	1.16	0.77	0.74	0.96	1.69	1.55	1.51	0.597	1.147	0.823	1.583	1.01736	0	-0.52601	0.00139	0.45659	0.00084
LOC4329538	0.49	0.32	0.21	0.16	0.06	0.16	0.54	0.33	0.65	0	0	0	0.34	0.127	0.507	0	-1.39574	0.02758	1.9846	0.0006	-3.82719	0.01607
LOC4340491	0.28	0.44	0.59	0.67	0.76	0.55	0.26	0.37	0.52	1.08	1.45	0.73	0.437	0.66	0.383	1.087	0.60123	0.02799	-0.78478	0.0067	0.70554	0.00123
LOC4343030	21.94	20.4	22.9	23.54	22.84	20.37	22.39	27.58	24.31	25.95	25.58	22.8	21.747	22.25	24.76	24.777	0.06212	0.32495	0.13969	0.02159	0.13731	0.02153
LOC4343238	10.86	11.23	9.13	12.66	15.87	15.61	18.06	14.39	12.79	17.08	17.65	18.82	10.407	14.713	15.08	17.85	0.55573	0	0.0076	0.95494	0.24534	0.00484
LOC4344208	0	0	0	0	0	0	0	0	0	0	0.05	0	0	0	0	0.017	NA	NA	NA	NA	NA	NA
LOC4328284	24.44	22.7	21.84	26.34	26.49	21.32	24.38	26.88	30.28	31.09	33.17	29.89	22.993	24.717	27.18	31.383	0.12148	2e-05	0.13173	0	0.33379	0
LOC4331872	0.51	0.63	0.37	0.37	0.38	0.37	0.18	0.55	0.46	0.42	0.22	0.37	0.503	0.373	0.397	0.337	-0.41459	0.32474	0.10008	0.8512	-0.14537	0.77586
LOC4347731	78.69	94.24	83.74	56.49	60.19	72.6	79.22	65.64	66.81	47.35	39.24	44.92	85.557	63.093	70.557	43.837	-0.38368	0	0.134	0.00498	-0.55896	0
LOC4335588	0	0	0.09	0	0	0	0	0	0	0	0.03	0	0.03	0	0	0.01	NA	NA	NA	NA	NA	NA
LOC4341201	1.24	1.38	1.85	3.08	4.2	3.29	1.8	1.4	1.79	5.44	4.33	3.49	1.49	3.523	1.663	4.42	1.26219	0	-1.08781	0	0.31615	0.00886
LOC4341033	12.7	14.72	14.04	25.94	29.24	25.32	21.39	24.84	23.71	31.25	34.31	32.41	13.82	26.833	23.313	32.657	0.98906	0	-0.19466	0	0.27572	0
LOC4336214	4.33	5.37	3.99	5.95	6.86	6.9	3.83	5.82	6.1	7.81	6.75	6.03	4.563	6.57	5.25	6.863	0.51938	0	-0.32102	0.00029	0.07532	0.39423
LOC107276516	0	0	0	0.02	0	0.02	0	0	0.02	0.12	0.04	0.08	0	0.013	0.007	0.08	NA	NA	-1.0154	0.62983	2.56512	0.00873
LOC4339803	60.89	62.12	60.58	50.71	62.2	53.77	51.37	48.58	48.42	53.23	48.63	49.67	61.197	55.56	49.457	50.51	-0.26425	0	-0.16882	0	-0.08979	0.00267
LOC4346210	0.32	0.31	0.52	0.85	0.52	0.51	0.08	0.31	0.17	0.28	0.33	0.34	0.383	0.627	0.187	0.317	0.70866	0.00039	-1.76263	0	-0.98946	0
LOC107281709	0.06	0.18	0.18	0.23	0.24	0.35	0.12	0.24	0.06	0.06	0.48	0.53	0.14	0.273	0.14	0.357	1.04484	0.13264	-1.0154	0.16594	0.34273	0.56547
LOC4336527	12.84	12	11.6	16.21	21.5	20.79	18.55	17.67	18.01	23.51	25.05	23.29	12.147	19.5	18.077	23.95	0.69504	0	-0.11404	0.0176	0.28967	0
LOC4339356	1.49	1.08	1.55	2.57	3.1	2.63	2.62	1.54	1.9	3.04	2.72	1.8	1.373	2.767	2.02	2.52	1.02847	0	-0.46186	0.00142	-0.14587	0.31154
LOC4342322	0	0	0	0.1	0.26	0.13	0	0.01	0.05	0.31	0.38	0.48	0	0.163	0.02	0.39	6.25429	0	-2.90292	0	1.26256	1e-05
LOC107276439	0.05	0.05	0.05	0	0	0.1	0.05	0	0	0.1	0	0	0.05	0.033	0.017	0.033	-0.54013	0.71523	-1.0154	0.62983	-0.01984	0.99628
LOC4348867	34.18	33.46	33.38	32.82	37.36	34.38	33.55	30.71	31.72	36.92	39.93	36.81	33.673	34.853	31.993	37.887	0.11536	0.0008	-0.12031	0.00067	0.25567	0
LOC4348805	8.58	8.2	8.37	13.83	12.86	10.33	8.52	11.25	10.62	13.61	16.76	15.2	8.383	12.34	10.13	15.19	0.57242	0	-0.27751	0	0.29187	0
LOC4338510	0	0	0	0.06	0	0	0	0	0	0.06	0	0	0	0.02	0	0.02	NA	NA	NA	NA	-0.01984	0.99567
LOC4328443	0	0	0	0	0	0.04	0	0	0	0	0	0	0	0.013	0	0	NA	NA	NA	NA	NA	NA
LOC107275782	0.02	0.03	0.03	0	0	0	0	0	0.03	0	0	0	0.027	0	0.01	0	NA	NA	NA	NA	NA	NA
LOC4337511	20.48	22.28	22.18	16.01	17.77	17.06	20.83	19.11	22.52	17.16	15.41	14.84	21.647	16.947	20.82	15.803	-0.16996	0.00049	0.13815	0.00692	0.04882	0.3702
LOC4332762	31.76	32.94	32.27	24.54	14.24	13.95	15.27	18.18	22.81	16.47	19.32	18.65	32.323	17.577	18.753	18.147	-0.86393	0	0.0844	0.02553	0.03447	0.38332
LOC9268955	1.09	0.95	1.33	2.86	4.16	4.08	13.72	14.15	11.05	1.67	2.36	2.88	1.123	3.7	12.973	2.303	1.4151	0	1.98976	0	-0.40623	0.00092
LOC4346874	4.84	5.52	4.95	8.48	8.06	7.03	6.83	7.7	8.06	6.66	6.36	6.5	5.103	7.857	7.53	6.507	0.6345	0	-0.06727	0.35848	-0.27912	4e-05
LOC4334198	2.15	2.14	2.1	2.37	3.89	2.99	2.73	2.94	2.44	2.55	1.76	2.38	2.13	3.083	2.703	2.23	0.55414	0.00082	-0.19646	0.25613	-0.47742	0.00428
LOC4324167	0.09	0.09	0.15	0.3	0.13	0.46	0.12	0.25	0.09	0.52	0.95	1.03	0.11	0.297	0.153	0.833	1.44339	0.00417	-0.96649	0.04904	1.47973	0
LOC107275694	8.46	10.68	8.47	10.97	4.76	7.44	8.33	5.82	9.2	0.17	0.04	0.16	9.203	7.723	7.783	0.123	-0.22121	0.0105	-0.00766	0.9548	-5.97403	0
LOC4336800	1.69	2.48	1.65	3.34	5.72	3.96	3.88	4.01	4.13	4.45	2.89	3.64	1.94	4.34	4.007	3.66	1.17299	0	-0.11622	0.33552	-0.25007	0.02774
LOC107278279	0.51	0.84	0.17	0.66	0.95	1.06	2.5	4.08	3.11	1.01	0.09	0.42	0.507	0.89	3.23	0.507	0.87491	0.04727	1.83009	0	-0.84991	0.05877
LOC4337986	0.03	0.05	0.18	0.08	0.2	0.11	0.33	0.18	0.08	0.05	0.05	0.1	0.087	0.13	0.197	0.067	0.57291	0.3434	0.61201	0.23593	-0.88802	0.1678
LOC4325559	26.38	38.17	19.97	104.46	116.21	122.33	11.78	11.33	9.98	31.02	29.71	22.46	28.173	114.333	11.03	27.73	2.05196	0	-3.3889	0	-2.06358	0
LOC4346252	115.95	114.29	117.99	83.53	80.78	80.42	96.23	92.55	99.06	87.08	89.61	86.01	116.077	81.577	95.947	87.567	-0.48783	0	0.22353	0	0.08927	0.00023
LOC4343873	35.9	35.11	31.03	63.45	73.98	73.01	55.62	51.11	42.56	105.89	121.21	109.59	34.013	70.147	49.763	112.23	1.06614	0	-0.50572	0	0.66502	0
LOC4344340	0.47	0.93	0.61	1.4	0.49	1.96	3.36	2.82	3.12	3.42	4.18	3.46	0.67	1.283	3.1	3.687	0.9654	6e-05	1.25104	0	1.50017	0
LOC4329116	36.13	36.14	35.61	25.63	18.67	23.42	29.95	24.77	26.86	19.52	17.35	18.94	35.96	22.573	27.193	18.603	-0.66905	0	0.26989	0	-0.27956	0
LOC4336981	49.62	53	46.39	55.38	42.09	52.94	47.08	54.46	61.47	55.24	58.87	52.57	49.67	50.137	54.337	55.56	0.09674	0.01377	0.10827	0.00545	0.06751	0.08861
LOC4337389	102.12	91.21	90.83	75.22	89.95	78.59	111.88	94.69	98.08	80.65	80.14	78.04	94.72	81.253	101.55	79.61	-0.21123	0	0.31754	0	-0.03484	0.09556
LOC9266525	1.93	1.18	1.21	0.8	1.66	1.64	1.33	1.48	1.17	2.28	2.22	2.37	1.44	1.367	1.327	2.29	-0.05975	0.76392	-0.07068	0.75316	0.75143	0
LOC4334431	3.46	3.83	3.49	2.08	1.64	3.08	6.81	7.39	6.41	0.57	0.75	0.56	3.593	2.267	6.87	0.627	-0.6257	0.00027	1.57756	0	-1.88233	0
LOC9267107	1.79	3.34	2.7	4.24	4.11	4.67	5.24	3.77	3.94	5.12	5.34	4.98	2.61	4.34	4.317	5.147	0.74116	0	-0.0499	0.75052	0.23128	0.07222
LOC4334017	1.35	1.69	2.16	4.64	1.99	5.29	4.86	6.37	4	4.08	5.66	6.11	1.733	3.973	5.077	5.283	1.27678	0	0.30367	0.16154	0.35537	0.08508
LOC107278431	0	0	0	0	0	0	0.11	0	0	0	0.45	0.33	0	0	0.037	0.26	NA	NA	NA	NA	3.78752	0.01726
LOC4335887	36.43	36.94	34.73	33.96	29.21	32.99	34.72	41.43	40.87	29.6	32.46	30.34	36.033	32.053	39.007	30.8	-0.15455	0	0.27577	0	-0.06709	0.05005
LOC4348163	9.74	10.64	8.62	16.93	17.95	14.26	9.52	11.27	11.49	19.47	18.78	20.48	9.667	16.38	10.76	19.577	0.75088	0	-0.57919	0	0.25992	0
LOC4348643	9.34	6.95	6.77	12.37	9.37	9.51	8.9	9.28	9.47	7.96	9.58	9.51	7.687	10.417	9.217	9.017	0.46707	0	-0.19153	0.03084	-0.22546	0.00931
LOC4350800	2.61	1.68	1.4	1.57	1.58	1.79	2.14	1.91	2.71	2.05	2.17	1.15	1.897	1.647	2.253	1.79	-0.18587	0.25096	0.44479	0.00373	0.10778	0.54019
LOC4349765	21.94	22.81	24.15	21.17	14.51	15.76	11.39	19.63	17.43	16.08	16.29	15.36	22.967	17.147	16.15	15.91	-0.38792	0	-0.10554	0.20305	-0.13101	0.09952
LOC107281820	4.71	6.25	6.15	2.98	1.38	3.5	10.21	9.31	9.14	0.67	0.93	0.83	5.703	2.62	9.553	0.81	-1.06479	0	1.8326	0	-1.73171	0
LOC4338014	55.37	60.67	59.26	134.38	139.9	217.29	142.39	113.43	125.27	193.9	159.38	182.73	58.433	163.857	127.03	178.67	1.56121	0	-0.40543	0	0.07854	0.01662
LOC4330351	13.81	12.48	12.26	16.9	16.22	16.69	19.02	20.89	20.08	14.31	15.43	13.46	12.85	16.603	19.997	14.4	0.38535	0	0.26054	0	-0.21563	3e-05
LOC4325412	8.43	8.7	8.74	13.04	15.23	13	12.1	11.65	11.28	13.65	13.5	13.06	8.623	13.757	11.677	13.403	0.68583	0	-0.24169	1e-05	-0.04428	0.43922
LOC107281894	0.13	0.11	0.2	0.3	0.26	0.2	0.27	0.31	0.29	0.33	0.42	0.29	0.147	0.253	0.29	0.347	0.85219	0.02556	0.17725	0.63488	0.42073	0.19095
LOC4324710	66.32	68.29	67.25	75.73	55.05	57.43	47.36	70.3	69.95	62.92	71.68	66.38	67.287	62.737	62.537	66.993	-0.08615	7e-05	-0.01365	0.6023	0.0834	0.00015
LOC9269000	1.14	0.96	0.68	0.68	0.71	0.79	0.63	0.52	0.68	0.29	0.64	0.4	0.927	0.727	0.61	0.443	-0.32195	0.34418	-0.26332	0.52602	-0.7442	0.06659
LOC4344733	0.45	0.44	0.7	0.44	0.86	0.19	0	0.06	0	6.38	10.85	6.08	0.53	0.497	0.02	7.77	-0.07546	0.87917	-4.53896	0	3.96439	0
LOC4348153	34.63	34.86	34.32	42.87	28.57	27.31	27.38	31.89	34.65	30.92	33.08	33.35	34.603	32.917	31.307	32.45	-0.05759	0.03495	-0.07948	0.0054	-0.03238	0.27118
LOC4345082	10.8	10.43	10.39	9.66	12.17	10.23	6.03	10.5	8.9	10.5	13.68	13.49	10.54	10.687	8.477	12.557	0.05204	0.32232	-0.33493	0	0.17759	0.00025
LOC4351624	12.07	12.16	11.6	15.07	12.1	12.8	12.01	17.23	14.54	17.25	17.06	18	11.943	13.323	14.593	17.437	0.18006	0.00157	0.12364	0.03011	0.37092	0
LOC107277105	0.45	0.19	0.51	0.57	2.04	1.88	4.13	2.38	2.99	1.21	1.23	1.45	0.383	1.497	3.167	1.297	2.0042	0	1.07449	0	-0.21838	0.44887
LOC4344811	2.15	1.06	1.06	7.13	0.33	7.14	0.94	0.54	2.13	2.54	4.22	1.48	1.423	4.867	1.203	2.747	1.86246	0	-2.06749	0	-0.8926	2e-05
LOC112938674	0.06	0	0.04	0.04	0.2	0.15	0.17	0.04	0.02	0.1	0.04	0.11	0.033	0.13	0.077	0.083	2.04484	0.00233	-0.75236	0.20217	-0.64133	0.25679
LOC4324322	0.1	0.05	0.03	0.05	0.19	0	0.13	0.08	0.05	0.08	0.13	0.08	0.06	0.08	0.087	0.097	0.41876	0.60567	0.13771	0.87445	0.2639	0.72968
LOC4327117	157.37	154.83	150.08	193.16	158.11	138.41	150.51	171.86	191.33	186.86	235.13	200.14	154.093	163.227	171.233	207.377	0.10035	0	0.06039	0.00017	0.33382	0
LOC4343549	31.17	30.19	29.66	47.24	61.36	49.11	29.8	35.88	30.9	54.81	54.12	53.86	30.34	52.57	32.193	54.263	0.79865	0	-0.71229	0	0.04819	0.06025
LOC4342467	10.31	9.57	9.48	10.19	10.4	9.4	9.32	9.58	9.29	13.49	15.56	14.07	9.787	9.997	9.397	14.373	0.03703	0.50717	-0.09224	0.10334	0.52214	0
LOC4336075	12.7	12.6	13.96	5.75	7.01	7.97	10.48	8.97	9.93	2.07	3.08	2.39	13.087	6.91	9.793	2.513	-0.88423	0	0.48528	1e-05	-1.48154	0
LOC4327428	16.94	14.65	16.24	21.03	19.9	19.06	22.18	17.96	19.45	25.17	26.72	25.83	15.943	19.997	19.863	25.907	0.32907	0	-0.04011	0.61372	0.3539	0
LOC4338552	9.68	11.1	9.91	24.62	30.85	28.71	30.45	30.23	29.67	31.16	30.51	31.87	10.23	28.06	30.117	31.18	1.46432	0	0.08739	0.08249	0.12972	0.00652
LOC112939686	2.23	1.93	1.18	3.44	2.71	3.11	3.63	3.22	3.28	3.92	5.44	3.55	1.78	3.087	3.377	4.303	0.82272	0	0.11484	0.50289	0.45946	0.00119
LOC9270671	0.26	0.24	0.24	0.85	0.74	0.44	0.35	0.4	0.4	0.72	0.99	0.53	0.247	0.677	0.383	0.747	1.45722	0	-0.801	1e-05	0.1598	0.33421
LOC4324327	45.03	47.16	47.02	42.46	52.12	48.63	54.46	56.67	55.75	55.25	53.98	49.77	46.403	47.737	55.627	53	0.05252	0.06898	0.21613	0	0.1442	0
LOC4332952	0.03	0	0	0.03	0.03	0.03	0.03	0.03	0	0	0.06	0.06	0.01	0.03	0.02	0.04	1.6298	0.33725	-0.60036	0.71157	0.3952	0.76376
LOC4326346	31.27	28.37	27.3	27.21	27.37	24.39	25.58	28.63	34.81	33.5	41.12	36.03	28.98	26.323	29.673	36.883	-0.1305	0	0.16992	0	0.48157	0
LOC4335345	2.52	2.95	3.18	1.37	0.63	0.97	2.2	3.46	3.33	0.29	0.23	0.26	2.883	0.99	2.997	0.26	-1.51906	0	1.58516	0	-1.95844	0
LOC4335202	0.45	0.28	0.34	1.41	3.7	1.91	1.25	0.86	0.85	4.67	3.86	4.74	0.357	2.34	0.987	4.423	2.72765	0	-1.2457	0	0.91361	0
LOC4334169	657.52	647.07	698.94	335.29	230.84	348.46	422.87	448.49	455.7	242.32	207	237.4	667.843	304.863	442.353	228.907	-1.1107	0	0.52497	0	-0.4271	0
LOC4347608	0.19	0.17	0.14	0.23	0.33	0.15	0.15	0	0.12	0.12	0.17	0.19	0.167	0.237	0.09	0.16	0.45987	0.34862	-1.43043	0.01292	-0.51734	0.3094
LOC4330466	0.41	0.19	0.28	0.6	0.65	0.42	0.36	0.31	0.52	0.67	1.23	0.8	0.293	0.557	0.397	0.9	0.92454	0.00031	-0.49457	0.0518	0.68542	0.00051
LOC112937323	0.1	0.08	0.1	0.14	0.07	0.08	0.04	0.08	0.08	0.06	0.1	0.13	0.093	0.097	0.067	0.097	0.05623	0.94309	-0.59595	0.45042	0.01996	0.98745
LOC4347929	1.39	1.9	1.98	6.81	4.62	6.53	2.95	4.55	4.86	8.27	9.96	10.51	1.757	5.987	4.12	9.58	1.79002	0	-0.54409	0	0.66548	0
LOC9268443	5.7	5.66	5.92	10.09	10.02	8.75	10.19	10.02	10.05	8.08	8.71	8.51	5.76	9.62	10.087	8.433	0.74368	0	0.06527	0.16248	-0.19266	2e-05
LOC4337620	45.41	45.13	47.85	59.28	68.65	58.67	62.26	59.17	56.5	40.61	36.46	38.41	46.13	62.2	59.31	38.493	0.44986	0	-0.07697	0.0068	-0.6935	0
LOC4332468	3.49	2.79	3.11	3.09	4.59	3.36	5.59	5.83	5.46	6.71	5.65	6.14	3.13	3.68	5.627	6.167	0.18882	0.02834	0.67573	0	0.51172	0
LOC4352755	0.09	0.02	0.02	0.07	0	0	0.02	0.12	0.12	0.07	0.05	0.02	0.043	0.023	0.087	0.047	-0.95516	0.38048	1.85907	0.04672	0.98016	0.38104
LOC4330901	30.68	29.46	28.45	38.25	33.94	30.37	29.33	31.88	31.69	39.18	40.41	36.3	29.53	34.187	30.967	38.63	0.22594	0	-0.15163	1e-05	0.16577	0
LOC4338418	0.15	0.17	0.06	0.23	0.43	0.14	0.26	0.37	0.31	0.35	0.35	0.23	0.127	0.267	0.313	0.31	1.04484	0.00931	0.24764	0.50167	0.2432	0.49222
LOC9270292	2.14	2.37	1.7	2.21	3.97	2.41	1.43	1.06	1.14	6.96	6.44	5.9	2.07	2.863	1.21	6.433	0.49055	0.0044	-1.2466	0	1.16099	0
LOC4340848	0.15	0.05	0.25	0.05	0.05	0.05	0.25	0.1	0	0.25	0	0.05	0.15	0.05	0.117	0.1	-1.54013	0.10717	1.20699	0.27084	0.98016	0.38104
LOC4333405	4.68	5.51	5.17	7.11	9.22	7.25	7.32	7.73	6.99	7.99	8.66	8.18	5.12	7.86	7.347	8.277	0.62903	0	-0.1016	0.18695	0.06881	0.355
LOC4335837	0	0.04	0	0	0.04	0.11	0	0.11	0.07	0.07	0	0.07	0.013	0.05	0.06	0.047	2.04484	0.18874	0.30653	0.80346	-0.01984	0.99468
LOC112937664	0.17	0.3	0.15	0.47	0.26	0.43	0.08	0.03	0.05	0.05	0.05	0.13	0.207	0.387	0.053	0.077	0.92454	0.01187	-2.954	0	-2.37348	0
LOC4338938	574.97	556.33	568.82	486.6	372.89	386.5	521.09	478.2	532.53	327.42	321.28	287.4	566.707	415.33	510.607	312.033	-0.39294	0	0.271	0	-0.4467	0
LOC4338565	1.22	1.3	1.54	2.6	4.42	3.11	2.74	2.14	1.81	4	3.18	3.14	1.353	3.377	2.23	3.44	1.32254	0	-0.60317	5e-05	0.02439	0.8776
LOC4348892	0.37	0.4	0.47	0.23	0.53	0.54	0.82	0.38	0.57	0.24	0.31	0.2	0.413	0.433	0.59	0.25	0.08331	0.82892	0.43711	0.2097	-0.80833	0.04789
LOC4347428	7.16	6.64	6.64	18.13	16.61	14.93	12.84	13.68	11.68	19.34	16.29	15.65	6.813	16.557	12.733	17.093	1.29833	0	-0.38783	0	0.03484	0.54575
LOC4348531	3.39	3.19	4.08	4.22	2.8	8.72	2.85	2.91	2.72	0.74	0.33	0.33	3.553	5.247	2.827	0.467	0.62238	0.0002	-0.92881	0	-3.53229	0
LOC9266343	0.88	0.47	0.71	0.58	0.88	0.68	1.31	1.07	1.37	1.2	1.11	1.16	0.687	0.713	1.25	1.157	0.0683	0.82081	0.79859	0.00083	0.68418	0.00478
LOC4349611	0.6	0.6	0.42	0.67	1.16	1.43	1.04	0.85	0.93	3.11	2.76	3.01	0.54	1.087	0.94	2.96	1.04224	0.00122	-0.22129	0.49355	1.42521	0
LOC9270575	16.2	17.05	16.01	19.95	15.24	15.34	11.92	14.34	16.08	17.73	18.42	18.56	16.42	16.843	14.113	18.237	0.05135	0.25286	-0.26784	0	0.09972	0.02093
LOC4350205	1.31	1.22	1.26	2.32	2.42	2.5	2.72	1.82	2.34	2.06	1.62	1.76	1.263	2.413	2.293	1.813	0.95689	0	-0.0829	0.66606	-0.42666	0.01554
LOC4335176	0.43	0.3	0.49	2.33	1.73	1.49	0.75	0.9	0.76	8.65	14.43	12.43	0.407	1.85	0.803	11.837	2.1857	0	-1.20008	0	2.67586	0
LOC4325092	4.64	5.06	4.08	2.79	4.3	3.99	5.01	4.05	3.84	10	7.87	10.48	4.593	3.693	4.3	9.45	-0.29953	0.00782	0.21408	0.07826	1.34925	0
LOC9267048	0.45	0.43	0.43	0.94	0.51	0.8	0.2	0.46	0.36	0.38	0.56	0.27	0.437	0.75	0.34	0.403	0.78374	0.00287	-1.16006	5e-05	-0.81898	0.0023
LOC4350746	29.51	26.77	27.61	30.87	24.75	23.16	28.15	27.35	31.45	25.98	27.88	23.75	27.963	26.26	28.983	25.87	-0.07449	0.13198	0.13946	0.00457	-0.03566	0.5129
LOC4343734	3.98	3.92	3.82	4.57	5.29	4.9	3.64	4.43	4.08	6.42	7.14	6.45	3.907	4.92	4.05	6.67	0.34206	0.00045	-0.28565	0.00444	0.43278	0
LOC9270589	4.69	6.1	4.57	4.14	7.41	7.49	7.37	6.35	6.73	9.16	7.88	9.41	5.12	6.347	6.817	8.817	0.33231	0.00321	0.09414	0.42976	0.46244	0
LOC4347513	0.06	0	0	0.28	0.55	0.7	0.87	0.92	0.74	0.65	0.36	0.56	0.02	0.51	0.843	0.523	4.6298	0	0.77468	0.00493	0.06762	0.8502
LOC107281130	0.01	0.02	0.02	0.01	0.02	0.01	0.01	0.01	0.03	0.02	0.03	0.03	0.017	0.013	0.017	0.027	-0.39914	0.57039	0.42858	0.5717	1.08527	0.07209
LOC4336538	2.04	1.62	2.29	1.69	2.49	2.03	1.63	1.86	1.55	0.38	0.71	0.35	1.983	2.07	1.68	0.48	0.07272	0.64959	-0.3049	0.06263	-2.11249	0
LOC4324542	17.97	17.73	18.37	20.66	17.71	16.27	13.84	18.57	16.95	19.5	21.54	20.28	18.023	18.213	16.453	20.44	0.03092	0.53833	-0.15472	0.0016	0.15629	0.00062
LOC4342786	2.08	2.3	2.94	0.59	1.35	1.7	1.96	1.5	1.07	0.83	0.24	0.47	2.44	1.213	1.51	0.513	-0.97862	1e-05	0.30179	0.29023	-1.25014	0.00022
LOC4339433	8.8	8.11	9.95	4.05	1.99	2.7	3.13	2.97	3.15	1	0.71	0.66	8.953	2.913	3.083	0.79	-1.5758	0	0.04431	0.80246	-1.89657	0
LOC4349867	21.98	23.29	24.7	22.21	26.11	24.7	30.7	36.79	31.28	19.42	17.9	18.9	23.323	24.34	32.923	18.74	0.07538	0.07956	0.42982	0	-0.38465	0
LOC4329603	0.03	0.03	0	0	0.05	0.03	0.03	0	0.05	0.05	0.05	0.03	0.02	0.027	0.027	0.043	0.6298	0.66933	-0.0154	0.99947	0.71713	0.55141
LOC4338695	2.94	3.78	2.94	3.24	2.27	2.91	2.48	3.42	3.78	3.74	3.91	3.7	3.22	2.807	3.227	3.783	-0.1818	0.08669	0.19204	0.08311	0.41917	3e-05
LOC4346159	41.54	47.13	42.96	74.79	79.95	75.75	70.88	65.39	65.11	66.01	68.63	60.49	43.877	76.83	67.127	65.043	0.76925	0	-0.21687	0	-0.25678	0
LOC4332227	3.46	3.54	3.35	3.28	5.7	4.8	2.12	2.52	2.38	11.16	13.66	11.51	3.45	4.593	2.34	12.11	0.45116	0.00337	-0.9894	0	1.37871	0
LOC4337474	18.98	20.66	20.32	15.13	23.94	20.74	21.22	20.65	19.26	14.14	13.32	12.7	19.987	19.937	20.377	13.387	0.01422	0.81495	0.02465	0.70595	-0.58416	0
LOC107276268	0	0	0.04	0.12	0.08	0	0	0.04	0.12	0.04	0	0.04	0.013	0.067	0.053	0.027	2.36677	0.10436	-0.33733	0.78277	-1.34177	0.29606
LOC4330324	9.05	12.36	10.6	19.27	34.38	38.49	43.42	42.87	32.12	44.52	44.69	45.34	10.67	30.713	39.47	44.85	1.55054	0	0.35028	0	0.53172	0
LOC4333902	35.53	41.13	41.42	36.42	30.43	34.89	42.37	39.35	43.44	25.73	20.44	22.52	39.36	33.913	41.72	22.897	-0.19184	0	0.28606	0	-0.58202	0
LOC4346794	1.07	1.19	1.03	1.07	0.39	1.36	2.54	2.51	2.07	2.04	1.51	1.36	1.097	0.94	2.373	1.637	-0.18963	0.47297	1.31499	0	0.77534	0.0006
LOC4327329	6.05	5.85	5.83	5.5	7.49	7.13	7.67	7.7	6.63	8.25	6.93	6.95	5.91	6.707	7.333	7.377	0.1937	0.01173	0.12435	0.11032	0.1311	0.08229
LOC4348132	0.8	0.89	0.62	0.88	1.62	1.05	2.1	1.75	1.86	3.22	2.3	2.38	0.77	1.183	1.903	2.633	0.63964	0.0219	0.67824	0.00276	1.14291	0
LOC107275444	0.04	0	0	0.04	0	0.15	0.07	0	0.07	0	0.11	0.07	0.013	0.063	0.047	0.06	2.36677	0.10436	-0.33733	0.78277	-0.01984	0.99379
LOC4351389	11.31	10.87	10.39	12.64	15.8	12.55	13.13	13.56	13.7	14.71	15.39	14.07	10.857	13.663	13.463	14.723	0.34654	0	-0.0277	0.64442	0.10007	0.0529
LOC4334058	8.14	9.18	9.24	12.79	15.35	13.58	14.54	15.05	14.28	14.71	14.38	13.77	8.853	13.907	14.623	14.287	0.67117	0	0.05264	0.52679	0.02038	0.80885
LOC107276322	0.14	0.04	0.14	0	0	0	0	0	0	0	0	0.04	0.107	0	0	0.013	-4.12509	0.0048	NA	NA	NA	NA
LOC4345268	10.2	10.25	9.7	6.79	9.01	7.96	9.66	8.11	9.4	7.75	7.91	7.28	10.05	7.92	9.057	7.647	-0.33233	0	0.18893	0.00724	-0.05689	0.46628
LOC4330143	1.09	1.5	1.17	2.62	4.95	4.91	2.27	2.3	1.75	3.55	2.58	2.51	1.253	4.16	2.107	2.88	1.75908	0	-0.98818	0	-0.53933	0
LOC4347378	19.16	16.04	16.03	13.84	21.58	20.49	23.96	20.33	18.35	10.32	8.76	9.75	17.077	18.637	20.88	9.61	0.12971	0.00025	0.16353	0	-0.95581	0
LOC4352728	1.84	2.43	2.31	4.78	8.95	7.22	2.99	2.8	3.26	5.69	4.31	5.24	2.193	6.983	3.017	5.08	1.68694	0	-1.21647	0	-0.46602	0
LOC4340763	0	0.09	0.14	0	0.14	0	0	0.05	0.05	0.05	0.05	0	0.077	0.047	0.033	0.033	-0.69213	0.5521	-0.60036	0.71157	-0.6048	0.69423
LOC107281744	0.13	0.25	0	0.12	0.13	0.24	0.49	0.38	0	0	0	0.12	0.127	0.163	0.29	0.04	0.45987	0.71242	0.79196	0.45057	-2.01984	0.20524
LOC107276326	0.05	0.12	0.07	0.12	0	0.02	0.34	0.1	0.12	0	0.02	0.05	0.08	0.047	0.187	0.023	-0.69213	0.39102	1.9232	0.00248	-1.01984	0.36115
LOC4332079	6.59	6.81	8.11	9.71	8	10.53	19.14	27.47	20.79	8.14	9.01	7.59	7.17	9.413	22.467	8.247	0.41414	0	1.2428	0	-0.20512	0.00522
LOC4342153	0.06	0	0.07	0.02	0	0.02	0	0	0	0.03	0	0	0.043	0.013	0	0.01	-1.76186	0.04779	NA	NA	-0.54426	0.7145
LOC4344996	0	0.09	0	0.17	0.27	0.08	0	0	0	0	0	0	0.03	0.173	0	0	2.6298	0.05712	-3.60036	0.03359	-3.6048	0.02996
LOC4333279	0.02	0	0	0.02	0.05	0.02	0.31	0.14	0.19	0	0	0	0.007	0.03	0.213	0	2.04484	0.18874	2.73949	4e-05	NA	NA
LOC4336881	10.98	10.25	9.06	20.21	20.11	21.02	12.03	14.15	13.62	24.52	25.94	25.45	10.097	20.447	13.267	25.303	1.06341	0	-0.64628	0	0.28053	0.0001
LOC4336232	7.12	7.23	7.21	9.82	12.06	12.96	8.56	9.61	9.91	8.55	9.05	8.74	7.187	11.613	9.36	8.78	0.69565	0	-0.31348	0	-0.408	0
LOC4345633	4.04	4.21	4.35	4.63	4.04	4.17	1.43	1.44	1.38	3.49	3.47	4.46	4.2	4.28	1.417	3.807	0.05564	0.69467	-1.60575	0	-0.18506	0.1908
LOC107279024	0.12	0.07	0.08	0.27	0.33	0.2	0.16	0.08	0.12	0.61	0.61	0.5	0.09	0.267	0.12	0.573	1.55941	0.0122	-1.1674	0.05727	1.15009	0.00344
LOC4341560	4.71	4.72	4.51	11.61	11.26	13.37	8.41	10.74	9.43	12.67	14.1	11.19	4.647	12.08	9.527	12.653	1.40076	0	-0.3406	3e-05	0.05649	0.49746
LOC4351158	25.61	27.39	22.63	18.19	16.83	18.12	6.21	9.95	8.61	11.97	12.9	13.69	25.21	17.713	8.257	12.853	-0.50355	0	-1.10762	0	-0.37226	0
LOC4337958	662.01	597.99	663.71	430.29	351.52	340.11	410.52	495.96	469.98	349.66	316.96	351.83	641.237	373.973	458.82	339.483	-0.7675	0	0.28921	0	-0.14648	0
LOC9268459	399.49	382.58	404.26	344.97	374.7	370.18	649.47	423	457.26	272.43	238.77	223.6	395.443	363.283	509.91	244.933	-0.02348	0.40285	0.44807	0	-0.62718	0
LOC4344113	15.78	15.89	15.08	16.3	13.58	10.25	15.23	14.63	17.25	15.74	15.07	13.91	15.583	13.377	15.703	14.907	-0.2045	0.00038	0.22606	0.00012	0.14449	0.01629
LOC4326680	40.98	38.82	31.06	75.99	71.52	53.43	28.48	32.79	32.39	66.09	73.5	77.76	36.953	66.98	31.22	72.45	0.86883	0	-1.10655	0	0.10692	0
LOC4334962	0.04	0.04	0.06	0.1	0.23	0.1	0.18	0.04	0.12	0.3	0.26	0.44	0.047	0.143	0.113	0.333	1.6298	0.00786	-0.32025	0.57369	1.2317	0.00107
LOC9267815	45.17	43.65	43.95	25.91	23.18	27.55	35.92	26.15	29.98	23.99	24.71	20.94	44.257	25.547	30.683	23.213	-0.72253	0	0.23159	0.00494	-0.18227	0.03958
LOC107276889	0	0	0	0	0	0	0	0	0.05	0	0.03	0	0	0	0.017	0.01	NA	NA	NA	NA	NA	NA
LOC112937936	0.19	0.75	0.37	0.47	0.19	0.27	0	0.95	0.38	0.19	0.19	0.09	0.437	0.31	0.443	0.157	-0.44059	0.50541	0.47003	0.5077	-1.01984	0.23058
LOC9269675	12.17	11.76	12.01	32.03	15.91	22.56	17.37	23.56	16.51	18.98	27.2	17.58	11.98	23.5	19.147	21.253	1.00148	0	-0.31408	0	-0.16732	0.00138
LOC9270619	40	37.72	40.43	27.28	31.39	28.73	23.87	27.87	27.26	31.49	31.71	33.98	39.383	29.133	26.333	32.393	-0.4238	0	-0.14992	2e-05	0.14743	1e-05
LOC4324466	1.26	1.61	1.26	2.1	1.94	2.19	2.13	2.1	2.53	2.02	2.68	2.69	1.377	2.077	2.253	2.463	0.61341	0.00051	0.10325	0.57304	0.22244	0.17154
LOC4345978	7.18	5.78	7.39	7.82	13.44	13.24	13.45	12.46	11.12	12.36	9.26	9.69	6.783	11.5	12.343	10.437	0.77903	0	0.09532	0.21961	-0.14886	0.05157
LOC4341766	0.37	0.55	0.62	3.16	4.32	2.52	0.83	0.77	0.49	11.09	11.97	10.14	0.513	3.333	0.697	11.067	2.77523	0	-2.29833	0	1.72992	0
LOC4336894	17.26	15.65	16.18	15.67	21.93	17.08	17.75	18.91	18.09	19.39	17.52	17.06	16.363	18.227	18.25	17.99	0.17946	0.00641	-0.00755	0.93225	-0.03169	0.66179
LOC4339930	0.86	1.08	1.19	0.96	1.98	1.12	0.6	0.94	0.79	5.19	6.06	4.84	1.043	1.353	0.777	5.363	0.39399	0.07714	-0.80267	0.00083	1.98016	0
LOC112939352	0	0	0	0.03	0	0.07	0.07	0	0	0	0	0	0	0.033	0.023	0	NA	NA	-0.60036	0.71157	NA	NA
LOC4347314	1.29	1.62	1.57	2.6	2.87	2.8	3.33	4.5	3.72	4.72	3.96	4.98	1.493	2.757	3.85	4.553	0.91208	0	0.46754	0.00266	0.70841	0
LOC4339929	15.54	16.91	17.22	14.75	12.2	11.88	12.55	15.03	16.45	12.19	14.12	13.3	16.557	12.943	14.677	13.203	-0.29578	0	0.16019	0.01425	0.00414	0.96475
LOC9271710	27.22	26.48	27.71	25.02	26.29	23.74	26.02	26.44	26.35	23.89	22	21.92	27.137	25.017	26.27	22.603	-0.1077	0.0006	0.06779	0.04356	-0.1518	0
LOC4333094	14.18	14.75	15.5	17.25	31.71	25.16	19.42	16.51	14.59	15.27	12.85	10.99	14.81	24.707	16.84	13.037	0.64228	0	-0.62458	0	-0.79579	0
LOC4332287	33.93	34.07	34.1	27.86	30.29	31.54	22.76	26.75	25.92	27.88	26.95	28.45	34.033	29.897	25.143	27.76	-0.17188	0	-0.2565	0	-0.11577	0.00284
LOC4346250	0	0.08	0	0	0	0.4	0.16	0.25	0.08	0.57	1.33	1.06	0.027	0.133	0.163	0.987	2.36677	0.10436	0.24764	0.82566	2.82816	0
LOC107277845	0.06	0.15	0.06	0.12	0.31	0.15	0.18	0.15	0.12	0.27	0.27	0.27	0.09	0.193	0.15	0.27	1.12284	0.06067	-0.35643	0.55207	0.48712	0.31095
LOC4350893	1.07	1.06	1.15	2.06	1.93	1.56	1.42	1.58	1.9	2.24	2.74	2.11	1.093	1.85	1.633	2.363	0.77118	0	-0.1827	0.11996	0.34758	0.00052
LOC9269592	0.42	0.22	0.6	0.43	0.73	0.96	0.53	0.55	0.41	1.27	0.62	0.55	0.413	0.707	0.497	0.813	0.81157	0.06634	-0.53907	0.23734	0.18216	0.65947
LOC4332447	68.81	62.3	64.75	69.88	67.1	57.41	65.08	66.27	71.03	55.79	61.01	57.5	65.287	64.797	67.46	58.1	-0.00176	0.94053	0.05373	0.00569	-0.16319	0
LOC4349252	4.78	6.13	5.36	6.37	11.07	11.84	8.05	7.23	5.35	9.45	7.61	7.73	5.423	9.76	6.877	8.263	0.87406	0	-0.51726	0	-0.25505	0.0071
LOC4344874	9.27	8.29	9.52	15.77	16.1	20.39	11.52	12	15.67	21.29	17.66	19.64	9.027	17.42	13.063	19.53	0.98479	0	-0.43284	0	0.14366	0.05771
LOC4339078	10.11	10	10.43	8.24	11.07	9.77	8.6	10.16	9.36	13.43	11.39	13.56	10.18	9.693	9.373	12.793	-0.0581	0.34013	-0.05141	0.44563	0.39381	0
LOC4343944	150.81	148.95	171.89	129.2	84.99	114.36	91.41	122.14	112.09	70.83	73.34	79.62	157.217	109.517	108.547	74.597	-0.49968	0	-0.03143	0.2448	-0.57214	0
LOC9270809	37.38	38.55	41.09	30.46	25.2	26.37	32.57	31.48	34.95	26.85	24.36	20.72	39.007	27.343	33	23.977	-0.48067	0	0.25517	0	-0.21012	0.00021
LOC4324443	27.6	28.19	26.35	25.88	33.72	32.89	32.51	30.43	29.22	30.45	27.97	29.16	27.38	30.83	30.72	29.193	0.18938	1e-05	-0.01308	0.80273	-0.08878	0.04642
LOC107281953	0.63	0.89	0.7	0.85	1.52	1.17	0.74	1.15	0.92	1	1.39	0.92	0.74	1.18	0.937	1.103	0.67465	0.00053	-0.33243	0.09259	-0.10057	0.61473
LOC4351521	10.73	9.2	8.94	13.39	14.89	11.73	11.59	12.26	11.68	11.91	10.06	11.46	9.623	13.337	11.843	11.143	0.49755	0	-0.18277	0.02601	-0.27324	0.00066
LOC4339770	4.58	4.95	4.66	5.68	5.06	5.1	4.91	4.54	5.34	6.15	5.51	5.95	4.73	5.28	4.93	5.87	0.18732	0.13548	-0.11364	0.40479	0.13442	0.27932
LOC9271554	2.07	3.37	1.53	10.42	7.7	13.7	3.64	2.18	2.16	3.37	2.71	3.56	2.323	10.607	2.66	3.213	2.25658	0	-2.0292	0	-1.76446	0
LOC4323844	19.41	19.29	21.92	28.17	31.11	27.98	29.1	33.65	29.43	30.69	30.48	29.72	20.207	29.087	30.727	30.297	0.53896	0	0.0734	0.08971	0.05256	0.22425
LOC9266786	52.88	49.01	51.72	47.33	51.17	46.89	55.24	51.8	55.81	40.8	39.83	38.09	51.203	48.463	54.283	39.573	-0.0459	0.22431	0.13347	0.00026	-0.32047	0
LOC4330495	3.61	3.42	2.9	3.73	3.55	3.04	2.56	2.89	2.57	5.2	4.71	5.25	3.31	3.44	2.673	5.053	0.08361	0.5557	-0.38031	0.0083	0.53568	1e-05
LOC4324597	7.17	7.56	6.28	5.32	3.78	4.82	4.8	6.84	5.24	3.69	5.05	3.62	7.003	4.64	5.627	4.12	-0.55838	0	0.25813	0.06037	-0.19599	0.18679
LOC107278729	0	0	0	0	0.06	0.06	0	0	0	0	0.13	0.12	0	0.04	0	0.083	NA	NA	NA	NA	0.98016	0.48131
LOC107278924	0.12	0.1	0.19	0.12	0.28	0.22	0.1	0.25	0.15	0.22	0.32	0.12	0.137	0.207	0.167	0.22	0.60123	0.21599	-0.33733	0.51385	0.09119	0.85348
LOC112939635	0	0	0	0	0	0	0	0	0.11	0	0	0	0	0	0.037	0	NA	NA	NA	NA	NA	NA
LOC107277753	0.12	0	0	0.23	0.47	0	0	0	0.11	0.23	0.23	0.11	0.04	0.233	0.037	0.19	2.6298	0.05712	-2.60036	0.07128	-0.28287	0.78771
LOC4344474	58.88	63.16	57.59	73.55	73.63	68.17	83.05	70.47	73.96	64.25	68.79	66.95	59.877	71.783	75.827	66.663	0.29049	0	0.06516	0.06099	-0.12368	0.00028
LOC107279564	1.06	1.31	0.9	1.93	2.25	1.3	2.12	2.12	1.42	1.83	1.22	1.33	1.09	1.827	1.887	1.46	0.56752	0.01453	0.05364	0.83574	-0.29995	0.20042
LOC4332638	22.88	24.35	23.91	37.13	33.27	28.83	28.85	31.77	31.63	34.85	38.11	37.23	23.713	33.077	30.75	36.73	0.50012	0	-0.11443	0.01112	0.13601	0.00119
LOC4334156	18.52	17.04	18.59	23.86	18.92	18.14	15.74	22.52	21.02	15.56	17.02	17.74	18.05	20.307	19.76	16.773	0.17758	0	-0.04276	0.21283	-0.28337	0
LOC4324583	7.96	8.19	6.46	34.69	35.17	32.52	17.12	30.82	29.78	28.42	36.78	29.56	7.537	34.127	25.907	31.587	2.19434	0	-0.40391	0	-0.12144	0.00076
LOC4347864	4.04	4.22	3.28	3.32	3.58	2.93	2.7	3.21	3.87	4.48	4.51	4.82	3.847	3.277	3.26	4.603	-0.2304	0.01435	-0.01234	0.92624	0.47996	0
LOC4345227	43.01	44.48	43.76	60.39	41.52	38.27	29.91	44.99	41.53	38.4	43.48	40.37	43.75	46.727	38.81	40.75	0.10715	0	-0.27506	0	-0.2067	0
LOC4330414	1.72	2.16	1.96	2.37	2.34	3.2	2.32	2.87	2.3	3.02	3.92	3.07	1.947	2.637	2.497	3.337	0.46239	0.00529	-0.09298	0.61226	0.3216	0.03103
LOC112936600	0.02	0	0	0.06	0.07	0	0.04	0.11	0.05	0.09	0.02	0.04	0.007	0.043	0.067	0.05	2.6298	0.05712	0.56957	0.52909	-0.01984	0.99277
LOC4342102	31.46	29.77	28.88	31.15	36.49	36.7	36.4	35.02	37.38	35.63	37.3	32.9	30.037	34.78	36.267	35.277	0.25511	0	0.04365	0.27342	0.01414	0.73227
LOC4347851	5.28	5.97	5.24	11	12.18	8.44	5.56	5.65	5.78	32.25	36.54	29.15	5.497	10.54	5.663	32.647	0.98028	0	-0.91881	0	1.61574	0
LOC9268289	10.39	9.52	9.82	10.31	11.79	10.54	10.38	10.57	10.93	11.08	11.94	10.86	9.91	10.88	10.627	11.293	0.14698	0.01336	-0.03917	0.5616	0.04718	0.4528
LOC9266919	0	0	0	0	0	0.05	0	0	0	0	0	0	0	0.017	0	0	NA	NA	NA	NA	NA	NA
LOC4327525	4.89	4.12	4.41	8.68	7.77	6.18	3.27	5.56	4.41	9.66	10.64	10.31	4.473	7.543	4.413	10.203	0.79955	0	-0.70873	0	0.39078	0
LOC4333685	29.02	29.14	34.88	28.27	35.39	31.38	33.12	34.94	34.94	27.24	28.83	27.09	31.013	31.68	34.333	27.72	0.04195	0.34888	0.10873	0.01185	-0.19563	1e-05
LOC4343766	10.7	8.28	9.53	11.31	12.28	11.26	13.56	12.54	13.2	12.72	14.68	13.05	9.503	11.617	13.1	13.483	0.31128	4e-05	0.16357	0.02707	0.20207	0.00458
LOC4347127	12.09	12.94	11.85	13.89	17.08	16.98	16.63	12.2	12.01	13.91	14.1	12.13	12.293	15.983	13.613	13.38	0.4156	0	-0.2477	0.00381	-0.27879	0.00094
LOC107277641	0.4	0.4	0.47	0.92	1.29	0.79	0.67	1.1	1.05	1.28	0.7	0.88	0.423	1	0.94	0.953	1.24062	0	-0.09055	0.61622	-0.07203	0.67684
LOC107276016	0.04	0	0	0.08	0	0.04	0	0.04	0.04	0.04	0.04	0	0.013	0.04	0.027	0.027	1.6298	0.33725	-0.60036	0.71157	-0.6048	0.69423
LOC9266160	0.05	0.1	0.05	1.22	1.97	1.14	1.27	1.32	1.41	1.71	1.9	1.79	0.067	1.443	1.333	1.8	4.41988	0	-0.11431	0.55695	0.31248	0.05254
LOC4339975	7.75	7.13	6.19	4.33	4.65	4.85	5	5.62	5.47	5.07	6.46	5.33	7.023	4.61	5.363	5.62	-0.58931	0	0.21354	0.03033	0.278	0.00316
LOC4327877	0	0	0	0	0.07	0	0.06	0.06	0.13	0.03	0	0.03	0	0.023	0.083	0.02	NA	NA	1.9846	0.07905	-0.01984	0.99628
LOC4328690	12.04	11.57	10.57	11.43	12.15	11.51	9.39	11.59	11.1	11.45	12.99	13.01	11.393	11.697	10.693	12.483	0.04542	0.31242	-0.14034	0.00174	0.0859	0.04832
LOC4337679	5.8	5.97	3.72	8.68	16.89	14.37	9.95	6.47	7.31	14.46	10.84	13.89	5.163	13.313	7.91	13.063	1.3833	0	-0.7557	0	-0.03421	0.65056
LOC4345718	2.36	2.41	2.14	3.53	1.53	2.65	1.95	2.52	1.89	1.42	1.64	1.47	2.303	2.57	2.12	1.51	0.20383	0.34125	-0.3063	0.17632	-0.79924	0.00046
LOC4324158	0.59	0.54	0.21	1.82	2.29	1.39	1.89	1.75	1.3	5.36	3.78	3.87	0.447	1.833	1.647	4.337	2.05919	0	-0.16581	0.50598	1.22884	0
LOC107281101	0.18	0.35	0.17	1.5	2.05	2.54	3.21	4.54	2.51	1.11	2.01	1.57	0.233	2.03	3.42	1.563	3.16031	0	0.73537	7e-05	-0.39835	0.08568
LOC4340250	3.69	3.8	3.44	4.07	6.52	4.69	2.24	3.35	2.57	5.06	4.21	4.95	3.643	5.093	2.72	4.74	0.49569	0	-0.90766	0	-0.10856	0.29369
LOC4348999	44.11	44.85	43.29	40.5	43.78	47.46	49.41	54.09	53.99	45.62	48.05	49	44.083	43.913	52.497	47.557	0.00468	0.87256	0.25306	0	0.10917	1e-05
LOC4337160	0	0	0.16	0	0	0	0	0	0	0.11	0.37	0.05	0.053	0	0	0.177	NA	NA	NA	NA	4.30209	0.00279
LOC4335627	179.66	177.87	189.57	194.73	125.38	133.79	152.1	186.3	194.44	171.69	181.22	186.38	182.367	151.3	177.613	179.763	-0.2451	0	0.21765	0	0.23252	0
LOC4342528	13.78	16.61	12.61	6.8	6.44	6.76	2.24	2.38	2.72	1.72	1.2	2.07	14.333	6.667	2.447	1.663	-1.05253	0	-1.46996	0	-2.03289	0
LOC4345661	0	0	0	0	0	0	0	0	0	0.03	0	0	0	0	0	0.01	NA	NA	NA	NA	NA	NA
LOC4334424	12.41	12.75	13.32	17.14	17.32	17.17	17.9	21.36	18.87	17.12	15.96	17.7	12.827	17.21	19.377	16.927	0.47573	0	0.15453	0.00543	-0.06082	0.31246
LOC4349876	1397.37	1497.02	1017.15	1647.48	1335.11	1711.83	934.76	1008.92	884.57	1441.53	1198.86	1436.76	1303.85	1564.81	942.75	1359.05	0.31382	0	-0.75753	0	-0.23378	0
LOC4351494	0.58	0.46	0.64	1.01	2.55	1.4	1.03	1.22	0.82	1.26	1.38	1.05	0.56	1.653	1.023	1.23	1.5619	0	-0.69	1e-05	-0.4176	0.00434
LOC4352298	13.11	11.4	13.94	22.1	17.15	15.76	14.47	18.93	15.87	28.03	30.03	29.33	12.817	18.337	16.423	29.13	0.53443	0	-0.18815	0.00076	0.65257	0
LOC4324365	28.42	26.54	25.16	20.9	20.79	22.27	23	25.61	26.06	18.62	16.74	16.18	26.707	21.32	24.89	17.18	-0.29632	0	0.20924	0.0003	-0.3286	0
LOC4332274	21.13	20.53	22.29	24	22.45	26.54	24.89	25.85	25.7	19.3	20.36	21.71	21.317	24.33	25.48	20.457	0.2086	0	0.05933	0.2073	-0.25773	0
LOC4330302	67.28	61.55	62.59	81.94	79.86	70.78	72.95	72.22	73.98	61.13	59.59	56.7	63.807	77.527	73.05	59.14	0.29935	0	-0.09455	0.0003	-0.40174	0
LOC107275420	0.02	0.04	0.06	0.07	0.02	0	0.08	0.02	0.09	0.04	0.15	0.06	0.04	0.03	0.063	0.083	-0.2182	0.82892	0.9846	0.26406	1.35867	0.08116
LOC4339978	9.82	8.9	8.94	7.58	9.14	7.95	9.9	8.22	8.77	3.79	3.52	2.54	9.22	8.223	8.963	3.283	-0.16019	0.00079	0.12252	0.01502	-1.32688	0
LOC107279139	24.43	22.01	19.64	5.83	1.7	5.33	40.3	21.47	16.21	6.86	7.98	8.27	22.027	4.287	25.993	7.703	-2.29198	0	2.56421	0	0.79816	0
LOC107275360	0.13	0.13	0.09	0.13	0.14	0	0.18	0	0.18	0.09	0.04	0.04	0.117	0.09	0.12	0.057	-0.38098	0.66364	0.39964	0.67619	-0.61203	0.5696
LOC107278292	0.59	0.81	0.59	0.22	0.08	0	0.29	0.52	0.37	6.76	3.66	4.97	0.663	0.1	0.393	5.13	-2.71005	3e-05	1.9846	0.01081	5.68752	0
LOC4347417	13.73	15.59	14.91	16.84	13.94	22	8.84	9.11	9.24	5.19	4.32	6.35	14.743	17.593	9.063	5.287	0.30456	0	-0.99454	0	-1.75129	0
LOC4336296	4.66	3.62	3.87	5.54	4.5	4.03	5.18	5.46	5.61	5.83	5.4	3.95	4.05	4.69	5.417	5.06	0.23762	0.01613	0.20777	0.02943	0.09494	0.34478
LOC4334291	0.53	0.78	0.46	1.06	1.8	1.56	0.96	1.28	0.79	2.82	2.61	2.98	0.59	1.473	1.01	2.803	1.30386	0	-0.48475	0.00103	0.73865	0
LOC4344971	79.03	78.18	83.64	52.66	45.26	46.97	50.87	56.11	58.43	53.89	57.53	56.82	80.283	48.297	55.137	56.08	-0.72161	0	0.1851	0	0.20798	0
LOC4349761	5.57	5.11	5.51	5.72	7.99	6.41	7.23	6.9	6.77	6.62	6.94	6.07	5.397	6.707	6.967	6.543	0.33056	0.00042	0.04864	0.64059	-0.04482	0.6592
LOC4333005	2.79	2.33	2.77	4.32	4.67	4.57	4.31	4.1	4.59	4.76	5.66	4.11	2.63	4.52	4.333	4.843	0.81395	0	-0.07628	0.63918	0.07811	0.60628
LOC4328256	100.86	98.07	99.03	82.98	68.09	73.43	87.37	84.29	95.71	75.19	87.33	80.32	99.32	74.833	89.123	80.947	-0.40293	0	0.24252	0	0.10222	0
LOC4330468	0.16	0.13	0.06	0.78	2.46	1.3	0.06	0.29	0.51	2.64	2.56	2.62	0.117	1.513	0.287	2.607	3.72496	0	-2.40006	0	0.78312	0
LOC4331697	52.29	54.81	53.76	62.37	96.98	70.3	62.82	57.59	59.62	81.5	76.13	75.64	53.62	76.55	60.01	77.757	0.51995	0	-0.35536	0	0.01589	0.52023
LOC9270505	0.13	0.05	0.08	0.32	0.33	0.24	0.08	0.16	0.06	0.77	0.68	0.65	0.087	0.297	0.1	0.7	1.82911	0.00041	-1.51016	0.00293	1.27389	3e-05
LOC4337470	10.21	10.43	9.62	11.93	20.88	17.69	15.88	14.89	17.45	16.63	14.71	13.4	10.087	16.833	16.073	14.913	0.80747	0	-0.09765	0.42559	-0.21404	0.06133
LOC4329300	6.63	6.7	5.41	4.28	6.78	6.18	7.77	4.99	6.07	4.6	4.5	3.16	6.247	5.747	6.277	4.087	-0.11138	0.32013	0.1235	0.29822	-0.51914	1e-05
LOC107277835	0.64	0.36	1	0.36	0.94	0.97	0.9	1.11	0.09	0.73	0.09	0.45	0.667	0.757	0.7	0.423	0.22926	0.62836	-0.13569	0.79889	-0.85634	0.09478
LOC4333589	16.89	17.01	14.58	12.92	11.87	12.16	12.04	12.7	13.76	10.17	9.6	9.99	16.16	12.317	12.833	9.92	-0.37442	0	0.05064	0.44765	-0.32191	0
LOC9269201	0.36	0.48	0.51	0.15	0.31	0.15	0.27	0.24	0.42	0.51	0.12	0.27	0.45	0.203	0.31	0.3	-1.12509	0.00379	0.61687	0.18323	0.56512	0.21501
LOC107277065	6.38	9.19	8.37	12.07	2.48	4.15	3.86	4.16	4.72	2	2.96	2.39	7.98	6.233	4.247	2.45	-0.29379	0.04744	-0.58896	0.00071	-1.39226	0
LOC4325046	3.31	3.65	3.28	5.79	6.75	5.93	2.77	4.25	3.88	6.42	7	7.37	3.413	6.157	3.633	6.93	0.8616	0	-0.76425	0	0.16514	0.03522
LOC4325232	42.33	36.4	36.08	41.44	22.27	29.05	20.39	30.85	28.32	27.76	33	29.21	38.27	30.92	26.52	29.99	-0.26283	0	-0.24696	5e-05	-0.0735	0.23897
LOC4332455	33.42	30.25	18.83	52.24	61.52	71.43	9.81	14.12	11.67	441.41	513.73	553.39	27.5	61.73	11.867	502.843	1.19486	0	-2.39298	0	3.00977	0
LOC4337673	5.21	4.8	4.63	6.08	8.52	8.21	4.67	4.24	4.1	4.76	4.54	4.61	4.88	7.603	4.337	4.637	0.64665	0	-0.81258	0	-0.71688	0
LOC9270267	10.61	10.81	9.21	30.22	60.79	37.16	20.46	20.89	19.22	35.83	30.94	34.04	10.21	42.723	20.19	33.603	1.916	0	-1.013	0	-0.26847	0
LOC9267671	203.96	205.83	214.37	140.28	135.78	145.39	181.03	141.15	153.76	96.88	78.33	60.54	208.053	140.483	158.647	78.583	-0.50963	0	0.14883	0	-0.87327	0
LOC4344259	19.69	16.38	18.2	49.04	7.92	53.01	4.89	7.55	6.64	33.1	47.58	38.23	18.09	36.657	6.36	39.637	1.10577	0	-2.57083	0	0.05802	0.40731
LOC4347142	384.3	410.23	313.49	588.79	650.05	611.02	276.07	308.39	279.07	545.08	532.53	550.54	369.34	616.62	287.843	542.717	0.75978	0	-1.10861	0	-0.19585	0
LOC4332385	0.09	0.15	0.18	0.6	0.34	0.66	0.12	0.33	0.15	0.88	1.43	1.47	0.14	0.533	0.2	1.26	1.9654	0	-1.42139	0.00016	1.21803	0
LOC4339026	12.38	13.58	12.62	16.57	12.14	15.36	14.77	16.42	18.19	11.86	11.42	13.75	12.86	14.69	16.46	12.343	0.18121	0	0.15951	2e-05	-0.23971	0
LOC4334895	137.72	123.44	131.98	110.38	96.6	97.65	128.21	116.68	132.74	105.99	104.1	92.52	131.047	101.543	125.877	100.87	-0.35615	0	0.30137	0	-0.02552	0.32319
LOC4345846	3.6	2.86	3.98	5.05	7.84	5.86	3.57	3.78	3.21	35.8	36.29	37.03	3.48	6.25	3.52	36.373	0.85568	0	-0.83032	0	2.53618	0
LOC4331893	26.19	26.85	25.44	19.65	6.68	15.04	8.22	12.27	10.95	5.22	6.29	7.82	26.16	13.79	10.48	6.443	-0.89097	0	-0.4173	0	-1.12015	0
LOC9271479	4.02	7.42	2.82	42.76	6.4	23.48	0.35	0.27	0.09	3.36	4.69	5.37	4.753	24.213	0.237	4.473	2.41263	0	-6.7141	0	-2.48014	0
LOC9267999	2.47	4.22	1.19	44.57	57.74	49.02	1.91	2.87	2.92	8.15	11.37	5.03	2.627	50.443	2.567	8.183	4.28255	0	-4.3023	0	-2.63808	0
LOC4352868	242.51	250.1	249.12	649.52	676.11	704.6	528.47	549.72	497.33	706.36	794.24	673.01	247.243	676.743	525.173	724.537	1.52626	0	-0.35705	0	0.06215	3e-05
LOC4326978	21.33	19.66	20.33	19.42	16.62	17.84	17.3	18.54	20.03	18.73	18.97	18.62	20.44	17.96	18.623	18.773	-0.15582	0.01559	0.03677	0.6335	0.04441	0.54223
LOC112935985	0.22	0.07	0	0	0	0	0	0	0	0	0	0	0.097	0	0	0	NA	NA	NA	NA	NA	NA
LOC4350630	1.22	0.72	0.59	1.62	2.12	1.89	1.05	1.08	0.75	1.74	1.43	1.81	0.843	1.877	0.96	1.66	1.17259	0	-0.97521	0	-0.18366	0.29837
LOC4326566	0.18	0.09	0.27	0.99	2.03	1.04	0.64	0.55	0.96	0.5	0.51	0.36	0.18	1.353	0.717	0.457	2.91931	0	-0.92024	0.00065	-1.57238	0
LOC4339404	14.69	14.73	13.25	13.77	14.62	19.27	14.15	15.48	15.31	16.81	15.54	15.53	14.223	15.887	14.98	15.96	0.21091	0.02394	-0.11108	0.27009	-0.02499	0.8109
LOC4327083	14.71	14.28	13.85	14.8	17.38	16.56	18.17	19.07	18.16	17.55	18.38	16.47	14.28	16.247	18.467	17.467	0.20417	0.00039	0.17763	0.00141	0.094	0.10314
LOC4324832	2.69	2.87	2.71	3.71	4.29	3.05	4.45	3.69	3.7	3.72	3.37	3.09	2.757	3.683	3.947	3.393	0.42306	0	0.09765	0.17124	-0.12235	0.08501
LOC107276952	0	0.08	0.08	0	0	0	0	0	0	0	0	0	0.053	0	0	0	NA	NA	NA	NA	NA	NA
LOC4327881	4.46	4.47	4.61	5.51	4.37	3.67	4	5.02	5.4	7.19	7.32	5.97	4.513	4.517	4.807	6.827	0.01505	0.86641	0.08159	0.34923	0.58439	0
LOC4348196	0.11	0.07	0.15	0.19	0.12	0.23	0.42	0.65	0.76	0.19	0.61	0.19	0.11	0.18	0.61	0.33	0.68227	0.30518	1.87769	0	0.87325	0.08484
LOC4330022	1.46	1.56	1.57	5	9	9.68	5.69	6.25	8.6	8.35	7.06	8.5	1.53	7.893	6.847	7.97	2.35529	0	-0.24597	0.01674	0.00867	0.94514
LOC4324632	0.58	0.52	0.34	0.51	0.3	0.17	1.1	0.82	0.46	0.12	0	0.29	0.48	0.327	0.793	0.137	-0.51156	0.29688	1.25469	0.00313	-1.29995	0.05086
LOC4327794	41.49	41.89	43.7	32.65	25.56	28	29.62	32.73	33.67	29.82	32.68	29.42	42.36	28.737	32.007	30.64	-0.51727	0	0.13821	0.01468	0.08063	0.16469
LOC9269887	9.63	8.36	9.02	8.54	13.54	11.98	14.82	12.98	12.07	7.18	7.51	6.39	9.003	11.353	13.29	7.027	0.34862	0	0.22237	0.0006	-0.69988	0
LOC4330785	56.81	64.19	57.15	70.23	82.28	84.53	100.57	82.16	88.83	69.69	66.81	68.22	59.383	79.013	90.52	68.24	0.45011	0	0.17108	0	-0.22725	0
LOC4347823	12.27	11.9	11.91	9.49	11.62	12.38	14.65	10.6	11.94	5.36	4.45	4.44	12.027	11.163	12.397	4.75	-0.09041	0.18635	0.1436	0.03788	-1.24223	0
LOC4346457	0.39	0.17	0.26	0.69	0.41	0.26	0.27	0.31	0.22	0.13	0.26	0.13	0.273	0.453	0.267	0.173	0.75111	0.0888	-0.79967	0.08613	-1.38907	0.00468
LOC4345306	16.28	20.57	2.48	17.72	38.28	35.42	10.73	17.2	12.16	38.15	18.39	28.91	13.11	30.473	13.363	28.483	1.25264	0	-1.20553	0	-0.11412	0.06516
LOC4349443	8.23	5.4	6.01	17.46	10.57	12.85	6.26	7.44	6.87	84.3	112.29	122.47	6.547	13.627	6.857	106.353	1.08418	0	-1.00029	0	2.94688	0
LOC4348008	31.46	31.03	31.75	38.14	59.04	51.64	70.11	60.91	49.5	55.92	52.97	50.45	31.413	49.607	60.173	53.113	0.52775	0	0.24984	0	0.12836	0
LOC4341775	93.23	86.26	83.54	85.13	90.85	77.98	77.79	82.03	79.72	67.66	66.27	69.82	87.677	84.653	79.847	67.917	-0.03023	0.26309	-0.09366	0.00053	-0.32936	0
LOC4333811	58.65	59.43	59.18	87.73	81.56	70.21	88.37	81.6	75.5	66.56	59.54	59.03	59.087	79.833	81.823	61.71	0.45933	0	0.0232	0.4857	-0.38664	0
LOC4339737	0.04	0.04	0.11	1.45	1.81	1.93	3.74	4.28	3.32	1.79	2.28	2.13	0.063	1.73	3.78	2.067	4.89283	0	1.11764	0	0.24486	0.17047
LOC4345850	149.66	168.8	157.61	128.43	141.11	161.15	179.63	161.88	154.61	99.99	83.37	85.06	158.69	143.563	165.373	89.473	-0.11364	0	0.18882	0	-0.70085	0
LOC4351320	0	0	0	0	0	0	0	0	0	0.1	0	0	0	0	0	0.033	NA	NA	NA	NA	NA	NA
LOC4338551	11.33	9.86	10.71	11.79	12.43	10.95	9.54	11.94	10.28	11.36	13.69	13.16	10.633	11.723	10.587	12.737	0.14034	0.02321	-0.19082	0.00269	0.07406	0.2403
LOC4335810	0.74	0.83	0.8	1	2	1.64	1.36	1.44	1.28	1.84	1.54	1.16	0.79	1.547	1.36	1.513	0.9552	0	-0.17152	0.06416	-0.02679	0.78563
LOC4352828	103.53	100.25	91.29	157.26	148.97	133.74	59.24	89.12	80.38	131.7	137.14	143	98.357	146.657	76.247	137.28	0.58986	0	-0.94996	0	-0.10344	0
LOC4331302	831.84	1001.96	484.63	2490.77	3128.04	2695.62	93.23	77.81	95.02	1766.51	1255.24	1766.8	772.81	2771.48	88.687	1596.18	1.89458	0	-4.98816	0	-0.82333	0
LOC4344711	29.24	27.1	26.98	25.21	30.48	28.19	39.78	30.88	27.46	20.87	17.84	20.72	27.773	27.96	32.707	19.81	0.03269	0.53291	0.21579	0	-0.50969	0
LOC4325450	23.1	24.09	25.11	31.06	31.42	30.77	28.28	35.03	32.31	26.24	27.62	24.93	24.1	31.083	31.873	26.263	0.38446	0	0.02774	0.53785	-0.25384	0
LOC4325096	27.99	28.29	24.79	24.41	47.87	41.11	51.77	30.97	26.26	22.73	12.97	13.6	27.023	37.797	36.333	16.433	0.52704	0	-0.07245	0.26228	-1.22406	0
LOC107278593	0	0	0.22	0	0.22	0	0	0.11	0	0	0	0.22	0.073	0.073	0.037	0.073	0.04484	0.98352	-1.0154	0.62983	-0.01984	0.99628
LOC4324436	0	0	0	0	0.01	0	0.01	0	0.01	0	0	0	0	0.003	0.007	0	NA	NA	0.9846	0.63939	NA	NA
LOC9272161	13.48	13.73	13.11	16.67	16.49	16.01	19.26	14.56	15.71	16.36	13.63	13.56	13.44	16.39	16.51	14.517	0.3453	2e-05	0.008	0.94295	-0.22886	0.00562
LOC4352582	39.75	84.11	30.74	568.59	182.1	416.81	338.05	698.51	509.34	175.11	355.41	344.55	51.533	389.167	515.3	291.69	2.99551	0	0.35518	0	-0.47049	0
LOC4350441	3.6	3.51	3.24	3.76	5.25	4.98	4.95	4.47	4.2	5.04	6.02	5.65	3.45	4.663	4.54	5.57	0.44931	1e-05	-0.0446	0.69529	0.24849	0.00716
LOC107277078	0.02	0.07	0.14	0.04	0.11	0.14	0.14	0.11	0.04	0.04	0	0.07	0.077	0.097	0.097	0.037	0.23748	0.78111	0.44403	0.58374	-1.43488	0.15605
LOC4337442	1.82	2.04	1.9	2.88	3.74	2.36	2.38	2.85	2.91	4.4	4.14	3.97	1.92	2.993	2.713	4.17	0.64823	0	-0.14293	0.13796	0.47359	0
LOC4324511	0.32	0.42	0.58	2	1.62	1.12	0.53	0.7	0.6	1.23	1.81	1.37	0.44	1.58	0.61	1.47	1.87866	0	-1.39466	0	-0.1127	0.34421
LOC4326014	1.15	1.25	1.32	3.31	4.46	3.6	119.59	97.9	116.36	3.72	3.75	3.32	1.24	3.79	111.283	3.597	1.62023	0	4.87316	0	-0.08142	0.45094
LOC4334371	0.17	0.07	0.09	0	0.02	0.02	0.12	0.22	0.21	0.02	0	0	0.11	0.013	0.183	0.007	-2.76252	0.00279	3.50816	2e-05	-1.01984	0.61245
LOC4336513	2.06	2.05	2.09	1.75	2.51	2.49	2.12	2.2	2.11	1.22	1.08	1.51	2.067	2.25	2.143	1.27	0.13745	0.40343	-0.07647	0.67629	-0.83094	0
LOC107275667	0	0	0	0	0.04	0	0	0	0	0	0	0	0	0.013	0	0	NA	NA	NA	NA	NA	NA
LOC4330801	12.87	11.91	13.52	12.68	15.58	12.09	18.08	20.09	15.51	18.34	18.09	13.75	12.767	13.45	17.893	16.727	0.09361	0.16423	0.40363	0	0.30342	0
LOC4350681	26.96	26.18	25.33	17.72	23.97	23.69	26.3	20.3	21.42	26.21	23.7	21.57	26.157	21.793	22.673	23.827	-0.0384	0.39823	0.01705	0.74393	0.20845	0
LOC4324917	7.57	6.6	5.84	3.81	4.84	4.01	4.83	4.53	5.07	5.49	6.2	3.41	6.67	4.22	4.81	5.033	-0.63809	0	0.18061	0.17449	0.23848	0.05737
LOC4336742	27.55	26.11	28.1	22.71	19.95	25.34	28.3	23.24	23.9	21.32	18.91	17.78	27.253	22.667	25.147	19.337	-0.23714	1e-05	0.13471	0.01729	-0.24788	2e-05
LOC9267672	0.71	0.36	0.41	0.85	0.88	1.02	0.79	0.64	0.79	0.47	1.04	0.8	0.493	0.917	0.74	0.77	0.90733	0.00449	-0.33733	0.29451	-0.2543	0.41412
LOC4336950	28.31	27.88	29.09	32.08	36.38	34.03	31.94	31.78	31.19	28.21	26.49	24.97	28.427	34.163	31.637	26.557	0.28858	0	-0.14978	0	-0.3598	0
LOC4335826	0.88	1.13	0.72	2.51	3.81	2.92	1.38	1.41	1.57	2.97	2.58	2.45	0.91	3.08	1.453	2.667	1.76394	0	-1.08444	0	-0.21056	0.05563
LOC4346988	27.49	33.36	35.26	46.4	42.55	52.6	72.78	77.44	63.28	19.68	23.05	21.74	32.037	47.183	71.167	21.49	0.58259	0	0.57987	0	-1.15008	0
LOC9267764	2.27	1.49	1.46	2.19	2.82	2.28	2.85	2.08	2.28	2.29	2.42	2.01	1.74	2.43	2.403	2.24	0.49968	0.00234	-0.02278	0.91024	-0.12675	0.45539
LOC112936087	2.85	2.81	2.26	10.26	6.58	7.27	4.59	6.59	5.76	14.03	19.19	14.73	2.64	8.037	5.647	15.983	1.66854	0	-0.54352	0.00058	0.95121	0
LOC4330961	22.44	21.82	20.85	23.32	23.31	25.93	24.33	25.55	25.46	23.37	24.05	21.9	21.703	24.187	25.113	23.107	0.18667	2e-05	0.03881	0.42508	-0.0843	0.06383
LOC4333478	11	9.63	8.17	8.83	16.14	16.44	20.45	15.31	14.8	12.32	11.01	9.19	9.6	13.803	16.853	10.84	0.58506	0	0.2627	0.01485	-0.36948	0.00156
LOC107275710	16.39	18.29	18.68	7.39	1.68	3.66	7.83	11.22	13.88	1.36	1.08	1.02	17.787	4.243	10.977	1.153	-2.04441	0	1.3547	0	-1.90148	0
LOC4331347	180.88	180.12	180.76	169.15	173.84	177.32	215.88	176.8	194.79	174	165.25	152.99	180.587	173.437	195.823	164.08	-0.01446	0.60258	0.1547	0	-0.10663	5e-05
LOC107277619	0.67	0.55	0.81	0.47	0.42	0.29	0.61	0.63	0.58	0.55	0.59	0.44	0.677	0.393	0.607	0.527	-0.77619	0.00107	0.61687	0.01586	0.41312	0.12134
LOC4342622	0.31	0.11	0.14	0.2	0.39	0.29	0.41	0.49	0.66	0.55	0.82	0.52	0.187	0.293	0.52	0.63	0.6298	0.15527	0.8326	0.01691	1.09564	0.00067
LOC112937419	0	0	0	0	0	0	0	0	0	0.07	0	0	0	0	0	0.023	NA	NA	NA	NA	NA	NA
LOC4334057	13.98	12.75	13.27	15.46	15.17	14.44	15.17	14.86	15.68	13.58	14.39	11.81	13.333	15.023	15.237	13.26	0.18509	0.00013	0.01392	0.81099	-0.18904	0.00012
LOC4334459	84.81	85.77	87.07	91.59	65.68	70.89	70.87	80.74	83.56	68.46	72.59	71.47	85.883	76.053	78.39	70.84	-0.16093	0	0.03529	0.09064	-0.11251	0
LOC107280547	0.18	0.44	0.09	0.84	0.74	1.07	0.67	0.72	0.76	1.97	1.76	1.47	0.237	0.883	0.717	1.733	1.92748	0	-0.31308	0.33558	0.9555	4e-05
LOC4324858	0.9	1.18	0.98	7.89	6.75	8.14	10.21	5.27	8.41	1.87	0.6	0.98	1.02	7.593	7.963	1.15	2.93798	0	0.05029	0.70165	-2.74551	0
LOC4350283	19.34	16.11	18.73	3.4	4.42	5.24	7.2	6.67	5.77	3.72	2.43	4	18.06	4.353	6.547	3.383	-2.038	0	0.58159	0	-0.36996	0.00036
LOC4337152	1.11	0.9	0.73	1.23	1.43	1.39	1.75	1.9	0.97	2.72	2.47	2.34	0.913	1.35	1.54	2.51	0.57771	0.0039	0.18254	0.3547	0.88705	0
LOC4343695	0	0	0	0	0	0	0	0.09	0.09	0	0	0	0	0	0.06	0	NA	NA	NA	NA	NA	NA
LOC4338808	12.24	11.27	11.57	11.88	12.81	10.2	14.06	19.98	14.84	13.05	17.17	14.4	11.693	11.63	16.293	14.873	0.02537	0.76773	0.47087	0	0.32696	1e-05
LOC4349075	77.42	76.92	69.22	93.15	84.1	83.28	96.45	96.76	97.48	117.94	126.4	116.79	74.52	86.843	96.897	120.377	0.24312	0	0.14677	0	0.45705	0
LOC4339426	4.87	4.23	4.47	7.57	7.68	6.29	4.4	5.73	5.62	10.53	13	12.53	4.523	7.18	5.25	12.02	0.6698	0	-0.45163	0	0.73905	0
LOC4347936	3.48	4.14	4.78	9.51	7.19	7.1	5.57	6.59	6.33	5.4	6.47	7.31	4.133	7.933	6.163	6.393	0.94716	0	-0.37508	0	-0.33013	0
LOC112938628	0.19	0	0.09	0.04	0.28	0.17	0.09	0.08	0.18	0.09	0.18	0.09	0.093	0.163	0.117	0.12	0.04484	0.96735	-0.50082	0.62745	-0.82719	0.41127
LOC4344726	16.21	18.12	17.2	23.68	22.91	21.54	20.98	27.73	26.02	19.34	17.96	18.39	17.177	22.71	24.91	18.563	0.42312	0	0.12352	0.0134	-0.3035	0
LOC4330816	17.54	17.11	17.1	18.34	20.81	22.51	25.47	21.76	19.68	14.75	13.16	13.97	17.25	20.553	22.303	13.96	0.27043	1e-05	0.10515	0.08056	-0.58207	0
LOC4348920	15.15	13.5	13.99	13.97	22.51	21.45	22.97	20.65	20.13	16.91	17.3	13.18	14.213	19.31	21.25	15.797	0.45745	0	0.11468	0.01831	-0.27996	0
LOC107276711	0	0	0	0	0	0	0	0	0	0	0.06	0	0	0	0	0.02	NA	NA	NA	NA	NA	NA
LOC9271325	0	0	0	0	0.06	0	0	0	0	0	0	0	0	0.02	0	0	NA	NA	NA	NA	NA	NA
LOC4329875	20.55	19.82	20.62	23.86	14.51	14.79	12.68	16.73	17.53	17.4	19.36	20.01	20.33	17.72	15.647	18.923	-0.18687	0	-0.18703	0	0.08598	0.00314
LOC4344478	8.67	10.44	10.13	12.83	10.15	13.16	11.55	12.74	12.83	9.44	9.12	9.46	9.747	12.047	12.373	9.34	0.34115	0	0.02324	0.78367	-0.38914	0
LOC4349781	15.41	18.22	18.34	52.98	84.29	48.98	26.49	31.37	27.97	36.28	32.66	27.76	17.323	62.083	28.61	32.233	1.87159	0	-1.12891	0	-0.96112	0
LOC4338931	9.89	10.45	10.23	11.72	10.35	10.04	9.12	9.87	10.48	11.38	10.44	10.73	10.19	10.703	9.823	10.85	0.09098	0.20636	-0.13365	0.07336	0.00716	0.93608
LOC4324836	0.15	0	0.05	0.1	0.05	0.05	0	0	0	0	0	0	0.067	0.067	0	0	0.04484	0.97632	NA	NA	NA	NA
LOC4351265	5.01	4.08	4.5	6.27	7.43	6.36	6.18	5.49	5.47	3.95	4.87	5.07	4.53	6.687	5.713	4.63	0.52326	0	-0.20199	0.00308	-0.54122	0
LOC4344965	14.82	14.05	13.74	14.77	14.08	11.94	12.95	15.36	16.65	13.95	15.89	15.17	14.203	13.597	14.987	15.003	-0.08897	0.02217	0.11976	0.00239	0.14832	0.00011
LOC9267412	0.02	0	0.03	0	0	0	0.03	0	0	0	0.02	0	0.017	0	0.01	0.007	NA	NA	NA	NA	NA	NA
LOC4346316	55.78	54.35	57.38	82.29	72.23	63.46	73.34	72.49	67.73	101.87	120.17	104.14	55.837	72.66	71.187	108.727	0.42214	0	-0.04966	0.26023	0.55549	0
LOC112935989	0.06	0.29	0.17	0.69	1.19	0.86	0.29	0.58	0.29	1.22	0.88	1.38	0.173	0.913	0.387	1.16	2.4295	0	-1.24806	0.00147	0.33246	0.28829
LOC112937437	0.36	0.41	0.14	0.16	0.27	0.89	0.55	0.07	0.27	1.02	0.79	0.85	0.303	0.44	0.297	0.887	0.54985	0.1026	-0.57568	0.10514	1.00043	7e-05
LOC112936962	0	0.17	0	0	0	0	0.05	0.15	0	0	0	0	0.057	0	0.067	0	NA	NA	NA	NA	NA	NA
LOC107275839	0	0	0	0	0.07	0.07	0	0.07	0	0	0	0	0	0.047	0.023	0	NA	NA	-1.0154	0.62983	NA	NA
LOC9267441	0.06	0.13	0.04	0.14	0.17	0.14	0.1	0.1	0.11	0.14	0.19	0.12	0.077	0.15	0.103	0.15	0.92619	0.02885	-0.50082	0.24349	0.0208	0.96881
LOC4336526	0.65	0.6	0.38	0.97	0.85	0.59	0.11	0.22	0.22	0.16	0.11	0.16	0.543	0.803	0.183	0.143	0.59738	0.09821	-2.1529	0	-2.47927	0
LOC4345935	2.79	2.3	2.02	6.4	4.71	7.37	10.55	11.05	12.16	29.42	24.3	40.97	2.37	6.16	11.253	31.563	1.44595	0	0.81728	0	2.34056	0
LOC4341181	9.69	10.73	7.99	11.38	12.26	16.38	13.9	11.94	10.8	16.13	13.19	13.27	9.47	13.34	12.213	14.197	0.51794	0	-0.13656	0.13864	0.08135	0.36127
LOC107276609	0.02	0.02	0.05	0.29	0.26	0.12	0.09	0.26	0.24	0.32	0.78	0.42	0.03	0.223	0.197	0.507	2.80565	0	-0.19125	0.55668	1.16837	0
LOC107276796	0.05	0.15	0.03	0.4	0.28	0.24	0.42	0.33	0.25	0.06	0.05	0.14	0.077	0.307	0.333	0.083	2.08437	2e-05	0.02308	0.9681	-1.90736	8e-05
LOC4348983	29.88	30.1	30.56	29.65	33.95	35.64	32.88	35.29	33.34	27.84	24.79	28.07	30.18	33.08	33.837	26.9	0.15213	0.00025	0.02339	0.62741	-0.30929	0
LOC9267640	1.58	1.28	1.76	2.2	4.13	3.47	3.35	2.16	3.14	2.67	2.73	2.94	1.54	3.267	2.883	2.78	1.10098	0	-0.18463	0.21175	-0.23948	0.09229
LOC4343416	589.46	825.58	343.9	444.24	398.85	194.56	536.89	491.19	598.85	434.96	369.61	353.57	586.313	345.883	542.31	386.047	-0.71112	0	0.63319	0	0.12042	0
LOC9271146	5.07	4.82	4.65	5.35	5.54	5.25	5.58	5.28	5.26	4.31	5.16	4.39	4.847	5.38	5.373	4.62	0.16402	0.06517	-0.00841	0.9456	-0.22791	0.01175
LOC4342300	46.29	45.28	42.83	41.46	32.84	32.79	33.92	39.57	38.75	35.68	41.09	40.18	44.8	35.697	37.413	38.983	-0.31316	0	0.0599	0.05774	0.11751	7e-05
LOC9271275	9.68	8.8	8.39	12.2	10.6	13.59	12.58	12.57	11.73	10.11	8.74	8.07	8.957	12.13	12.293	8.973	0.48631	0	-0.006	0.97228	-0.46558	1e-05
LOC4342206	4.58	5.14	4.73	8.55	7	7.45	4.81	7.08	6.05	9.46	9.79	9.1	4.817	7.667	5.98	9.45	0.68611	0	-0.36688	0	0.2912	1e-05
LOC9266334	7.99	7.75	7.51	6.65	10.06	11.44	13.11	10.96	9.01	8	6.81	8.51	7.75	9.383	11.027	7.773	0.29043	8e-05	0.22636	0.00119	-0.27898	0.00019
LOC4341200	3.39	3.34	2.28	4.84	7.01	6.11	5.29	4.3	4.2	6.55	7.21	4.49	3.003	5.987	4.597	6.083	1.0637	0	-0.45945	0.0001	-0.05013	0.68452
LOC4327753	4.42	4.32	4.44	6.17	10.54	9.1	6.43	5.75	6.43	7.24	6.8	4.74	4.393	8.603	6.203	6.26	0.98843	0	-0.478	0	-0.46981	0
LOC4326954	10.29	7.8	10.33	11.86	12.54	13.01	14.85	14.34	12.91	10.39	11.04	10.14	9.473	12.47	14.033	10.523	0.43369	0.00025	0.1598	0.17355	-0.30846	0.00976
LOC4323912	0.22	0.16	0.27	0.16	0.74	0.44	0.22	0.22	0.39	0.22	0.22	0.27	0.217	0.447	0.277	0.237	1.04484	0.04632	-0.69347	0.19236	-0.90436	0.08599
LOC4337559	1.19	1.03	0.96	4.78	3.31	2.62	1.53	2.22	2.57	5.78	6.61	6.58	1.06	3.57	2.107	6.323	1.76795	0	-0.77069	0	0.81345	0
LOC4340217	16.73	19.44	18.12	15.72	16.76	15.62	16.07	16.14	14.89	18.82	15.46	19.54	18.097	16.033	15.7	17.94	-0.12625	0.11726	-0.06856	0.46074	0.18967	0.01749
LOC4335600	66.3	64.2	62.83	42.08	44.56	44.65	57.56	51.17	54.68	43.5	49.51	44.63	64.443	43.763	54.47	45.88	-0.54251	0	0.30943	0	0.05618	0.06591
LOC107278711	1.04	0.8	0.79	1.57	2.24	1.4	1.63	1.41	1.43	2.09	2.51	2.03	0.877	1.737	1.49	2.21	0.99062	0	-0.21596	0.04331	0.34682	0.00017
LOC9267632	1.08	1.52	1.15	8.28	17.27	11.91	7.9	10.55	7.13	17.27	17.49	15.08	1.25	12.487	8.527	16.613	3.20438	0	-0.55171	0	0.38644	0
LOC107281394	0.2	0.18	0.23	0.39	0.57	0.4	0.33	0.62	0.25	0.79	0.92	0.81	0.203	0.453	0.4	0.84	1.17435	0.00019	-0.18283	0.55646	0.89279	6e-05
LOC107279587	1.67	1.32	1.36	0.2	1.37	1.46	1.92	1.18	1.13	1.25	1.17	0.7	1.45	1.01	1.41	1.04	-0.3076	0.01627	0.42083	0.00097	0.10311	0.47838
LOC9266232	17.33	18.9	17.15	24.99	21.61	20.46	21.38	22.19	23.59	21.26	23.39	21.28	17.793	22.353	22.387	21.977	0.2768	0	-0.00227	0.97141	-0.04829	0.21978
LOC4331925	10.45	10.54	8.65	8.72	18.69	14.05	13.03	11.61	12.28	13.59	11.09	13.75	9.88	13.82	12.307	12.81	0.49374	0	-0.16799	0.00581	-0.11147	0.06608
LOC4329636	83.57	76.69	81.34	65.44	57.54	52.85	80.59	73.38	80.74	46.12	38.31	44.22	80.533	58.61	78.237	42.883	-0.44222	0	0.40789	0	-0.46112	0
LOC4349105	1.37	1.07	1.21	5.04	5.3	4.32	1.05	2.06	1.24	6.31	7.12	5.99	1.217	4.887	1.45	6.473	2.02101	0	-1.7586	0	0.39659	1e-05
LOC107278296	2.53	2.87	2.8	2.12	3.43	4.17	3.82	3.29	2.7	2.77	2.18	1.86	2.733	3.24	3.27	2.27	0.26965	0.07957	0.00323	0.9966	-0.52708	0.00094
LOC9268902	0.58	0.41	0.69	0.57	1.25	0.44	1.16	0.83	0.47	0.93	0.59	0.78	0.56	0.753	0.82	0.767	0.38508	0.18751	-0.05574	0.86977	0.10522	0.72245
LOC4329150	1.31	1.8	1.16	1.95	3.23	2.37	2.52	2.82	2.32	1.54	1.37	1.4	1.423	2.517	2.553	1.437	0.84185	0	-0.00506	0.98631	-0.77246	0
LOC4337140	19.5	16.89	24.81	25.07	2.88	9.97	6.86	9.23	12.26	4.84	5.29	6.21	20.4	12.64	9.45	5.447	-0.6522	0	-0.44622	0	-1.24318	0
LOC4331440	9.41	8.44	8.65	10.43	10.25	8.23	7.8	8.59	9.07	9.69	10.57	10.19	8.833	9.637	8.487	10.15	0.1235	0.00093	-0.18775	0	0.06679	0.07754
LOC4344471	1.23	1.33	1.2	0.98	3.26	1.46	1.47	1.37	0.86	3.31	3.55	2.44	1.253	1.9	1.233	3.1	0.52637	0.00065	-0.61999	0.00011	0.93058	0
LOC9268279	23.37	22.69	23.81	18.36	20.79	23.63	35.22	27.81	28.25	16.61	12.85	14.82	23.29	20.927	30.427	14.76	-0.12763	0.02616	0.52715	0	-0.51907	0
LOC4327403	0.23	0.08	0.18	0.33	0.69	0.46	0.33	0.39	0.28	0.95	0.67	0.84	0.163	0.493	0.333	0.82	1.6298	1e-05	-0.56289	0.08804	0.73223	0.00345
LOC4329457	3.88	4.21	3.82	2.73	1.35	2.04	3.8	3.02	3.62	0.75	1.51	1.17	3.97	2.04	3.48	1.143	-0.9317	0	0.75287	0	-0.85302	1e-05
LOC9267465	151.08	153.3	157.07	90.34	66.78	89.42	115.28	124.23	134.02	66.66	61.07	64.59	153.817	82.18	124.51	64.107	-0.86424	0	0.57133	0	-0.37668	0
LOC107276198	0.1	0.05	0.15	0.05	0.1	0.1	0.45	0.65	0.25	0.1	0.05	0.3	0.1	0.083	0.45	0.15	-0.2182	0.82892	2.41756	0.00013	0.82816	0.35178
LOC112936414	1.12	0.79	0.47	0.63	0.65	1.24	0.95	0.72	0.64	0.4	1.13	0.79	0.793	0.84	0.77	0.773	0.13795	0.74113	-0.15742	0.73378	-0.16186	0.71173
LOC4336434	0.08	0.08	0	0.15	0.23	0.07	0.15	0	0	0.53	0.46	0.37	0.053	0.15	0.05	0.453	1.6298	0.16728	-1.60036	0.19932	1.56512	0.02055
LOC9271182	0.08	0.12	0.12	0	0	0	0	0.08	0	0.04	0	0.04	0.107	0	0.027	0.027	-3.95516	0.00884	NA	NA	NA	NA
LOC4342345	6.27	5.43	5.84	6.13	8.85	6.98	5.71	6.34	6.44	9.16	8.44	6.86	5.847	7.32	6.163	8.153	0.32915	0	-0.24762	5e-05	0.15335	0.00784
LOC4337998	1.97	2.08	3.22	5.72	3.87	7.01	23.22	24.27	18.19	2.86	3.93	4.23	2.423	5.533	21.893	3.673	1.23277	0	1.95961	0	-0.61863	2e-05
LOC4340609	20.51	20.21	20.65	15.9	14.47	12.87	12.84	13.97	14.92	15.37	15.75	15.68	20.457	14.413	13.91	15.6	-0.48844	0	-0.05666	0.35615	0.10167	0.06599
LOC4327852	5.87	6.29	5.79	14.88	17.99	15.81	7.6	9.99	8.93	17.71	18.41	16.51	5.983	16.227	8.84	17.543	1.47886	0	-0.88908	0	0.07261	0.25566
LOC4346779	0	0.03	0.04	0.2	0.03	0.25	0.09	0.18	0.12	0.03	0.06	0.09	0.023	0.16	0.13	0.06	2.54734	0.00133	-0.40242	0.5269	-1.52234	0.02666
LOC4324059	0.4	0.39	0.31	0.26	0.18	2.95	0.18	0.22	0.35	0.67	0.67	0.62	0.367	1.13	0.25	0.653	1.66777	0	-2.19472	0	-0.82719	0.00338
LOC107276820	0	0	0.08	0.08	0.26	0.16	0.08	0.08	0	0	0	0.04	0.027	0.167	0.053	0.013	2.6298	0.00636	-1.60036	0.06136	-3.6048	0.00178
LOC4326401	7.03	7.46	7.13	3.44	3.33	3.5	3.7	4.14	3.85	5.86	5.99	5.26	7.207	3.423	3.897	5.703	-1.0507	0	0.175	0.22799	0.72191	0
LOC4330644	48.93	51.19	54.31	61.78	51.04	46.31	22.97	30.78	23.52	47.18	41.17	39.48	51.477	53.043	25.757	42.61	0.06553	0.04992	-1.05426	0	-0.33034	0
LOC4324263	93.49	90.62	97.98	79.46	59.85	70.95	92.6	93.1	102.19	124.75	143.14	119.34	94.03	70.087	95.963	129.077	-0.40458	0	0.44268	0	0.86748	0
LOC9266028	0.15	0.03	0.02	0.08	0.05	0.23	0.1	0.08	0.15	0.03	0.05	0.08	0.067	0.12	0.11	0.053	1.04484	0.10683	-0.20804	0.75396	-1.01984	0.12349
LOC4328314	38.59	36.92	35.77	47.03	40.82	42.98	27.38	37.85	35.98	39	40.87	44.84	37.093	43.61	33.737	41.57	0.24944	0	-0.37757	0	-0.10861	0.00265
LOC4328657	75.48	71.64	81.34	101.87	99.78	96.38	123.11	98.46	97.9	86.97	89.47	77.08	76.153	99.343	106.49	84.507	0.42901	0	0.07936	0.02836	-0.26131	0
LOC4341889	0	0	0	0.25	0.04	0	0.08	0.04	0.04	0	0.08	0.04	0	0.097	0.053	0.04	3.85219	0.01389	-0.82275	0.43211	-1.24223	0.2405
LOC4323836	5.37	4.12	6.46	2.54	2.63	2.86	3.18	3.02	2.73	2.63	2.48	2.72	5.317	2.677	2.977	2.61	-0.96515	0	0.13661	0.48951	-0.06048	0.76796
LOC4341431	45.51	40.3	41.36	56.26	47.75	45.17	38.25	52.19	42.42	71.64	76.29	67.15	42.39	49.727	44.287	71.693	0.24867	0	-0.17695	0	0.51579	0
LOC4329373	0.03	0.03	0.1	0.02	0.02	0.07	0.07	0.12	0.16	0.07	0.1	0.16	0.053	0.037	0.117	0.11	-0.69213	0.39102	1.79196	0.00617	1.71713	0.00866
LOC4324018	1.22	0.19	0	0.09	0	0.72	0	0.09	0	0.37	0.19	0	0.47	0.27	0.03	0.187	-0.69213	0.28887	-3.18532	0.01235	-0.6048	0.48374
LOC4324661	197.56	192.98	184.31	125.99	143.5	144.6	205.83	160.19	198.87	111.97	105.74	93.29	191.617	138.03	188.297	103.667	-0.45265	0	0.43895	0	-0.42553	0
LOC4337466	58.91	57.53	57.68	64.33	62.93	66.33	66.85	65.12	65.64	81.24	100.21	91.29	58.04	64.53	65.87	90.913	0.18269	0	0.01501	0.71797	0.47594	0
LOC4338059	0.38	0.55	0.27	1.06	2.53	1.21	0.42	0.94	0.41	1.14	0.91	0.86	0.4	1.6	0.59	0.97	2.01359	0	-1.441	0	-0.72555	0.00044
LOC4347211	0.27	0.19	0.22	0.12	0.15	0.2	0.02	0.15	0.12	0.1	0.13	0.17	0.227	0.157	0.097	0.133	-0.58743	0.18261	-0.63689	0.27609	-0.17184	0.75946
LOC4340350	0	0	0	0	0.03	0	0	0	0	0	0	0	0	0.01	0	0	NA	NA	NA	NA	NA	NA
LOC4344547	1.83	2.56	3.02	2.98	4.33	3.67	4.72	3.35	3.09	2.71	2.69	2.18	2.47	3.66	3.72	2.527	0.58635	2e-05	0.01541	0.92962	-0.54632	9e-05
LOC4327667	9.29	10.11	8.92	16.73	27.89	19.76	14.34	16.42	15.78	32.82	34.55	30.08	9.44	21.46	15.513	32.483	1.19114	0	-0.46823	0	0.59604	0
LOC4327106	0	0	0.08	0	0	0	0.08	0	0	0	0	0	0.027	0	0.027	0	NA	NA	NA	NA	NA	NA
LOC4346949	18.35	16.78	16.49	14.01	13.52	15.16	15.54	14.8	17.13	16.79	16.48	15.55	17.207	14.23	15.823	16.273	-0.25169	3e-05	0.14223	0.02938	0.17951	0.00425
LOC107275803	0.04	0.07	0.02	0.1	0.15	0.08	0	0	0	0	0.05	0.05	0.043	0.11	0	0.033	1.43864	0.02493	-5.20206	2e-05	-1.73141	0.01132
LOC9266778	1.9	2.48	2.49	2.64	3.35	2.34	3.65	4.67	3.61	6.04	7.37	6.21	2.29	2.777	3.977	6.54	0.29014	0.03224	0.51431	1e-05	1.23002	0
LOC4352219	21.66	19.79	20.1	23.61	17.23	22.89	20.24	17.86	16.32	20.31	17.97	16.51	20.517	21.243	18.14	18.263	0.13155	0.19719	-0.26765	0.01081	-0.26852	0.00928
LOC4331765	2.38	2.34	2.07	2.17	4.59	3.27	2.36	2.79	1.81	4.11	3.14	3.83	2.263	3.343	2.32	3.693	0.57037	1e-05	-0.52805	5e-05	0.14157	0.25039
LOC4340421	0.78	0.91	1.14	2.09	2.35	2.08	1.23	1.86	1.69	2.52	2.66	2.59	0.943	2.173	1.593	2.59	1.2166	0	-0.46018	0.00654	0.24197	0.11093
LOC4339809	50.09	52.24	49.26	56.3	52.15	54.67	58.66	55.49	59.04	44.78	48.11	43.97	50.53	54.373	57.73	45.62	0.13113	0.00019	0.07374	0.04159	-0.2693	0
LOC9269379	0.28	0.16	0.07	0.14	0.61	0.35	0.25	0.18	0.21	0.04	0.14	0.07	0.17	0.367	0.213	0.083	1.13906	0.01431	-0.79967	0.08613	-2.16668	9e-05
LOC4346251	0.08	0.17	0	0.17	0.52	0.08	0.17	0	0.08	0.17	0.34	0.42	0.083	0.257	0.083	0.31	1.6298	0.08749	-1.60036	0.10939	0.26967	0.72526
LOC4324008	0.56	0.07	0	0	0	0	0	0	0.1	0	0	0	0.21	0	0.033	0	-5.20309	1e-05	NA	NA	NA	NA
LOC4340722	1.15	1	1.41	1.44	2.42	2.41	1.59	1.74	2.25	2.62	2.36	3.01	1.187	2.09	1.86	2.663	0.79165	0	-0.17068	0.26753	0.31031	0.01812
LOC4326341	5.83	5.79	6.49	8.69	13.27	17.21	13.78	10.65	9.61	12.1	10.69	11.12	6.037	13.057	11.347	11.303	1.14624	0	-0.21834	0.01394	-0.2278	0.00898
LOC9266180	1.61	1.76	1.43	2.03	1.78	2.25	2.77	2.97	2.94	2.45	2.98	2.59	1.6	2.02	2.893	2.673	0.37008	0.09336	0.50182	0.00917	0.3819	0.05196
LOC107276878	1.06	1.1	0.48	1.77	1.58	1.41	1.29	1.48	1.54	1.1	1.75	0.74	0.88	1.587	1.437	1.197	0.88536	0.00155	-0.1529	0.59897	-0.42864	0.11528
LOC4342569	24.49	24.76	22.05	18.55	29.64	30.49	34.45	26.22	27.16	33.24	29.11	35.16	23.767	26.227	29.277	32.503	0.19193	0.00967	0.13677	0.06541	0.28122	4e-05
LOC4349025	7.23	8.28	8.17	14.71	9.7	14.48	12.63	13.45	11.26	11.87	9.75	9.35	7.893	12.963	12.447	10.323	0.74274	0	-0.07453	0.32587	-0.34685	0
LOC4350964	46.43	44.95	51.08	47.6	34.27	35.32	29.61	38.72	32.14	69.93	77.91	78.13	47.487	39.063	33.49	75.323	-0.24663	0	-0.24138	0	0.92402	0
LOC4330086	5.36	6.03	4.63	20.35	25.36	18.79	8.46	11.01	8.34	20.31	15.98	17.49	5.34	21.5	9.27	17.927	2.03356	0	-1.22464	0	-0.27564	1e-05
LOC4328940	68.85	84.87	80.05	87.58	67.3	98.17	73.02	77.98	92.64	72.02	63.15	77.6	77.923	84.35	81.213	70.923	0.16449	2e-05	-0.08214	0.04191	-0.2815	0
LOC4340073	0.36	0.19	0.19	0.12	0.15	0.17	0.25	0.25	0.12	0.1	0.05	0.12	0.247	0.147	0.207	0.09	-0.73943	0.09888	0.45853	0.377	-0.73033	0.22545
LOC4342034	3.44	3.77	3.16	4.72	5.29	6.97	5.94	5.91	5.41	4.3	3.67	3.95	3.457	5.66	5.753	3.973	0.73175	0	0.01369	0.9144	-0.52063	0
LOC4328136	30.2	27.38	28.5	32.15	30.8	30.92	27.09	27.51	28.43	33.42	36.64	33.71	28.693	31.29	27.677	34.59	0.14483	0.00048	-0.18673	1e-05	0.13233	0.00101
LOC4340158	1.04	0.98	1.5	1.22	1.32	1.13	1.14	0.86	0.85	1.52	1.63	1.55	1.173	1.223	0.95	1.567	0.08281	0.75699	-0.37529	0.18069	0.34273	0.15242
LOC4339218	236.39	251.05	271.1	297.17	168.24	208.66	154.78	211.49	218.23	177.42	190.11	196.13	252.847	224.69	194.833	187.887	-0.13913	0	-0.22066	0	-0.27704	0
LOC4326705	0	0	0	0	0	0	0	0.03	0	0	0	0	0	0	0.01	0	NA	NA	NA	NA	NA	NA
LOC9272420	8.15	8.15	7.53	10.98	15	13.85	17.73	13.64	14.43	16.28	12.27	13.91	7.943	13.277	15.267	14.153	0.79703	0	0.17768	0.11015	0.06119	0.60815
LOC4335026	22.59	23.3	25.31	29.07	27.31	25.81	25.58	29.37	29.4	25.19	24.88	24.74	23.733	27.397	28.117	24.937	0.23573	0	0.02365	0.66253	-0.14972	0.00172
LOC4342593	196.87	226.88	192.99	292.81	186.57	277.59	190.2	236.48	242.38	358.69	348.74	415.92	205.58	252.323	223.02	374.45	0.36507	0	-0.21575	0	0.52584	0
LOC4334195	3.67	3.46	3.63	6.08	5.27	4.49	4.15	4.5	3.72	5.89	6.1	5.12	3.587	5.28	4.123	5.703	0.47003	0	-0.32323	0.00014	0.16774	0.03452
LOC4344808	0	0.02	0.05	0	0.1	0.07	0.07	0.19	0.16	0.07	0.02	0.02	0.023	0.057	0.14	0.037	1.26723	0.21902	1.34717	0.04372	-0.50527	0.60839
LOC9272521	3.88	5.9	4.22	20.55	21.7	19.66	7.5	9.68	7.75	12.09	16.8	12.26	4.667	20.637	8.31	13.717	2.20195	0	-1.31282	0	-0.60209	0
LOC4340315	0.11	0.07	0.05	0.02	0.11	0.04	0.04	0.02	0.06	0.03	0.04	0.04	0.077	0.057	0.04	0.037	-0.46212	0.32474	-0.56289	0.34767	-0.56733	0.32701
LOC107280007	0.62	0.59	0.62	0.86	0.75	0.68	0.28	0.67	0.57	1.1	1.27	0.98	0.61	0.763	0.507	1.117	0.33466	0.20933	-0.5975	0.03521	0.53753	0.01796
LOC4331490	57.93	59.25	56.32	91.39	64.79	80.22	42.68	63.05	61.03	71.11	79.38	79.29	57.833	78.8	55.587	76.593	0.40699	0	-0.52684	0	-0.04719	0.02888
LOC4340201	4.51	5.87	4.57	11.25	10.4	19.14	13.94	13.24	15.79	15.68	15.03	19.93	4.983	13.597	14.323	16.88	1.50751	0	0.08214	0.27346	0.30486	0
LOC4335702	82.27	83.17	79.07	77.02	60.44	56.97	54.46	62.47	70.8	63.02	77.49	71.2	81.503	64.81	62.577	70.57	-0.31915	0	-0.0568	0.00565	0.11393	0
LOC4338737	1023.53	1025.64	1060.43	433.7	386.34	577.82	775.38	639.09	730.89	489.49	465.97	469.65	1036.53	465.953	715.12	475.037	-1.12479	0	0.60331	0	0.00961	0.45893
LOC4334733	92.02	98.34	92.55	66.99	89.6	91.41	121.33	112.55	105.38	67.75	59.87	55.39	94.303	82.667	113.087	61.003	-0.14917	2e-05	0.43299	0	-0.46271	0
LOC4334600	8.75	10.49	10.23	18.09	20.85	20.55	15.82	20.45	17.31	19.63	19.81	18.47	9.823	19.83	17.86	19.303	1.02592	0	-0.15659	0.00062	-0.04649	0.3283
LOC107277683	0	0	0	0.23	0	0.22	0.23	0.08	0.3	0.08	0.46	0.68	0	0.15	0.203	0.407	3.6298	0.02634	0.39964	0.67619	1.3952	0.04678
LOC9269338	0.38	0.51	0.44	0	0.45	0	1.01	0.63	0.77	0.32	0	0.23	0.443	0.15	0.803	0.183	-1.5415	0.01212	2.42821	0	0.27546	0.75325
LOC4334478	1.31	1.53	1.3	2.69	4.53	3.47	2.65	2.52	2.45	3.29	2.61	2.67	1.38	3.563	2.54	2.857	1.37232	0	-0.48625	0	-0.31974	0.00029
LOC4344600	8.79	7.62	7.56	7.61	6.51	7.57	6.66	5.85	6.34	13.52	13.95	11.23	7.99	7.23	6.283	12.9	-0.11476	0.26707	-0.21753	0.05062	0.8156	0
LOC4347756	0.3	0.17	0.38	0.34	0.48	0.42	0.57	0.52	0.43	0.38	0.65	0.26	0.283	0.413	0.507	0.43	0.58089	0.19526	0.2559	0.55791	0.02907	0.9579
LOC107277928	0.09	0.12	0.18	0.12	0.31	0.27	0.33	0.06	0.27	0.24	0.21	0.03	0.13	0.233	0.22	0.16	0.86796	0.0974	-0.07953	0.89086	-0.5434	0.29729
LOC4346414	17.86	16.24	15.29	15.31	14.92	14.91	18.36	16.5	19.46	18.4	18.98	16.28	16.463	15.047	18.107	17.887	-0.12055	0.0023	0.26256	0	0.2432	0
LOC4348984	0.29	0.33	0.6	0.97	0.96	1.66	1.36	1.84	1.46	1.13	0.58	0.69	0.407	1.197	1.553	0.8	1.57535	0	0.55095	0.00461	-0.55035	0.01867
LOC107275987	23.36	28.97	27.99	29.77	7.53	20.81	20.51	27.49	32.93	3.68	6.16	5.99	26.773	19.37	26.977	5.277	-0.42367	0	0.45017	0	-1.90791	0
LOC9267761	0.34	0.08	0.25	1.74	2.59	1.46	0.42	0.93	0.42	4.76	4.42	3.9	0.223	1.93	0.59	4.36	3.15336	0	-1.7316	0	1.15704	0
LOC4330655	1.55	1.59	1.52	4.86	4.64	3.74	3.13	4.81	3.6	6.14	7.26	6.82	1.553	4.413	3.847	6.74	1.51523	0	-0.20349	0.00863	0.60542	0
LOC4333864	31.12	29.29	28.87	33.29	41.73	28.92	19.39	24.28	20.3	42.58	46.02	38.77	29.76	34.647	21.323	42.457	0.23696	0	-0.70732	0	0.28356	0
LOC4325353	2.73	3.17	3.05	5.34	6.08	5.13	5.33	6.03	5.65	4.34	5.13	4.19	2.983	5.517	5.67	4.553	0.8968	0	0.03446	0.63509	-0.2735	3e-05
LOC4329722	0.03	0.03	0.22	0	0	0	0	0	0	0.1	0	0.03	0.093	0	0	0.043	-4.12509	0.0048	NA	NA	NA	NA
LOC4348847	0.16	0.31	0.15	1.31	1.45	0.61	1.78	2.2	2.18	0.93	1.9	1.55	0.207	1.123	2.053	1.46	2.4711	0	0.86212	0.00253	0.36125	0.26585
LOC107278840	0.08	0	0.16	0.08	0	0	0	0	0	0	0	0	0.08	0.027	0	0	-1.54013	0.36574	NA	NA	NA	NA
LOC4325446	5.49	5.82	4.75	2.82	2.88	3.85	3.74	3.51	3	1.54	1.42	1.27	5.353	3.183	3.417	1.41	-0.73155	0	0.09256	0.50619	-1.1849	0
LOC4329229	19.13	19.83	17.45	21.86	22.79	19.86	19.83	20.63	20.48	22.97	22.2	21.01	18.803	21.503	20.313	22.06	0.20689	0	-0.0865	0.05693	0.02773	0.55415
LOC4345580	25.16	33.05	20.85	84.85	75.93	71.2	57.53	75.35	73.17	72.67	80.04	68.6	26.353	77.327	68.683	73.77	1.61317	0	-0.20156	2e-05	-0.10459	0.02847
LOC4350555	9.53	10.8	10.04	15.31	13.7	14.25	13.76	12.51	12.49	12.64	14.04	11.63	10.123	14.42	12.92	12.77	0.54317	0	-0.17771	0.01778	-0.19978	0.00654
LOC4324977	15.26	13.75	14.86	17.85	16.04	15.64	12.66	16.52	15.22	18.27	18.31	16.45	14.623	16.51	14.8	17.677	0.18926	5e-05	-0.16507	0.0006	0.08901	0.05726
LOC4344335	0.09	0.05	0	0	0.14	0	0.09	0	0.05	0.09	0.05	0.09	0.047	0.047	0.047	0.077	0.04484	0.97985	-0.0154	0.99947	0.71713	0.55141
LOC4330863	4.16	3.6	4.02	5.15	8.66	6.15	5.33	6.56	6.14	7.27	8.17	7.57	3.927	6.653	6.01	7.67	0.77064	0	-0.14863	0.09064	0.20126	0.01084
LOC112935994	0.12	0	0.06	3.12	4.77	2.63	2.49	2.8	2.01	3.01	2.15	1.41	0.06	3.507	2.433	2.19	5.85219	0	-0.5312	3e-05	-0.68424	0
LOC107277400	0.96	1.17	0.53	2.75	3.22	1.88	1.2	1.56	1.86	3.43	3.52	2.76	0.887	2.617	1.54	3.237	1.61515	0	-0.79722	0	0.29026	0.05118
LOC4339188	155.19	158.56	159.54	118.92	127.92	151.31	136.53	154.29	143.31	127.33	122	135.42	157.763	132.717	144.71	128.25	-0.23168	0	0.11613	0	-0.0597	0.00205
LOC4325333	20.02	21.01	18.67	13.45	15.6	14.67	20.33	17.71	19.87	14.98	15.9	12.49	19.9	14.573	19.303	14.457	-0.43201	0	0.39614	0	-0.01984	0.75745
LOC107278265	2.1	1.73	1.6	2.54	3.9	4.22	3.62	2.83	2.85	2.99	3.94	2.76	1.81	3.553	3.1	3.23	0.98737	0	-0.20285	0.10082	-0.14486	0.23401
LOC107276775	0.89	0.98	0.72	0.81	1.22	1.13	1.52	1.42	1.38	0.7	0.88	0.82	0.863	1.053	1.44	0.8	0.73671	0.00052	0.52302	0.00314	-0.32469	0.12047
LOC4349210	0.66	0.82	0.71	1.15	1.6	1.2	1.1	0.89	0.94	0.72	0.78	1.15	0.73	1.317	0.977	0.883	0.87266	0.00272	-0.43722	0.13472	-0.58462	0.04171
LOC4324837	27.15	28.03	27.29	24.34	27.41	27.09	23.54	23.37	25.26	26.92	23.88	22.1	27.49	26.28	24.057	24.3	-0.0485	0.27601	-0.13718	0.00248	-0.12027	0.0073
LOC107281299	0.19	0.05	0	0.37	0.29	0.07	0.14	0.07	0.02	0.5	0.17	0.44	0.08	0.243	0.077	0.37	1.67711	0.00089	-1.64767	0.00146	0.58055	0.10651
LOC4327998	0.28	0.16	0.23	0.42	0.72	0.37	0.2	0.17	0.28	0.65	0.28	0.43	0.223	0.503	0.217	0.453	1.17914	1e-05	-1.22185	1e-05	-0.15414	0.54649
LOC4352082	0	0	0	0.28	0.44	0.57	0	0	0	0	0.07	0.04	0	0.43	0	0.037	6.21476	0	-6.18532	0	-3.6048	0
LOC4348185	644.41	626.89	597.67	418.41	510.51	532.93	762.59	522.58	618.32	350.59	270.55	270.77	622.99	487.283	634.497	297.303	-0.29703	0	0.35551	0	-0.74647	0
LOC4326397	11.03	10.41	9.07	7.5	11.32	8.65	10.8	9.45	11.29	5.35	4.47	3.84	10.17	9.157	10.513	4.553	-0.13846	0.05098	0.19535	0.0064	-1.01488	0
LOC4323865	0.27	0.27	0.28	0.7	1.28	0.74	0.65	0.87	1.16	2.65	2.19	2.38	0.273	0.907	0.893	2.407	1.73573	0	-0.0218	0.90721	1.41028	0
LOC4352550	175.41	171.85	172.59	104.98	119.9	117.47	162.03	107.77	104.74	80.38	61.33	72.86	173.283	114.117	124.847	71.523	-0.54649	0	0.10635	0.00587	-0.70813	0
LOC4349500	2.19	2.77	2.3	5.3	5.75	4.35	3.98	5	4.03	9.87	11.84	9.22	2.42	5.133	4.337	10.31	1.10657	0	-0.25298	0.03334	0.99332	0
LOC4339568	110.06	105.6	103.07	57.29	93.78	83.49	72.01	65.85	59.5	74.84	48.94	66.85	106.243	78.187	65.787	63.543	-0.42319	0	-0.25631	0	-0.30787	0
LOC9266763	5.98	6.23	5.08	7.58	6.84	9.45	9.05	9.76	9.54	8.1	7.4	7.29	5.763	7.957	9.45	7.597	0.51958	9e-05	0.21809	0.08433	-0.09487	0.49187
LOC4349771	3.79	2.99	3.11	5.57	5.95	4.82	5.13	5.05	5.69	6.25	5.92	5.59	3.297	5.447	5.29	5.92	0.7379	0	-0.04867	0.62039	0.11207	0.19121
LOC4336902	0.03	0.12	0.14	0.14	0.18	0.19	0.05	0.09	0.26	0.02	0.17	0.12	0.097	0.17	0.133	0.103	0.81536	0.07669	-0.34982	0.46298	-0.70789	0.12908
LOC107278523	0.03	0.03	0.03	0.03	0.02	0	0.18	0.29	0.15	0.03	0.05	0.06	0.03	0.017	0.207	0.047	-0.95516	0.38048	3.75719	0	1.56512	0.10846
LOC4329960	16.65	17.92	17.42	10.09	10.72	12.64	11.85	13.62	13.3	12.19	14.71	12.42	17.33	11.15	12.923	13.107	-0.61236	0	0.20699	0.00572	0.21189	0.00397
LOC4328909	6.43	6.58	5.11	19.46	34.4	26.42	9.27	11.7	9.37	20.96	22.59	28.05	6.04	26.76	10.113	23.867	2.17896	0	-1.41681	0	-0.18073	0.00488
LOC4344382	1.04	0.92	1.21	0.09	0.06	0.44	0.29	0.29	0.12	0.09	0.03	0.14	1.057	0.197	0.233	0.087	-2.41459	0	0.24764	0.64229	-1.17184	0.05093
LOC4352147	162.12	167.83	179.45	82.1	62.8	72.4	91.5	82.21	100.27	66.87	60.61	68.75	169.8	72.433	91.327	65.41	-1.26182	0	0.32314	0	-0.16118	0
LOC4341339	457.87	474.84	465.54	382.35	264.63	313.37	394.54	377.63	401.2	310.06	330.65	341.71	466.083	320.117	391.123	327.473	-0.52159	0	0.27725	0	0.01916	0.11931
LOC4330552	48.22	52.24	38.27	86.79	95.14	96.52	47.53	50.38	35.35	39.6	28.84	38.39	46.243	92.817	44.42	35.61	1.02258	0	-1.07223	0	-1.39137	0
LOC107278630	0	0	0.05	0.16	0.17	0.11	0.11	0.11	0	0.28	0	0.05	0.017	0.147	0.073	0.11	3.04484	0.01693	-1.0154	0.30657	-0.43488	0.6312
[truncated: 24,009 more rows]

## Sheet: Table S4
Table S4. 743 DEGs in the comparison groups of 25℃ vs 35℃, 35℃ vs 35℃+STS, and 35℃ vs 35℃+AOA
Screening Conditions of DEGs	Gene symbol	log2FC (25°C vs 35°C)	Q-Value (25°C vs 35°C)	log2FC (35°C vs 35°C+STS)	Q-Value (35°C vs 35°C+STS)	log2FC (35°C vs 35°C+AOA)	Q-Value (35°C vs 35°C+AOA)
Log2FC(25°C vs 35°C)≥ 1 Log2FC(35°C vs 35°C+STS)≤-1 Log2FC(35°C vs 35°C+AOA)≤-1 （340）	LOC4334864	3.5684	0	-3.53896	0	-1.5434	0.00016
	LOC4336794	3.05266	0	-1.38691	0	-2.57394	0
	LOC107276247	3.31569	0	-2.04163	0	-2.03947	0
	LOC107281879	1.47173	0	-1.34494	0	-2.14786	0
	LOC4347069	3.4711	0	-3.8567	0	-1.74566	6e-05
	LOC107278166	1.73786	0	-1.80796	0	-1.23893	0
	LOC107277012	5.91976	0	-1.42366	0	-2.89875	0
	LOC4336798	2.73073	0	-1.48338	0	-1.6747	0
	LOC9267999	4.28255	0	-4.3023	0	-2.63808	0
	LOC4329093	1.95013	0	-2.37724	0	-1.25719	0
	LOC107278411	5.23466	0	-2.11776	0	-1.16527	0.00013
	LOC4339068	2.04057	0	-8.79249	0	-8.79693	0
	LOC4342063	5.46423	0	-2.65362	0	-2.00031	0
	LOC107278774	2.65837	0	-1.27279	0	-1.06777	0
	LOC4347408	1.30787	0	-1.88154	0	-2.33178	0
	LOC4336857	5.8262	0	-2.09632	0	-6.8012	0
	LOC4335993	2.13396	0	-2.4194	0	-1.24223	0
	LOC4331886	1.57294	0	-1.62965	0	-1.92854	0
	LOC9272330	4.04484	0.00012	-5.0154	9e-05	-5.01984	7e-05
	LOC4346153	6.02212	0	-6.99268	0	-2.99712	0
	LOC107277982	2.79691	0	-5.43043	0	-3.11295	0
	LOC107276173	1.98556	0	-1.95624	0	-1.08832	0
	LOC4352439	1.6643	0	-1.54936	0	-2.15116	0
	LOC4340754	3.46334	0	-2.13434	0	-2.55382	0
	LOC9270308	3.40551	0	-7.82232	0	-4.13374	0
	LOC9267428	4.08923	0	-2.73786	0	-2.47927	0
	LOC107275256	1.65957	0.00016	-2.80171	0	-2.0412	2e-05
	LOC107276957	3.40941	0	-5.11694	0	-1.45841	0
	LOC9270078	1.28391	0	-1.11088	0	-1.11532	0
	LOC4327887	1.6422	0	-1.73762	0	-1.37677	0
	LOC4332378	5.36677	0	-7.33733	0	-6.34177	0
	LOC4329486	3.6298	0	-2.0154	0	-1.51734	0.00014
	LOC4334907	1.30262	0	-1.61403	0	-2.18262	0
	LOC4324822	1.45185	0	-1.34571	0	-2.13779	0
	LOC4348094	2.26723	0	-4.82275	0	-6.41216	0
	LOC4348382	5.68869	0	-2.65925	9e-05	-5.66369	0
	LOC4346220	3.99903	0	-6.96959	0	-1.72611	0
	LOC4346292	2.70504	0	-4.65642	0	-1.52398	0
	LOC4332778	1.36372	0	-1.35514	0	-1.13799	0
	LOC4345748	2.77755	0	-1.05422	1e-05	-1.55462	0
	LOC4324213	3.21544	0	-9.48978	0	-1.9759	0
	LOC9268985	4.36677	1e-05	-3.33733	9e-05	-4.34177	1e-05
	LOC4326048	4.1878	0	-2.15836	0	-1.84087	0
	LOC4345703	1.88404	0	-1.14036	0	-1.64959	0
	LOC4338958	3.57943	0	-1.61508	0	-1.75925	0
	LOC4325571	1.12973	0.00021	-1.97476	0	-2.68969	0
	LOC4329013	2.75756	0	-2.43861	0	-2.44305	0
	LOC4331336	4.48243	0	-3.25882	0	-3.36051	0
	LOC9268839	1.31699	0	-3.46248	0	-1.136	0
	LOC4334834	8.73832	0	-7.70888	0	-3.06947	0
	LOC4348341	7.09079	0	-9.54678	0	-6.74386	0
	LOC107278602	2.2775	0	-1.56999	0.00013	-1.48696	0.00021
	LOC4337274	2.05867	0	-7.33082	0	-2.6845	0
	LOC4336108	3.27091	0	-2.44001	0	-1.03089	0
	LOC9269462	1.8873	0	-1.0154	5e-05	-1.04785	2e-05
	LOC4341170	2.53408	0	-1.90791	0	-4.257	0
	LOC4347412	1.51639	0	-1.6606	0	-1.39086	0
	LOC4326826	1.66083	0	-1.15495	0	-1.15939	0
	LOC4333060	3.42296	0	-1.24115	0	-1.00922	0
	LOC4351721	1.57796	0	-1.18973	0	-1.45456	0
	LOC4324330	6.14871	0	-4.20173	0	-1.57939	0
	LOC4344505	5.90282	0	-5.87338	0	-5.87782	0
	LOC4332896	1.43033	0	-2.10784	0	-2.17738	0
	LOC4326946	1.07586	0	-1.09278	0	-2.54201	0
	LOC4347919	1.65658	0	-1.40036	0	-1.87676	0
	LOC9268653	2.48807	0	-1.09185	0	-1.711	0
	LOC4341299	2.51877	0	-2.19982	0	-1.41577	0.00023
	LOC107277149	1.42671	0	-1.39727	0	-1.90178	0
	LOC9266825	5.5684	0	-4.53896	0	-4.5434	0
	LOC9267997	4.45083	0	-1.38577	0	-1.88978	0
	LOC4338619	6.62227	0	-8.59283	0	-3.27534	0
	LOC4343492	4.36436	0	-3.76068	0	-1.7464	0
	LOC4348633	5.62334	0	-5.23133	0	-3.04815	0
	LOC107275911	2.01682	0	-4.36589	0	-4.69226	0
	LOC107276905	2.67419	0	-3.57436	0	-1.53649	0
	LOC9271477	1.46768	0	-1.29048	0	-3.20221	0
	LOC4330552	1.02258	0	-1.07223	0	-1.39137	0
	LOC107278464	3.50466	0	-3.21219	0	-2.99424	0
	LOC107276195	4.21371	0	-1.38235	0	-2.25673	0
	LOC4347520	1.16799	0	-1.59382	0	-1.23134	0
	LOC4342187	2.06895	0	-1.06288	0	-4.91117	0
	LOC4325697	3.41779	4e-05	-5.38835	1e-05	-3.39279	5e-05
	LOC112936093	2.4778	0	-7.35525	0	-2.77473	0
	BGIG39947_31962	6.51516	0	-4.61125	0	-2.82719	0
	LOC4349274	2.84149	0	-2.07012	0	-1.01626	0
	LOC4335075	5.23861	0	-4.07167	0	-1.8351	0
	LOC4327297	9.60708	0	-5.57764	0	-1.1812	0
	LOC4344708	1.85219	0	-6.28218	0	-2.28662	0
	LOC4335218	2.59044	0	-1.04095	0	-1.04461	0
	LOC4334567	5.16031	0	-3.0154	0	-3.26085	0
	LOC9270863	1.55674	0	-1.09236	0	-1.05781	0
	LOC4324664	3.45471	0	-1.25994	0	-1.26438	0
	LOC4343047	5.29276	1e-05	-5.26332	2e-05	-5.26777	1e-05
	LOC107276199	4.88853	0	-6.66645	0	-3.86354	0
	LOC4343726	4.91931	0	-2.70224	0	-1.83541	0
	LOC9269854	2.97715	0	-3.29389	0	-1.00604	0
	LOC4329324	2.75623	0	-2.11782	0	-1.72702	0
	LOC4336955	1.11426	0	-1.59071	0	-1.40612	0
	LOC4345909	1.70444	0	-1.06891	0	-1.12458	0
	LOC4336442	1.21048	0	-1.36183	0	-1.68411	0
	LOC4344266	1.28362	0	-4.89804	0	-2.58055	0
	LOC4351034	2.85219	0	-5.32525	0	-2.1073	0
	LOC4333404	2.54734	0	-3.68782	0	-2.88491	0
	LOC4328579	1.74257	0	-1.9414	0	-1.16823	0
	LOC4331085	4.54762	0	-6.68811	0	-2.03034	0
	LOC4342440	3.88614	0	-3.63431	0	-3.4461	0
	LOC4328788	1.11394	0	-1.2208	0	-1.37109	0
	LOC107277021	1.36677	0	-1.05722	2e-05	-1.37653	0
	LOC107275898	3.79972	0	-4.94021	0	-1.02579	0
	LOC9268919	2.30422	0	-1.79562	0	-1.13379	0
	LOC4346629	2.35638	0	-6.05056	0	-1.68454	0
	LOC107277163	2.99205	0	-1.26104	0	-1.5755	0
	LOC4342086	1.43361	0	-3.36023	0	-1.48496	0
	LOC4344662	2.13924	0	-1.50916	0	-1.48274	0
	LOC4336189	2.8262	0	-3.79676	0	-2.21624	0
	LOC4352592	1.9559	0	-1.03217	0	-2.83976	0
	LOC9268017	3.65861	0	-7.76667	0	-1.48423	0
	LOC9266373	2.11394	0	-1.78157	0	-1.61124	0
	LOC9266405	1.75533	0	-1.14093	0.00022	-1.38241	1e-05
	LOC4336235	1.5781	0	-4.19252	0	-1.764	0
	LOC112938358	3.01572	0	-1.27896	0	-1.2096	0
	LOC4327273	1.11195	4e-05	-4.47483	0	-2.30935	0
	LOC4343098	5.55668	0	-4.18532	0	-1.44817	0
	LOC9269764	4.28585	0	-5.76164	0	-1.05494	0
	LOC107276262	1.6298	1e-05	-1.44836	0.00011	-2.96737	0
	LOC4329638	2.5217	0	-2.79122	0	-2.52789	0
	LOC4343079	2.27904	0	-1.4467	0	-1.82995	0
	LOC4342204	3.85219	0.00042	-4.82275	0.00027	-4.82719	0.00023
	LOC4333807	2.74983	0	-4.82275	0	-1.89229	0
	LOC4346709	2.91129	0	-3.91747	0	-1.1249	0
	LOC107277282	1.36004	0	-2.08444	0	-3.59138	0
	LOC4345687	1.57921	0	-1.01267	0	-1.39917	0
	LOC9267503	4.214	0	-4.13049	0	-2.83776	0
	LOC4328496	5.26207	0	-4.53219	0	-2.90079	0
	LOC4330716	3.1937	0	-1.53808	0	-1.18447	0
	LOC4352082	6.21476	0	-6.18532	0	-3.6048	0
	LOC9266773	1.67489	0	-1.28288	0.00011	-2.13532	0
	LOC4338925	1.58326	1e-05	-1.62421	1e-05	-3.95058	0
	LOC4341212	2.02756	0	-1.34604	0	-1.00256	0.00031
	LOC4333712	2.74528	0	-5.3008	0	-2.98331	0
	LOC4331916	1.00925	0	-1.12488	0	-1.82186	0
	LOC107277966	2.7818	0.00025	-2.75236	0.00039	-2.7568	0.00033
	LOC4346295	2.78559	0	-2.17119	0	-1.68659	0
	LOC4351819	4.53257	0	-3.3128	0	-3.06506	0
	LOC4324610	1.79581	0	-2.37498	0	-1.03033	0
	LOC4342076	2.11274	0	-1.5217	0	-1.26803	0
	LOC4331524	1.48224	0	-1.54591	0	-2.95474	0
	LOC4344737	1.03855	0	-1.34681	0	-1.06463	0
	LOC4340683	3.42566	0	-5.98118	0	-3.52619	0
	LOC4335326	1.55001	0	-1.09986	0	-1.56533	0
	LOC4331063	2.23377	0	-1.37483	0.00012	-2.20877	0
	LOC107278611	2.68554	0	-5.8525	0	-1.00727	0
	LOC4348268	4.43372	0	-5.91885	0	-3.14568	0
	LOC4348796	1.38085	0	-1.96746	0	-1.20692	0
	LOC4352613	1.42187	0	-2.22208	0	-1.18939	0
	LOC107280422	7.87773	0	-3.14785	0	-1.36088	0
	LOC9266659	5.44121	0	-6.27027	0	-2.00851	0
	LOC4345815	6.01062	0	-6.98118	0	-3.17827	0
	LOC4342046	7.20471	0	-2.20564	0	-1.36379	0
	LOC4340079	2.07458	0	-1.48036	0	-3.24223	0
	LOC4332705	4.37982	0	-2.72235	0	-1.86006	0
	LOC4344255	3.08772	0	-4.91626	0	-1.56315	0
	LOC4326814	1.32406	0	-1.5758	0	-1.25467	0
	LOC4329742	1.98516	0	-4.93463	0	-1.26037	0
	LOC9270824	7.60708	0	-4.11821	0	-2.15582	0
	LOC4329459	1.82489	0	-2.18358	0	-1.03351	0
	LOC4336343	3.87773	0	-3.90487	0	-3.99858	0
	LOC4329329	1.8461	0	-3.74811	0	-2.08176	0
	LOC9270349	3.43311	0	-2.09881	0	-2.28612	0
	LOC4330713	3.275	0	-2.30984	0	-1.46604	0
	LOC107275828	3.21476	0	-2.86339	0	-3.6048	0
	LOC107276210	4.24647	0	-6.53896	0	-7.5434	0
	LOC4337313	2.78083	0	-1.2604	0	-1.20373	0
	LOC4351918	1.5478	0	-1.10246	0	-1.51029	0
	LOC4347547	2.21042	0	-1.60908	0	-1.78017	0
	LOC107277348	2.47534	0	-3.37528	0	-2.82872	0
	LOC4325014	3.53625	0	-1.83245	0	-1.4579	0
	LOC107276985	5.08134	4e-05	-5.0519	7e-05	-5.05634	6e-05
	LOC4339066	1.72747	0	-5.79201	0	-5.10457	0
	LOC9271479	2.41263	0	-6.7141	0	-2.48014	0
	LOC4341552	2.25429	1e-05	-1.90292	0.0001	-2.90736	0
	LOC4335495	4.19428	0	-2.52098	0	-1.64572	0
	LOC9267910	8.22574	0	-4.40345	0	-1.50753	0
	LOC4341971	2.53875	0	-2.34282	0	-2.28193	0
	LOC107277456	4.22091	0	-3.40006	0	-1.0933	0
	LOC4326920	4.8407	0	-2.09854	0	-1.07873	0
	LOC9269781	1.88588	0	-1.31374	0	-1.18423	0
	LOC4349149	1.90424	0	-1.04989	0	-1.00852	1e-05
	LOC4326919	2.44014	0	-1.23382	0	-2.13135	0
	LOC4329753	1.73671	7e-05	-3.08579	0	-1.41216	0.00078
	LOC4324194	1.4175	0	-2.59334	0	-4.55636	0
	LOC4336179	5.43715	0	-5.40771	0	-2.82719	0.00019
	LOC4340084	2.12551	0	-2.60337	0	-1.79141	0
	LOC4332300	3.2793	0	-3.43043	0	-1.58688	0
	LOC112936042	1.86907	0	-3.07124	0	-1.54857	0
	LOC4327448	1.77714	0	-2.17834	0	-1.61888	0
	LOC4342714	2.99903	0	-2.26915	0	-1.58172	1e-05
	LOC4332651	2.48471	0	-1.13334	0	-1.72274	0
	LOC4338611	3.47423	0	-4.03489	0	-1.56577	0
	LOC4351369	4.16953	0	-6.31002	0	-2.5331	0
	LOC4324829	2.80103	0	-2.78929	0	-1.28809	0
	LOC4326433	2.53422	0	-2.74055	0	-1.1222	0.0002
	LOC4332763	3.57409	0	-3.68215	0	-3.00852	0
	LOC4331044	1.43631	0	-3.23102	0	-2.14013	0
	LOC4339680	1.57436	0	-1.49429	0	-1.54936	0
	LOC4326394	3.23838	0	-1.36553	0	-1.28522	0
	LOC4337350	1.49109	0	-1.08006	0	-3.49852	0
	LOC107276042	4.89033	0	-2.00291	0	-3.86533	0
	LOC4346133	1.88571	0	-1.54535	0	-1.87909	0
	LOC4346124	2.12663	0	-1.79463	0	-1.00852	1e-05
	LOC4335417	4.01062	0	-6.98118	0	-3.40066	0
	LOC4325972	1.45083	0	-4.42139	0	-1.01208	0
	LOC4349097	2.69113	0	-1.91965	0	-1.66867	0
	LOC4339688	1.55073	0	-1.16514	0	-1.01984	0
	LOC4341509	4.55226	0	-5.77916	0	-1.3499	0
	LOC4345986	4.93419	0	-2.73482	0	-1.22255	0
	LOC4331633	7.93966	0	-6.91022	0	-2.91466	0
	LOC9268153	2.3411	0	-1.4408	0	-2.29985	0
	LOC9268232	4.89393	0	-3.78456	0	-1.00349	0
	LOC4339414	3.11031	0	-2.8376	0	-1.04754	0
	LOC9271949	4.71726	0	-4.10286	0	-1.23283	0.00086
	LOC4324903	3.80286	0	-1.7948	0	-1.5434	0
	LOC4348591	2.59095	0	-2.29499	0	-2.38907	0
	LOC4324706	7.45423	0	-6.42479	0	-2.03691	0
	LOC4325844	4.85219	0	-3.82275	0	-1.82719	0.00097
	LOC4352063	1.72631	0	-3.78093	0	-1.72879	0
	LOC4336441	3.89632	0	-2.53514	0	-1.02466	0
	LOC4335754	1.64164	0	-1.46536	0	-1.60088	0
	LOC4331928	5.58025	0	-3.20912	0	-1.85099	0
	LOC4323850	4.85219	0.00018	-3.82275	0.00063	-4.82719	0.00023
	LOC4324781	4.45234	0	-7.59283	0	-1.61999	0
	LOC9272590	1.67102	0	-1.77283	0	-3.4515	0
	LOC4334080	2.55729	0	-1.09175	3e-05	-1.71286	0
	LOC4331822	2.55087	0	-3.24841	0	-1.10334	0
	LOC4331422	2.29731	0	-1.17945	0	-1.87433	0
	LOC4346334	2.68265	0	-2.08994	0	-1.64693	0
	LOC4333492	4.50427	0	-4.47483	1e-05	-3.47927	2e-05
	LOC9271554	2.25658	0	-2.0292	0	-1.76446	0
	LOC4344094	3.5623	0	-4.70736	0	-1.17101	0
	LOC107275960	2.27083	0	-5.82635	0	-1.18694	0.00069
	LOC107276347	1.15175	3e-05	-5.40771	0	-4.82719	0
	LOC4336193	1.20842	0	-1.24338	0	-1.23689	0
	LOC4351985	8.35772	0	-2.42139	0	-1.37853	0
	LOC4331509	6.40239	0	-3.20302	0	-2.20747	0
	LOC4348342	4.62407	0	-8.57367	0	-3.80688	0
	LOC9266367	4.37874	0	-5.3493	0	-6.61677	0
	LOC9269739	3.45201	0	-1.66073	0	-1.52431	0
	LOC4344706	5.82994	0	-2.56346	0	-2.2029	0
	LOC4325285	2.92657	0	-1.09743	0	-1.35268	0
	LOC9269452	1.46406	0	-1.65143	0	-1.22147	0
	LOC9268702	6.81962	0	-4.08974	0	-4.09419	0
	LOC4325529	1.91317	0	-1.82547	0	-1.51027	0
	LOC4340732	4.30894	0	-1.83789	0	-1.07449	0
	LOC4338405	5.36677	1e-05	-5.33733	1e-05	-3.34177	8e-05
	LOC4334038	2.8687	0	-1.85385	0	-1.50444	0
	LOC4327803	1.7885	0	-2.72589	0	-5.18976	0
	LOC4323952	4.36677	0	-5.33733	0	-2.2543	0
	LOC4330637	3.04484	0	-1.84547	0	-1.6506	0
	LOC4330735	7.06721	0	-4.4528	0	-1.34177	5e-05
	LOC4336908	2.23336	0	-6.36654	0	-1.34659	0
	LOC4336546	2.56677	0	-2.45805	0	-1.51774	0
	LOC9270116	5.6298	0	-6.60036	0	-2.6048	0
	LOC4347650	3.89855	0	-2.4906	0	-4.47927	0
	LOC4340506	1.61188	0	-2.52997	0	-2.01984	0
	LOC4329752	1.8315	0	-1.26362	0	-1.54024	0
	LOC4336769	2.01682	0	-2.88047	0	-3.1073	0
	LOC4335647	2.58883	0	-1.15449	0	-5.52961	0
	LOC107277311	3.35915	0	-5.99268	0	-1.58208	0
	LOC4333118	4.23719	0	-3.64767	0	-3.92774	0
	LOC4352683	7.58972	0	-4.86429	0	-3.13578	0
	LOC4330152	1.99009	0	-2.33533	0	-1.12737	0
	LOC4345668	3.30118	0	-1.31238	1e-05	-1.35864	0
	LOC4339974	3.64475	0	-3.03035	0	-4.29782	0
	LOC4346219	6.29276	0	-3.45597	0	-1.31357	2e-05
	LOC4344575	1.5057	0	-1.17441	0	-1.94736	0
	LOC4328649	2.43257	0	-2.0812	0	-1.40757	0
	LOC107275740	4.06721	0	-3.33733	0	-1.31429	0
	LOC4337421	1.06615	0	-1.71843	0	-1.54473	0
	LOC4337704	1.52128	1e-05	-1.43043	3e-05	-1.62752	0
	LOC4331101	4.31766	0	-5.61015	0	-2.66474	0
	LOC4337342	2.58916	0	-2.82275	0	-1.82719	0.00021
	LOC4346394	1.80055	0	-1.10697	0	-1.10443	0
	LOC4333413	1.27005	0	-1.08417	0	-1.15117	0
	LOC4325015	4.95173	0	-5.92229	0	-4.92673	0
	LOC4326918	3.99903	0	-3.96959	0	-1.97403	0
	LOC4343690	2.33099	0	-1.85018	0	-1.92071	0
	LOC4345923	2.86165	0	-2.85452	0	-1.28717	0
	LOC4332595	1.2282	0	-4.16224	0	-2.36523	0
	LOC4340338	4.06316	0	-2.81368	0	-1.09672	0
	LOC9268371	3.00988	0	-4.21311	0	-1.50605	0
	LOC4348740	1.30264	0.00023	-2.33733	0	-6.8012	0
	LOC4331328	2.89422	0	-1.37291	0	-1.26392	0
	LOC107276351	1.05891	0	-1.10199	0	-1.42094	0
	LOC4325182	2.4295	0	-1.24806	0	-1.05087	6e-05
	LOC9270528	2.03393	0	-1.65843	0	-1.86041	0
	LOC4349359	7.34825	0	-7.31881	0	-1.28499	1e-05
	LOC4330777	2.19798	0	-2.16528	0	-1.69644	0
	LOC4348595	2.6374	0	-2.77471	0	-1.23467	0
	LOC4343297	1.44339	0	-1.38153	0	-1.92362	0
	LOC4343910	3.25129	0	-2.52997	0	-2.01984	0
	LOC4347102	1.29859	0	-1.1017	0	-1.711	0
	LOC107280424	6.85219	0	-3.50082	0	-2.01984	0
	LOC4325196	2.2079	0	-1.2544	0	-1.44593	0
	LOC107278159	3.85219	0	-4.23779	0	-1.24223	0.00043
	LOC4334140	5.74528	0	-2.13087	0.00049	-2.72028	4e-05
	LOC9271905	4.45987	0	-2.64616	0	-2.51734	0
	LOC4327532	4.7545	0	-1.0812	0	-2.6706	0
	LOC4329655	2.76366	0	-3.31918	0	-2.83177	0
	LOC4324802	2.3901	0	-3.42395	0	-1.36511	0
	LOC107278035	1.74281	0	-1.23944	0	-2.30277	0
	LOC4343574	1.04718	0	-1.84712	0	-1.53408	0
	LOC4345105	2.09741	0	-1.89804	0	-1.17759	0
	LOC4346234	3.83491	0	-1.39044	0	-2.93545	0
	LOC4327121	1.5601	0	-2.73092	0	-1.80191	0
	LOC107276596	2.97084	0	-1.0154	0.00058	-1.62391	0
	LOC4349648	2.58269	0	-3.68036	0	-1.43687	0
	LOC4342512	5.68869	0	-2.8519	0	-2.85634	0
	LOC4343432	2.90282	1e-05	-5.87338	0	-3.29286	0
	LOC9269394	7.04484	0	-2.31496	0	-1.52799	0
	LOC9269572	1.40239	0.0008	-2.05102	2e-05	-1.79243	7e-05
	LOC4346431	3.95173	0	-3.33733	0	-1.7568	0.00088
	LOC9270624	3.13135	0	-3.99268	0	-2.06638	0
	LOC4341515	5.97557	0	-7.94613	0	-3.36561	0
	LOC9268931	3.28188	0	-7.05979	0	-1.97677	0
	LOC4342096	2.4588	0	-1.64177	0	-1.58747	0
	LOC112936166	2.26723	0	-1.50082	0.0005	-2.41216	0
	LOC107281276	4.38384	0	-5.16175	0	-1.11816	0
	LOC107275962	4.40907	0	-3.37611	0	-6.41969	0
	LOC107280921	5.29276	1e-05	-5.26332	2e-05	-4.26777	3e-05
	LOC4337224	4.40239	0	-3.37295	0	-5.37739	0
	LOC107275769	3.66933	0	-1.48789	0	-1.29069	0
	LOC4335720	3.71159	0	-2.36023	0	-3.54909	0
	LOC4340513	3.2723	0	-2.09799	0	-3.09327	0
	LOC4347337	1.45318	0	-1.27174	0	-2.22371	0
	LOC107276410	4.32128	0	-3.00008	0	-4.15426	0
	LOC4325559	2.05196	0	-3.3889	0	-2.06358	0
	LOC4335455	1.59171	0	-2.41338	0	-1.04414	0
	LOC4326745	2.08647	0	-3.32789	0	-3.18346	0
	LOC4345814	3.14917	0	-4.44166	0	-5.4461	0
	LOC4346484	2.08923	6e-05	-3.05979	0	-3.47927	0
Log2FC(25°C vs 35°C)≤-1 Log2FC(35°C vs 35°C+STS)≥ 1 Log2FC(35°C vs 35°C+AOA)≥ 1 （32）	LOC4346253	-2.31362	0	3.07641	0	3.94979	0
	LOC4329031	-1.07446	0.00091	1.63442	0	3.65746	0
	LOC4326661	-1.15071	0.00019	1.31581	2e-05	6.98524	0
	LOC9266372	-1.51142	0	1.05417	0	1.18258	0
	LOC4343216	-2.45766	0	1.07771	5e-05	2.12493	0
	LOC4347994	-5.4441	0	2.13988	0	1.65001	0.00063
	LOC4332224	-1.975	0	1.44766	0	2.17211	0
	LOC4345205	-1.36103	0	3.04083	0	2.23263	0
	LOC4339480	-1.53477	0	2.55884	0	1.30849	0
	LOC4329175	-1.28394	0	1.16971	0	1.65393	0
	LOC4329454	-2.62717	0	2.10339	0	1.1902	0
	LOC4352487	-1.62476	0	1.47325	0	1.26556	0
	LOC112936027	-2.49432	0	4.5003	0	3.06762	0
	LOC4342716	-5.71219	0	6.51161	0	5.66722	0
	LOC4352488	-1.42114	0	1.29203	0	2.25069	0
	LOC4341337	-1.96675	0	1.50614	0	3.08125	0
	LOC4350344	-5.76252	0	4.79196	0.0003	10.3465	0
	LOC4347441	-2.7956	0	1.83168	0	3.07819	0
	LOC4346054	-2.92917	0	5.4452	0	3.2389	0
	LOC4346755	-3.1553	0	3.5348	0	3.7274	0
	LOC4345303	-1.11044	0	1.04873	0	1.65001	0
	LOC4349267	-1.71521	0	3.40545	0	3.33885	0
	LOC107279011	-1.55011	0	3.19243	0	2.16999	0
	LOC9266532	-1.73546	0	1.64942	0	1.75875	0
	LOC9268921	-7.32968	0	4.82154	0.00025	7.53045	0
	LOC107276550	-4.36845	0	2.96554	0	3.4749	0
	LOC4350063	-1.90725	0	1.45911	0	2.92944	0
	LOC4344843	-1.53058	0	1.16805	0	2.75454	0
	LOC4335672	-2.05752	0	2.38899	0	3.20558	0
	LOC4326025	-6.24056	0	4.56957	0.00097	4.98016	8e-05
	LOC4348440	-1.93092	0	1.8326	0	1.65823	5e-05
	LOC4351187	-2.43321	0	2.45736	0	1.02366	5e-05
Log2FC(25°C vs 35°C)≥ 1 Log2FC(35°C vs 35°C+STS)≥ 1 Log2FC(35°C vs 35°C+AOA)≥1 （31）	LOC4324077	1.22069	0	2.37579	0	2.55325	0
	LOC4343476	7.99775	0	1.60514	0	2.1852	0
	LOC4332654	1.54679	0	1.69235	0	1.36069	0
	LOC9272299	5.29276	1e-05	3.4646	0	1.37609	0.00035
	LOC4345003	2.7818	0.00025	1.92946	0	2.06762	0
	LOC4352915	2.91425	0	1.35726	0	3.11939	0
	LOC4335830	2.17412	2e-05	1.47003	0	3.04564	0
	LOC4341948	2.0042	0	1.56957	0	4.16376	0
	LOC107275748	2.51614	2e-05	3.079	0	1.32555	1e-05
	LOC4352168	1.56487	0	2.47665	0	1.19144	0
	LOC4352195	2.51614	2e-05	3.079	0	1.32555	1e-05
	LOC4346934	6.29276	0	4.19508	0	2.69224	0
	LOC107276974	1.22172	0.00069	1.68504	0	1.50854	0
	LOC4343553	2.29033	0.00035	2.54718	0	2.15205	0
	LOC4348974	1.48541	0.00075	2.95061	0	2.41333	0
	LOC4336520	1.5684	0.00011	1.29393	0	2.10765	0
	LOC9267218	1.60426	0	1.59088	0	1.83814	0
	LOC4327485	1.4711	0.00036	1.37852	0	2.30209	0
	LOC4333339	1.67459	0	2.15934	0	3.23043	0
	LOC4331574	2.32527	2e-05	1.18345	0.00012	1.62865	0
	LOC4344081	1.18234	0.00067	1.0106	3e-05	1.38863	0
	LOC4330867	4.1323	0	3.54039	0	1.47264	0
	LOC4327296	2.55941	0	1.6961	0	2.29123	0
	LOC4340413	1.91931	0.00016	1.62671	0	1.3952	0
	LOC4326683	2.25429	1e-05	1.16747	5e-05	1.12826	8e-05
	LOC4326671	1.94033	0	2.20811	0	1.74527	0
	LOC4350584	1.88134	0	1.87213	0	4.06423	0
	LOC9266984	2.00177	0	2.42402	0	1.79995	0
	LOC4339387	2.40741	0	1.96442	0	3.04386	0
	LOC107275574	4.30894	0	1.92576	0	3.12363	0
	LOC4347208	1.898	0	1.78827	0	1.72355	0
Log2FC(25°C vs 35°C)≥ 1 Log2FC(35°C vs 35°C+STS)≥1 Log2FC(35°C vs 35°C+AOA)≤ -1 （16）	LOC9272227	2.71459	0	1.80175	0	-1.91437	0
	LOC9267422	1.9001	0	1.27279	0	-2.65646	0
	LOC4352563	3.71654	0	1.89091	0	-1.46124	0
	LOC4347252	3.7078	0	2.45386	0	-1.94584	0
	LOC107276204	1.48094	0	3.23253	0	-7.12836	0
	LOC4332123	2.52561	0	2.20472	0	-1.83889	0
	LOC4338719	6.02212	0	2.34717	0	-3.99712	0
	LOC4337271	2.78734	0	1.20496	0	-1.00569	0
	LOC4342725	1.93792	0.00077	2.20303	0	-5.72028	0
	LOC4343425	2.25074	0	2.43171	0	-2.19332	0
	LOC107275722	2.83491	0	2.08124	0	-7.39488	0
	LOC9271549	1.72732	0	1.14928	0	-1.70232	0
	LOC4344780	1.51805	0	1.51363	0	-1.59515	0
	LOC107278246	1.15081	0	1.98153	0	-1.35408	0
	LOC4345716	1.078	6e-05	1.81519	0	-1.83541	0
	LOC4327611	2.1711	0	2.28706	0	-2.04422	0
Log2FC(25°C vs 35°C)≤ -1 Log2FC(35°C vs 35°C+STS)≤ -1 Log2FC(35°C vs 35°C+AOA)≤ -1 （13）	LOC4341168	-2.44085	0	-1.2872	0	-1.11004	0
	LOC4337187	-2.67443	0	-3.37295	0	-3.37739	0
	LOC4340179	-1.66788	1e-05	-5.18532	3e-05	-2.6048	0.00098
	LOC4341933	-1.40462	0	-1.20601	0	-2.68039	0
	LOC4344615	-1.01859	0	-1.32121	0	-1.68822	0
	LOC4342528	-1.05253	0	-1.46996	0	-2.03289	0
	LOC9270041	-1.35872	0	-1.30013	0	-1.21556	0
	LOC4344277	-1.27518	0	-1.04714	0	-2.37211	0
	LOC4351855	-1.80527	0	-2.0934	3e-05	-3.26777	0
	LOC4329169	-1.50439	0	-1.05566	2e-05	-1.26446	0
	LOC4325537	-1.09509	0	-1.24672	0.00062	-2.96737	0
	LOC107278669	-2.10491	0	-5.0154	9e-05	-5.01984	7e-05
	LOC4334054	-2.13959	0	-4.05979	0	-2.7423	0
Log2FC(25°C vs 35°C)≤ -1 Log2FC(35°C vs 35°C+STS)≤ -1 Log2FC(35°C vs 35°C+AOA)≥ 1 （14）	LOC4348520	-1.91944	0	-1.36903	0	1.53342	0
	LOC4338307	-1.70012	0	-1.60036	3e-05	2.67236	0
	LOC4350605	-1.00876	0	-1.0562	0	1.15837	0
	LOC9269224	-1.0547	0	-1.96026	0	2.25253	0
	LOC4333359	-2.29755	0	-5.82275	0	4.68258	0
	LOC4339833	-1.95516	0	-5.0154	9e-05	5.75824	0
	LOC4335090	-1.86943	0	-2.71584	5e-05	2.62845	0
	LOC4344439	-1.79166	0	-4.40771	1e-05	5.07367	0
	LOC4331584	-2.81812	0	-1.02171	0	1.12961	0
	LOC4328109	-1.60136	0	-1.67251	0	2.10104	0
	LOC4324479	-1.52345	0	-5.87338	0	5.93756	0
	LOC4335091	-1.39257	3e-05	-3.60036	1e-05	2.62402	0
	LOC4330873	-1.79222	0	-2.7175	5e-05	2.53959	0
	LOC4330149	-1.02263	0	-2.98502	0	1.8392	0
Log2FC(25°C vs 35°C)≤ -1 Log2FC(35°C vs 35°C+STS)≥ 1 Log2FC(35°C vs 35°C+AOA)≤ -1 （110）	LOC4341378	-1.12659	0	2.43049	0	-1.06087	2e-05
	LOC107275525	-1.46859	0	1.57863	0	-3.7268	0
	LOC4327928	-1.66747	0	1.71421	0	-2.787	0
	LOC4339030	-1.27072	0	1.40281	0	-2.47715	0
	LOC4334049	-2.61337	0	1.09501	0	-3.97843	0
	LOC4324833	-1.18822	0	1.3973	0	-3.70166	0
	LOC4349326	-4.81488	0	2.62307	0	-1.45863	0
	LOC4348005	-1.45013	0	1.46368	0	-2.41158	0
	LOC4342633	-1.58547	0	1.63609	0	-1.53373	0
	LOC4348392	-1.51628	0	2.31125	0	-2.49114	0
	LOC4330124	-2.53404	0	1.50753	0	-1.81631	0
	LOC107275733	-1.18749	0	1.0153	0	-1.62826	0
	LOC4334917	-1.77575	0	4.30634	0	-1.54777	0
	LOC4337864	-1.24693	7e-05	1.55289	0	-5.87782	0
	LOC4335068	-1.37267	0	3.01878	0	-2.6247	0
	LOC107276243	-1.3222	0	1.30153	0	-2.31035	0
	LOC107275710	-2.04441	0	1.3547	0	-1.90148	0
	LOC107277338	-2.77785	0	1.05962	8e-05	-3.04757	0
	LOC4328617	-1.75984	0	1.79463	0	-4.28662	0
	LOC107277832	-1.27329	0	1.51967	0	-2.07794	0
	LOC107276467	-1.13341	0	1.80122	0	-2.3748	0
	LOC107275668	-1.1712	0	2.03905	0	-1.95474	0
	LOC107276424	-2.11141	0	1.30809	0	-4.88269	0
	LOC4349505	-1.12135	0	1.35168	0	-1.83676	0
	LOC4326529	-1.36068	0	2.49601	0	-2.5308	0
	LOC107277760	-1.22535	0	1.2773	0	-3.10991	0
	LOC4330114	-1.92973	0	1.69956	0	-2.84167	0
	LOC4328714	-2.14451	0	2.59859	0	-1.91796	3e-05
	LOC4348240	-1.64297	0	1.15271	0	-3.06551	0
	LOC107276086	-1.25778	0	1.8756	0	-1.3125	0.00018
	LOC107275928	-1.28394	0	1.94984	0	-2.57085	0
	LOC4344049	-1.37021	0	1.83862	0	-2.24318	0
	LOC107276154	-1.30346	0	1.15194	0	-3.20676	0
	LOC4335448	-1.19641	0	3.23339	0	-5.33456	0
	LOC107276712	-1.51124	0	1.66511	0	-2.05937	0
	LOC9267350	-1.26405	0	4.57579	0	-2.58005	0
	LOC107277064	-1.10733	0	1.59303	0	-2.71402	0
	LOC4338911	-1.19939	0	1.38852	0	-1.9986	0
	LOC107277016	-1.35477	0	1.76986	0	-1.48696	0.00021
	LOC4334172	-1.94316	0	1.27266	0	-2.71233	0
	LOC4346744	-1.00722	0	1.5707	0	-1.28144	0
	LOC4329019	-1.36532	0	1.63892	0	-3.44968	0
	LOC4338696	-2.19126	0	1.39341	0	-2.87782	0
	LOC4326900	-1.44564	0	1.12438	0	-1.60038	0
	LOC4335443	-1.23122	0	3.06	0	-6.23448	0
	LOC4349875	-1.07979	0	1.69253	0	-2.61569	0
	LOC107277403	-1.67793	0	1.01814	0	-3.51731	0
	LOC107281820	-1.06479	0	1.8326	0	-1.73171	0
	LOC112936477	-2.2962	0	4.19665	0	-3.92673	0.00029
	LOC107278908	-2.12593	0	1.85115	0	-2.64307	0
	LOC4338125	-1.08895	0	1.44542	0	-3.30652	0
	LOC4327092	-1.70789	0	2.10264	0	-2.16906	0
	LOC107280797	-1.95878	0	1.53351	0	-2.72757	0
	LOC9267807	-1.95989	0	4.49473	0	-3.81307	0
	LOC4335471	-1.35255	0	2.00609	0	-1.18369	0
	LOC4332630	-1.02144	0	1.58862	0	-1.58035	0
	LOC4334670	-1.20677	0	2.00546	0	-2.61888	0
	LOC112936645	-1.84126	0	1.87654	0	-3.0905	8e-05
	LOC4343233	-1.19796	0	1.01266	0	-1.59756	0
	LOC4326483	-2.10811	0	2.47138	0	-1.80833	0.00012
	LOC4349325	-4.43571	0	1.00397	0.00077	-3.64433	0
	LOC4342010	-1.03042	0	1.10117	0	-1.36963	0
	LOC4342188	-1.13205	0	1.68671	0	-2.68173	0
	LOC4347978	-1.92551	0	1.55177	0	-3.11999	0
	LOC4335442	-1.26405	0	4.57579	0	-2.58005	0
	LOC107276830	-1.00908	0	1.31415	0	-2.40026	0
	LOC9271812	-1.35658	0	1.60797	0	-1.83976	0
	LOC107281163	-1.1602	0	1.61033	0	-1.78537	0
	LOC4349238	-1.20287	0	1.14075	0	-1.81396	0
	LOC9266717	-1.05919	0	1.91556	0	-2.23774	0
	LOC4337251	-1.61121	0	2.17861	0	-4.06423	0
	LOC107276425	-2.11141	0	1.30809	0	-4.88269	0
	LOC4330951	-1.00827	0	1.92547	0	-2.75081	0
	LOC107276591	-1.63659	0	1.70812	0	-1.61825	0
	LOC4326933	-2.22359	0	1.87169	0	-1.04932	0
	LOC4351585	-1.15314	0	1.73244	0	-2.24673	0
	LOC4344050	-1.63111	0	2.13058	0	-2.28138	0
	LOC4341941	-1.15505	0	1.85988	0	-2.86338	0
	LOC107277691	-1.08512	0	1.48942	0	-2.62065	0
	LOC107276120	-2.3221	0	1.43844	0	-2.87399	0
	LOC107278715	-1.3821	0	2.87282	0	-2.94823	0
	LOC107275335	-1.89366	0	1.40369	0	-3.19569	0
	LOC4327363	-1.05713	0	1.54877	0	-1.84184	0
	LOC112938796	-1.04928	0	3.0863	0	-1.97201	0
	LOC4326385	-1.22383	0	1.5795	0	-1.76494	0
	LOC9271691	-1.41232	0	1.26245	0	-1.50105	0
	LOC4334707	-2.42652	0	1.5081	0	-4.2449	0
	LOC4332020	-1.31344	0	1.16177	0	-2.07429	0
	LOC4329018	-1.43326	0	2.24374	0	-2.68089	0
	LOC9266280	-2.15156	0	2.12756	0	-3.11937	0
	LOC4336623	-1.48665	0	1.48309	0	-1.89862	0
	LOC4337728	-1.8674	0	1.38789	0	-1.53051	0
	LOC4343240	-1.44361	0	1.70132	0	-2.70993	0
	LOC4340037	-1.03203	0	1.01294	0	-1.78749	0
	LOC4336129	-1.2975	0	1.38365	0	-1.21781	0
	LOC4344048	-1.86655	0	2.4707	0	-1.76801	0
	LOC107276810	-1.26283	0	1.62372	0	-2.09259	0
	LOC107276116	-2.17732	0	1.92306	0	-2.38474	0
	LOC107275496	-1.85935	0	1.42685	0	-2.80299	0
	LOC107276688	-2.0314	0	1.56102	0	-1.70914	0
	LOC4352821	-1.25493	0	1.23355	0	-1.84346	0
	LOC4350734	-1.80483	0	1.98084	0	-1.6506	0
	LOC4325989	-1.07478	0	1.73176	0	-3.73337	0
	LOC4324276	-1.052	0	1.57929	0	-3.46138	0
	LOC4337384	-1.21704	0	1.93095	0	-2.26672	0
	LOC4335345	-1.51906	0	1.58516	0	-1.95844	0
	LOC4340940	-1.37636	0	1.8572	0	-2.96852	0
	LOC4342070	-1.13861	0	1.60181	0	-1.46508	0
	LOC107275974	-3.53389	0	1.9404	0	-4.29286	0
	LOC107275519	-2.12833	0	1.31955	0	-3.05689	0
Log2FC(25°C vs 35°C)≥ 1 Log2FC(35°C vs 35°C+STS)≤ -1 Log2FC(35°C vs 35°C+AOA)≥ 1 （187）	LOC4345831	2.32777	0	-1.0154	0	2.17186	0
	LOC4326219	2.53026	0	-1.91586	0	1.11532	0
	LOC112935992	2.04484	0	-1.25641	0.00074	1.68911	0
	LOC4339251	1.19684	0	-1.43043	0	2.89117	0
	LOC4337154	4.92748	0	-3.57611	0	1.10875	0
	LOC9266682	6.29276	0	-2.26332	1e-05	5.36068	0
	LOC4325695	2.29616	0	-1.6746	0	1.05721	0
	LOC9267761	3.15336	0	-1.7316	0	1.15704	0
	LOC4324898	1.60555	1e-05	-3.09069	0	1.16361	0
	LOC4348157	2.03601	0	-1.27666	0	1.26806	0
	LOC4331897	2.11523	0	-2.1347	0	1.02894	0
	LOC4324993	1.78715	0	-1.12146	0	1.83205	0
	LOC4347545	4.03421	0	-2.9999	0	2.14273	0
	LOC112936094	1.53888	0	-1.77137	0	2.32963	0
	LOC4339080	4.01356	0	-1.9931	0	3.5834	0
	LOC4336584	2.53774	0	-1.05672	0	1.46906	0
	LOC4350562	4.39735	0	-1.42038	0	1.23392	0
	LOC4332893	2.12284	0	-1.0934	0.00024	1.00836	0
	LOC4337892	3.60138	0	-1.83191	0	1.54145	0
	LOC4352930	2.73384	0	-1.37845	0	1.23923	0
	LOC4348200	1.48844	1e-05	-2.19597	0	2.1167	0
	LOC4328706	4.94484	0	-1.33044	0	1.02769	0
	LOC4330372	4.82725	0	-1.49915	0	1.9505	0
	LOC4326694	1.77149	0	-1.02844	0	2.62404	0
	LOC4340040	4.68869	0	-2.65925	9e-05	1.35867	5e-05
	LOC9269286	1.65918	0	-2.60036	0	2.52515	0
	LOC4347137	1.67287	0.0005	-1.64343	0.00085	2.25902	0
	LOC4324196	2.14437	0.00011	-3.92229	0	2.09564	0
	LOC4340391	1.08791	0.0004	-1.64343	0	2.5966	0
	LOC107277281	1.75853	0	-1.61806	0	1.2188	0
	LOC4349819	2.04763	0	-1.46615	0	2.38325	0
	LOC4339684	5.57287	0	-3.95847	0	1.98351	0
	LOC4325851	2.69691	0	-1.47483	0	1.17894	0
	LOC4333370	2.34601	0	-1.66449	0	2.98798	0
	LOC4349948	2.596	0	-1.85983	0	1.48014	0
	LOC9268618	3.35858	0	-2.32914	0	1.45223	0
	LOC4352143	2.34806	0	-1.40625	0	1.88899	0
	LOC4330161	5.56751	0	-2.0432	0	1.17833	0
	LOC4334300	1.35065	0	-3.32121	0	3.28579	0
	LOC4338052	1.83362	0	-1.05009	0	1.06193	0
	LOC4335599	1.05158	0	-1.45591	0	1.4674	0
	LOC4326679	2.55815	0	-1.2755	0	1.73581	0
	LOC4328717	1.90493	0	-1.52333	3e-05	3.19401	0
	LOC4343032	5.45987	0	-1.20804	0	4.8848	0
	LOC4332455	1.19486	0	-2.39298	0	3.00977	0
	LOC4326409	3.70254	0	-2.50235	0	1.43452	0
	LOC4324929	4.90282	0	-2.70345	0	3.70526	0
	LOC9266898	1.62198	0	-1.54086	0	1.09726	0
	LOC4338777	1.29334	0	-1.29127	0	1.35234	0
	LOC4350204	1.94963	0	-1.06242	0	2.49105	0
	LOC4342650	4.5684	0	-2.03646	0	4.3372	0
	LOC4327543	1.94666	0	-2.25825	0	2.62158	0
	LOC9267893	2.97895	0	-3.43494	0	1.16943	0
	BGIG39947_32158	3.62879	0	-1.95762	0	1.44673	0
	LOC4326487	4.32168	0	-5.40771	0	1.42073	0
	LOC4328590	4.42731	0	-3.50478	0	1.10322	0
	LOC4324548	3.11809	0	-1.28129	0	1.00143	0
	LOC9269701	2.34601	0	-1.31657	5e-05	1.21149	0
	LOC4327305	1.66777	0	-1.61685	0	1.00685	0
	LOC4334100	1.48372	0	-1.16478	0	1.72185	0
	LOC4341766	2.77523	0	-2.29833	0	1.72992	0
	LOC4347971	2.6298	0	-1.30397	0	1.35021	0
	LOC9272382	3.0932	0	-1.569	0	1.08708	0
	LOC4332456	4.13396	0	-1.63488	0	4.0615	0
	LOC4324655	1.77481	0	-1.94113	0	2.04723	0
	LOC107279834	5.64356	0	-5.61412	0	3.06268	0
	LOC4334316	2.01523	1e-05	-1.58809	0.00033	2.11193	0
	LOC4332400	3.02669	0	-2.83375	0	1.7649	0
	LOC9266540	1.41942	0	-1.81784	0	1.14954	0
	LOC4345044	2.76772	0	-4.37752	0	3.45046	0
	LOC4328664	1.31664	0	-1.00451	0	1.35643	0
	LOC4326667	3.36677	0	-2.35503	0	1.96602	0
	LOC4344024	3.31692	0	-1.37696	0	1.42983	0
	LOC9269614	6.79981	0	-1.74632	0	2.38152	0
	LOC4324026	1.67489	0	-1.43785	0	1.1962	0
	LOC4336438	2.12825	0	-2.0317	0	3.03776	0
	LOC4348175	2.12013	0	-1.03846	0	2.02386	0
	LOC4326792	1.32495	0	-1.06037	0	1.10976	0
	LOC4349188	1.6866	0	-1.11375	0	1.7274	0
	LOC4349647	1.09668	0	-3.07429	0	2.99368	0
	LOC4337388	2.34673	0	-1.53141	0	1.20831	0
	LOC112939608	2.7078	0	-2.46978	0	1.09681	0
	LOC4332353	1.79206	0	-1.45262	0	1.04128	0
	LOC4326840	1.45126	0	-1.84451	0	1.22217	0
	LOC4329439	1.31419	0	-1.87732	0	1.34063	0
	LOC4329576	2.54734	0	-2.5179	1e-05	1.12152	0.00018
	LOC4331102	4.85219	0	-3.82275	0	3.79388	0
	LOC4337645	5.5438	0	-4.29197	0	1.46609	0
	LOC4326774	3.06572	0	-1.73372	0	1.57888	0
	LOC4325465	3.04484	0	-1.83483	0	1.39068	0
	LOC4349004	1.13999	1e-05	-2.40006	0	3.30516	0
	LOC4337097	2.61612	0	-1.34882	0	1.44417	0
	LOC4347593	5.49597	0	-3.73518	0	2.14131	0
	LOC4350148	6.81302	0	-1.08314	0	1.65492	0
	LOC4342382	1.50951	0	-2.21703	0	1.55112	0
	LOC4332926	4.18913	0	-1.41594	0	1.04016	0
	LOC4326790	3.50427	2e-05	-2.88987	0.00013	1.27562	0.00046
	LOC4344679	6.8262	0	-2.70929	0	4.7253	0
	LOC107281285	2.5813	0	-1.8149	0.00028	1.04598	0.00052
	LOC4325338	7.02212	0	-3.90521	0	1.28828	0
	LOC4347942	1.21917	0	-3.37295	0	4.90473	0
	LOC4333617	1.15648	0	-1.71201	0	1.01429	0
	LOC4347224	1.50009	0	-3.19476	0	2.31311	0
	LOC9267045	7.10866	0	-3.64493	0	1.8429	0
	LOC4323896	1.15348	0	-1.61917	0	2.62969	0
	LOC4325642	2.12521	0	-1.30569	0	1.90354	0
	LOC4327006	3.79976	0	-1.51793	0	1.10761	0
	LOC107275738	2.39607	0	-2.87359	0	1.87897	0
	LOC4349443	1.08418	0	-1.00029	0	2.94688	0
	LOC4323880	6.30693	0	-3.3706	0	4.465	0
	LOC4332482	2.83454	0	-2.47705	0	1.02173	0
	LOC4327905	1.70195	0.0001	-2.20302	1e-05	3.41051	0
	LOC4335176	2.1857	0	-1.20008	0	2.67586	0
	LOC4343219	2.08586	0	-1.94951	0	2.06524	0
	LOC4344046	3.77557	0	-1.78393	0	2.94763	0
	LOC4334958	1.1069	0	-1.1609	0	1.12013	0
	LOC4326728	4.04008	0	-2.83231	0	1.71427	0
	LOC4329514	3.95645	0	-1.65808	0	1.63417	0
	LOC4341321	1.54167	0	-1.19673	0	2.08159	0
	LOC4339389	4.66933	0	-3.90292	0	3.54055	0
	LOC4350217	6.74528	0	-1.25641	0.00074	2.18661	0
	LOC4351987	2.87081	0	-1.17152	8e-05	1.58958	0
	LOC4333209	6.97557	0	-1.3672	0	1.16004	0
	LOC4332603	1.584	0	-4.23263	0	3.15696	0
	LOC4330626	4.62619	0	-5.59675	0	3.16739	0
	LOC4343515	1.34683	0	-3.377	0	3.63257	0
	LOC4324166	2.69673	0	-1.56614	0	1.84867	0
	LOC4349754	3.52961	0	-4.02526	0	2.13435	0
	LOC9268627	3.02212	0	-2.18532	0	1.12182	0
	LOC4349185	3.92321	0	-1.32231	0	3.2977	0
	LOC107278104	3.41407	0	-2.62761	1e-05	1.45223	0
	LOC4346391	2.26723	0	-1.53735	0	2.1596	0
	LOC9269478	1.26207	0	-1.01318	0	1.18728	0
	LOC4348840	4.23613	0	-2.97016	0	1.17297	0
	LOC4349795	1.97847	0	-8.87892	0	1.24831	0
	LOC4346877	4.87773	0	-1.32473	0	5.13193	0
	LOC4335774	1.09929	0	-3.77028	0	1.63183	0
	LOC107277669	2.33087	0	-2.63243	0	1.24631	0
	LOC4344545	1.2843	1e-05	-1.90123	0	2.01785	0
	LOC4326569	1.28398	0	-1.25152	0	1.28819	0
	LOC9272063	2.18234	0	-3.05979	0	2.36203	0
	LOC4345787	2.38754	0	-1.23436	0	1.86721	0
	LOC4347661	3.85219	0.00042	-3.82275	0.00063	2.28133	0
	LOC4330396	1.30787	0	-1.15979	5e-05	1.74266	0
	LOC4352123	2.58089	2e-05	-3.28842	0	1.64574	0
	LOC4349111	2.66247	0	-1.17913	0.00057	4.00429	0
	LOC4341908	2.44339	0	-1.14546	0	1.29711	0
	LOC4331303	3.37684	0	-6.76694	0	1.90634	0
	LOC4325643	4.52117	0	-2.26934	0	3.35511	0
	LOC4329156	1.40389	0	-1.22384	0	2.14293	0
	LOC4330612	3.11768	0	-2.95073	0	2.82857	0
	LOC4349271	1.32105	0	-1.23961	0	1.05989	0
	LOC4342322	6.25429	0	-2.90292	0	1.26256	1e-05
	LOC4324570	4.73134	0	-2.04655	0	3.44848	0
	LOC4323945	2.06534	0	-1.12702	0	1.86251	0
	LOC4328331	1.36034	0	-1.39649	0	2.47887	0
	LOC107277113	2.90991	0	-2.68782	0	1.42668	0
	LOC4342380	7.56054	0	-2.40181	0	1.83733	0
	LOC4339237	3.60708	0	-2.57764	0	1.47591	0
	LOC4347854	1.71898	0	-1.59252	0	1.34164	0
	LOC4344022	6.33024	0	-5.3008	0	1.66054	0
	LOC4332385	1.9654	0	-1.42139	0.00016	1.21803	0
	LOC4341930	1.30787	2e-05	-2.48488	0	1.19394	0
	LOC4347941	1.90059	0	-1.16245	0	1.33619	0
	LOC4334513	1.45987	0.00018	-2.14093	0	1.21538	0
	LOC4340120	3.06474	0	-2.11776	0	1.60412	0
	LOC4332377	1.46737	0	-2.21554	0	2.5886	0
	LOC4336156	2.39399	0	-1.58694	0	1.04605	0
	LOC4346326	1.1289	0	-1.57339	0	2.81448	0
	LOC4332160	3.10897	0	-1.29103	0	3.45237	0
	LOC4324940	1.77985	0	-1.39592	0	1.6826	0
	LOC4327025	2.50427	1e-05	-1.73786	0.00062	1.4115	0
	LOC4339380	1.09408	0	-2.42721	0	1.89798	0
	LOC4328820	2.34089	0	-1.18859	0	1.09915	0
	LOC4339560	1.87266	0	-1.03586	0.00073	1.37731	0
	LOC9270232	1.79207	2e-05	-1.48252	0.00026	1.28355	0
	LOC4332503	3.5784	0	-1.43793	0	1.11789	0
	LOC4332319	1.53642	0	-1.77001	0	1.16367	0
	LOC4347977	5.27252	0	-1.25857	0	1.1046	0
	LOC4326149	2.23866	0	-4.65925	0	2.51941	0
	LOC4333263	1.14287	0	-1.58987	0	1.09158	0
	LOC9272427	2.98344	0	-1.29103	0	1.9723	0
	LOC4347742	1.11118	0	-1.96757	0	1.17685	0
	LOC4331935	1.15452	0	-1.62562	0	1.84482	0
	LOC4341603	3.6298	0	-1.11493	0.001	1.48266	0
	LOC107278422	2.92361	0	-1.41418	0	1.53206	0
	LOC4333459	4.36696	0	-3.74284	0	2.41127	0
Note: DEGs in line 3-374 are used in the WGCNA analysis.

## Sheet: Table S5
Table S5. Expression profiles of 372 DEGs for WGCNA
Gene Symbol	fpkm 25°C 1	fpkm 25°C 2	fpkm 25°C 3	fpkm 35°C 1	fpkm 35°C 2	fpkm 35°C 3	fpkm 35°C+STS 1	fpkm 35°C+STS 2	fpkm 35°C+STS 3	fpkm 35°C+AOA 1	fpkm 35°C+AOA 2	fpkm 35°C+AOA 3
LOC4334864	0.06	0.12	0.06	0.59	0.8	1.35	0.12	0	0.12	0.24	0.36	0.35
LOC4336794	0.87	0.46	0.87	4.04	7.2	6.48	1.97	2.58	2.35	1.33	0.94	0.76
LOC107276247	0.98	1.95	1.15	8.7	18.03	13.5	3.24	3.25	3.31	3.46	3.54	2.85
LOC107281879	3.05	3.5	3.23	9.48	11.4	6.11	2.89	4.66	3.09	2.4	1.92	1.78
LOC4347069	0.09	0.09	0	0.55	0.13	1.16	0	0	0.13	0.22	0.17	0.17
LOC107278166	0.34	0.47	0.45	1.75	1.26	1.15	0.43	0.5	0.27	0.54	0.43	0.8
LOC107277012	1.72	3.83	1.06	85.58	171.48	105.57	52.77	48.08	34.52	18.43	19.27	11.04
LOC4336798	0.46	0.4	0.46	3.98	1.71	2.9	0.85	1.63	0.64	1.08	0.67	0.98
LOC9267999	2.47	4.22	1.19	44.57	57.74	49.02	1.91	2.87	2.92	8.15	11.37	5.03
LOC4329093	29.17	28.83	14.1	54.27	124.04	97.58	16.75	18.59	17.81	47.42	28.76	39.64
LOC107278411	0.23	0	0.22	2.76	8.84	3.92	1.04	1.11	1.53	2.78	2.45	1.93
LOC4339068	0.52	0.54	0.43	1.09	0.03	4.88	0	0	0	0	0	0
LOC4342063	0.27	0	0	3.64	3.65	4.36	0.53	0.57	0.76	1.53	0.67	0.74
LOC107278774	0.41	0.5	0.23	1.49	3.35	2.22	1.37	0.83	0.73	1.47	0.97	0.95
LOC4347408	3.54	4.02	5.17	16.43	0.76	12.63	2.82	3.12	2.45	2.85	2.16	1.16
LOC4336857	0	0	0.04	0.33	0.93	0.82	0.11	0.23	0.15	0	0	0
LOC4335993	1.63	0.84	1.12	5.59	4.23	5.47	0.77	1.07	1.06	1.49	2.51	2.6
LOC4331886	0.82	0.88	0.55	1.34	2.69	2.61	0.66	0.6	0.89	0.79	0.5	0.46
LOC9272330	0.04	0	0	0.21	0.27	0.22	0	0	0	0	0	0
LOC4346153	0	0.04	0	0.53	1.27	0.82	0	0	0	0	0	0.33
LOC107277982	0.47	0.6	0.2	2.26	3.34	3.04	0.07	0	0.13	0.67	0.14	0.2
LOC107276173	1.46	1.42	1.25	5.05	6.63	4.54	0.85	1.34	2.03	2.51	2.76	2.34
LOC4352439	2.48	3.44	4.38	11.6	2.51	18.39	3.95	3.8	3.48	2.37	3.05	1.97
LOC4340754	0.23	0.16	0.03	1.63	1.2	1.78	0.33	0.47	0.26	0.36	0.3	0.13
LOC9270308	7.04	12.61	2.57	100.84	59.67	68.18	0.2	0.34	0.48	3.96	4.22	5.08
LOC9267428	0.31	0	0.1	2.1	0	4.39	0.2	0.31	0.51	0.61	0.41	0.2
LOC107275256	0	0.19	0.22	0.79	0.1	0.37	0	0.17	0	0.1	0.11	0.11
LOC107276957	0.23	0.34	0	1.99	1.54	2.38	0	0.12	0.06	0.4	0.87	0.91
LOC9270078	1.33	0.78	1.25	2.49	3.26	2.32	1.46	0.83	1.45	1.22	1.39	1.13
LOC4327887	1.86	1.89	1.97	4.75	6.5	6.69	1.98	1.78	1.48	2.72	2.02	2.15
LOC4332378	0	0.06	0	0.84	0	1.77	0	0	0	0.03	0	0
LOC4329486	0.09	0	0	0.16	0.65	0.27	0.05	0.16	0.07	0.18	0.09	0.11
LOC4334907	41.76	40.63	40.87	71.74	128.25	99.59	40.13	30.98	27.26	29.82	17.1	19.53
LOC4324822	2.46	3.02	2.79	7.12	6.02	9.19	2.62	2.9	3.33	1.49	1.58	2.04
LOC4348094	0.15	0.21	0.1	0.9	0.81	0.5	0	0.05	0.03	0.03	0	0
LOC4348382	0	0	0	0.75	0.78	1.15	0.32	0	0.11	0	0	0
LOC4346220	0.25	0.15	0	1.93	0	4.21	0	0	0.05	0.7	1.11	0.1
LOC4346292	17.29	21.07	6.61	83.13	109.38	96.3	3.52	3.71	4.28	37.03	30.14	34.05
LOC4332778	17.41	18.66	16.16	46.42	47.55	37.97	19.86	16.96	15.19	21.39	19.96	19.25
LOC4345748	0.12	0.26	0.16	0.92	1.5	1.23	0.75	0.67	0.31	0.41	0.39	0.44
LOC4324213	5.63	7.48	1.4	38.5	45.74	43.29	0.13	0.06	0	15.37	7.08	11.13
LOC9268985	0	0	0.04	0.16	0.04	0.59	0.08	0	0	0	0	0.04
LOC4326048	0.03	0	0.07	0.65	0.57	0.62	0.17	0.17	0.07	0.1	0.24	0.17
LOC4345703	1.5	1.48	2.3	5.23	9.12	4.67	3.61	2.84	2.24	2.64	1.85	1.64
LOC4338958	0.17	0.51	0.28	2.58	0.23	8.25	1.19	1.38	1.14	1.42	0.92	1.02
LOC4325571	0.93	0.44	0.44	1.14	0.34	2.33	0.27	0.39	0.33	0.11	0.22	0.27
LOC4329013	0.04	0.08	0.06	0.27	0.69	0.22	0.04	0.12	0.06	0.1	0.06	0.06
LOC4331336	0.08	0.18	0.05	2.31	1.98	2.58	0.42	0.11	0.19	0.34	0.07	0.27
LOC9268839	2.19	2.67	2.58	11.37	1.23	5.4	0.43	0.92	0.38	1.67	3.9	2.6
LOC4334834	0	0	0	1.07	1.7	1.56	0	0	0.01	0.22	0.23	0.08
LOC4348341	0.75	1.01	0.13	120.18	70.26	60.89	0.24	0.07	0.08	0.88	0.51	1.01
LOC107278602	0.05	0.1	0.1	0.36	0.52	0.27	0.1	0.17	0.12	0.12	0.17	0.12
LOC4337274	21.81	33.42	8.06	92.86	77.36	86.48	0.45	0.65	0.52	11.62	6.67	22.16
LOC4336108	1.36	1.29	1.13	10.88	10.07	14.76	2.01	3.13	1.52	5.24	6.29	6.21
LOC9269462	0.4	0.35	0.37	1.34	0.86	1.45	0.47	0.86	0.56	0.65	0.35	0.81
LOC4341170	0.33	0.39	0.28	1.96	1.98	1.78	0.91	0.39	0.24	0.05	0.25	0
LOC4347412	2.76	1.97	2.1	7.68	2.7	8.44	2.18	2.21	1.7	2.9	3.01	1.47
LOC4326826	0.79	1.16	0.19	2	2.04	2.61	0.99	0.9	1.13	1.36	0.47	1.17
LOC4333060	5.55	7.01	4.74	65.89	68.18	49.96	19.4	33.98	24.77	28.62	30.59	32.49
LOC4351721	1.72	1.33	2.08	3.11	1.36	10.58	2.28	2	2.4	1.9	2.71	0.97
LOC4324330	0	0.35	0.1	5.36	14.02	12.24	0.35	1.02	0.35	4.26	3.53	2.87
LOC4344505	0	0	0	0.93	0.78	1	0	0	0	0	0	0
LOC4332896	0.52	1.04	0.5	2.77	0.63	2.1	0.25	0.44	0.6	0.42	0.38	0.43
LOC4326946	4.21	4.77	3.49	5.5	11.29	9.11	4.68	4.21	3.32	1.64	1.41	1.43
LOC4347919	16.1	16.73	16.79	49.02	44.46	58.89	18.37	25.52	14.69	11.76	16.03	14.41
LOC9268653	0.65	0.68	0.43	3.23	2.83	3.65	1.41	1.91	1.27	0.75	1.35	0.9
LOC4341299	0	0.16	0.31	0.68	0.81	1.14	0.32	0.11	0.16	0.47	0.32	0.21
LOC107277149	6.76	7.35	10.19	20.6	15.99	26.44	7.98	9.05	7.4	5.9	4.08	7.25
LOC9266825	0	0	0	0.33	0	0.26	0	0.03	0	0	0.03	0
LOC9267997	0.05	0	0.07	0.16	0.02	2.27	0.19	0.37	0.39	0.55	0.02	0.09
LOC4338619	0	0.11	0	3.52	4.25	2.91	0	0	0	0.61	0.11	0.39
LOC4343492	0.98	0.74	0.95	11.38	30.26	13.17	1.3	1.27	1.47	7.08	3.51	5.72
LOC4348633	0.3	0.15	0.25	7.99	14.32	11.31	0.35	0.15	0.4	1.4	1.51	1.19
LOC107275911	0.09	0.21	0.31	0.82	0.22	1.39	0.05	0.02	0.05	0	0.02	0.07
LOC107276905	0.71	1.06	0.59	3.79	6.91	4.2	0.45	0.54	0.27	2.24	1.41	1.51
LOC9271477	10.61	9.6	24.54	30.02	4.48	82.16	17.2	15.98	16.47	4.96	4.77	3.54
LOC4330552	48.22	52.24	38.27	86.79	95.14	96.52	47.53	50.38	35.35	39.6	28.84	38.39
LOC107278464	0.18	0.59	0.27	3.14	5.14	3.4	0.29	0.85	0.1	0.43	0.4	0.55
LOC107276195	1.55	0.96	1.16	18.16	29.34	19.66	7.46	12.62	5.84	5.22	3.55	5.37
LOC4347520	4.36	6.2	4.74	8.4	13.14	12.24	3.92	4.21	3.15	5.5	4.01	5
LOC4342187	40.19	68.66	24.87	223.49	67.68	256.28	77.98	100.13	88.31	5.67	6.87	6
LOC4325697	0.08	0.08	0	0	0.17	1.53	0	0	0	0	0	0.17
LOC112936093	0.06	0.24	0.15	1.14	0.72	0.61	0	0	0	0.06	0.15	0.15
BGIG39947_31962	0	0	0.33	5.82	19.1	4.9	0	0.45	0.78	1.77	1.25	1.21
LOC4349274	0.51	0.98	0.79	3.86	6.3	6.03	1.32	1.24	1.31	3.31	2.61	2.13
LOC4335075	0.09	0.27	0.09	5.89	1.7	8.87	0.54	0.09	0.37	0.82	2.33	1.64
LOC4327297	0	0	0	5.33	7.2	5.16	0.05	0.14	0.19	2.33	3.1	2.44
LOC4344708	0.79	0.89	0.77	2.3	3.43	2.77	0	0.11	0	0.66	0.23	0.88
LOC4335218	26.29	28	14.56	123.37	161.85	121.86	70.03	66.23	63.06	84.94	49.17	65.03
LOC4334567	0.16	0.08	0	2.52	0.25	5.37	0.32	0.56	0.16	0.4	0.41	0.08
LOC9270863	1.74	2.14	1.63	4.53	7.13	4.33	2.68	2.39	2.47	2.94	2.66	2.15
LOC4324664	0.41	0.36	0.82	4.43	6.19	6.5	3.03	2.07	2.1	2.48	2.73	2
LOC4343047	0	0	0	0	0	1.15	0	0	0	0	0	0
LOC107276199	0.09	0.43	0.09	1.71	0	15.17	0	0.09	0.09	0.09	0.18	0.94
LOC4343726	0.25	0.15	0.05	4.25	5.23	4.1	0.26	1.19	0.66	1.59	1.29	0.97
LOC9269854	1.78	1.61	2.66	15.33	15.51	16.13	1.27	1.68	1.87	8.75	8.86	6.03
LOC4329324	0.78	0.23	0.52	4.67	0	5.75	1.08	0.52	0.79	1.05	1.47	0.62
LOC4336955	0.86	1.04	0.64	1.29	2.09	2.06	0.54	0.73	0.54	1.16	0.36	0.54
LOC4345909	1.73	1.63	1.24	3.56	6.18	5.22	1.79	2.87	2.47	2.32	1.89	2.65
LOC4336442	5.75	8.17	6.76	18.2	14.81	14.37	4.25	7.51	6.77	5.19	4.97	4.69
LOC4344266	0.71	1.68	0.84	1.16	0	6.38	0.13	0.13	0	0.32	0.66	0.32
LOC4351034	0.32	0.44	0.32	2.4	2.91	2.33	0.06	0.13	0	0.7	0.13	0.95
LOC4333404	0.03	0.22	0	0.22	0.7	0.54	0	0.11	0	0.06	0.11	0.03
LOC4328579	0.73	0.6	1.14	2.94	2.81	2.33	0.79	0.61	0.73	0.97	1.29	1.38
LOC4331085	0.12	0.04	0.19	1.98	0.04	5.93	0	0.04	0.04	0.59	0.79	0.62
LOC4342440	0.12	0.08	0.04	0.44	2.52	0.61	0.08	0.08	0.12	0.16	0.08	0.08
LOC4328788	3.96	7.32	4.07	12.48	4.75	14.76	3.92	5.51	4.64	2.96	4.85	4.9
LOC107277021	0.62	0.35	0.66	0.85	1.61	1.67	0.78	0.51	0.7	0.43	0.67	0.5
LOC107275898	0.21	0.18	0.15	1.79	3.44	2.21	0.06	0.06	0.12	1.27	0.97	1.41
LOC9268919	0.52	0.5	0.41	1.35	3.83	1.91	0.53	0.89	0.61	1.22	1.07	0.94
LOC4346629	3.07	3.96	2.46	13.15	20.21	14.77	0.27	0.27	0.19	5.63	5.28	4.13
LOC107277163	0.45	0.29	0.24	1.67	3.83	2.24	1.18	0.84	1.21	0.91	0.71	0.98
LOC4342086	1.57	2.46	1.39	4.01	4.42	5.89	0.23	0.34	0.84	2.2	1.54	1.45
LOC4344662	2.47	2.17	1.13	6.83	8.07	10.02	2.05	4.04	2.76	3.15	2.89	2.98
LOC4336189	0.01	0.06	0.04	0.1	0.47	0.25	0	0.03	0.03	0.06	0.04	0.07
LOC4352592	0.38	0.4	0.57	1.87	1.38	1.94	0.38	1.15	1.02	0.4	0.13	0.19
LOC9268017	0.2	0.17	0.33	1.85	4.06	2.72	0	0	0	1.03	0.86	1.23
LOC9266373	1.48	1.37	1.11	6.47	0.58	9.67	1.69	1.66	1.6	2.17	2.19	1.23
LOC9266405	0.18	0.18	0.13	0.38	0.73	0.55	0.25	0.21	0.29	0.27	0.14	0.23
LOC4336235	6.93	8.38	5.17	16.22	22.29	21.96	1.43	0.9	0.99	6.34	5.95	5.62
LOC112938358	0.2	0.28	0.19	1.24	2.74	1.43	0.75	0.83	0.64	0.86	0.77	0.7
LOC4327273	0.55	0.46	0.14	0.68	1	0.78	0.06	0.03	0.03	0.14	0.17	0.19
LOC4343098	0.63	0.9	0.41	18.61	45.8	26.07	1.55	1.65	1.77	10.55	13.21	9.54
LOC9269764	1.08	1.22	0.2	14.11	20.68	13.72	0.23	0.29	0.37	8.44	7.38	7.61
LOC107276262	0.23	0.12	0.17	0.26	0.91	0.44	0.24	0.18	0.18	0.12	0.06	0.03
LOC4329638	1.6	1.13	1.49	5.56	10.26	8.3	1.34	1.1	1.05	1.81	1.15	1.23
LOC4343079	3.04	2.9	3.03	11.3	17.3	14.52	6.14	4.76	4.98	4.94	3.46	3.79
LOC4342204	0	0.07	0	0.21	0.51	0.28	0	0	0	0	0	0
LOC4333807	1.4	1.72	1.72	8.42	11.67	11.63	0.66	0.2	0.27	3.39	2.23	3.04
LOC4346709	0.36	0.38	0.24	1.97	3.51	1.87	0.07	0.32	0.1	1.19	0.85	1.32
LOC107277282	0.68	0.65	0.83	1.16	2.43	1.95	0.36	0.61	0.33	0.1	0.1	0.25
LOC4345687	10.95	11.35	11.36	30.47	33.56	35.39	17.48	17.52	14.56	13.93	13.47	10.57
LOC9267503	0.02	0.04	0.02	0.33	0.7	0.6	0.05	0.02	0.02	0.16	0	0.07
LOC4328496	0.34	0.44	0.26	14.65	14.16	10.81	0.53	0.4	0.79	1.51	1.97	1.86
LOC4330716	0.32	0.16	0.26	1	3.85	1.93	0.59	0.99	0.75	1.31	0.63	1.04
LOC4352082	0	0	0	0.28	0.44	0.57	0	0	0	0	0.07	0.04
LOC9266773	0.61	0.41	0.4	1.14	1.89	1.4	0.47	1.1	0.27	0.41	0.14	0.47
LOC4338925	0.31	0.5	0.5	0.99	0.26	2.53	0.56	0.57	0.13	0.13	0.06	0.06
LOC4341212	0.48	0.26	0.17	0.48	1.87	1.36	0.58	0.4	0.48	0.31	0.62	0.92
LOC4333712	0.09	0.18	0.26	1.65	0.18	1.54	0.09	0	0	0.18	0.18	0.09
LOC4331916	10.24	10.73	10.05	16.16	20.95	23.98	12	8.3	8	6.66	4.85	5.99
LOC107277966	0.09	0.09	0.09	0.63	0.56	0.61	0.18	0.09	0	0	0.28	0
LOC4346295	0.57	0.45	0.53	3.45	3.6	3.43	0.7	1.03	0.61	1.15	1.28	0.86
LOC4351819	0.36	0.63	0.77	13.39	16.54	10.28	1.55	1.42	1.09	1.64	1.84	1.36
LOC4324610	15.69	21	9.95	51.51	36.13	69.55	8.37	13.53	8.96	24.98	28.32	25.23
LOC4342076	1.25	1.41	1.18	4.16	4.98	7.28	1.51	2.21	2.02	2.35	2.52	1.99
LOC4331524	0.35	0.67	0.17	1.07	1.18	1.03	0.35	0.58	0.2	0.13	0.17	0.12
LOC4344737	4.42	3.09	3	5.41	8.19	7.25	2.89	2.31	3.11	3.74	3.16	3.26
LOC4340683	0.24	0.16	0.08	1.26	2.08	1.84	0	0.04	0.04	0.29	0.04	0.12
LOC4335326	1.68	1.36	1.64	3.46	4.9	5.3	2.36	2.11	1.92	1.84	1.43	1.36
LOC4331063	0.07	0.1	0.07	0.07	0.6	0.43	0.1	0.19	0.24	0.14	0.1	0
LOC107278611	0.99	1.28	0.44	4.17	7.42	5.55	0.1	0.05	0.15	3.33	2.55	2.71
LOC4348268	0.1	0.37	0.02	0.4	0	10.17	0	0.08	0.1	0	0.25	0.95
LOC4348796	7.07	11.06	7.08	19.74	19.3	26.24	4.39	6.69	5.71	10.51	8.43	9.73
LOC4352613	3.52	3.38	3.03	6.47	11.24	8.89	1.99	1.61	2.11	4.3	4.02	3.26
LOC107280422	0	0	0	0.79	1.16	0.69	0.05	0.11	0.14	0.39	0.37	0.27
LOC9266659	15.21	19.65	5.97	597.01	571.07	551.69	6.6	6.95	9.07	171.84	136.71	126.68
LOC4345815	0.06	0	0.06	4.71	0.4	1.83	0	0.06	0	0.11	0.4	0.28
LOC4342046	0.07	0.04	0	2.22	6.92	4.3	0.7	0.97	1.13	2.46	1.51	1.3
LOC4340079	1.22	1.91	1.7	2.19	1.04	15.92	1.39	2.65	3.13	0.8	0.31	1
LOC4332705	0.15	0.12	0.08	1.95	2.83	1.83	0.27	0.38	0.35	0.71	0.56	0.55
LOC4344255	0.96	1.08	1.64	10.21	0.26	19.56	0.19	0.19	0.64	4.15	5.1	1.27
LOC4326814	2.51	2.5	2.39	4.78	7.49	6.06	2.35	2.35	1.48	2.22	2.79	2.71
LOC4329742	0.93	2.4	1.39	5.23	6.91	6.35	0.17	0.27	0.17	1.86	3.45	2.46
LOC9270824	0	0.02	0	0.89	1.59	1.2	0.06	0.15	0	0.33	0.25	0.25
LOC4329459	15.87	18.14	14.71	56.37	61.34	52.36	10.17	15.92	11.62	24.4	32.09	27.33
LOC4336343	0.83	0.33	0.99	11.26	11.34	8.4	0.67	0.96	0.46	0.87	0.71	0.37
LOC4329329	2	2.49	1.65	10.21	0.19	11.16	0.12	0.44	1.08	2.15	2.54	0.52
LOC9270349	0.17	0.08	0.11	3.14	0.24	0.41	0.22	0.35	0.34	0.19	0.3	0.3
LOC4330713	106	164.93	102.3	838.8	1565.63	1167.63	233.75	232.17	256.77	468.03	440.57	391.58
LOC107275828	0.02	0.04	0.02	0.36	0.18	0.23	0.02	0.04	0.04	0	0	0.06
LOC107276210	0.17	0	0.11	1.2	2.8	1.36	0	0.06	0	0	0	0
LOC4337313	0.55	0.88	0.82	4.86	4.76	5.72	2.21	2.21	2.03	2.14	2.65	1.93
LOC4351918	76.15	79.04	68.68	214.36	190.79	236	83.96	112.62	105.32	76.26	79.6	72.22
LOC4347547	0.38	0.32	0.38	1.44	1.85	1.7	0.6	0.45	0.59	0.57	0.33	0.56
LOC107277348	1.47	0.99	1.12	4.86	8.16	6.1	0.43	1.11	0.34	0.97	0.46	1.31
LOC4325014	0.77	0.82	0.56	5.44	11.53	7.78	2.31	2.78	1.87	2.77	2.13	4.1
LOC107276985	0	0	0	0	0	1.24	0	0	0	0	0	0
LOC4339066	2.11	1.47	2.74	1.77	0.06	17.58	0.07	0.14	0.17	0.23	0.2	0.19
LOC9271479	4.02	7.42	2.82	42.76	6.4	23.48	0.35	0.27	0.09	3.36	4.69	5.37
LOC4341552	0.78	0	0.46	0.9	2.5	2.14	0.3	0.93	0.31	0.15	0	0.6
LOC4335495	0.1	0.1	0.07	1.66	3.5	1.58	0.31	0.42	0.13	0.73	0.42	0.59
LOC9267910	0	0	0	1.08	3.07	2.22	0.13	0	0.17	1.17	0.65	0.43
LOC4341971	3.23	3.64	3.68	24.46	19.77	16.25	4.66	3.61	3.74	4.84	4.15	3.56
LOC107277456	0.52	0.99	0.17	7.78	13.15	10.29	0.88	1.05	1.02	4.91	4.2	5.53
LOC4326920	0.16	0.12	0.08	4.42	1.33	4.57	0.37	1.54	0.54	1.45	1.88	1.64
LOC9269781	3.06	1.62	1.57	5.73	8.9	8.05	3.57	3.64	1.98	4.51	2.6	2.95
LOC4349149	0.51	0.65	0.45	1.25	2.72	1.96	0.76	1.02	1.27	0.76	1.33	0.9
LOC4326919	0.29	0.25	0.41	2.3	0.52	2.19	0.79	0.67	0.7	0.37	0.46	0.33
LOC4329753	0.26	0.21	0.09	0.47	1.02	0.34	0.04	0.17	0	0.47	0.13	0.09
LOC4324194	4.75	6.16	7.99	21.91	7.93	19.54	3.03	2.55	2.73	1.09	0.49	0.56
LOC4336179	0	0	0	0.28	0.05	0.22	0	0	0	0	0.03	0.07
LOC4340084	4.66	6.5	11.46	25.92	3.71	63.53	4.75	5.38	5.83	9.89	11.52	6.76
LOC4332300	0.6	0.46	0.07	3.53	3.89	3.18	0.13	0.67	0.2	1.59	0.94	1.05
LOC112936042	38.27	43.67	26.09	152.68	122.69	115.2	13.14	16.87	16.71	38.02	47.58	48.8
LOC4327448	0.28	0.34	0.34	0.65	1.45	1.15	0.13	0.41	0.19	0.34	0.31	0.4
LOC4342714	0.08	0.08	0.17	0.71	0.92	1.01	0.21	0.3	0.04	0.3	0.34	0.25
LOC4332651	0.59	0.73	0.55	4.23	2.75	3.33	1.55	2.08	1.12	1.05	0.96	1.15
LOC4338611	15.79	23.74	8.86	146.28	210.19	174.86	8.72	11.2	12.63	67.04	55.54	58.03
LOC4351369	0.26	0.1	0.23	3.71	3.95	2.95	0	0.1	0.03	0.54	0.67	0.63
LOC4324829	0.56	0.72	0.7	7.09	1.44	5.02	0.64	0.84	0.51	1.77	1.95	1.92
LOC4326433	0.21	0.43	0.28	1.48	0.52	3.15	0.36	0.22	0.21	0.5	1.23	0.71
LOC4332763	0.1	0.3	0.15	1.43	2.83	2.12	0.15	0.2	0.15	0.45	0.2	0.15
LOC4331044	5.6	4.91	2.77	7.11	5.37	23.09	1.3	1	1.51	2.44	2.26	3.42
LOC4339680	3.95	5.26	4.3	15.51	8.98	14.96	4.36	5.19	4.62	4.48	5.25	3.95
LOC4326394	2.25	4.61	1.14	27.26	17.29	29.29	6.98	10.55	11.5	7.57	10.57	12.58
LOC4337350	4.36	5.94	2.76	5.37	19.09	12.04	5.85	6.72	4.68	0.88	1	1.35
LOC107276042	0.08	0.08	0	1.76	0.04	2.81	0.12	0.53	0.52	0.08	0.12	0.12
LOC4346133	0.83	0.54	0.5	1.28	3.05	2.56	0.85	0.77	0.74	0.65	0.44	0.79
LOC4346124	0.28	0.32	0.15	1.05	1.18	1.02	0.31	0.36	0.28	0.51	0.59	0.53
LOC4335417	0.15	0	0.2	1.64	0.46	3.48	0.05	0	0	0.26	0.2	0
LOC4325972	3.39	5.46	4.46	10.95	7.83	16.79	0.62	0.63	0.43	5.57	7.61	4.76
LOC4349097	2.9	2.89	2.27	9.96	20.56	21.11	4.74	4.82	4.12	5.41	4.11	6.75
LOC4339688	1.44	1.96	1.06	2.82	4.78	5.02	1.86	1.36	2.5	2.41	1.81	2.13
LOC4341509	0.19	0.76	0.05	5.91	11.57	7.47	0.13	0.12	0.17	3.15	2.54	3.78
LOC4345986	0.08	0.05	0.08	2.3	3.33	2.66	0.19	0.61	0.3	1.12	0.86	1.6
LOC4331633	0	0	0	1.32	4.14	1.55	0.06	0	0	0.23	0.41	0.29
LOC9268153	1.29	1.49	0.91	6.32	5.97	5.96	2.8	2.06	1.94	1.56	1.22	0.98
LOC9268232	8.17	9.43	2.62	201.63	206.34	188.12	10.16	16.42	16.81	83.81	123.61	91.59
LOC4339414	5.41	4.02	5.88	21.11	81.02	30.26	3.92	7.08	7.58	26.66	23.73	13.75
LOC9271949	0.04	0.04	0	0.04	0.25	1.75	0	0	0.12	0.2	0.4	0.28
LOC4324903	1.81	1.45	0.56	13.03	11.96	25.49	5.61	3.97	5.39	5.35	8.21	4.44
LOC4348591	1.54	1.27	1.59	4.37	1.85	19.27	1.53	1.49	2.31	2.31	1.43	1.27
LOC4324706	0	0	0	0.97	2.06	0.49	0	0.04	0	0.37	0.16	0.32
LOC4325844	0	0	0.04	0.21	0.65	0.33	0.04	0	0.04	0.04	0.13	0.17
LOC4352063	0.79	0.93	0.43	2.83	2.07	2.16	0.15	0.23	0.14	0.87	0.5	0.78
LOC4336441	1.09	1.28	0.92	17.98	20.13	14.67	1.9	4.11	2.92	8.85	8.25	9.12
LOC4335754	5.5	5.01	4.84	14.02	16.54	16.6	5.21	7.29	4.71	5.89	5.46	4.35
LOC4331928	0.66	0.73	0.72	20.64	38.03	39.56	3.12	3.17	4.46	12.19	8.96	6.52
LOC4323850	0	0	0	0.25	0.15	0.11	0.04	0	0	0	0	0
LOC4324781	0.05	0.25	0.08	3.32	1.88	2.95	0	0	0.04	0.65	0.97	1.14
LOC9272590	0.9	1.69	1.51	3.44	2.67	6.41	1.51	1.27	0.99	0.45	0.18	0.5
LOC4334080	0.19	0.14	0.14	0.05	0.32	2.34	0.42	0.31	0.55	0.5	0.11	0.22
LOC4331822	1.51	2.02	1.09	5.76	12.27	8.91	0.52	0.95	1.36	4.04	3.97	4.55
LOC4331422	4.86	4.69	4.12	12.7	33.78	20.61	10.68	10.4	8.47	7.16	5.45	5.66
LOC4346334	0.86	1.08	0.56	5.68	4.41	5.73	1.02	1.45	1.28	0.83	2.36	1.91
LOC4333492	0.03	0	0	0.18	0.18	0.3	0	0.03	0	0.03	0	0.03
LOC9271554	2.07	3.37	1.53	10.42	7.7	13.7	3.64	2.18	2.16	3.37	2.71	3.56
LOC4344094	6.2	7.6	2.62	86.93	16.94	82.79	2.08	1.9	3.34	22.41	27.86	34.88
LOC107275960	0.16	0.31	0	0.75	0.57	0.9	0	0.04	0	0.2	0.36	0.43
LOC107276347	0.57	0.48	0.65	0.65	1.95	1.13	0.09	0	0	0.05	0	0.09
LOC4336193	11.07	10.35	9.03	18.75	21.72	28.59	8.56	10.56	9.75	11.37	8.12	9.7
LOC4351985	0	0	0	2.93	4.15	1.75	0.6	0.55	0.49	2.01	0.93	0.48
LOC4331509	0	0	0.03	0.48	0.95	0.95	0.03	0	0.23	0.11	0.23	0.17
LOC4348342	10.77	15.72	4	350.98	174.71	201.87	0.52	1.13	0.3	15.51	17.86	19.7
LOC9266367	0.23	0.65	0.23	4.47	10.66	7.9	0.24	0.14	0.19	0.09	0.05	0.09
LOC9269739	0.72	0.86	0.61	4.73	11.71	7.37	1.98	2.57	2.99	2.71	3.08	2.54
LOC4344706	0.11	0	0.08	3.71	4.13	2.54	0.51	0.53	0.72	0.69	0.83	0.74
LOC4325285	0.2	0.27	0.14	0.9	2.38	1.33	0.69	0.64	0.82	0.82	0.44	0.54
LOC9269452	0.34	0.51	0.37	1.29	1.05	1.01	0.58	0.23	0.26	0.46	0.61	0.37
LOC9268702	0.04	0.04	0	3.75	3.36	2.83	0.18	0.14	0.27	0.14	0.23	0.22
LOC4325529	3.29	4.59	2.51	4.86	21.41	12.79	3.17	3.89	3.91	4.03	3.49	6.13
LOC4340732	0.46	0.59	0.12	3.44	13.39	6.44	2.63	2.4	1.45	4.29	3.36	3.35
LOC4338405	0	0	0	0.07	0.2	0.09	0	0	0	0.02	0.02	0
LOC4334038	3.82	4.87	2.86	24.28	26.3	31.18	7.19	8.73	7.08	9.01	10.81	9.57
LOC4327803	0.65	0.84	0.65	4.17	0.52	2.48	0.05	0.35	0.7	0.05	0	0.15
LOC4323952	0.01	0.04	0	0.3	0.63	0.2	0.01	0.01	0	0.08	0.12	0.03
LOC4330637	0.08	0.17	0.08	0.53	1.48	0.73	0.2	0.39	0.17	0.39	0.23	0.25
LOC4330735	0	0	0	0.59	0.83	0.77	0.03	0	0.07	0.27	0.34	0.27
LOC4336908	4.96	4.63	0.57	13.34	17.47	16.02	0.21	0.21	0.16	7.17	5.04	6.39
LOC4336546	4.3	6.1	4.1	25.26	32.76	27.53	4.7	5.35	5.48	10.36	10.48	9.08
LOC9270116	0	0.03	0	0.87	0	0.58	0	0	0	0.09	0.09	0.06
LOC4347650	0.28	0.58	0.15	6.86	2.46	6.12	0.66	1.26	0.73	0.21	0.25	0.28
LOC4340506	0.1	0.27	0.29	0.47	0.54	0.9	0.18	0.02	0.15	0.1	0.23	0.17
LOC4329752	5.86	6.54	5.57	20.53	20.69	22.8	7.08	12.02	7.65	7.27	7.76	7.1
LOC4336769	0.46	0.2	0.19	1.17	1.01	1.16	0.26	0.13	0.07	0.07	0.2	0.13
LOC4335647	2.63	2.73	1.21	7.75	19.37	12.21	7.49	5.56	4.61	0.35	0.03	0.47
LOC107277311	0.14	0.12	0.12	1.03	1.48	1.46	0.02	0	0.04	0.54	0.46	0.33
LOC4333118	0.52	0.75	0.41	7.08	14.03	10.54	1.08	0.81	0.63	1.01	0.46	0.61
LOC4352683	0	0	0	0.92	0.13	9.78	0	0.13	0.27	0.37	0.96	0
LOC4330152	1.71	1.69	1.2	4.71	7.98	5.8	1.37	1.05	1.23	2.91	2.89	2.77
LOC4345668	0	0.13	0.16	1.01	0.95	0.8	0.32	0.35	0.44	0.35	0.48	0.25
LOC4339974	0.12	0.06	0.31	4.06	0.24	1.32	0.29	0.29	0.12	0.16	0.08	0.15
LOC4346219	0	0.07	0	1.96	0	2.99	0.07	0.13	0.26	0.33	0.94	0.79
LOC4344575	2.29	2.47	3.48	4.37	2.51	16.39	3.44	3.02	3.96	1.82	2.66	1.61
LOC4328649	1.42	1.29	0.98	5.26	6.76	7.42	1.48	2.12	1.05	3.65	1.44	2.33
LOC107275740	0.15	0.01	0.05	0.53	0.71	0.67	0.15	0.11	0.04	0.33	0.3	0.24
LOC4337421	7.04	12.36	8.45	17.73	9.85	29.9	4.47	5.82	7.32	5.25	7.45	7.2
LOC4337704	0.25	0.18	0.15	0.79	0.27	0.6	0.26	0.21	0.15	0.28	0.08	0.18
LOC4331101	0.14	0.18	0.36	3.49	0.14	9.41	0.05	0.05	0.18	0.87	1.06	0.19
LOC4337342	0.03	0.06	0.09	0.51	0.28	0.27	0	0	0.15	0.03	0.12	0.15
LOC4346394	1.55	1.07	1.48	3	6.6	4.6	1.77	2.12	2.7	2.66	2.09	1.87
LOC4333413	10.23	10.9	8.74	19.93	28.73	23.11	11.8	12.59	9.5	12.51	9.36	10.48
LOC4325015	0	0.03	0	0.08	0.4	0.31	0	0	0	0.03	0	0
LOC4326918	0.17	0.25	0	2.73	1.27	2.57	0.13	0.13	0.17	0.3	0.64	0.76
LOC4343690	0.47	0.36	0.21	0.91	2.58	1.73	0.37	0.39	0.68	0.54	0.58	0.26
LOC4345923	11.42	11.53	6.95	70.35	80.69	63.37	7.6	12.52	9.71	29.57	29.16	29.78
LOC4332595	5.44	5.8	6.55	7.65	0.07	32.84	0.53	0.93	0.86	2.49	3.3	2.46
LOC4340338	1.52	1.1	0.58	9.8	19.72	22.91	2.27	2.79	2.44	9.05	5.07	10.48
LOC9268371	1.2	1.39	0.88	7.03	3.32	16.69	0.22	0.51	0.74	2.11	4.57	3.02
LOC4348740	0.24	0.24	0.21	1.11	0.13	0.43	0	0.21	0.12	0	0	0
LOC4331328	43.09	62.1	34.34	268.82	408.53	351.65	112.58	135.81	149.75	159.02	152.84	118.57
LOC107276351	1.69	2.2	1.65	4.4	3.98	3.6	2.28	1.87	1.22	1.81	0.89	1.86
LOC4325182	0.31	0.3	0.3	1.03	2.01	1.87	0.95	0.72	0.35	0.57	0.9	0.89
LOC9270528	1.83	1.94	1.2	4.47	8.55	7.19	2.65	1.68	2.08	2.04	1.56	1.99
LOC4349359	0	0	0	1.1	1.16	0.34	0	0	0	0.69	0.17	0.21
LOC4330777	8.1	7.11	9.2	37.18	40.32	32.3	10.29	7.86	6.56	10.69	12.49	11.1
LOC4348595	6.44	6.4	1.86	32.22	31.5	25.95	3.39	5.05	4.79	13.52	12.18	12.84
LOC4343297	1.07	0.32	0.36	1.15	1.99	1.56	0.8	0.56	0.44	0.36	0.53	0.36
LOC4343910	0.06	0.1	0.1	0.55	0.87	1.07	0.08	0.17	0.18	0.25	0.23	0.14
LOC4347102	0.62	0.52	0.4	1.9	0.42	1.4	0.65	0.48	0.62	0.48	0.34	0.33
LOC107280424	0	0	0	0.16	1.82	0.37	0.04	0.04	0.12	0.25	0.25	0.08
LOC4325196	0.7	0.92	0.72	2.93	3.94	3.94	1.5	1.61	1.41	1.47	1.29	1.21
LOC107278159	0.2	0	0	1.71	0.05	0.98	0	0.1	0.05	0.1	0.65	0.44
LOC4334140	0	0	0	0.37	0.43	0.29	0.05	0.16	0.11	0.05	0.05	0.11
LOC9271905	0.1	0.1	0.03	1.28	2.28	1.37	0.15	0.43	0.2	0.28	0.36	0.23
LOC4327532	0.04	0.16	0.04	2.1	2.66	1.71	0.45	1.89	0.73	0.37	0.33	0.32
LOC4329655	0.8	1.27	0.48	4.82	8.29	3.97	0.21	1.03	0.48	0.86	0.65	0.9
LOC4324802	4.93	5.93	2.56	17.91	30.08	21.88	1.58	2.61	2.32	9.82	7.58	9.78
LOC107278035	1.34	1.66	1.99	4.59	5.08	6.68	2.4	1.92	2.68	1.23	1.13	1
LOC4343574	7.9	9.78	7.47	20.92	15.87	14.48	3.97	4.83	5.52	6.62	5.14	5.53
LOC4345105	2.4	2.09	2.03	8.99	8.22	10.12	2.78	2.43	2.21	4.37	4.05	3.82
LOC4346234	0	0.03	0.13	0.63	1.1	0.51	0.38	0.27	0.21	0.05	0.05	0.19
LOC4327121	17.5	22.41	12.57	38.71	56.34	56.17	5.82	8.49	8.72	15	13.54	15.39
LOC107276596	0.03	0.17	0.13	1.27	0.66	0.64	0.44	0.41	0.44	0.24	0.24	0.37
LOC4349648	2.3	1.88	1.6	11.18	12.18	10.82	0.78	0.89	1.02	3.39	5.36	3.98
LOC4342512	0	0	0.04	0.67	1.07	0.28	0.04	0.12	0.12	0.24	0	0.04
LOC4343432	0	0.07	0.22	0	0.04	1.38	0	0	0	0	0.16	0.07
LOC9269394	0.03	0	0	0.36	2.34	0.99	0.17	0.23	0.34	0.48	0.54	0.25
LOC9269572	0.22	0.22	0.44	0.93	0.29	1.04	0.28	0.17	0.11	0.5	0.11	0.05
LOC4346431	0	0	0.07	0.31	0.45	0.28	0.07	0	0.03	0.1	0.13	0.07
LOC9270624	1.36	3.43	1.21	16.46	16.55	18.13	1.15	0.75	1.35	4.54	3.29	4.57
LOC4341515	0	0	0.08	1.28	2.07	1.49	0	0	0	0.16	0.24	0.08
LOC9268931	0.18	0.44	0	3.04	0.27	2.39	0	0	0	0.44	0.27	0.78
LOC4342096	0.19	0.91	0.69	3.81	3.89	2.09	0.72	1.44	1.06	0.39	1.54	1.4
LOC112936166	0.71	0.04	0.02	0.21	0.33	0.3	0.14	0.06	0.1	0.08	0.06	0.02
LOC107281276	0.52	0.68	0.16	6.19	15.28	6.95	0.23	0.3	0.26	4.29	4.98	3.82
LOC107275962	0	0.06	0	0.77	0.06	0.44	0.03	0.06	0.03	0	0	0
LOC107280921	0	0	0	0.18	0.57	0.42	0	0	0	0.06	0	0
LOC4337224	0.09	0	0	0.72	0.75	0.41	0.09	0.09	0	0	0	0.05
LOC107275769	0.19	0.08	0.08	1.06	2.26	0.99	0.54	0.62	0.38	0.65	0.62	0.49
LOC4335720	0.16	0.19	0.04	1.08	2.1	1.83	0.47	0.24	0.27	0.24	0.04	0.16
LOC4340513	0.89	1.28	0.97	8.09	13.29	8.61	2.55	2.48	2.01	1.43	1.13	0.98
LOC4347337	1.93	1.61	1.9	6.15	3.87	4.7	1.83	2.46	1.85	0.89	1.19	1.1
LOC107276410	0.36	0.84	0.54	7.69	13.6	12.98	1.39	1.04	1.88	1.03	0.49	0.42
LOC4325559	26.38	38.17	19.97	104.46	116.21	122.33	11.78	11.33	9.98	31.02	29.71	22.46
LOC4335455	107.67	111.74	68.83	270.02	336.61	263.68	49.86	57.91	46.5	140.33	130.87	148.43
LOC4326745	0.84	0.96	0.49	2.31	5	2.69	0.25	0.38	0.36	0.68	0.16	0.29
LOC4345814	0.02	0.1	0	0.34	0.03	0.7	0	0.03	0.02	0.02	0	0
LOC4346484	0.26	0.17	0.26	0.68	0.35	1.75	0.09	0.17	0.09	0.09	0.09	0.09
LOC4346253	4.41	3.94	3.71	0.75	0.73	0.92	5.18	7.33	7.81	12.54	7.38	17.31
LOC4329031	0.63	0.61	0.3	0.17	0.21	0.35	0.5	0.73	1.03	3.22	2.94	3.09
LOC4326661	0.96	0.49	0.89	0.33	0.48	0.23	0.4	1.48	0.73	24.7	49.87	58.42
LOC9266372	90.7	80.8	98.33	41.61	20.51	31.09	55.15	71.79	68.5	72.47	70.17	71.3
LOC4343216	2.31	2.59	2.01	0.63	0.25	0.37	1.01	0.89	0.88	1.85	1.48	2.25
LOC4347994	8.89	4.9	6.78	0.08	0.17	0.21	0.51	0.63	0.92	0.88	0.3	0.29
LOC4332224	14.86	10.75	11.04	2.34	4.02	2.9	9.94	8.22	7.18	13.42	13.59	14.85
LOC4345205	8.53	9.38	9.1	3.84	2.59	3.85	22.83	32.51	30.41	15.76	12.74	20.5
LOC4339480	5.43	5.38	7.56	1.02	2.62	2.56	13.6	11.64	11.6	3.77	5.56	6.2
LOC4329175	2	1.94	2.17	0.58	0.79	1.11	2.12	1.94	1.55	2.17	2.62	3.05
LOC4329454	6.67	5.75	6.51	1.72	0.28	0.98	4.26	4.32	4.46	1.93	2.35	2.66
LOC4352487	16.35	8.06	16.73	6.4	1.67	4.73	10.93	16.54	9	7.28	12.17	12.22
LOC112936027	1.66	3.85	0.89	0.21	0.21	0.68	5.85	6.91	12.59	3.32	2.31	3.78
LOC4342716	0.21	0	0.36	0	0	0	0.76	0.22	0	0	0.55	0
LOC4352488	8.28	3.09	8.81	2.71	0.85	3.63	5.88	5.45	6.77	6.75	12.17	16.41
LOC4341337	2.04	1.23	0.41	0.44	0.19	0.3	0.98	0.36	1.28	3.03	2.17	2.7
LOC4350344	0.04	0.21	0.92	0	0	0	0.08	0.34	0.17	8.59	9.59	9.72
LOC4347441	123.86	103.77	99.44	26.31	7.54	12.27	41.51	61.74	63.24	134.04	104.32	156.97
LOC4346054	3.39	1.97	2.39	0.14	0.63	0.25	14.1	16.06	13.88	4.93	1.72	2.9
LOC4346755	2.7	1.91	2.23	0.35	0.18	0.21	2.19	3.24	3.39	3.26	2.09	4.72
LOC4345303	1.5	0.83	1.47	0.91	0.38	0.45	1.19	1.08	1.36	1.6	1.74	2.16
LOC4349267	2.07	1.71	3.43	0.82	0.78	0.54	4.68	10.04	8.29	5.87	6.51	9.6
LOC107279011	9.02	8.3	8.37	3.94	1.19	3.27	37.26	20.46	20.88	9.03	15.41	14.53
LOC9266532	29.5	29.54	22.55	9.34	4.87	9.22	33.1	16.02	26.02	20.12	28.27	33.23
LOC9268921	4.43	0.29	0	0	0	0	0	0.35	0.47	0	5.41	0
LOC107276550	1.36	2.7	3.49	0.18	0	0.17	1.43	0.46	0.91	1.09	1.52	1.41
LOC4350063	5.94	4.38	7.56	2.38	0.45	1.85	3	4.62	5.51	11.42	12.53	12.48
LOC4344843	18	19.94	33	9.02	5.37	9.42	10.1	13.18	31.17	58.02	45.57	60.34
LOC4335672	0.71	0.46	0.69	0.15	0.08	0.21	0.65	0.9	0.77	1.01	1.27	1.81
LOC4326025	0.18	0.08	0.18	0	0	0	0.12	0	0.01	0	0.18	0
LOC4348440	0.41	0.49	0.65	0.22	0.09	0.11	0.56	0.33	0.55	0.64	0.36	0.27
LOC4351187	6.07	4.31	4.75	0.66	0.58	1.49	5.13	4.45	5.63	2.57	1.41	1.66

## Sheet: Table S6
Table S6. Genes in 3 modules output by WGCNA
Gene Symbol	Module
LOC9266372	turquoise
LOC4343216	turquoise
LOC4332224	turquoise
LOC4329175	turquoise
LOC4329454	turquoise
LOC4352487	turquoise
LOC4347441	turquoise
LOC4346755	turquoise
LOC4345303	turquoise
LOC9266532	turquoise
LOC4348440	turquoise
LOC4351187	turquoise
LOC4334864	turquoise
LOC4336794	turquoise
LOC107276247	turquoise
LOC107281879	turquoise
LOC107278166	turquoise
LOC107277012	turquoise
LOC9267999	turquoise
LOC4329093	turquoise
LOC107278411	turquoise
LOC4342063	turquoise
LOC107278774	turquoise
LOC4336857	turquoise
LOC4335993	turquoise
LOC4331886	turquoise
LOC9272330	turquoise
LOC4346153	turquoise
LOC107277982	turquoise
LOC107276173	turquoise
LOC4340754	turquoise
LOC9270308	turquoise
LOC107276957	turquoise
LOC9270078	turquoise
LOC4327887	turquoise
LOC4329486	turquoise
LOC4334907	turquoise
LOC4324822	turquoise
LOC4348094	turquoise
LOC4348382	turquoise
LOC4346292	turquoise
LOC4332778	turquoise
LOC4345748	turquoise
LOC4324213	turquoise
LOC4326048	turquoise
LOC4345703	turquoise
LOC4329013	turquoise
LOC4331336	turquoise
LOC4334834	turquoise
LOC4348341	turquoise
LOC107278602	turquoise
LOC4337274	turquoise
LOC4336108	turquoise
LOC4341170	turquoise
LOC4326826	turquoise
LOC4333060	turquoise
LOC4324330	turquoise
LOC4344505	turquoise
LOC4326946	turquoise
LOC4347919	turquoise
LOC9268653	turquoise
LOC4341299	turquoise
LOC107277149	turquoise
LOC4338619	turquoise
LOC4343492	turquoise
LOC4348633	turquoise
LOC107276905	turquoise
LOC4330552	turquoise
LOC107278464	turquoise
LOC107276195	turquoise
LOC4347520	turquoise
LOC112936093	turquoise
BGIG39947_31962	turquoise
LOC4349274	turquoise
LOC4327297	turquoise
LOC4344708	turquoise
LOC4335218	turquoise
LOC9270863	turquoise
LOC4324664	turquoise
LOC4343726	turquoise
LOC9269854	turquoise
LOC4336955	turquoise
LOC4345909	turquoise
LOC4336442	turquoise
LOC4351034	turquoise
LOC4333404	turquoise
LOC4328579	turquoise
LOC4342440	turquoise
LOC107277021	turquoise
LOC107275898	turquoise
LOC9268919	turquoise
LOC4346629	turquoise
LOC107277163	turquoise
LOC4342086	turquoise
LOC4344662	turquoise
LOC4336189	turquoise
LOC4352592	turquoise
LOC9268017	turquoise
LOC9266405	turquoise
LOC4336235	turquoise
LOC112938358	turquoise
LOC4327273	turquoise
LOC4343098	turquoise
LOC9269764	turquoise
LOC107276262	turquoise
LOC4329638	turquoise
LOC4343079	turquoise
LOC4342204	turquoise
LOC4333807	turquoise
LOC4346709	turquoise
LOC107277282	turquoise
LOC4345687	turquoise
LOC9267503	turquoise
LOC4328496	turquoise
LOC4330716	turquoise
LOC4352082	turquoise
LOC9266773	turquoise
LOC4341212	turquoise
LOC4331916	turquoise
LOC107277966	turquoise
LOC4346295	turquoise
LOC4351819	turquoise
LOC4324610	turquoise
LOC4342076	turquoise
LOC4331524	turquoise
LOC4344737	turquoise
LOC4340683	turquoise
LOC4335326	turquoise
LOC4331063	turquoise
LOC107278611	turquoise
LOC4348796	turquoise
LOC4352613	turquoise
LOC107280422	turquoise
LOC9266659	turquoise
LOC4342046	turquoise
LOC4332705	turquoise
LOC4326814	turquoise
LOC4329742	turquoise
LOC9270824	turquoise
LOC4329459	turquoise
LOC4336343	turquoise
LOC4330713	turquoise
LOC107275828	turquoise
LOC107276210	turquoise
LOC4337313	turquoise
LOC4351918	turquoise
LOC4347547	turquoise
LOC107277348	turquoise
LOC4325014	turquoise
LOC4341552	turquoise
LOC4335495	turquoise
LOC9267910	turquoise
LOC4341971	turquoise
LOC107277456	turquoise
LOC9269781	turquoise
LOC4349149	turquoise
LOC4329753	turquoise
LOC4332300	turquoise
LOC112936042	turquoise
LOC4327448	turquoise
LOC4342714	turquoise
LOC4338611	turquoise
LOC4351369	turquoise
LOC4332763	turquoise
LOC4326394	turquoise
LOC4337350	turquoise
LOC4346133	turquoise
LOC4346124	turquoise
LOC4325972	turquoise
LOC4349097	turquoise
LOC4339688	turquoise
LOC4341509	turquoise
LOC4345986	turquoise
LOC4331633	turquoise
LOC9268153	turquoise
LOC9268232	turquoise
LOC4339414	turquoise
LOC4324903	turquoise
LOC4324706	turquoise
LOC4325844	turquoise
LOC4352063	turquoise
LOC4336441	turquoise
LOC4335754	turquoise
LOC4331928	turquoise
LOC4323850	turquoise
LOC4324781	turquoise
LOC4331822	turquoise
LOC4331422	turquoise
LOC4346334	turquoise
LOC4333492	turquoise
LOC9271554	turquoise
LOC107275960	turquoise
LOC107276347	turquoise
LOC4336193	turquoise
LOC4351985	turquoise
LOC4331509	turquoise
LOC4348342	turquoise
LOC9266367	turquoise
LOC9269739	turquoise
LOC4344706	turquoise
LOC4325285	turquoise
LOC9269452	turquoise
LOC9268702	turquoise
LOC4325529	turquoise
LOC4340732	turquoise
LOC4338405	turquoise
LOC4334038	turquoise
LOC4323952	turquoise
LOC4330637	turquoise
LOC4330735	turquoise
LOC4336908	turquoise
LOC4336546	turquoise
LOC4340506	turquoise
LOC4329752	turquoise
LOC4336769	turquoise
LOC4335647	turquoise
LOC107277311	turquoise
LOC4333118	turquoise
LOC4330152	turquoise
LOC4345668	turquoise
LOC4328649	turquoise
LOC107275740	turquoise
LOC4337342	turquoise
LOC4346394	turquoise
LOC4333413	turquoise
LOC4325015	turquoise
LOC4326918	turquoise
LOC4343690	turquoise
LOC4345923	turquoise
LOC4340338	turquoise
LOC4331328	turquoise
LOC107276351	turquoise
LOC4325182	turquoise
LOC9270528	turquoise
LOC4349359	turquoise
LOC4330777	turquoise
LOC4348595	turquoise
LOC4343297	turquoise
LOC4343910	turquoise
LOC107280424	turquoise
LOC4325196	turquoise
LOC4334140	turquoise
LOC9271905	turquoise
LOC4327532	turquoise
LOC4329655	turquoise
LOC4324802	turquoise
LOC107278035	turquoise
LOC4343574	turquoise
LOC4345105	turquoise
LOC4346234	turquoise
LOC4327121	turquoise
LOC4349648	turquoise
LOC4342512	turquoise
LOC9269394	turquoise
LOC4346431	turquoise
LOC9270624	turquoise
LOC4341515	turquoise
LOC4342096	turquoise
LOC107281276	turquoise
LOC107280921	turquoise
LOC4337224	turquoise
LOC107275769	turquoise
LOC4335720	turquoise
LOC4340513	turquoise
LOC107276410	turquoise
LOC4325559	turquoise
LOC4335455	turquoise
LOC4326745	turquoise
LOC4347069	blue
LOC4339068	blue
LOC4352439	blue
LOC9267428	blue
LOC4332378	blue
LOC4346220	blue
LOC9268985	blue
LOC4338958	blue
LOC4325571	blue
LOC4351721	blue
LOC9267997	blue
LOC107275911	blue
LOC9271477	blue
LOC4325697	blue
LOC4335075	blue
LOC4334567	blue
LOC4343047	blue
LOC107276199	blue
LOC4329324	blue
LOC4344266	blue
LOC4331085	blue
LOC4328788	blue
LOC9266373	blue
LOC4338925	blue
LOC4348268	blue
LOC4340079	blue
LOC4344255	blue
LOC107276985	blue
LOC4339066	blue
LOC4340084	blue
LOC4326433	blue
LOC4331044	blue
LOC107276042	blue
LOC4335417	blue
LOC9271949	blue
LOC4348591	blue
LOC9272590	blue
LOC4334080	blue
LOC4352683	blue
LOC4346219	blue
LOC4344575	blue
LOC4337421	blue
LOC4331101	blue
LOC4332595	blue
LOC9268371	blue
LOC4343432	blue
LOC4345814	blue
LOC4346484	blue
LOC4336798	brown
LOC4347408	brown
LOC107275256	brown
LOC9268839	brown
LOC9269462	brown
LOC4347412	brown
LOC4332896	brown
LOC9266825	brown
LOC4342187	brown
LOC4333712	brown
LOC4345815	brown
LOC4329329	brown
LOC9270349	brown
LOC9271479	brown
LOC4326920	brown
LOC4326919	brown
LOC4324194	brown
LOC4336179	brown
LOC4332651	brown
LOC4324829	brown
LOC4339680	brown
LOC4344094	brown
LOC4327803	brown
LOC9270116	brown
LOC4347650	brown
LOC4339974	brown
LOC4337704	brown
LOC4348740	brown
LOC4347102	brown
LOC107278159	brown
LOC107276596	brown
LOC9269572	brown
LOC9268931	brown
LOC107275962	brown
LOC4347337	brown

## Sheet: Table S7
Table S7. GO function classification of 268 DEGs in turquoise module
Level	GO ID	GO Name	GO Type	GO Number	Parents (Name)	Nodescore	Sequences	Sequence Names
1	GO:0008150	biological_process	Biological Process			73.6	160	LOC4336235; LOC107278602; LOC4343726; LOC4345909; LOC4349274; LOC4325182; LOC107276262; LOC4326394; LOC9268919; LOC4328579; LOC4327887; LOC4336193; LOC4344706; LOC4337313; LOC4338405; LOC107276410; LOC4329093; LOC4336343; LOC4336189; LOC4332300; LOC4333118; LOC9272330; LOC4340683; LOC4331336; LOC4329013; LOC4346292; LOC4336908; LOC4342063; LOC4332705; LOC4348633; LOC4352613; LOC4346334; LOC112936…
2	GO:0050789	regulation of biological process	Biological Process	GO:0008150; GO:0065007	biological_process; biological regulation	9.17	40	LOC4336235; LOC4343726; LOC4335720; LOC107276247; LOC4336857; LOC4332778; LOC4325182; LOC4330735; LOC4342096; LOC4328579; LOC4326918; LOC4352487; LOC4336193; LOC9269394; LOC4346629; LOC107276410; LOC4334864; LOC9272330; LOC4340683; LOC4331633; LOC4342046; LOC4324781; LOC4346394; LOC4342440; LOC4342063; LOC4346153; LOC4328649; LOC9270863; LOC4331509; LOC4346334; LOC4349648; LOC4345687; LOC4351369;…
2	GO:0051179	localization	Biological Process	GO:0008150	biological_process	15.51	40	LOC107278602; LOC4345909; LOC4329742; LOC4325285; LOC4329486; LOC4331328; LOC4330713; LOC107276262; LOC4326394; LOC4348440; LOC4324610; LOC4331916; LOC4327448; LOC4346124; LOC4324213; LOC107275769; LOC9271905; LOC4352063; LOC4338405; LOC4329093; LOC4336442; LOC4336189; LOC4332300; LOC4336546; LOC107277149; LOC4341971; LOC4343574; LOC4336769; LOC4342063; LOC4346153; LOC4326745; LOC4345687; LOC4325…
2	GO:0008152	metabolic process	Biological Process	GO:0008150	biological_process	46.22	117	LOC4336235; LOC4343726; LOC4349274; LOC4325182; LOC9268919; LOC4328579; LOC4327887; LOC4336193; LOC4344706; LOC4337313; LOC107276410; LOC4336343; LOC4333118; LOC9272330; LOC4340683; LOC4331336; LOC4329013; LOC4346292; LOC4336908; LOC4348633; LOC4352613; LOC112936042; LOC4346334; LOC4351369; LOC4329655; LOC4347547; LOC4324802; LOC4335495; LOC4337274; LOC4330552; LOC4335720; LOC4349097; LOC4331886;…
2	GO:0065007	biological regulation	Biological Process	GO:0008150	biological_process	6.31	50	LOC4336235; LOC4343726; LOC4325182; LOC4330735; LOC4324610; LOC4328579; LOC4327887; LOC4326918; LOC4352487; LOC4336193; LOC4338405; LOC107276410; LOC4336546; LOC9272330; LOC4340683; LOC4329013; LOC4342063; LOC4328649; LOC9270863; LOC4346334; LOC4349648; LOC4345687; LOC4351369; LOC4329655; LOC9270824; LOC4326826; LOC4324802; LOC9266773; LOC9268232; LOC4335720; LOC107276247; LOC4336857; LOC4332778;…
2	GO:0009987	cellular process	Biological Process	GO:0008150	biological_process	27.1	94	LOC4336235; LOC107278602; LOC4343726; LOC4349274; LOC4328496; LOC4331822; LOC4325182; LOC4330735; LOC4324610; LOC4349359; LOC4346124; LOC4328579; LOC4327887; LOC9267910; LOC4326918; LOC4336193; LOC4352487; LOC4338405; LOC4335455; LOC107276410; LOC4336343; LOC4336546; LOC4341971; LOC9272330; LOC4340683; LOC4331336; LOC4329013; LOC4346292; LOC4336908; LOC4342063; LOC4327273; LOC4341170; LOC9269764;…
3	GO:0009058	biosynthetic process	Biological Process	GO:0008152	metabolic process	9.65	42	LOC4336235; LOC4343726; LOC4335720; LOC107276247; LOC4349097; LOC4328496; LOC4336857; LOC4332778; LOC4330735; LOC4325182; LOC4342096; LOC4328579; LOC4336193; LOC9269394; LOC4346629; LOC107276410; LOC4336343; LOC4334864; LOC9272330; LOC4340683; LOC4331633; LOC4329013; LOC4342046; LOC4324781; LOC4342440; LOC4329175; LOC4346153; LOC9270863; LOC4330716; LOC4331509; LOC4333807; LOC4346334; LOC4349648;…
3	GO:0044237	cellular metabolic process	Biological Process	GO:0009987; GO:0008152	cellular process; metabolic process	17.85	78	LOC4336235; LOC4343726; LOC4349274; LOC4328496; LOC4331822; LOC4325182; LOC4330735; LOC4328579; LOC4327887; LOC4326918; LOC4336193; LOC4352487; LOC4335455; LOC107276410; LOC4336343; LOC9272330; LOC4340683; LOC4331336; LOC4329013; LOC4346292; LOC4336908; LOC9269764; LOC4328649; LOC9270863; LOC4341170; LOC4330716; LOC4352613; LOC4346334; LOC4349648; LOC4345687; LOC4351369; LOC4329655; LOC4324802; L…
3	GO:0006807	nitrogen compound metabolic process	Biological Process	GO:0008152	metabolic process	9.46	67	LOC4336235; LOC4343726; LOC4331422; LOC4349274; LOC4331822; LOC4325182; LOC4330735; LOC9268919; LOC4349359; LOC4328579; LOC4327887; LOC4326918; LOC4336193; LOC4352487; LOC4335455; LOC107276410; LOC4336343; LOC9272330; LOC4340683; LOC4346292; LOC4328649; LOC9270863; LOC4346334; LOC4349648; LOC4345687; LOC4351369; LOC4329655; LOC9266773; LOC4335495; LOC4337274; LOC107280424; LOC4330552; LOC4335720;…
3	GO:0019222	regulation of metabolic process	Biological Process	GO:0050789; GO:0008152	regulation of biological process; metabolic process	8.47	36	LOC4336235; LOC4343726; LOC4335720; LOC107276247; LOC4336857; LOC4332778; LOC4330735; LOC4325182; LOC4342096; LOC4328579; LOC4326918; LOC4336193; LOC4352487; LOC9269394; LOC4346629; LOC107276410; LOC4334864; LOC9272330; LOC4340683; LOC4331633; LOC4342046; LOC4324781; LOC4346394; LOC4342440; LOC4346153; LOC9270863; LOC4328649; LOC4346334; LOC4349648; LOC4351369; LOC4329655; LOC4324664; LOC4345668;…
3	GO:0071704	organic substance metabolic process	Biological Process	GO:0008152	metabolic process	34.04	96	LOC4336235; LOC4343726; LOC4349274; LOC4325182; LOC9268919; LOC4328579; LOC4327887; LOC4336193; LOC4337313; LOC107276410; LOC4336343; LOC9272330; LOC4340683; LOC4331336; LOC4329013; LOC4346292; LOC4336908; LOC4348633; LOC112936042; LOC4346334; LOC4351369; LOC4329655; LOC4347547; LOC4324802; LOC4335495; LOC4337274; LOC4330552; LOC4335720; LOC4349097; LOC4331886; LOC107278464; LOC4342096; LOC433191…
3	GO:0051234	establishment of localization	Biological Process	GO:0051179	localization	25.41	40	LOC107278602; LOC4345909; LOC4329742; LOC4325285; LOC4329486; LOC4331328; LOC4330713; LOC107276262; LOC4326394; LOC4348440; LOC4324610; LOC4331916; LOC4327448; LOC4346124; LOC4324213; LOC107275769; LOC9271905; LOC4352063; LOC4338405; LOC4329093; LOC4336442; LOC4336189; LOC4332300; LOC4336546; LOC107277149; LOC4341971; LOC4343574; LOC4336769; LOC4342063; LOC4346153; LOC4326745; LOC4345687; LOC4325…
3	GO:0050794	regulation of cellular process	Biological Process	GO:0050789; GO:0009987	regulation of biological process; cellular process	9.87	39	LOC4336235; LOC4343726; LOC4335720; LOC107276247; LOC4336857; LOC4332778; LOC4330735; LOC4325182; LOC4342096; LOC4328579; LOC4326918; LOC4352487; LOC4336193; LOC9269394; LOC4346629; LOC107276410; LOC4334864; LOC9272330; LOC4340683; LOC4331633; LOC4342046; LOC4324781; LOC4346394; LOC4342440; LOC4342063; LOC4346153; LOC9270863; LOC4328649; LOC4331509; LOC4346334; LOC4349648; LOC4345687; LOC4351369;…
3	GO:0044238	primary metabolic process	Biological Process	GO:0008152	metabolic process	32.2	92	LOC4336235; LOC4343726; LOC4342714; LOC4352082; LOC4338611; LOC4331422; LOC4349274; LOC4328496; LOC4331822; LOC4325182; LOC4330735; LOC9268919; LOC4349359; LOC4328579; LOC4326918; LOC4336193; LOC4352487; LOC4337313; LOC4335455; LOC107276410; LOC4336343; LOC4332224; LOC9272330; LOC4340683; LOC4331336; LOC4329013; LOC4346292; LOC4336908; LOC4329175; LOC9269764; LOC4328649; LOC9270863; LOC4330716; L…
4	GO:1901576	organic substance biosynthetic process	Biological Process	GO:0071704; GO:0009058	organic substance metabolic process; biosynthetic process	10.45	40	LOC4336235; LOC4343726; LOC4335720; LOC107276247; LOC4349097; LOC4328496; LOC4336857; LOC4332778; LOC4330735; LOC4325182; LOC4342096; LOC4328579; LOC4336193; LOC9269394; LOC4346629; LOC107276410; LOC4336343; LOC4334864; LOC9272330; LOC4340683; LOC4331633; LOC4329013; LOC4342046; LOC4324781; LOC4342440; LOC4329175; LOC4346153; LOC9270863; LOC4330716; LOC4346334; LOC4349648; LOC4345303; LOC4351369;…
4	GO:0046483	heterocycle metabolic process	Biological Process	GO:0044237	cellular metabolic process	4.36	36	LOC4336235; LOC4343726; LOC4335720; LOC107276247; LOC4336857; LOC4332778; LOC4334834; LOC4330735; LOC4342096; LOC4325844; LOC4328579; LOC4327887; LOC4336193; LOC9269394; LOC4346629; LOC107276410; LOC4334864; LOC9272330; LOC4340683; LOC4331633; LOC4342046; LOC4324781; LOC4342440; LOC4346153; LOC9270863; LOC4333807; LOC4346334; LOC4349648; LOC4351369; LOC4329655; LOC4324664; LOC4345668; LOC4324706;…
4	GO:0051171	regulation of nitrogen compound metabolic process	Biological Process	GO:0006807; GO:0019222	nitrogen compound metabolic process; regulation of metabolic process	3.35	36	LOC4336235; LOC4343726; LOC4335720; LOC107276247; LOC4336857; LOC4332778; LOC4330735; LOC4325182; LOC4342096; LOC4328579; LOC4326918; LOC4336193; LOC4352487; LOC9269394; LOC4346629; LOC107276410; LOC4334864; LOC9272330; LOC4340683; LOC4331633; LOC4342046; LOC4324781; LOC4342440; LOC4346394; LOC4346153; LOC9270863; LOC4328649; LOC4346334; LOC4349648; LOC4351369; LOC4329655; LOC4324664; LOC4345668;…
4	GO:0044260	cellular macromolecule metabolic process	Biological Process	GO:0044237; GO:0043170	cellular metabolic process; macromolecule metabolic process	16.79	61	LOC4336235; LOC4343726; LOC4349274; LOC4331822; LOC4330735; LOC4325182; LOC4328579; LOC4326918; LOC4336193; LOC4352487; LOC4335455; LOC107276410; LOC4336343; LOC9272330; LOC4340683; LOC4331336; LOC4346292; LOC4336908; LOC9269764; LOC9270863; LOC4328649; LOC4346334; LOC4349648; LOC4345687; LOC4351369; LOC4329655; LOC9266773; LOC4337274; LOC107280424; LOC4335720; LOC107276247; LOC4331886; LOC433483…
4	GO:0031323	regulation of cellular metabolic process	Biological Process	GO:0050794; GO:0044237; GO:0019222	regulation of cellular process; cellular metabolic process; regulation of metabolic process	8.69	36	LOC4336235; LOC4343726; LOC4335720; LOC107276247; LOC4336857; LOC4332778; LOC4330735; LOC4325182; LOC4342096; LOC4328579; LOC4326918; LOC4336193; LOC4352487; LOC9269394; LOC4346629; LOC107276410; LOC4334864; LOC9272330; LOC4340683; LOC4331633; LOC4342046; LOC4324781; LOC4346394; LOC4342440; LOC4346153; LOC9270863; LOC4328649; LOC4346334; LOC4349648; LOC4351369; LOC4329655; LOC4324664; LOC4345668;…
4	GO:0006725	cellular aromatic compound metabolic process	Biological Process	GO:0044237	cellular metabolic process	4.79	38	LOC4336235; LOC4343726; LOC4335720; LOC107276247; LOC4349097; LOC4336857; LOC4332778; LOC4334834; LOC4330735; LOC4342096; LOC4325844; LOC4328579; LOC4327887; LOC4336193; LOC9269394; LOC4346629; LOC107276410; LOC4334864; LOC9272330; LOC4340683; LOC4331633; LOC4342046; LOC4324781; LOC4342440; LOC4346153; LOC9270863; LOC4333807; LOC4346334; LOC4349648; LOC4351369; LOC4329655; LOC4324664; LOC4345668;…
4	GO:0080090	regulation of primary metabolic process	Biological Process	GO:0044238; GO:0019222	primary metabolic process; regulation of metabolic process	3.26	36	LOC4336235; LOC4343726; LOC4335720; LOC107276247; LOC4336857; LOC4332778; LOC4330735; LOC4325182; LOC4342096; LOC4328579; LOC4326918; LOC4336193; LOC4352487; LOC9269394; LOC4346629; LOC107276410; LOC4334864; LOC9272330; LOC4340683; LOC4331633; LOC4342046; LOC4324781; LOC4342440; LOC4346394; LOC4346153; LOC9270863; LOC4328649; LOC4346334; LOC4349648; LOC4351369; LOC4329655; LOC4324664; LOC4345668;…
4	GO:0043170	macromolecule metabolic process	Biological Process	GO:0071704	organic substance metabolic process	22.43	72	LOC4336235; LOC4343726; LOC4331422; LOC4349274; LOC4331822; LOC4325182; LOC4330735; LOC9268919; LOC4349359; LOC4328579; LOC4326918; LOC4336193; LOC4352487; LOC4335455; LOC107276410; LOC4336343; LOC9272330; LOC4340683; LOC4331336; LOC4346292; LOC4336908; LOC9269764; LOC4328649; LOC9270863; LOC4330716; LOC4346334; LOC4349648; LOC4345687; LOC4351369; LOC4329655; LOC9266773; LOC4335495; LOC4337274; L…
4	GO:0006810	transport	Biological Process	GO:0051234	establishment of localization	40.43	40	LOC107278602; LOC4345909; LOC4329742; LOC4325285; LOC4329486; LOC4331328; LOC4330713; LOC107276262; LOC4326394; LOC4348440; LOC4324610; LOC4331916; LOC4327448; LOC4346124; LOC4324213; LOC107275769; LOC9271905; LOC4352063; LOC4338405; LOC4329093; LOC4336442; LOC4336189; LOC4332300; LOC4336546; LOC107277149; LOC4341971; LOC4343574; LOC4336769; LOC4342063; LOC4346153; LOC4326745; LOC4345687; LOC4325…
4	GO:0060255	regulation of macromolecule metabolic process	Biological Process	GO:0043170; GO:0019222	macromolecule metabolic process; regulation of metabolic process	13.99	36	LOC4336235; LOC4343726; LOC4335720; LOC107276247; LOC4336857; LOC4332778; LOC4330735; LOC4325182; LOC4342096; LOC4328579; LOC4326918; LOC4336193; LOC4352487; LOC9269394; LOC4346629; LOC107276410; LOC4334864; LOC9272330; LOC4340683; LOC4331633; LOC4342046; LOC4324781; LOC4342440; LOC4346394; LOC4346153; LOC9270863; LOC4328649; LOC4346334; LOC4349648; LOC4351369; LOC4329655; LOC4324664; LOC4345668;…
4	GO:0044249	cellular biosynthetic process	Biological Process	GO:0044237; GO:0009058	cellular metabolic process; biosynthetic process	12.59	40	LOC4336235; LOC4343726; LOC4335720; LOC107276247; LOC4349097; LOC4328496; LOC4336857; LOC4332778; LOC4330735; LOC4325182; LOC4342096; LOC4328579; LOC4336193; LOC9269394; LOC4346629; LOC107276410; LOC4336343; LOC4334864; LOC9272330; LOC4340683; LOC4331633; LOC4329013; LOC4342046; LOC4324781; LOC4342440; LOC4346153; LOC9270863; LOC4331509; LOC4333807; LOC4346334; LOC4349648; LOC4345303; LOC4351369;…
4	GO:1901360	organic cyclic compound metabolic process	Biological Process	GO:0071704	organic substance metabolic process	4.17	38	LOC4336235; LOC4343726; LOC4335720; LOC107276247; LOC4349097; LOC4336857; LOC4332778; LOC4334834; LOC4330735; LOC4342096; LOC4325844; LOC4328579; LOC4336193; LOC9269394; LOC4346629; LOC107276410; LOC4334864; LOC9272330; LOC4340683; LOC4331633; LOC4342046; LOC4324781; LOC4342440; LOC4346153; LOC4329175; LOC9270863; LOC4346334; LOC4349648; LOC4351369; LOC4329655; LOC9267503; LOC4324664; LOC4345668;…
5	GO:0009059	macromolecule biosynthetic process	Biological Process	GO:1901576; GO:0043170	organic substance biosynthetic process; macromolecule metabolic process	10.35	36	LOC4336235; LOC4343726; LOC4335720; LOC107276247; LOC4336857; LOC4332778; LOC4330735; LOC4325182; LOC4342096; LOC4328579; LOC4336193; LOC9269394; LOC4346629; LOC107276410; LOC4336343; LOC4334864; LOC9272330; LOC4340683; LOC4331633; LOC4342046; LOC4324781; LOC4342440; LOC4346153; LOC9270863; LOC4330716; LOC4346334; LOC4349648; LOC4351369; LOC4329655; LOC4345303; LOC4324664; LOC4345668; LOC4324706;…
Level	GO ID	GO Name	GO Type	Parents (ACC)	Parents (Name)	Nodescore	Sequences	Sequence Names
1	GO:0005575	cellular_component	Cellular Component			163.83	150	LOC107278602; LOC4336235; LOC4343726; LOC4345909; LOC4340732; LOC4342512; LOC4333404; LOC4349274; LOC4348342; LOC4326394; LOC107276262; LOC4348341; LOC4327887; LOC4336193; LOC9269452; LOC4344708; LOC4337313; LOC107276410; LOC4338405; LOC4329093; LOC107277982; LOC4336189; LOC4336343; LOC9272330; LOC4340683; LOC4333118; LOC4331336; LOC4329013; LOC4346292; LOC4336908; LOC107278035; LOC4342063; LOC43…
2	GO:0005623	cell	Cellular Component	GO:0005575	cellular_component	67.3	99	LOC107278602; LOC4336235; LOC4343726; LOC4340732; LOC4349274; LOC4326394; LOC4336193; LOC9269452; LOC107276410; LOC4338405; LOC4337313; LOC107277982; LOC4329093; LOC4336189; LOC4336343; LOC9272330; LOC4340683; LOC4331336; LOC4329013; LOC4346292; LOC107278035; LOC4336908; LOC4342063; LOC4332705; LOC4346334; LOC4351369; LOC4329655; LOC9270824; LOC4324802; LOC9268232; LOC4337274; LOC4335720; LOC4330…
2	GO:0005576	extracellular region	Cellular Component	GO:0005575	cellular_component	28.6	22	LOC4337313; LOC4335455; LOC107280424; LOC4341515; LOC4342204; LOC4332763; LOC4331336; LOC4346292; LOC4348342; LOC4336908; LOC4342086; LOC4330637; LOC4348341; LOC4327273; LOC4341170; LOC4347520; LOC4349359; LOC4327887; LOC4351187; LOC107281276; LOC9270308; LOC4324802
2	GO:0044425	membrane part	Cellular Component	GO:0005575; GO:0016020	cellular_component; membrane	30.26	78	LOC4345909; LOC4340732; LOC4338611; LOC107276347; LOC4342512; LOC4329742; LOC4349274; LOC4328496; LOC107276262; LOC4326394; LOC4324610; LOC4327448; LOC4349359; LOC4324213; LOC107275769; LOC4344505; LOC4351034; LOC4344708; LOC4338405; LOC4329093; LOC4336189; LOC4336343; LOC4336546; LOC9266405; LOC4341971; LOC4333118; LOC4341212; LOC4329454; LOC4346292; LOC4343079; LOC9270078; LOC107277021; LOC4327…
2	GO:0016020	membrane	Cellular Component	GO:0005575	cellular_component	125.23	89	LOC4345909; LOC4340732; LOC107276347; LOC4342512; LOC4338611; LOC4333404; LOC4349274; LOC4329742; LOC4328496; LOC107276262; LOC4326394; LOC4324610; LOC4327448; LOC4349359; LOC4324213; LOC107275769; LOC4326918; LOC4344505; LOC4351034; LOC4344708; LOC4338405; LOC4329093; LOC4336343; LOC4336189; LOC4336546; LOC9266405; LOC4341971; LOC4333118; LOC4341212; LOC4329454; LOC4346292; LOC4343079; LOC927007…
2	GO:0043226	organelle	Cellular Component	GO:0005575	cellular_component	34.19	59	LOC4336235; LOC4343726; LOC4340732; LOC4349274; LOC4328496; LOC4330735; LOC4327448; LOC4352487; LOC4336193; LOC9269452; LOC107276410; LOC4335455; LOC107277982; LOC4336343; LOC9272330; LOC4340683; LOC4329013; LOC4346292; LOC107278035; LOC9270078; LOC4342063; LOC4332705; LOC4329175; LOC4330716; LOC4346133; LOC4346334; LOC4349648; LOC4351369; LOC4329655; LOC9266773; LOC107280424; LOC4335720; LOC1072…
2	GO:0044464	cell part	Cellular Component	GO:0005623; GO:0005575	cell; cellular_component	112.16	99	LOC107278602; LOC4336235; LOC4343726; LOC4340732; LOC4349274; LOC4326394; LOC4336193; LOC9269452; LOC107276410; LOC4338405; LOC4337313; LOC107277982; LOC4329093; LOC4336189; LOC4336343; LOC9272330; LOC4340683; LOC4331336; LOC4329013; LOC4346292; LOC107278035; LOC4336908; LOC4342063; LOC4332705; LOC4346334; LOC4351369; LOC4329655; LOC9270824; LOC4324802; LOC9268232; LOC4337274; LOC4335720; LOC4330…
3	GO:0031224	intrinsic component of membrane	Cellular Component	GO:0044425	membrane part	49.44	78	LOC4345909; LOC4340732; LOC4338611; LOC107276347; LOC4342512; LOC4329742; LOC4349274; LOC4328496; LOC107276262; LOC4326394; LOC4324610; LOC4327448; LOC4349359; LOC4324213; LOC107275769; LOC4344505; LOC4351034; LOC4344708; LOC4338405; LOC4329093; LOC4336189; LOC4336343; LOC4336546; LOC9266405; LOC4341971; LOC4333118; LOC4341212; LOC4329454; LOC4346292; LOC4343079; LOC9270078; LOC107277021; LOC4327…
3	GO:0005622	intracellular	Cellular Component	GO:0044464	cell part	82.03	66	LOC107278602; LOC4336235; LOC4343726; LOC4342714; LOC4340732; LOC4349274; LOC4328496; LOC4330735; LOC4327448; LOC4346124; LOC4326918; LOC4352487; LOC4336193; LOC9269452; LOC107276410; LOC4335455; LOC107277982; LOC4336343; LOC9272330; LOC4340683; LOC4329013; LOC4346292; LOC107278035; LOC9270078; LOC4342063; LOC4332705; LOC4329175; LOC4330716; LOC4346133; LOC4346334; LOC4349648; LOC4351369; LOC4329…
3	GO:0005886	plasma membrane	Cellular Component	GO:0071944; GO:0044464; GO:0016020	cell periphery; cell part; membrane	30.94	29	LOC4338611; LOC107276347; LOC4329742; LOC4331328; LOC4330713; LOC4326394; LOC4348440; LOC4324610; LOC4324213; LOC4351034; LOC4352063; LOC4338405; LOC4329093; LOC4336189; LOC4336442; LOC4336546; LOC4341971; LOC4343574; LOC4343098; LOC4346153; LOC4329175; LOC107276173; LOC4343492; LOC4331509; LOC4336441; LOC4324802; LOC107276905; LOC9268232; LOC4337274
3	GO:0044424	intracellular part	Cellular Component	GO:0005622; GO:0044464	intracellular; cell part	136.72	66	LOC107278602; LOC4336235; LOC4343726; LOC4342714; LOC4340732; LOC4349274; LOC4328496; LOC4330735; LOC4327448; LOC4346124; LOC4326918; LOC4352487; LOC4336193; LOC9269452; LOC107276410; LOC4335455; LOC107277982; LOC4336343; LOC9272330; LOC4340683; LOC4329013; LOC4346292; LOC107278035; LOC9270078; LOC4342063; LOC4332705; LOC4329175; LOC4330716; LOC4346133; LOC4346334; LOC4349648; LOC4351369; LOC4329…
3	GO:0043227	membrane-bounded organelle	Cellular Component	GO:0043226	organelle	56.7	59	LOC4336235; LOC4343726; LOC4340732; LOC4349274; LOC4328496; LOC4330735; LOC4327448; LOC4352487; LOC4336193; LOC9269452; LOC107276410; LOC4335455; LOC107277982; LOC4336343; LOC9272330; LOC4340683; LOC4329013; LOC4346292; LOC107278035; LOC9270078; LOC4329175; LOC4342063; LOC4332705; LOC4330716; LOC4346133; LOC4346334; LOC4349648; LOC4351369; LOC4329655; LOC9266773; LOC107280424; LOC4335720; LOC1072…
3	GO:0043229	intracellular organelle	Cellular Component	GO:0043226; GO:0044424	organelle; intracellular part	56.98	59	LOC4336235; LOC4343726; LOC4340732; LOC4349274; LOC4328496; LOC4330735; LOC4327448; LOC4352487; LOC4336193; LOC9269452; LOC107276410; LOC4335455; LOC107277982; LOC4336343; LOC9272330; LOC4340683; LOC4329013; LOC4346292; LOC107278035; LOC9270078; LOC4329175; LOC4342063; LOC4332705; LOC4330716; LOC4346133; LOC4346334; LOC4349648; LOC4351369; LOC4329655; LOC9266773; LOC107280424; LOC4335720; LOC1072…
3	GO:0071944	cell periphery	Cellular Component	GO:0044464	cell part	22.3	38	LOC107278602; LOC107276347; LOC4338611; LOC4329742; LOC4331328; LOC4330713; LOC4326394; LOC4348440; LOC4324610; LOC4346124; LOC4324213; LOC9271905; LOC4351034; LOC4352063; LOC4338405; LOC4337313; LOC4329093; LOC4336442; LOC4336189; LOC4336546; LOC4332763; LOC4341971; LOC4331336; LOC4343574; LOC4336908; LOC4343098; LOC4342086; LOC4329175; LOC107276173; LOC4327273; LOC4346153; LOC4343492; LOC433150…
4	GO:0043231	intracellular membrane-bounded organelle	Cellular Component	GO:0043229; GO:0043227	intracellular organelle; membrane-bounded organelle	93.86	59	LOC4336235; LOC4343726; LOC4340732; LOC4349274; LOC4328496; LOC4330735; LOC4327448; LOC4352487; LOC4336193; LOC9269452; LOC107276410; LOC4335455; LOC107277982; LOC4336343; LOC9272330; LOC4340683; LOC4329013; LOC4346292; LOC107278035; LOC9270078; LOC4329175; LOC4342063; LOC4332705; LOC4330716; LOC4346133; LOC4346334; LOC4349648; LOC4351369; LOC4329655; LOC9266773; LOC107280424; LOC4335720; LOC1072…
4	GO:0016021	integral component of membrane	Cellular Component	GO:0031224	intrinsic component of membrane	81.2	77	LOC4345909; LOC4340732; LOC107276347; LOC4342512; LOC4329742; LOC4349274; LOC4328496; LOC107276262; LOC4326394; LOC4324610; LOC4327448; LOC4349359; LOC4324213; LOC107275769; LOC4344505; LOC4351034; LOC4344708; LOC4338405; LOC4329093; LOC4336189; LOC4336343; LOC4336546; LOC9266405; LOC4341971; LOC4333118; LOC4341212; LOC4329454; LOC4346292; LOC4343079; LOC9270078; LOC107277021; LOC4327273; LOC4328…
4	GO:0044444	cytoplasmic part	Cellular Component	GO:0044424; GO:0005737	intracellular part; cytoplasm	36.68	23	LOC107278602; LOC4335455; LOC4342714; LOC107280424; LOC4336343; LOC4340732; LOC4329013; LOC4328496; LOC4346292; LOC9270078; LOC4330735; LOC4342063; LOC4329175; LOC4330716; LOC4327448; LOC4331509; LOC4333807; LOC4346124; LOC4345303; LOC9271905; LOC107276957; LOC4346709; LOC4325529
4	GO:0005737	cytoplasm	Cellular Component	GO:0044424	intracellular part	51.01	29	LOC107278602; LOC4342714; LOC107280424; LOC4340732; LOC4349274; LOC4328496; LOC4330735; LOC4327448; LOC4346124; LOC9271905; LOC4326918; LOC107276957; LOC4352487; LOC4333060; LOC4346709; LOC4325529; LOC4335455; LOC4336343; LOC4329013; LOC4346292; LOC9270078; LOC4346394; LOC4342063; LOC4329175; LOC4330716; LOC4331509; LOC4333807; LOC4345303; LOC4345748
5	GO:0005634	nucleus	Cellular Component	GO:0043231	intracellular membrane-bounded organelle	41.56	41	LOC4336235; LOC4343726; LOC4335720; LOC107276247; LOC4349274; LOC4336857; LOC4332778; LOC4342096; LOC4352487; LOC4336193; LOC9269394; LOC9269452; LOC4346629; LOC107276410; LOC107277982; LOC4334864; LOC9272330; LOC4340683; LOC4331633; LOC4342046; LOC4324781; LOC4342440; LOC4346394; LOC107278035; LOC4346153; LOC4342063; LOC4332705; LOC4323850; LOC4333807; LOC4346133; LOC4346334; LOC4349648; LOC4351…
Level	GO ID	GO Name	GO Type	Parents (ACC)	Parents (Name)	Nodescore	Sequences	Sequence Names
1	GO:0003674	molecular_function	Molecular Function			101.13	176	LOC4336235; LOC4343726; LOC4340338; LOC4340732; LOC4333404; LOC4327121; LOC4349274; LOC4325182; LOC107278166; LOC4326394; LOC107276262; LOC9268919; LOC4328579; LOC4327887; LOC4336193; LOC9269452; LOC4344706; LOC107276410; LOC4338405; LOC4337313; LOC4329093; LOC107277982; LOC4336189; LOC4336343; LOC107277348; LOC9272330; LOC4340683; LOC4333118; LOC4331336; LOC4329013; LOC4346292; LOC4336908; LOC43…
2	GO:0005488	binding	Molecular Function	GO:0003674	molecular_function	67	103	LOC4336235; LOC4343726; LOC4333404; LOC107278166; LOC4327887; LOC4336193; LOC9269452; LOC4344706; LOC107276410; LOC4338405; LOC107277982; LOC4336189; LOC107277348; LOC9272330; LOC4340683; LOC4333118; LOC4329013; LOC107278035; LOC4332705; LOC4342063; LOC4352613; LOC4346334; LOC4323952; LOC4351369; LOC4329655; LOC4335495; LOC4324802; LOC4330152; LOC4335720; LOC4349097; LOC4331886; LOC107278464; LOC…
2	GO:0003824	catalytic activity	Molecular Function	GO:0003674	molecular_function	82.47	101	LOC4340338; LOC4340732; LOC4333404; LOC4327121; LOC4349274; LOC4325182; LOC9268919; LOC4326394; LOC4327887; LOC4336193; LOC4344706; LOC4338405; LOC4337313; LOC4336189; LOC4336343; LOC4333118; LOC4331336; LOC4329013; LOC4346292; LOC4336908; LOC4346295; LOC4342063; LOC4348633; LOC4352613; LOC112936042; LOC4347547; LOC4324802; LOC4335495; LOC4337274; LOC4337224; LOC4330552; LOC4349097; LOC4331886; L…
3	GO:0043167	ion binding	Molecular Function	GO:0005488	binding	20.89	53	LOC107275898; LOC4333404; LOC4328496; LOC4331822; LOC107278166; LOC4349359; LOC4327887; LOC4326918; LOC4336193; LOC4352487; LOC4344706; LOC4338405; LOC4336189; LOC107277149; LOC9266405; LOC4333118; LOC4329013; LOC4343079; LOC4329175; LOC4342063; LOC107276173; LOC4341170; LOC4352613; LOC4346133; LOC9266372; LOC4348796; LOC4323952; LOC4345687; LOC9267503; LOC4324802; LOC107281879; LOC4349097; LOC43…
3	GO:0016787	hydrolase activity	Molecular Function	GO:0003824	catalytic activity	69.73	45	LOC107280424; LOC4337224; LOC4352082; LOC4330552; LOC4338611; LOC4334038; LOC4331422; LOC4334834; LOC107278464; LOC4325182; LOC9268919; LOC4330637; LOC4331916; LOC4349359; LOC4325844; LOC9267999; LOC9266367; LOC4352063; LOC4335455; LOC4338405; LOC4337313; LOC4341515; LOC4336189; LOC4333413; LOC4332224; LOC4327297; LOC4331336; LOC4346292; LOC4336908; LOC4346295; LOC4347441; LOC4327273; LOC4342063;…
3	GO:1901363	heterocyclic compound binding	Molecular Function	GO:0005488	binding	51.75	67	LOC4343726; LOC107275898; LOC4331822; LOC107278166; LOC4330735; LOC4327887; LOC4326918; LOC9269452; LOC4344706; LOC107276410; LOC4338405; LOC107277982; LOC4336189; LOC107277348; LOC9266405; LOC9272330; LOC4340683; LOC4333118; LOC4343079; LOC107278035; LOC4342063; LOC4332705; LOC4329175; LOC4341170; LOC4346133; LOC4346334; LOC4349648; LOC4323952; LOC4345687; LOC4351369; LOC4329655; LOC9267503; LOC…
3	GO:0016740	transferase activity	Molecular Function	GO:0003824	catalytic activity	11.67	29	LOC4340338; LOC107280422; LOC4336955; LOC4340732; LOC4331886; LOC4349274; LOC4331822; LOC4326918; LOC4336193; LOC4333060; LOC4343910; LOC107275740; LOC4336343; LOC4343216; LOC4331336; LOC4346394; LOC9270078; LOC4336908; LOC4329175; LOC4349149; LOC4330716; LOC4343690; LOC9268653; LOC4324822; LOC4345687; LOC4345303; LOC4346755; LOC4344737; LOC4337274
3	GO:0097159	organic cyclic compound binding	Molecular Function	GO:0005488	binding	51.75	67	LOC4343726; LOC107275898; LOC4331822; LOC107278166; LOC4330735; LOC4327887; LOC4326918; LOC9269452; LOC4344706; LOC107276410; LOC4338405; LOC107277982; LOC4336189; LOC107277348; LOC9266405; LOC9272330; LOC4340683; LOC4333118; LOC4343079; LOC107278035; LOC4342063; LOC4332705; LOC4329175; LOC4341170; LOC4346133; LOC4346334; LOC4349648; LOC4323952; LOC4345687; LOC4351369; LOC4329655; LOC9267503; LOC…
4	GO:0003676	nucleic acid binding	Molecular Function	GO:1901363; GO:0097159	heterocyclic compound binding; organic cyclic compound binding	58.37	34	LOC4330152; LOC4343726; LOC4335720; LOC107276247; LOC4336857; LOC4330735; LOC4325844; LOC9269394; LOC9269452; LOC4346629; LOC107276410; LOC107277982; LOC4334864; LOC107277348; LOC9272330; LOC4340683; LOC4331633; LOC4342046; LOC4324781; LOC4342440; LOC107278035; LOC4332705; LOC4346133; LOC4346334; LOC9268017; LOC4349648; LOC4351369; LOC4329655; LOC4324664; LOC4345668; LOC4341509; LOC9266773; LOC43…
4	GO:0043169	cation binding	Molecular Function	GO:0043167	ion binding	23.68	31	LOC4333404; LOC4349097; LOC4331886; LOC4328496; LOC4349359; LOC4325844; LOC4336193; LOC9266367; LOC4337342; LOC4346709; LOC107277149; LOC4333118; LOC4329013; LOC4336769; LOC107276351; LOC4329175; LOC107276173; LOC4341170; LOC4347520; LOC4352613; LOC4346133; LOC4331509; LOC9266372; LOC4346234; LOC4348796; LOC4326048; LOC9267503; LOC4345986; LOC9270528; LOC4345748; LOC4324802
5	GO:0046872	metal ion binding	Molecular Function	GO:0043169	cation binding	39.47	31	LOC4349097; LOC4333404; LOC4331886; LOC4328496; LOC4349359; LOC4325844; LOC4336193; LOC9266367; LOC4337342; LOC4346709; LOC107277149; LOC4333118; LOC4329013; LOC4336769; LOC107276351; LOC4329175; LOC107276173; LOC4341170; LOC4347520; LOC4352613; LOC4346133; LOC4331509; LOC9266372; LOC4346234; LOC4348796; LOC4326048; LOC9267503; LOC4345986; LOC9270528; LOC4345748; LOC4324802
5	GO:0003677	DNA binding	Molecular Function	GO:0003676	nucleic acid binding	38.62	30	LOC4343726; LOC4330152; LOC4335720; LOC107276247; LOC4336857; LOC4330735; LOC9269394; LOC9269452; LOC4346629; LOC107276410; LOC107277982; LOC4334864; LOC107277348; LOC9272330; LOC4340683; LOC4331633; LOC4342046; LOC4324781; LOC4342440; LOC107278035; LOC4332705; LOC4346133; LOC4349648; LOC4351369; LOC4329655; LOC4324664; LOC4345668; LOC9266773; LOC4341509; LOC4334140

## Sheet: Table S8
Table S8. The corresponding gene names, sources, and sequences in turquoise module
Gene Symbol	Gene ID	Gene Names	Description in RAP-DB	Description in Gene Bank	Gene Sequence
LOC107277282	Os12g0623300	AMEIOTIC1*	/	protein AMEIOTIC 1 homolog	ATGACCGCCGCCGCCGTCAACGCCTCGCGCGTCATGCGCCGCCGCGCCGCAGGCGAGGACCTGGGCGACGGCGGCGATGGCGACGGCGACTTCTGGGCCGGTGGCGCCCCCCGCCTCTACGACTTCTCCCAGCAGGAGCAGAAGCCGTTCTTGCCCGCGCCCGCGCCCGCGCCGCCGTCGCCCGCGCCCGTCCCGGCGTCGCCGCCGTCCCCCGCGGCGGAGTCGGTGGCGCCGTGCCTCCTCACGCTGCAGTGCAGCGGCGTCGGGTGGGGTGTCAGGAAGCGGGTCCGGTACGTCGGGAGGCACCACCACCTCGCGCGCCACCACGCTCCCGAGCGCGCCGTGGACGCCGCGCGGGACGACGACGAGGCGAGCTCCGCCAAGGCCAAGAACGAGAGC…
LOC4323850	Os01g0577300	bHLH165	basic helix loop helix 165	anthocyanin regulatory R-S protein	ATGATGGCATCTGCTCCTTCAGCTCAGGAAGAACCCCTACAGCCAGGGACGATGCAATTCAGGAAGCAGCTTGCTGCTGCCGTGAGGAGCATCAGTTGGACCTATGCCATCTTTTGGTCCATTTCAACTACTCGTCCAGGAGTCCTGACATGGAATGACGGGTTCTACAACGGCGAGATAAAGACAAGGAAGATAGAGAACAACCTAGTGACGGAGCTCACAGCTGAGCAGCTCCTCCTACAGAGAAGCGAGCAACTGAGGGAGCTGTACAACTCTCTCCTCTCTGGTGAGTCTGCAGACCAACAGAGGAGGAGGCCTGTCACTGCACTATCGCCGGAGGATCTCGGCAACGTAGAATGGTACTACGTTGTCTGCATGACCTACGCCTTCCGCCCTGGA…
LOC4332778	Os03g0338400	bHLH166	basic helix-loop-helix protein 166	/	ATGATGTCGTCGAGGGAACGCAAGAAAGCGGCGGCGCTACAGGAGAAGCTGCAAATCCTCCGCTCCATCACTCACTCCCACGCTCTGAGCAACACGTCCATCTTAATGGACGCGTCCAAGTACATCAAGGAGCTGAAGCAGAAGGTCGTGAGGCTGAACCAGGAGATCGCTTGCGCGCAAGACGCTCTCAGACAAAATCGGGTGACCGTGGAAACCCTAAGACACGGGTTCCTCGTCAACGTCTTCTCCGGCAAGAGCTGCCCGGGGCTCCTCGTCTCCATCCTCGAGGCCTTCGACGAGCTCGGCCTCAGCGTCCTCGAGGCCACGGCCTCCTGCACCGACACCTTCCGCCTAGAAGCCATCGGTAGCGAGAACCTGATGGAGAAGGTGGACGAGCAC…
LOC9269854	Os02g0791300	bHLH168	basic helix-loop-helix protein 168	transcription factor IBH1-like 1	ATGCCTTCAGCTAGAGTGCAAGCTGGCGGCGGCGGCAACGGCGGCGCCGGCGGCGGCGGCTCGGGGAGGTTCAAGCGGGCGCTGCTCCGGAACCTCATCCTAGGGCTCAGGAAGGGCGGCGTGGCGTCCGGGGAGATGGGTTTCCACGAGAGGAAGAGCGCCATCAAGCGCGCCGCCGACGCCGCGCTCGCCGCCGCCAGGGGCGCCGCGCCGTGCTGGAGCCGGTCGCTGGCGGCGGAGCTCGCGCAGGCGCCGCAGCAGCACCGTTCGCCGCCGTCGCCGTCGCCGAGGAAGATGATCTGCAGGAAGATCGTGAGGAGGAGCCTGATCCGCCGGCGGCGGCGGCCGATCAGGCCGGCGAACAACACCACGGCGGCCACCACAAAGGCGTACGGCGGC…
LOC4348595	Os10g0409400	BURP16	BURP DOMAIN-CONTAINING PROTEIN 16	BURP domain-containing protein 16-like	ATGGCAACATCCTTTCTCTTCTCTCTCATTCTCCTCCTCATCACTGCCCTTTCTCTTCCCTTTCCTCTCCATGCGTCATCTGTAGACCCCTTGAGCGCCGGTGCGACCACCGTCCGCTACTGGAATCGCAAGATTCCTAACAATGCTCCTCACCCCGACTTCTTCCTTTCACTCCTCTCCCCTCTTCCCGCATCTGTCTCCTCTTCCCTCTCCTCTCCGCTCTCCATATCCCCATCCATCTGCCGCTCTGCTCGCCTCCTCTGCCCTAACTCTACCTATTTTCAGTCCCTCTCAAGCACTGTCTTCATAGATGGATGCACCTTTAGTTACTCATGCACCTTCACATACGAACATACCAACATCACTATAAAGCCTGGTATATTTTTTCGGGAGCAAGAA…
LOC107280921	Os05g0221900	BURP8	BURP domain-containing protein 8	BURP domain-containing protein 8	ATGCCCGGCGCCATTCGCGACCTCATCAACCCTGCGAGGTCAGCTTCGCAGGAGGACACGGACATGGACGAGGTGAGCACGGACGCGGTGTTCTTCCTCGAGAAGGACCTGTTCCCGGGCTCCAAGATCACGCTCCACTTCACCCGCGGCGGCGCCTGCGCCATGGTGCTCCTCCGTGGCCGCGCCGACGCCATCCCGTTCGCCTCCGAGAAGCTCCCGGAGATCCTCACCCAGCTCTCCGTCCCCGCCGGCTCACGCGCCGCCGAGGACATGCGGACCACCCTCGCCGAGTGCGAGGCCGCGCTGCTCGGCGCCCGCGACCAGGCCAAGCACTGCGTGACGTCGCTCGAGTCCATGGTCGAGTTCGCCGCCGCCAGCCTCGGCACCCGCGACATCCGC…
LOC4328579	Os02g0191600	BZIP16	b-ZIP TRANSCRIPTION FACTOR 16	basic leucine zipper 43	ATGCAGCATGATGCCATATCCAACATTGCATACCATCCTAGCATGGATTTCACAAGCTTTTTCCTGCCGCAAACCGACGCTTACTCGCATGATCTCAGTGCATTGCTGGACATGGCTGTGGTTGATCCATACATCAGCTGCAATGGCAGCAGCATCACCATGATTCCAGTGACTGAAGATGAAGCAAATGCTCAGCCGATGAACCATGGCAATGACGAGAGGAAGAAGAGAAGGCTGGTGTCAAACCGTGAGTCTGCAAGGAGGTCCCGGGTGAGGAAGCAGAGGCGCCTGGATGAGCTCTCATCTCAGGTTTCAGAGCTTCGAGACACCAACCAGAGGCTTCTTGTTGAGCTGAATCACATGATCTCCAAGCATGCTCGCATTGTCAGGGAGAATTCC…
LOC107276173	Os02g0291400	CBL8	CALCINEURIN B-LIKE PROTEIN 8	calcineurin B-like protein 8	ATGGGCTGTGTATCATCAAAGCAGTTCAAAAGAGCTGCACAACATGAGGATCCTGCTATTCTGGCCAAAGAGACTACATTTTCAGTGAGTGAAGTGGAGGCCCTCTTTGAGCTGTTCAAGAAGATAAGCCATTCCATATTCAGAGATGGTCTCATTCACAAGGAGGAGTTCCAGCTAGCTCTCTTCAGGAACAGCAACAAGAAGAACCTTTTCGCCAATCGGATATTTGATCTCTTTGATCTGAAGCGCAACGGTGTTATCGATTTCGGGGAGTTCGTTCGATCCCTCAGCATTTTTCACCCGGAAACGCCTTTGGGAGACAAGATTGCCTTTGCATTTAGGTTGTATGACCTGAGAGGAACTGGATGCATTGAACGTGAAGAGTTGCACGAAATGGTG…
LOC107278611	Os06g0153000	CEP10	C-TERMINALLY ENCODED PEPTIDE 10	/	ATGGCGCCTCTGTACTGCGGCGGCAGGGTGGCGGCGGCGGCGGTGCTCCTGGCGCTCCTCGTGGCGGTCGTGGCGCCGCCGGCGACGACGTGCGCGGACGCGGCGCGGGTGCTGCTCGGCGGCGAGCTGGCGGCGGCGGCGGCGGCGACGCGAGTAGAGGAGCAGGATGTGAAGACGACGACGACGCAAGCAGCAGCAGCAGCTCCGCCGCCGCCGCCGTCGTTCGCGCGGTGGAGGACGGCCGCCGGCAATGCTGCGGCGGCGAGGTTCCTCGGCTCCGTCCCGAGCCCTGGGATCGGGCACTAG
LOC4348633	Os10g0416500	CHIB1	Chitinase 1	chitinase 1	ATGGTGAACGGCTACTTGTTCCGGGAGTACATCGGCGCGCAGTTCACCGGCGTGCGCTTCTCCGACGTGCCCGTCAACCCGGGCCTCAGCTTCCACTTCATCCTCGCCTTCGCCATCGACTACTTCATGGCGACGCAGTCCTCCAAGCCGGCGCCAGCCAACGGCGTGTTCGCCCCGTACTGGGACACGGCCAACCTGTCCCCGGCCGCCGTCGCCGCGGCCAAGGCGGCGCACCCCAACCTCAGCGTCATCCTCGCCCTCGGCGGCGACACCGTCCAGAACACCGGCGTCAACGCCACGTTCGCGCCGACGTCGTCCGTCGACGCGTGGGTGCGCAACGCCGCCGACTCCGTCTCCGGCCTCATCGACGCCTACGGCCTCGACGGCGTCGACGTCGAC…
LOC4327887	Os01g0775400	CKX5	CYTOKININ OXIDASE/DEHYDROGENASE 5	cytokinin dehydrogenase 5-like	ATGGCGTGGTGCTTGGTGTTCATGGTGTTCTTGATCTACTGCCTCATCTCGACTGTCGGGCTGCCGGTGGCGCCGGCCGACGAGGCGGCGATGCAGCTGGGCGGCGTCGGCGGTGGGCGGCTCAGCGTGGAGCCGTCTGATGTGATGGAGGCGTCCCTTGACTTTGGGCGGCTCACCAGCGCCGAGCCGCTGGCCGTGTTCCACCCGCGCGGGGCCGGCGACGTCGCCGCGCTGGTGAAGGCGGCGTACGGGTCGGCCAGCGGCATCCGCGTCTCGGCGCGGGGGCACGGCCATTCCATCAGCGGGCAGGCCCAGGCGGCCGGCGGGGTGGTCGTGGACATGAGTCACGGGTGGCGCGCGGAGGCGGCGGAGAGGACGTTGCCGGTGTACTCGCCGGCG…
LOC4333404	Os03g0603100	CYP78A11	P450 78A11	cytochrome P450 78A5	ATGGTGTCCTTCTACCTCGACTCCACCTTCCTGCCTCTCCTCGCCACCACCATGGCCAGCCCACTCCACGCCTGCCTCCTCCTCGCCCTCCTCTTCCTCGCGCTCGCCTTCTTCCACCCCGGCGGCGTCGCGTGGGCGCTGTCGTCGTCCGGCGGCCACGGCGCCGCCGCCATCCCTGGCCCGCGGGGAGTCCTGCTCGCGTTCGCCGGCCCGAACCCGCACCGCGCGCTGGCCAGCCTCGCCGCGTCGACGCGCGGGGCCACGCGCCTCATGGCGTTCTCCGTCGGGCTCACCCAGTTCGTGGTGGCGAGCCACCCGGACACGGCGCGGGAGATCCTCGCCGGCGCCGCGTTCGCCGACCGCCCCGTGAAGGAGGCCGCCGCGGAGCTCATGTTCCAC…
LOC9270528	Os03g0134500	CYP78A9	Cytochrome p450 (CYP78A9)	cytochrome P450 78A6	ATGGAGAGCTCAGCAGCTGAGAACTGGTGGGTGCTGCCACTGACCTTCCTCCCGCCCATCTCAGGGCAAAATGAGAGCGCTGCCACACTGTCAGCCATGGCCACGAGCTTCGTCTACCTCGCGATCTTTGCATGCCTTGCATGGGCAGGCACTGCTCTGCTCTACTGGGCTCACCCGGGTGGCCCTGCATGGGGCAAGTACCGGAGGGCGAGGGGGCAGAGCCCGAGGTGTTCGATCCCAGGGCCGAAAGGGCTCCCGGTCGTCGGAAGCCTCGGCCTCATGTCCGGGCTGGCGCACTGCTCGCTGGCCGCCGAGGCGGCGCGCCGGCCGGGTGCCAAGAGGCTCATGGCGCTGTCGCTCGGCCCGGTACGCGCGGTCGTCACGTCGCACCCGGACGTG…
LOC4345986	Os08g0507702	CYP76M5*	Cytochrome P450 family protein	cytochrome P450 76M5-like	ATGGAGAGCGAGGTGTGTTGGCTGCTATGCGCAGCGCTCGCCGCCGCGATGGCTTGCTACTACCTCACCGGCACGATGCGCCGCCGATCGCGGCGGCTGCCTCCTGGCCCGACGCCGCTCCCGGTGATCGGCAACGTGCTCAGCCTGCGCGGCAACATGCACCACGCTCTGGCGCGCCTCGCCGGCGAGCACGGCCCCGTGATGGCGCTGAAGCTGGGCCTCGTCACCACCGTGGTCGTCTCGTCGGCCGGCGCGGCGAGGGAGGCGTTCACCAAGCACGACCGGCGCCTCGCGGCGCGCGCGGTGCCGGACACTACCCGCGCGCGCGGGTTCGCCAGCCGGTCCATGATATGGCTGCCGAGCTCCGACCCGCGCTGGAAGACGCTGCGCGGCGTGGCG…
LOC4338611	Os05g0375400	EGL1	endo-(1,3;1,4)-β-glucanase 1	lichenase-2	ATGGCTAGCCAAGGTGTAGCCTCCATGTTCGCTCTCGCATTGCTCCTCGGTGCCTTTGCCTCCATTCCTCAAAAGGCGGAGGCGATCGGGGTGTGCTACGGCATGAGCGCGAACAACCTGCCGCCGGCGAGCTCGGTGGTGGGGATGTACCGCTCCAACGGCATCACGTCGATGCGGCTGTACGCGCCGGACCAGGCGGCGCTGCAGTCGGTGGGCGGCACGGGGATCAGCGTCGTCGTCGGCGCGCCCAACGACGTGCTCTCCAACCTCGCCGCCAGCCCCGCCGCGGCGGCGTCGTGGGTGCGGAACAACATCCAGGCCTACCCGTCGGTGTCGTTCCGGTACGTCGCCGTCGGGAACGAGGTCGCCGGCGGCGCCACGTCCAGCCTGGTCCCGGCC…
LOC4346629	Os09g0287000	ERF63	ETHYLENE RESPONSE FACTOR 63	ethylene-responsive transcription factor 1-like	ATGTGTGGAGGAGCACTGATCCCGAACGACTATGGCGACAAGCCGCCGCCGCCGCCGTCGGAGTCGTCGGAGTGGGACGCCACAACGAAGATGAAGAAGAAGAAGAAGCGTGGTGGCGGCGGCGACGACGACTGGGAGGCCGCCTTCCGGGAGTTCATCGCTGGCGACGACGACGACGACGACGGCGGCGTTTCCATGTTCCCTTCTGGTGCAGGGACGATGGAGACGACCACAGAGGTGGCGCCGGCGGCGGCGGTGGTGGAGAGGCCGCGGCGGCGGCGAAGGGTGAGGCGGAGCTACCCGTACCGCGGCGTCCGGCAGCGGCCGTGGGGGCGGTGGGCGTCGGAGATCCGCGACCCCGTCAAGGGCGCCCGCGTCTGGCTCGGCACCTTCGACACC…
LOC107276410	Os02g0520000	ERF81	ETHYLENE RESPONSE FACTOR 81	ethylene-responsive transcription factor LEP	ATGGATTTCTACTTCTTCTCCTCGTCGGCGCCGGCGCCGGAGAAGAAGACGAGGCGGCAGCAGCAGCAGCAGCAGCAGCGGGAGCAGGAGGGGGGTGGAGGAGGGAACGAGGCGAGATACCTCGGCGTGAGGCGGCGGCCGTGGGGCCGGTACGCGGCGGAGATCAGGGACCCGGCGACCAAGGAGCGGCACTGGCTGGGCACGTTCGACACGGCGGAGGAGGCCGCCGTCGCCTACGACCGCGCCGCCCGCACCATCCGCGGCGCCGCCGCGCGCACCAACTTCGCCTACCCGGACCTGCCCCCGGGCTCCTCCCTCACGCCCTACCTCTCCCCCGACCTCTCCACCAACGACCTCCACCGCCACTACTACGGCGCCGGCGCCGGCGCCGACACCCAG…
LOC4335720	Os04g0399800	ERF82	ETHYLENE RESPONSE FACTOR 82	ethylene-responsive transcription factor LEP	ATGATGAACTTCTCCTCGTACTTCTACTCGTCGTCGGCGGCGGCGGCGGGTGGTGGTGGTGGTGGTGGGGAGAAGAAGTCGTCGTCGTCGTCGGCGTCGAAGAAGAAGCAGCAGCAGGCGGCGGCGGCGGAGGGAGGGAATAACCAGACGAGGTACCTTGGGGTGAGGAGGAGGCCGTGGGGGAGGTACGCGGCGGAGATCAGGGACCCGGCGACGAAGGAGAGGCACTGGCTGGGGACGTTCGACACGGCGGAGGAGGCCGCCGTCGCCTACGACCGCGCCGCGAGGTCGCTCCGCGGCGCCCGCGCGCGCACCAACTTCGCCTACCCGGACCTCCCCCCGGGCTCCTCCGTCACCCCCTACCTCTCCCCCGACCTCTCCGCCGACGCCTCCGATCAG…
LOC4331633	Os03g0150200	ERF88	ETHYLENE RESPONSE FACTOR 88	ethylene-responsive transcription factor ERF096	ATGGAGGACGACAAGAGTAAGGAGGGGAAATCGTCGTCGTCGTACCGCGGCGTGCGGAAGCGGCCGTGGGGCAAGTTCGCGGCGGAGATCCGCGACCCGGAGCGCGGGGGAGCCCGCGTGTGGCTCGGCACGTTCGACACCGCGGAGGAGGCCGCGCGGGCGTACGACCGCGCCGCATTCGCCATGAAGGGCGCCACGGCCATGCTCAACTTCCCGGGAGATCATCATCACGGCGCCGCAAGCAGGATGACCAGCACCGGCTCTTCTTCGTCCTCCTTCACCACGCCTCCTCCGGCGAACTCCTCCGCGGCGGCGGGCCGCGGCGGCTCCGATCGGACGACGGACAAGGTGGAGCTGGAGTGCCTCGACGACAAGGTCCTGGAGGACCTCCTCGCGGAG…
LOC4330777	Os02g0756200	EXORDIUM*	Similar to Phi-1-like phosphate-induced protein	protein EXORDIUM	ATGGCTTCGTTTAGGCTAATGATAGCGGCGGTGTCTCTGAGCCTCGTGCAGCTCTCCATGGGGAGCAGGAGGTTAATGGAGCTGTACATACCTCCGGCGAGTGACCAGCTCACGTACCACCACGGCAGCGTGCTCAGTGGCGACATCCCGGTGTCCATCCTCTGGTACGGCAAATTCACGCCGACGCAGATGTCGATCATCGCCGACTTCGTCGTCTCGCTCACCGGCGCGCCGAACGCGGCCACGCCGTCGGTCGGGCAGTGGTGGGGCACCATCGAACAGCTCTACCTGTCCAACGCCGCCACGAACAGCCAGACCTCCACACGCGTGCTCCTCGATGAGCAGGTCTCGGACGAGCAGTGCTCCCTCGGCAAGTCTCTCACCCTGGCTCAGATCGAC…
LOC4346124	Os08g0530300	EXO70F4	EXOCYST SUBUNIT EXO70 FAMILY PROTEIN F4	exocyst complex component EXO70B1	ATGGCGGACGGCGCGCGGGACGCCGTGGTGGAGGTCGCGAAGCACATGGGGAAGAGCCTCGCGGTGTCCAAGAACGCGGCCGATGACATGATGCGCGTTCTGTCCAGGTACGAAGGTGAGGCGCCCATGTTCCCCTTGTCACATCCGGAGGTGGATCAGGCGGAGGAGGAGGAGGTGTTCGCGGCGGCGGAGGACATCATCCGCCGGTGCAACTCGGTGTCGTCGCCGTCCGAGATGGTTGATTATCTTTACGCCGTGGACGACGCGATCGCCGCGACGGCGCTCCAGGGCGAGCTGGCGTCCCGCGCCGCGGAGACCGTGCAGGCCGCCATGCCGCGGCTCGAGGAGGAGGTGCGCGCGCTGCTGGGCTCCTCCGCGCGGCGCCTCTCGCTCGACTCG…
LOC4332763	Os03g0336400	EXPA6	ALPHA-EXPANSIN 6	expansin-A6-like	ATGGCGCCACCCCTGCTCCTCCTCCTCGCTTCTCTCCTCCTCGTCGCAGCGCGGCGAGCCCTCGGCCTCGGCCTCGGCCAGTGGCAGCCCGGCCACGCCACGTTCTACGGCGGCGGCGACGCCTCCGGCACGATGGGTGGCGCGTGCGGGTACGGGAACCTGTACAGCCAGGGGTACGGCACGAGCACGGCGGCGCTGAGCACGGCGCTGTTCAACAGGGGCCTGAGCTGCGGCTCCTGCTACGAGCTCCGGTGCGCGGGCGACCACCGCCGGTCGTGCCTCCCCGGCGGCGCCACCGTGACGGTGACGGCGACCAACTTCTGCCCCCCGAACTACGCGCTCCCGAGCGACGGCGGCGGCTGGTGCAACCCACCGCGGCGGCACTTCGACCTCGCCGAG…
LOC4338619	Os05g0376800	GAST1*	Gibberellin regulated protein family protein	protein GAST1	ATGGAGGGCGTCGGTGTTGGGGTTAGAATTAGAGCGCTGCTCTGCTGCATTGCGATGGCGGCGATGCTTCTCAGTTCCTACCAGCAAGGCCAGGCCGAGGCCTCTTACATGCCATGGCCGCCAGCTACGCCGCCGCCACCTGCTGCTGCCGCTGCCAACTCCACCTCCACCGCGGCGGCGAACAACTCGTCGTCGTCGTCGTCCACCACCGCGCCGCCGCAGCAGCCGACCGCCTTCCCCATGTACGGCGTGACCCCCGGCAGCCTCCGGCCGCAAGAGTGCGGGGGTCGGTGCGCGTACAGGTGCTCGGCGACGGCGTACAGGAAGCCGTGCATGTTCTTCTGCCAGAAGTGCTGCGCCTCCTGCCTCTGCGTGCTGCCGGGGACCTACGGCAACAAG…
LOC4330716	Os02g0745400	GAUT11	GALACTURONOSYLTRANSFERASE 11	probable galacturonosyltransferase 9	ATGGCAGGCGGCGGCGGCGGCGGCAGAGCTTCCGCGCAGCGGCGGGCGGCGCTCGCGGCGCTGATCACGCTCCTCTTGCTTGCGTCCCTCGCTTTCCTCCTGTCGGCGACGGGCACCGCCTCCGCCCCGAACTCCGCACCCTTCCGGCTGGCCGCCATTCGCCGCCACGCCGAGGACCACGCCGCCGTTCTCGCCGCCTACGCGGCCCAGGCGCGGAAACTCAGCGCGGCCTCCGCCTCCCAGACGGAGTCTTTCTTGTCTATCTCCGGGCATCTCAGCTCGCTCTCGTCCCGCATCTCCCTGTCCACCGTCGCGCTCTTGGAGAAGGAGACGCGCGGGCAAATCAAGCGCGCCCGCTCCCTGGCAGGCGCCGCCAAGGAGGCGTTCGACACGCAGTCC…
[truncated: 245 more rows]

## Sheet: Table S9
Table S9. Expression profiles of the ethylene synthase genes and ethylene response factor genes
[truncated: 30 more rows]

## Sheet: TableS10
Table S10. Expression profiles of genes related to auxin and genes regulating cell elongation
[truncated: 34 more rows]

[truncated: 2 more sheets: Table S11, Table S12]
